# Supplementary material for: miR-434-3p and DNA hypomethylation co-regulate eIF5A1 to increase AChRs and to improve plasticity in SCT rat skeletal muscle
Source: PubMed Central journal article supplement (PMC4786822; doi:10.1038/srep22884), 2016-03-11
Supplement: srep22884-s1.pdf [file srep22884-s1.pdf]

**miR-434-3p and DNA hypomethylation co-regulate eIF5A1 to increase AChRs and to improve plasticity in SCT rat skeletal muscle**

Short title: miR-434-3p/eIF5A1 mediated AChRs in SCT rat muscle

Fei-Fei Shang<sup>1,\*</sup>, Qing-Jie Xia<sup>1,\*</sup>, Wei Liu<sup>2</sup>, Lei Xia<sup>2</sup>, Bao-Jiang Qian<sup>4</sup>, Ling You<sup>4</sup>, Mu He<sup>3</sup>,  
Jin-Liang Yang<sup>1,\*,#</sup>, Ting-Hua Wang<sup>1, 2, 3, 4,\*,#</sup>

<sup>1</sup>Institute of Neurological Disease, State Key Laboratory of Biotherapy and Cancer Center, West China Hospital, Sichuan University, and Collaborative Innovation Center for Biotherapy, Chengdu, 610041, P. R. China

<sup>2</sup>Department of Anesthesiology and Translational Neuroscience Center, West China Hospital, Sichuan University, Chengdu, 610041, P. R. China

<sup>3</sup>Department of Neurosurgery, West China Hospital, Sichuan University, Chengdu, 610041, P. R. China

<sup>4</sup>Institute of Neuroscience, Kunming medical University, Kunming, 650031, P.R. China

\*These authors contributed equally to this work.

#Corresponding authors:

Ting-Hua Wang, Institute of Neurological Disease, State Key Laboratory of Biotherapy, Department of Anesthesiology and Translational Neuroscience Center, West China Hospital, Sichuan University, P.R. China. E-mail: tinghua\_neuron@263.net

Or Jin-Liang Yang, State Key Laboratory of Biotherapy and Cancer Center, West China Hospital, Sichuan University, and Collaborative Innovation Center for Biotherapy. E-mail: jlyang01@163.com

Fig. S1

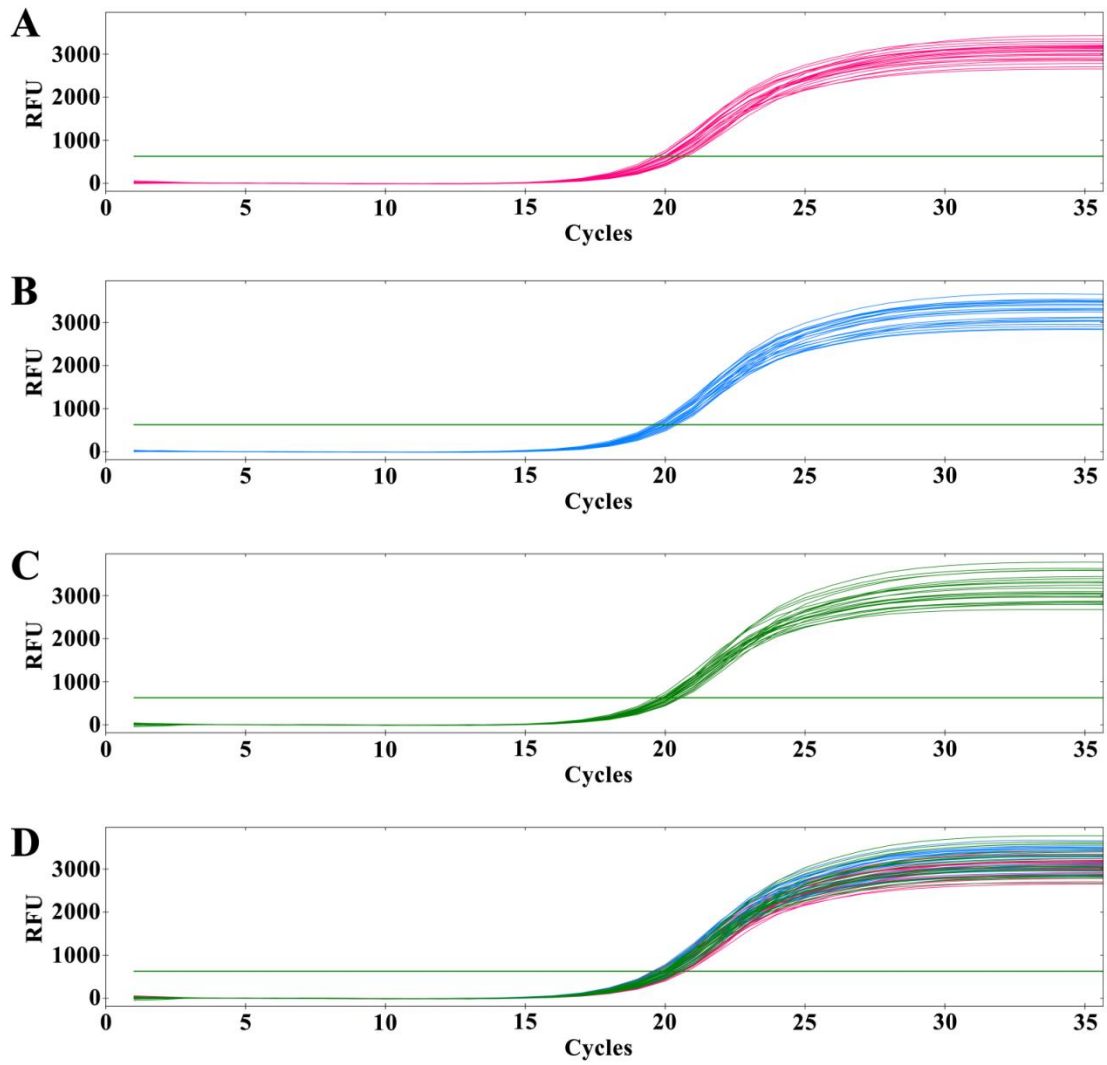

Fig. S1. The Ct values of  $\beta$ -actin in gastrocnemius.

(A) Normal group. (B) SCT 14 days post operation (dpo). (C) SCT 28 dpo. (D) Merged with normal, 14dpo and 28 dpo groups.

Fig. S2

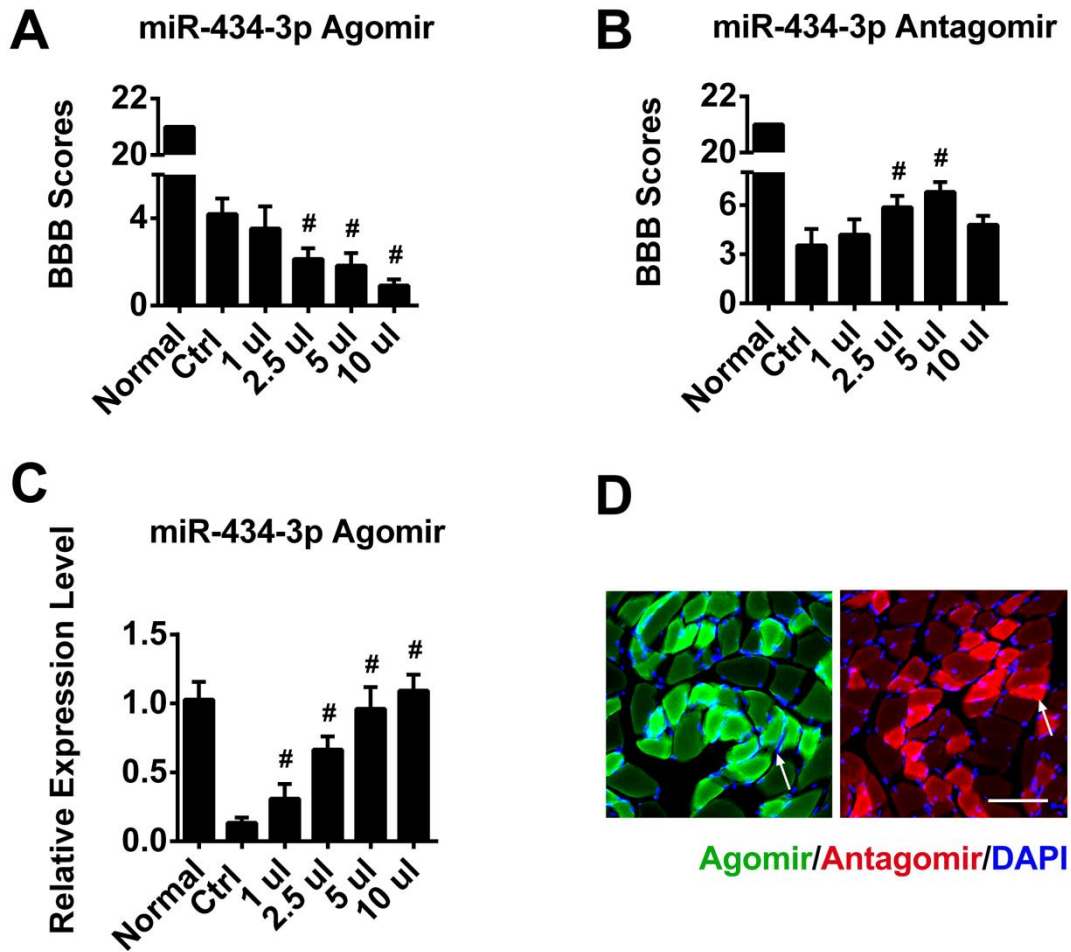

Fig. S2. In condition experiment, the optimal dose of miR-434-3p agomir or antagomir was 5 ul per injection site.

(A, B) After gastrocnemius received 4 gradient dosages of agomir or antagomir (20  $\mu$ M), the motor function recovery was measured by BBB scores at 28 dpo. Normal group were  $21 \pm 0.00$  (C) After gastrocnemius received 4 gradient dosages of agomir (20  $\mu$ M), the miR-434-3p was measured by RT-PCR at 28 dpo. (D) miR-434-3p agomir modified by FAM (green) and miR-434-3p antagomir modified by Cy3 (red) were injected in rats' gastrocnemius respectively. The arrow pointed out positive cells transfected successfully. Bar=100 um. Ctrl, SCT group; dpo, days post operation. #,  $P < 0.05$  compared with the ctrl group.

**Table S1. The primers for RT-PCR**

| Gene   | Forward primer           | Reverse primer            | Length |
|--------|--------------------------|---------------------------|--------|
| ACTB   | GGTCACCCACACTGTGCCCATCTA | GCCACGCTCGGTCAGGATCTTCAT  | 118 bp |
| eIF5A1 | GGGAGTGGGTACTGCCTGTGGTTT | AGATGCCTGAGGAGGGATCGTGTC  | 275 bp |
| Chrna1 | GGCACTTGACCTATGACGGCTCT  | GACGCTGCATGACGAAGTGGTAGG  | 190 bp |
| Chrb1  | AGGGAAGGAAGGACATCGTGAGGA | GCCAGCAGCAGCAAGAACACAGT   | 207 bp |
| Chrd   | GCCGAAGCCGCTCTTCTACATCA  | CGTGCTGGGTGTTTCGGAAGTGGAT | 293 bp |
| Chre   | ACGCCAACGACTCACGCCACAT   | TCCAAGTTCCATGCCGATGCCTCT  | 223 bp |
| Map2k6 | AGCCACGGACTTGACTGGTTGACC | GGACTCCTCGTATGCCTCGCCATT  | 268 bp |
| Tnnt1  | AGCCGTCCTGTGGTTCCTCCTT   | CCTCCTCCTCCTTCCGCATCTTCT  | 289 bp |
| Camk2d | CGCCGTGATGGGAAGTGGCAGAAT | CGCCAGGTGCCTTGAGGACAGAAT  | 204 bp |
| Svil   | AGAGTCTGCTGAACCAGGCGAACC | TGCACCTGCTCCACCTCTCCAAGT  | 192 bp |
| Myod1  | CGCAACGCCATCCGCTACATTGAA | TCGCTGGACGCCTCACTGTAGTAG  | 257 bp |
| Myl3   | CCAGCACATGGTCGCAGATCACTC | CGCAGGGTGGAGACAGAAAGGGTA  | 101 bp |
| Tnnc1  | GATGGCAGTGGCACAGTGGACTTC | AGATCCGACAGCTCCTCCTCAGAC  | 101 bp |
| Dmd    | CGTCTGAAGCAGCAGCATGAGCAT | GCAGCGAGGTAGAAGGAGAGGACA  | 280 bp |
| Actc1  | CTGGATTCTGGCGACGGTGTGACT | CGTTCAGCGGTGGTGACAAAGGAG  | 161 bp |

**Table S2. The primers of eIF5A1 DNA 5' areas for HRM analysis**

| NO. | Forward primer                                  | Reverse primer                       | Length |
|-----|-------------------------------------------------|--------------------------------------|--------|
| F1  | TAAGTAGGAAGGTTT <u>TT</u> TGAAA                 | <u>AAA</u> TAACCCTT <u>CA</u> ACT    | 261 bp |
| F2  | TG <u>TT</u> TGGTTGGT <u>T</u> AGTGGGG          | TCCCTTCT <u>A</u> CCCCCTCC           | 264bp  |
| F3  | <u>T</u> AGATAGGGTAAAGG <u>TTT</u> TTT          | <u>A</u> ACCCAAAAATAAATCTCTC         | 409 bp |
| F4  | AGAGAT <u>TTT</u> TAT <u>TTT</u> TGGGT <u>T</u> | CAACA <u>AAA</u> AAAA <u>CA</u> CTAA | 299 bp |

Underline means the cytosine has been converted to uracil by sodium bisulfite.

**Table S3. The primers of eIF5A1 DNA 5' areas for MeDIP analysis**

| NO. | Forward primer         | Reverse primer        | Length |
|-----|------------------------|-----------------------|--------|
| F1  | TAAGTAGGAAGGTTCTCTGAAA | AGGGTAACCCTTGCAGCT    | 261 bp |
| F2  | TGCTTGGTTGGTCAGTGGGG   | TCCCTTCTGCCCCCTCC     | 264bp  |
| F3  | CAGACAGGGCAAAGGCTCCT   | GACCCAAGGGTAGGGTCTCTC | 409 bp |
| F4  | AGAGACCCTACCCTTGGGTC   | CAACAGGGAAGGCACTGG    | 299 bp |

**Table S4. Determining the effective shRNA fragment of Map2k6 in PC12 cell line.**

| Group           | Mean  | Std. Error | P-value |
|-----------------|-------|------------|---------|
| Normal          | 0.161 | 0.011      | 1.000   |
| Control         | 0.147 | 0.016      |         |
| Map2k6-shRNA- 1 | 0.092 | 0.003      | 0.015   |
| Map2k6-shRNA- 2 | 0.088 | 0.006      | 0.006   |
| Map2k6-shRNA- 3 | 0.101 | 0.028      | 0.745   |
| Map2k6-shRNA- 4 | 0.177 | 0.052      | 1.000   |

The Map2k6 interference level was compared by RT-PCR, using  $\beta$ -actin as an internal control. Map2k6-shRNA- 2 produced a significant down-regulation compared with Control group (P=0.006).

**Table S5. The sequence information of eIF-5A1 and Map2k6 regulation lentiviruses vector.**

| Code name                      | Target Sequence                                                                                                                                                                                                                                                                                                                                                                                                                                                                                                                                                                                                                                                                                                                                                                                                                                                                          |
|--------------------------------|------------------------------------------------------------------------------------------------------------------------------------------------------------------------------------------------------------------------------------------------------------------------------------------------------------------------------------------------------------------------------------------------------------------------------------------------------------------------------------------------------------------------------------------------------------------------------------------------------------------------------------------------------------------------------------------------------------------------------------------------------------------------------------------------------------------------------------------------------------------------------------------|
| eIF-5A1-shRNA-lentivirus *     | GCAAGGAGATTGAGCAGAA                                                                                                                                                                                                                                                                                                                                                                                                                                                                                                                                                                                                                                                                                                                                                                                                                                                                      |
| Map2k6-shRNA-lentivirus *      | CTACAGTAGTTGACGAGATT                                                                                                                                                                                                                                                                                                                                                                                                                                                                                                                                                                                                                                                                                                                                                                                                                                                                     |
| Map2k6-expression-lentivirus * | ATGTCTCAGTCGAAAGGCAAGAAGCGAAACCCCGCCTTAAGA<br>TTCCAAGGGAAGCGTTTGAACAACCTCAGACCAGTTCCACGCCG<br>CCTCGGGATTTAGACTCCAAGGCTTGCATTTCTATTGGAAACCA<br>GAACTTTGAGGTGAAGGCCGATGACTTGGAGCCTATAGTGGAGC<br>TGGGACGAGGTGCGTACGGGGTGGTGGAGAAGATGCGTCACGT<br>GCCCAGCGGGCAGATCATGGCGGTGAAGCGGATACGGGCCACA<br>GTTAATAGCCAGGAGCAGAAACGGCTACTGATGGATCTGGATGT<br>TTCTATGAGGACAGTGGACTGTCCGTTTACCGTGACCTTCTATGG<br>TGCACTCTCCGGGAGGGCGATGTGTGGATCTGCATGGAGCTCA<br>TGGATACGTCACTAGATAAAATTCTACAAACAAGTTATTGATAAA<br>GGCCAAACAATTCCAGAAGATATCTTAGGGAAGATAGCAGTTTC<br>TATTGTAAGCATTAGAACATTTACACAGTAAGCTCTCTGTTA<br>TCCATCGAGATGTCAAGCCTTCAAATGTGCTCATTAACACGCTG<br>GGCCAAGTGAAGATGTGTGACTTTGGAATCAGCGGCTACCTGGT<br>AGACTCTGTTGCGAAAACGATCGATGCCGGTTGCAAACCATAACA<br>TGGCTCCTGAACGAATAAATCCAGAGCTCAACCAGAAGGGGTA<br>CAGTGTGAAGTCTGACATTTGGAGTCTGGGCATCACCATGATTG<br>AGCTGGCCATCCTCCGGTTTCCCTATGATTCTTGGGGAACGCCCT |

TCCAGCAGCTAAAACAGGTGGTAGAAGAGCCGTCTCCACAACCTC  
CCAGCGGACAAGTTCTCTGCTGACTTCGTTGACTTTACCTCACAG  
TGCTTGAAGAAAAATTCCAAAGAACGGCCCACGTATCCAGAGCT  
TATGCAACATCCATTTTTACCGTCCATGAAGCCAAAGCAGCAG  
ATGTGGCGTCTTTCGTAAAACCTGATACTCGGGGACTAG

---

\* eIF-5A1-shRNA-lentivirus, the lentiviruses vector could interfere mRNA of eIF-5A1 was produced by viral packaging system. This effective sequence was obtained from our preceding report. \*Map2k6-shRNA-lentivirus, the lentiviruses vector could interfere mRNA of Map2k6 was produced by viral packaging system. This is the most effective sequence code No.2 (Table S4.). \*Map2k6-expression-LV, the lentiviruses vector could expression mRNA of Map2k6 was produced by viral packaging system.



**Supplementary miRNA microarray information**

| Systematic Name  | Fold change | chr   | mirbase_accession_No |
|------------------|-------------|-------|----------------------|
| rno-let-7a-1-3p  | 44.63317711 | chr7  | MIMAT0017085         |
| rno-let-7a-5p    | 0.916283535 | chr8  | MIMAT0000774         |
| rno-let-7b-3p    | 45.38653041 | chr7  | MIMAT0004705         |
| rno-let-7b-5p    | 0.755545739 | chr7  | MIMAT0000775         |
| rno-let-7c-1-3p  | 0.95035801  | chr11 | MIMAT0017087         |
| rno-let-7c-5p    | 0.881316426 | chr7  | MIMAT0000776         |
| rno-let-7d-3p    | 98.31297324 | chr17 | MIMAT0000563         |
| rno-let-7d-5p    | 1           | chr17 | MIMAT0000562         |
| rno-let-7e-3p    | 0.95035801  | chr1  | MIMAT0004706         |
| rno-let-7e-5p    | 0.926435858 | chr1  | MIMAT0000777         |
| rno-let-7f-1-3p  | 0.95035801  | chr17 | MIMAT0017089         |
| rno-let-7f-2-3p  | 0.95035801  | chrX  | MIMAT0017090         |
| rno-let-7f-5p    | 0.936538365 | chr17 | MIMAT0000778         |
| rno-let-7i-3p    | 0.95035801  | chr7  | MIMAT0004707         |
| rno-let-7i-5p    | 1.052277344 | chr7  | MIMAT0000779         |
| rno-miR-1-3p     | 1           | chr18 | MIMAT0003125         |
| rno-miR-1-5p     | 0.95035801  | chr18 | MIMAT0003162         |
| rno-miR-100-3p   | 0.95035801  | chr8  | MIMAT0017112         |
| rno-miR-100-5p   | 0.947463979 | chr8  | MIMAT0000822         |
| rno-miR-101a-3p  | 1.425541461 | chr5  | MIMAT0000823         |
| rno-miR-101a-5p  | 0.95035801  | chr5  | MIMAT0004726         |
| rno-miR-101b-3p  | 1.1431545   | chr1  | MIMAT0000615         |
| rno-miR-101b-5p  | 0.95035801  | chr1  | MIMAT0017045         |
| rno-miR-103-1-5p | 0.95035801  | chr10 | MIMAT0017114         |
| rno-miR-103-2-5p | 0.95035801  | chr3  | MIMAT0017113         |
| rno-miR-103-3p   | 0.784177743 | chr3  | MIMAT0000824         |
| rno-miR-105      | 0.95035801  | chrX  | MIMAT0012825         |
| rno-miR-106b-3p  | 47.33581642 | chr12 | MIMAT0004727         |
| rno-miR-106b-5p  | 1.294586532 | chr12 | MIMAT0000825         |
| rno-miR-107-3p   | 1.1154795   | chr1  | MIMAT0000826         |
| rno-miR-107-5p   | 0.95035801  | chr1  | MIMAT0017115         |
| rno-miR-10a-3p   | 0.95035801  | chr10 | MIMAT0004709         |
| rno-miR-10a-5p   | 0.916943344 | chr10 | MIMAT0000782         |
| rno-miR-10b-3p   | 0.95035801  | chr3  | MIMAT0017092         |
| rno-miR-10b-5p   | 1.131512875 | chr3  | MIMAT0000783         |
| rno-miR-1188-3p  | 0.95035801  | chr6  | MIMAT0017855         |
| rno-miR-1188-5p  | 0.95035801  | chr6  | MIMAT0017854         |
| rno-miR-1193-3p  | 0.95035801  |       | MIMAT0017859         |
| rno-miR-1193-5p  | 0.95035801  |       | MIMAT0017858         |
| rno-miR-122-3p   | 0.95035801  | chr18 | MIMAT0017116         |
| rno-miR-122-5p   | 0.95035801  | chr18 | MIMAT0000827         |

---

|                   |             |       |              |
|-------------------|-------------|-------|--------------|
| rno-miR-1224      | 1.028686944 | chr11 | MIMAT0012827 |
| rno-miR-124-3p    | 0.95035801  | chr2  | MIMAT0000828 |
| rno-miR-124-5p    | 0.95035801  | chr2  | MIMAT0004728 |
| rno-miR-1249      | 1.537374027 | chr7  | MIMAT0017892 |
| rno-miR-125a-3p   | 1.096864032 | chr1  | MIMAT0004729 |
| rno-miR-125a-5p   | 1           | chr1  | MIMAT0000829 |
| rno-miR-125b-1-3p | 0.95035801  | chr8  | MIMAT0004730 |
| rno-miR-125b-2-3p | 61.968219   | chr11 | MIMAT0026467 |
| rno-miR-125b-5p   | 0.690715259 | chr8  | MIMAT0000830 |
| rno-miR-126a-3p   | 0.783594404 | chr3  | MIMAT0000832 |
| rno-miR-126a-5p   | 1           | chr3  | MIMAT0000831 |
| rno-miR-126b      | 0.95035801  | chr3  | MIMAT0017843 |
| rno-miR-127-3p    | 0.002903821 | chr6  | MIMAT0000833 |
| rno-miR-127-5p    | 0.95035801  | chr6  | MIMAT0017117 |
| rno-miR-128-1-5p  | 0.95035801  | chr13 | MIMAT0017118 |
| rno-miR-128-2-5p  | 0.95035801  | chr8  | MIMAT0017119 |
| rno-miR-128-3p    | 0.624645904 | chr8  | MIMAT0000834 |
| rno-miR-129-1-3p  | 0.95035801  | chr4  | MIMAT0017120 |
| rno-miR-129-2-3p  | 0.95035801  | chr3  | MIMAT0000601 |
| rno-miR-129-5p    | 0.95035801  | chr3  | MIMAT0000600 |
| rno-miR-1298      | 0.95035801  | chrX  | MIMAT0025060 |
| rno-miR-1306-3p   | 1.37153715  | chr11 | MIMAT0024852 |
| rno-miR-1306-5p   | 0.95035801  | chr11 | MIMAT0024851 |
| rno-miR-130a-3p   | 0.778767185 | chr3  | MIMAT0000836 |
| rno-miR-130a-5p   | 0.95035801  | chr3  | MIMAT0017121 |
| rno-miR-130b-3p   | 0.95035801  | chr11 | MIMAT0000837 |
| rno-miR-130b-5p   | 0.95035801  | chr11 | MIMAT0017122 |
| rno-miR-132-3p    | 0.95035801  | chr10 | MIMAT0000838 |
| rno-miR-132-5p    | 0.95035801  | chr10 | MIMAT0017123 |
| rno-miR-133a-3p   | 1.247887606 | chr18 | MIMAT0000839 |
| rno-miR-133a-5p   | 0.951981208 | chr18 | MIMAT0017124 |
| rno-miR-133b-3p   | 0.404179485 | chr9  | MIMAT0003126 |
| rno-miR-133b-5p   | 0.95035801  | chr9  | MIMAT0017205 |
| rno-miR-134-3p    | 0.95035801  | chr6  | MIMAT0017125 |
| rno-miR-134-5p    | 0.95035801  | chr6  | MIMAT0000840 |
| rno-miR-135a-3p   | 0.95035801  | chr7  | MIMAT0004732 |
| rno-miR-135a-5p   | 0.95035801  | chr7  | MIMAT0000841 |
| rno-miR-135b-3p   | 0.95035801  | chr13 | MIMAT0017043 |
| rno-miR-135b-5p   | 0.95035801  | chr13 | MIMAT0000611 |
| rno-miR-136-3p    | 0.008330714 | chr6  | MIMAT0004733 |
| rno-miR-136-5p    | 0.95035801  | chr6  | MIMAT0000842 |
| rno-miR-137-3p    | 0.95035801  | chr2  | MIMAT0000843 |
| rno-miR-137-5p    | 0.95035801  | chr2  | MIMAT0017126 |
| rno-miR-138-1-3p  | 0.95035801  | chr8  | MIMAT0004734 |

---

---

|                   |             |       |              |
|-------------------|-------------|-------|--------------|
| rno-miR-138-2-3p  | 0.95035801  | chr19 | MIMAT0017127 |
| rno-miR-138-5p    | 0.95035801  | chr8  | MIMAT0000844 |
| rno-miR-139-3p    | 1.104704874 | chr1  | MIMAT0004735 |
| rno-miR-139-5p    | 194.2667654 | chr1  | MIMAT0000845 |
| rno-miR-140-3p    | 1           | chr19 | MIMAT0000574 |
| rno-miR-140-5p    | 0.903843    | chr19 | MIMAT0000573 |
| rno-miR-141-3p    | 0.95035801  | chr4  | MIMAT0000846 |
| rno-miR-141-5p    | 0.95035801  | chr4  | MIMAT0017128 |
| rno-miR-142-3p    | 0.921095086 | chr10 | MIMAT0000848 |
| rno-miR-142-5p    | 0.95035801  | chr10 | MIMAT0000847 |
| rno-miR-143-3p    | 0.858888643 | chr18 | MIMAT0000849 |
| rno-miR-143-5p    | 0.95035801  | chr18 | MIMAT0017129 |
| rno-miR-144-3p    | 123.6892835 | chr10 | MIMAT0000850 |
| rno-miR-144-5p    | 0.95035801  | chr10 | MIMAT0017130 |
| rno-miR-145-3p    | 0.95035801  | chr18 | MIMAT0017131 |
| rno-miR-145-5p    | 0.96527124  | chr18 | MIMAT0000851 |
| rno-miR-146a-3p   | 0.95035801  | chr10 | MIMAT0017132 |
| rno-miR-146a-5p   | 0.887714089 | chr10 | MIMAT0000852 |
| rno-miR-146b-3p   | 0.95035801  | chr1  | MIMAT0017334 |
| rno-miR-146b-5p   | 0.662271463 | chr1  | MIMAT0005595 |
| rno-miR-147       | 0.95035801  | chr3  | MIMAT0005297 |
| rno-miR-148b-3p   | 0.70513725  | chr7  | MIMAT0000579 |
| rno-miR-148b-5p   | 0.95035801  | chr7  | MIMAT0004645 |
| rno-miR-150-3p    | 1.562544308 | chr1  | MIMAT0017133 |
| rno-miR-150-5p    | 0.817662284 | chr1  | MIMAT0000853 |
| rno-miR-151-3p    | 0.95035801  | chr7  | MIMAT0000614 |
| rno-miR-151-5p    | 1.099569656 | chr7  | MIMAT0000613 |
| rno-miR-152-3p    | 1.031679175 | chr10 | MIMAT0000854 |
| rno-miR-152-5p    | 0.95035801  | chr10 | MIMAT0017134 |
| rno-miR-153-3p    | 0.95035801  | chr6  | MIMAT0000855 |
| rno-miR-153-5p    | 0.95035801  | chr6  | MIMAT0017135 |
| rno-miR-154-3p    | 0.95035801  | chr6  | MIMAT0017136 |
| rno-miR-154-5p    | 0.007799823 | chr6  | MIMAT0000856 |
| rno-miR-15b-3p    | 0.95035801  | chr2  | MIMAT0017093 |
| rno-miR-15b-5p    | 0.732401829 | chr2  | MIMAT0000784 |
| rno-miR-16-3p     | 0.95035801  | chr2  | MIMAT0017094 |
| rno-miR-16-5p     | 0.861987588 | chr2  | MIMAT0000785 |
| rno-miR-17-1-3p   | 0.95035801  | chr15 | MIMAT0004710 |
| rno-miR-17-2-3p   | 0.95035801  | chrX  | MIMAT0017295 |
| rno-miR-17-5p     | 1.179616003 | chr15 | MIMAT0000786 |
| rno-miR-181a-1-3p | 0.95035801  | chr13 | MIMAT0000884 |
| rno-miR-181a-2-3p | 0.95035801  | chr3  | MIMAT0017138 |
| rno-miR-181a-5p   | 0.89302471  | chr3  | MIMAT0000858 |
| rno-miR-181b-1-3p | 0.95035801  | chr13 | MIMAT0017139 |

---

---

|                   |             |       |              |
|-------------------|-------------|-------|--------------|
| rno-miR-181b-2-3p | 0.95035801  | chr3  | MIMAT0017140 |
| rno-miR-181b-5p   | 1.015117691 | chr3  | MIMAT0000859 |
| rno-miR-181c-3p   | 0.95035801  | chr19 | MIMAT0017137 |
| rno-miR-181c-5p   | 0.95035801  | chr19 | MIMAT0000857 |
| rno-miR-181d-3p   | 0.95035801  | chr19 | MIMAT0017296 |
| rno-miR-181d-5p   | 0.95035801  | chr19 | MIMAT0005299 |
| rno-miR-182       | 0.95035801  | chr4  | MIMAT0005300 |
| rno-miR-183-3p    | 0.95035801  | chr4  | MIMAT0017141 |
| rno-miR-183-5p    | 0.95035801  | chr4  | MIMAT0000860 |
| rno-miR-1839-3p   | 139.7376429 | chr1  | MIMAT0024844 |
| rno-miR-1839-5p   | 1.693977485 | chr1  | MIMAT0024843 |
| rno-miR-184       | 0.95035801  | chr8  | MIMAT0000861 |
| rno-miR-1843-3p   | 0.95035801  | chr6  | MIMAT0024848 |
| rno-miR-1843-5p   | 0.95035801  | chr6  | MIMAT0024847 |
| rno-miR-185-3p    | 0.95035801  | chr11 | MIMAT0017142 |
| rno-miR-185-5p    | 1.055072399 | chr11 | MIMAT0000862 |
| rno-miR-186-3p    | 0.95035801  | chr2  | MIMAT0017143 |
| rno-miR-186-5p    | 1.156527042 | chr2  | MIMAT0000863 |
| rno-miR-187-3p    | 0.95035801  | chr18 | MIMAT0000864 |
| rno-miR-187-5p    | 0.95035801  | chr18 | MIMAT0017144 |
| rno-miR-188-3p    | 0.95035801  | chrX  | MIMAT0017297 |
| rno-miR-188-5p    | 1           | chrX  | MIMAT0005301 |
| rno-miR-18a-3p    | 0.95035801  | chr15 | MIMAT0017095 |
| rno-miR-18a-5p    | 0.95035801  | chr15 | MIMAT0000787 |
| rno-miR-190a-3p   | 0.95035801  | chr8  | MIMAT0017145 |
| rno-miR-190a-5p   | 0.95035801  | chr8  | MIMAT0000865 |
| rno-miR-190b-3p   | 0.95035801  | chr2  | MIMAT0017298 |
| rno-miR-190b-5p   | 0.95035801  | chr2  | MIMAT0005302 |
| rno-miR-1912-3p   | 0.95035801  | chrX  | MIMAT0017865 |
| rno-miR-1912-5p   | 0.95035801  | chrX  | MIMAT0017864 |
| rno-miR-191a-3p   | 0.708865538 | chr8  | MIMAT0017146 |
| rno-miR-191a-5p   | 0.95035801  | chr8  | MIMAT0000866 |
| rno-miR-191b      | 0.95035801  | chr8  | MIMAT0017817 |
| rno-miR-192-3p    | 0.95035801  | chr1  | MIMAT0017147 |
| rno-miR-192-5p    | 0.980729174 | chr1  | MIMAT0000867 |
| rno-miR-193-3p    | 1.480931592 | chr10 | MIMAT0000868 |
| rno-miR-193-5p    | 1.362405345 | chr10 | MIMAT0004736 |
| rno-miR-194-3p    | 0.95035801  | chr1  | MIMAT0017148 |
| rno-miR-194-5p    | 1.018258107 | chr1  | MIMAT0000869 |
| rno-miR-1949      | 0.756275454 | chr18 | MIMAT0017852 |
| rno-miR-195-3p    | 0.95035801  | chr10 | MIMAT0017149 |
| rno-miR-195-5p    | 0.753468968 | chr10 | MIMAT0000870 |
| rno-miR-196a-3p   | 0.95035801  | chr7  | MIMAT0004737 |
| rno-miR-196a-5p   | 1.042616069 | chr7  | MIMAT0000871 |

---

---

|                  |             |       |              |
|------------------|-------------|-------|--------------|
| rno-miR-196b-3p  | 0.95035801  | chr4  | MIMAT0017171 |
| rno-miR-196b-5p  | 0.976094883 | chr4  | MIMAT0001082 |
| rno-miR-196c-3p  | 0.95035801  | chr10 | MIMAT0017299 |
| rno-miR-196c-5p  | 1.086795653 | chr10 | MIMAT0005303 |
| rno-miR-199a-3p  | 0.896613421 | chr13 | MIMAT0004738 |
| rno-miR-199a-5p  | 1.128215373 | chr13 | MIMAT0000872 |
| rno-miR-19a-3p   | 1.196437637 | chr15 | MIMAT0000789 |
| rno-miR-19a-5p   | 0.95035801  | chr15 | MIMAT0017098 |
| rno-miR-19b-1-5p | 0.95035801  | chr15 | MIMAT0017096 |
| rno-miR-19b-2-5p | 0.95035801  | chrX  | MIMAT0017097 |
| rno-miR-19b-3p   | 0.968516411 | chr15 | MIMAT0000788 |
| rno-miR-200a-3p  | 0.95035801  | chr5  | MIMAT0000874 |
| rno-miR-200a-5p  | 0.95035801  | chr5  | MIMAT0017151 |
| rno-miR-200b-3p  | 0.95035801  | chr5  | MIMAT0000875 |
| rno-miR-200b-5p  | 0.95035801  | chr5  | MIMAT0017152 |
| rno-miR-200c-3p  | 0.95035801  | chr4  | MIMAT0000873 |
| rno-miR-200c-5p  | 0.95035801  | chr4  | MIMAT0017150 |
| rno-miR-201-3p   | 0.95035801  | chrX  | MIMAT0017364 |
| rno-miR-201-5p   | 0.95035801  | chrX  | MIMAT0012846 |
| rno-miR-202-3p   | 1.149983292 | chr1  | MIMAT0017355 |
| rno-miR-202-5p   | 0.95035801  | chr1  | MIMAT0012822 |
| rno-miR-203a-3p  | 0.95035801  | chr6  | MIMAT0000876 |
| rno-miR-203a-5p  | 0.95035801  | chr6  | MIMAT0017153 |
| rno-miR-203b-3p  | 0.95035801  | chr6  | MIMAT0017800 |
| rno-miR-203b-5p  | 0.95035801  | chr6  | MIMAT0017799 |
| rno-miR-204-3p   | 0.95035801  | chr1  | MIMAT0004739 |
| rno-miR-204-5p   | 1.142737787 | chr1  | MIMAT0000877 |
| rno-miR-205      | 0.95035801  | chr13 | MIMAT0000878 |
| rno-miR-206-3p   | 0.805209445 | chr9  | MIMAT0000879 |
| rno-miR-206-5p   | 0.95035801  | chr9  | MIMAT0017154 |
| rno-miR-207      | 0.95035801  | chr5  | MIMAT0003115 |
| rno-miR-208a-3p  | 0.95035801  | chr15 | MIMAT0000880 |
| rno-miR-208a-5p  | 121.8435355 | chr15 | MIMAT0017155 |
| rno-miR-208b-3p  | 0.95035801  | chr15 | MIMAT0017845 |
| rno-miR-208b-5p  | 0.95035801  | chr15 | MIMAT0017844 |
| rno-miR-20a-3p   | 0.95035801  | chr15 | MIMAT0000603 |
| rno-miR-20a-5p   | 0.963644752 | chr15 | MIMAT0000602 |
| rno-miR-20b-3p   | 0.95035801  | chrX  | MIMAT0003212 |
| rno-miR-20b-5p   | 1.102225034 | chrX  | MIMAT0003211 |
| rno-miR-21-3p    | 0.95035801  | chr10 | MIMAT0004711 |
| rno-miR-21-5p    | 0.960165497 | chr10 | MIMAT0000790 |
| rno-miR-210-3p   | 1.045395098 | chr1  | MIMAT0000881 |
| rno-miR-210-5p   | 0.95035801  | chr1  | MIMAT0017156 |
| rno-miR-211-3p   | 1.038058249 | chr1  | MIMAT0017157 |

---

---

|                   |             |       |              |
|-------------------|-------------|-------|--------------|
| rno-miR-211-5p    | 0.95035801  | chr1  | MIMAT0000882 |
| rno-miR-212-3p    | 1.306363783 | chr10 | MIMAT0000883 |
| rno-miR-212-5p    | 0.95035801  | chr10 | MIMAT0017158 |
| rno-miR-214-3p    | 0.967631674 | chr13 | MIMAT0000885 |
| rno-miR-214-5p    | 0.95035801  | chr13 | MIMAT0017159 |
| rno-miR-215       | 0.95035801  | chr13 | MIMAT0003118 |
| rno-miR-216a-3p   | 0.95035801  | chr14 | MIMAT0017160 |
| rno-miR-216a-5p   | 0.95035801  | chr14 | MIMAT0000886 |
| rno-miR-216b-3p   | 0.95035801  | chr14 | MIMAT0017847 |
| rno-miR-216b-5p   | 0.95035801  | chr14 | MIMAT0017846 |
| rno-miR-217-3p    | 0.95035801  | chr14 | MIMAT0017161 |
| rno-miR-217-5p    | 0.95035801  | chr14 | MIMAT0000887 |
| rno-miR-218a-1-3p | 0.95035801  | chr14 | MIMAT0017162 |
| rno-miR-218a-2-3p | 0.95035801  | chr10 | MIMAT0004740 |
| rno-miR-218a-5p   | 1.329541122 | chr10 | MIMAT0000888 |
| rno-miR-218b      | 0.95035801  | chr14 | MIMAT0017838 |
| rno-miR-219-1-3p  | 0.95035801  | chr20 | MIMAT0004741 |
| rno-miR-219-2-3p  | 0.95035801  | chr3  | MIMAT0005446 |
| rno-miR-219-5p    | 0.95035801  | chr3  | MIMAT0000889 |
| rno-miR-22-3p     | 0.91420968  | chr10 | MIMAT0000791 |
| rno-miR-22-5p     | 1.149592855 | chr10 | MIMAT0003152 |
| rno-miR-221-3p    | 0.875129606 | chrX  | MIMAT0000890 |
| rno-miR-221-5p    | 0.95035801  | chrX  | MIMAT0017163 |
| rno-miR-222-3p    | 0.95035801  | chrX  | MIMAT0000891 |
| rno-miR-222-5p    | 0.95035801  | chrX  | MIMAT0017164 |
| rno-miR-223-3p    | 0.836337641 | chrX  | MIMAT0000892 |
| rno-miR-223-5p    | 0.95035801  | chrX  | MIMAT0017165 |
| rno-miR-224-3p    | 0.95035801  | chrX  | MIMAT0017200 |
| rno-miR-224-5p    | 0.95035801  | chrX  | MIMAT0003119 |
| rno-miR-23a-3p    | 0.967043036 | chr19 | MIMAT0000792 |
| rno-miR-23a-5p    | 0.95035801  | chr19 | MIMAT0004712 |
| rno-miR-23b-3p    | 0.831277173 | chr17 | MIMAT0000793 |
| rno-miR-23b-5p    | 0.95035801  | chr17 | MIMAT0017099 |
| rno-miR-24-1-5p   | 0.95035801  | chr17 | MIMAT0003153 |
| rno-miR-24-2-5p   | 1.345090646 | chr19 | MIMAT0005441 |
| rno-miR-24-3p     | 0.871585741 | chr17 | MIMAT0000794 |
| rno-miR-25-3p     | 0.963635401 | chr12 | MIMAT0000795 |
| rno-miR-25-5p     | 0.95035801  | chr12 | MIMAT0004713 |
| rno-miR-26a-3p    | 0.95035801  | chr8  | MIMAT0017100 |
| rno-miR-26a-5p    | 1           | chr8  | MIMAT0000796 |
| rno-miR-26b-3p    | 0.95035801  | chr9  | MIMAT0004714 |
| rno-miR-26b-5p    | 1.433670015 | chr9  | MIMAT0000797 |
| rno-miR-27a-3p    | 1.066995432 | chr19 | MIMAT0000799 |
| rno-miR-27a-5p    | 0.95035801  | chr19 | MIMAT0004715 |

---

---

|                  |             |       |              |
|------------------|-------------|-------|--------------|
| rno-miR-27b-3p   | 1.125387622 | chr17 | MIMAT0000798 |
| rno-miR-27b-5p   | 0.95035801  | chr17 | MIMAT0017101 |
| rno-miR-28-3p    | 0.95035801  | chr11 | MIMAT0004716 |
| rno-miR-28-5p    | 1.041031916 | chr11 | MIMAT0000800 |
| rno-miR-290      | 0.981902513 | chr1  | MIMAT0000893 |
| rno-miR-291a-3p  | 0.95035801  | chr1  | MIMAT0000895 |
| rno-miR-291a-5p  | 0.95035801  | chr1  | MIMAT0000894 |
| rno-miR-291b     | 0.95035801  | chr1  | MIMAT0017822 |
| rno-miR-292-3p   | 0.95035801  | chr1  | MIMAT0000897 |
| rno-miR-292-5p   | 0.95035801  | chr1  | MIMAT0000896 |
| rno-miR-293-3p   | 0.95035801  | chr1  | MIMAT0017365 |
| rno-miR-293-5p   | 0.95035801  | chr1  | MIMAT0012847 |
| rno-miR-294      | 0.95035801  | chr1  | MIMAT0012848 |
| rno-miR-295-3p   | 0.95035801  | chr1  | MIMAT0017366 |
| rno-miR-295-5p   | 0.95035801  | chr1  | MIMAT0012849 |
| rno-miR-296-3p   | 0.95035801  | chr3  | MIMAT0004742 |
| rno-miR-296-5p   | 1.689129923 | chr3  | MIMAT0000898 |
| rno-miR-2964     | 0.95035801  | chr3  | MIMAT0017882 |
| rno-miR-297      | 0.95035801  | chr10 | MIMAT0000899 |
| rno-miR-298-3p   | 0.95035801  | chr3  | MIMAT0017166 |
| rno-miR-298-5p   | 0.95035801  | chr3  | MIMAT0000900 |
| rno-miR-2985     | 1.474206679 | chr2  | MIMAT0017891 |
| rno-miR-299a-3p  | 0.95035801  | chr6  | MIMAT0017167 |
| rno-miR-299a-5p  | 0.0037604   | chr6  | MIMAT0000901 |
| rno-miR-299b-3p  | 0.95035801  | chr6  | MIMAT0017834 |
| rno-miR-299b-5p  | 0.95035801  | chr6  | MIMAT0017833 |
| rno-miR-29a-3p   | 1.162694439 | chr4  | MIMAT0000802 |
| rno-miR-29a-5p   | 1.226902666 | chr4  | MIMAT0004718 |
| rno-miR-29b-1-5p | 0.95035801  | chr4  | MIMAT0005445 |
| rno-miR-29b-2-5p | 0.95035801  | chr13 | MIMAT0004717 |
| rno-miR-29b-3p   | 1.755775027 | chr4  | MIMAT0000801 |
| rno-miR-29c-3p   | 1.611248483 | chr13 | MIMAT0000803 |
| rno-miR-29c-5p   | 1.796914419 | chr13 | MIMAT0003154 |
| rno-miR-300-3p   | 0.00478863  | chr6  | MIMAT0000902 |
| rno-miR-300-5p   | 0.95035801  | chr6  | MIMAT0004743 |
| rno-miR-301a-3p  | 1.240018891 | chr10 | MIMAT0000552 |
| rno-miR-301a-5p  | 0.95035801  | chr10 | MIMAT0017026 |
| rno-miR-301b-3p  | 0.95035801  | chr11 | MIMAT0005304 |
| rno-miR-301b-5p  | 0.95035801  | chr11 | MIMAT0017300 |
| rno-miR-3065-3p  | 0.95035801  | chr10 | MIMAT0017840 |
| rno-miR-3065-5p  | 0.95035801  | chr10 | MIMAT0017839 |
| rno-miR-3068-3p  | 1.403149178 | chr6  | MIMAT0024846 |
| rno-miR-3068-5p  | 0.95035801  | chr6  | MIMAT0024845 |
| rno-miR-3072     | 0.95035801  | chr6  | MIMAT0025071 |

---

---

|                  |             |       |              |
|------------------|-------------|-------|--------------|
| rno-miR-3074     | 0.95035801  | chr17 | MIMAT0017815 |
| rno-miR-3075     | 0.95035801  | chr16 | MIMAT0025057 |
| rno-miR-3085     | 110.9029169 | chr1  | MIMAT0017805 |
| rno-miR-3099     | 0.95035801  | chr1  | MIMAT0025048 |
| rno-miR-30a-3p   | 1.181024587 | chr9  | MIMAT0000809 |
| rno-miR-30a-5p   | 1.139689637 | chr9  | MIMAT0000808 |
| rno-miR-30b-3p   | 1.106712124 | chr7  | MIMAT0004721 |
| rno-miR-30b-5p   | 1.257792554 | chr7  | MIMAT0000806 |
| rno-miR-30c-1-3p | 43.16537749 | chr5  | MIMAT0004719 |
| rno-miR-30c-2-3p | 1.240704631 | chr9  | MIMAT0005442 |
| rno-miR-30c-5p   | 1           | chr5  | MIMAT0000804 |
| rno-miR-30d-3p   | 88.7915573  | chr7  | MIMAT0004722 |
| rno-miR-30d-5p   | 1.046962668 | chr7  | MIMAT0000807 |
| rno-miR-30e-3p   | 1.217250421 | chr5  | MIMAT0004720 |
| rno-miR-30e-5p   | 1           | chr5  | MIMAT0000805 |
| rno-miR-3102     | 0.95035801  | chr1  | MIMAT0025051 |
| rno-miR-3120     | 0.95035801  | chr13 | MIMAT0017900 |
| rno-miR-31a-3p   | 0.95035801  | chr5  | MIMAT0017102 |
| rno-miR-31a-5p   | 0.95035801  | chr5  | MIMAT0000810 |
| rno-miR-31b      | 0.95035801  | chr5  | MIMAT0017816 |
| rno-miR-32-3p    | 0.95035801  | chr5  | MIMAT0017103 |
| rno-miR-32-5p    | 0.95035801  | chr5  | MIMAT0000811 |
| rno-miR-320-3p   | 0.938153305 | chr15 | MIMAT0000903 |
| rno-miR-320-5p   | 0.95035801  | chr15 | MIMAT0017168 |
| rno-miR-322-3p   | 0.007249088 | chrX  | MIMAT0000547 |
| rno-miR-322-5p   | 0.707125896 | chrX  | MIMAT0001619 |
| rno-miR-323-3p   | 0.95035801  | chr6  | MIMAT0000550 |
| rno-miR-323-5p   | 0.95035801  | chr6  | MIMAT0004637 |
| rno-miR-324-3p   | 1.197608528 | chr10 | MIMAT0000554 |
| rno-miR-324-5p   | 1.395843696 | chr10 | MIMAT0000553 |
| rno-miR-325-3p   | 0.95035801  | chrX  | MIMAT0004639 |
| rno-miR-325-5p   | 0.95035801  | chrX  | MIMAT0000557 |
| rno-miR-326-3p   | 0.95035801  | chr1  | MIMAT0000560 |
| rno-miR-326-5p   | 0.95035801  | chr1  | MIMAT0017028 |
| rno-miR-327      | 0.95035801  |       | MIMAT0000561 |
| rno-miR-328a-3p  | 1.068722798 | chr19 | MIMAT0000564 |
| rno-miR-328a-5p  | 0.954054905 | chr19 | MIMAT0017029 |
| rno-miR-328b-3p  | 0.95035801  | chr14 | MIMAT0017904 |
| rno-miR-329-3p   | 0.00242543  | chr6  | MIMAT0000566 |
| rno-miR-329-5p   | 0.95035801  | chr6  | MIMAT0017031 |
| rno-miR-33-3p    | 0.95035801  | chr7  | MIMAT0017104 |
| rno-miR-33-5p    | 85.12649353 | chr7  | MIMAT0000812 |
| rno-miR-330-3p   | 0.95035801  | chr1  | MIMAT0000568 |
| rno-miR-330-5p   | 0.95035801  | chr1  | MIMAT0004641 |

---



---

|                   |             |       |              |
|-------------------|-------------|-------|--------------|
| rno-miR-331-3p    | 1.516131616 | chr7  | MIMAT0000570 |
| rno-miR-331-5p    | 0.95035801  | chr7  | MIMAT0017033 |
| rno-miR-335       | 0.452623846 |       | MIMAT0000575 |
| rno-miR-336-3p    | 0.95035801  | chr10 | MIMAT0017034 |
| rno-miR-336-5p    | 0.95035801  | chr10 | MIMAT0000576 |
| rno-miR-337-3p    | 0.004892026 | chr6  | MIMAT0000577 |
| rno-miR-337-5p    | 0.95035801  | chr6  | MIMAT0017035 |
| rno-miR-338-3p    | 0.715164981 | chr10 | MIMAT0000581 |
| rno-miR-338-5p    | 0.95035801  | chr10 | MIMAT0004646 |
| rno-miR-339-3p    | 1.346526852 | chr12 | MIMAT0004648 |
| rno-miR-339-5p    | 0.95035801  | chr12 | MIMAT0000583 |
| rno-miR-340-3p    | 119.9216726 |       | MIMAT0000585 |
| rno-miR-340-5p    | 1.821678416 |       | MIMAT0004650 |
| rno-miR-341       | 0.95035801  | chr6  | MIMAT0000587 |
| rno-miR-342-3p    | 0.558513361 | chr6  | MIMAT0000589 |
| rno-miR-342-5p    | 0.95035801  | chr6  | MIMAT0004652 |
| rno-miR-343       | 0.95035801  | chr1  | MIMAT0000591 |
| rno-miR-344a      | 0.95035801  | chr1  | MIMAT0017842 |
| rno-miR-344a-3p   | 0.95035801  | chr1  | MIMAT0000592 |
| rno-miR-344a-5p   | 0.95035801  | chr1  | MIMAT0004654 |
| rno-miR-344b-2-3p | 0.95035801  | chr1  | MIMAT0017812 |
| rno-miR-344b-5p   | 0.95035801  | chr1  | MIMAT0017811 |
| rno-miR-344g      | 0.95035801  | chr1  | MIMAT0025052 |
| rno-miR-344i      | 0.95035801  | chr1  | MIMAT0025049 |
| rno-miR-345-3p    | 0.95035801  | chr6  | MIMAT0004655 |
| rno-miR-345-5p    | 1.094206628 | chr6  | MIMAT0000594 |
| rno-miR-346       | 0.95035801  | chr16 | MIMAT0000596 |
| rno-miR-347       | 1.870594953 |       | MIMAT0000598 |
| rno-miR-3473      | 0.709429388 | chr13 | MIMAT0024853 |
| rno-miR-349       | 0.95035801  | chr7  | MIMAT0000599 |
| rno-miR-34a-3p    | 0.95035801  | chr5  | MIMAT0017106 |
| rno-miR-34a-5p    | 0.931489557 | chr5  | MIMAT0000815 |
| rno-miR-34b-3p    | 0.95035801  | chr8  | MIMAT0017105 |
| rno-miR-34b-5p    | 0.95035801  | chr8  | MIMAT0000813 |
| rno-miR-34c-3p    | 0.95035801  | chr8  | MIMAT0004723 |
| rno-miR-34c-5p    | 0.95035801  | chr8  | MIMAT0000814 |
| rno-miR-350       | 1.034029826 | chr13 | MIMAT0000604 |
| rno-miR-351-3p    | 0.95035801  | chrX  | MIMAT0017041 |
| rno-miR-351-5p    | 0.95035801  | chrX  | MIMAT0000608 |
| rno-miR-352       | 1.166347349 |       | MIMAT0000610 |
| rno-miR-3541      | 0.95035801  | chr2  | MIMAT0017795 |
| rno-miR-3542      | 0.95035801  | chr17 | MIMAT0017796 |
| rno-miR-3543      | 0.95035801  | chr6  | MIMAT0017797 |
| rno-miR-3544      | 0.95035801  | chr6  | MIMAT0017798 |

---

---

|                 |             |       |              |
|-----------------|-------------|-------|--------------|
| rno-miR-3546    | 1.159624726 | chr15 | MIMAT0017801 |
| rno-miR-3547    | 0.95035801  | chr10 | MIMAT0017802 |
| rno-miR-3548    | 0.95035801  | chr5  | MIMAT0017806 |
| rno-miR-3549    | 0.95035801  | chr10 | MIMAT0017807 |
| rno-miR-3550    | 0.95035801  | chr19 | MIMAT0017808 |
| rno-miR-3551-3p | 0.95035801  | chrX  | MIMAT0017810 |
| rno-miR-3551-5p | 0.95035801  | chrX  | MIMAT0017809 |
| rno-miR-3552    | 0.95035801  | chrX  | MIMAT0017813 |
| rno-miR-3553    | 0.95035801  | chr4  | MIMAT0017814 |
| rno-miR-3556a   | 0.95035801  | chr4  | MIMAT0017821 |
| rno-miR-3556b   | 0.95035801  | chr13 | MIMAT0017818 |
| rno-miR-3557-3p | 0.95035801  | chr18 | MIMAT0017820 |
| rno-miR-3557-5p | 0.95035801  | chr18 | MIMAT0017819 |
| rno-miR-3558-3p | 0.95035801  | chr6  | MIMAT0017826 |
| rno-miR-3558-5p | 0.95035801  | chr6  | MIMAT0017825 |
| rno-miR-3559-3p | 0.95035801  | chrX  | MIMAT0017828 |
| rno-miR-3559-5p | 0.95035801  | chrX  | MIMAT0017827 |
| rno-miR-3560    | 0.95035801  | chrX  | MIMAT0017829 |
| rno-miR-3561-3p | 0.95035801  | chr7  | MIMAT0017831 |
| rno-miR-3561-5p | 0.95035801  | chr7  | MIMAT0017830 |
| rno-miR-3562    | 178.8827299 | chr10 | MIMAT0017832 |
| rno-miR-3564    | 0.95035801  | chr19 | MIMAT0017837 |
| rno-miR-3566    | 0.95035801  | chr17 | MIMAT0017841 |
| rno-miR-3568    | 0.95035801  | chr10 | MIMAT0017848 |
| rno-miR-3569    | 0.95035801  | chr1  | MIMAT0017849 |
| rno-miR-3570    | 0.95035801  | chr13 | MIMAT0017850 |
| rno-miR-3571    | 0.95035801  | chr18 | MIMAT0017851 |
| rno-miR-3572    | 0.95035801  | chr1  | MIMAT0017853 |
| rno-miR-3573-3p | 105.724476  | chrX  | MIMAT0017857 |
| rno-miR-3573-5p | 0.95035801  | chrX  | MIMAT0017856 |
| rno-miR-3574    | 0.95035801  | chr1  | MIMAT0017860 |
| rno-miR-3575    | 0.95035801  | chr4  | MIMAT0017861 |
| rno-miR-3576    | 0.95035801  | chr6  | MIMAT0017862 |
| rno-miR-3577    | 0.95035801  | chr10 | MIMAT0017863 |
| rno-miR-3578    | 0.95035801  | chr6  | MIMAT0017866 |
| rno-miR-3579    | 0.95035801  | chr6  | MIMAT0017867 |
| rno-miR-3580-3p | 0.95035801  | chrX  | MIMAT0017869 |
| rno-miR-3580-5p | 0.95035801  | chrX  | MIMAT0017868 |
| rno-miR-3582    | 0.95035801  | chr18 | MIMAT0017872 |
| rno-miR-3583-3p | 0.95035801  | chr5  | MIMAT0017874 |
| rno-miR-3583-5p | 0.95035801  | chr5  | MIMAT0017873 |
| rno-miR-3584-3p | 0.95035801  | chr1  | MIMAT0017876 |
| rno-miR-3584-5p | 0.816155411 | chr1  | MIMAT0017875 |
| rno-miR-3585-3p | 0.95035801  | chrX  | MIMAT0017879 |

---

---

|                 |             |       |              |
|-----------------|-------------|-------|--------------|
| rno-miR-3585-5p | 0.95035801  | chrX  | MIMAT0017878 |
| rno-miR-3586-3p | 0.95035801  | chr7  | MIMAT0017881 |
| rno-miR-3586-5p | 0.95035801  | chr7  | MIMAT0017880 |
| rno-miR-3587    | 0.95035801  | chr4  | MIMAT0017883 |
| rno-miR-3588    | 1.793190672 | chr11 | MIMAT0017887 |
| rno-miR-3589    | 0.95035801  | chrX  | MIMAT0017888 |
| rno-miR-3590-3p | 0.95035801  | chr3  | MIMAT0017890 |
| rno-miR-3590-5p | 0.95035801  | chr3  | MIMAT0017889 |
| rno-miR-3591    | 0.95035801  | chr18 | MIMAT0017893 |
| rno-miR-3592    | 0.95035801  | chr6  | MIMAT0017895 |
| rno-miR-3593-3p | 1.167307779 | chr6  | MIMAT0017897 |
| rno-miR-3593-5p | 0.95035801  | chr6  | MIMAT0017896 |
| rno-miR-3594-3p | 0.95035801  | chr10 | MIMAT0017899 |
| rno-miR-3594-5p | 0.95035801  | chr10 | MIMAT0017898 |
| rno-miR-3595    | 0.95035801  | chr6  | MIMAT0017903 |
| rno-miR-3596a   | 0.95035801  | chr8  | MIMAT0017886 |
| rno-miR-3596b   | 0.95035801  | chr17 | MIMAT0017871 |
| rno-miR-3596c   | 0.95035801  | chr1  | MIMAT0017877 |
| rno-miR-3596d   | 0.95035801  | chr17 | MIMAT0017823 |
| rno-miR-361-3p  | 0.95035801  | chrX  | MIMAT0017199 |
| rno-miR-361-5p  | 1.164171093 | chrX  | MIMAT0003117 |
| rno-miR-362-3p  | 0.429352025 | chrX  | MIMAT0017357 |
| rno-miR-362-5p  | 0.95035801  | chrX  | MIMAT0012828 |
| rno-miR-363-3p  | 0.95035801  | chrX  | MIMAT0003210 |
| rno-miR-363-5p  | 0.95035801  | chrX  | MIMAT0003209 |
| rno-miR-365-3p  | 1.220758226 | chr10 | MIMAT0001549 |
| rno-miR-365-5p  | 0.95035801  | chr10 | MIMAT0017184 |
| rno-miR-369-3p  | 0.95035801  | chr6  | MIMAT0003207 |
| rno-miR-369-5p  | 0.95035801  | chr6  | MIMAT0003206 |
| rno-miR-370-3p  | 1.058599223 | chr6  | MIMAT0003122 |
| rno-miR-370-5p  | 0.95035801  | chr6  | MIMAT0017202 |
| rno-miR-374-3p  | 0.95035801  | chrX  | MIMAT0017223 |
| rno-miR-374-5p  | 1.198401554 | chrX  | MIMAT0003208 |
| rno-miR-375-3p  | 0.95035801  | chr9  | MIMAT0005307 |
| rno-miR-375-5p  | 0.95035801  | chr9  | MIMAT0017301 |
| rno-miR-376a-3p | 0.95035801  | chr6  | MIMAT0003198 |
| rno-miR-376a-5p | 0.95035801  | chr6  | MIMAT0003197 |
| rno-miR-376b-3p | 0.95035801  | chr6  | MIMAT0003196 |
| rno-miR-376b-5p | 0.95035801  | chr6  | MIMAT0003195 |
| rno-miR-376c-3p | 0.95035801  | chr6  | MIMAT0003194 |
| rno-miR-376c-5p | 0.95035801  | chr6  | MIMAT0017219 |
| rno-miR-377-3p  | 0.95035801  | chr6  | MIMAT0003123 |
| rno-miR-377-5p  | 0.95035801  | chr6  | MIMAT0017203 |
| rno-miR-378a-5p | 1.042217222 | chr18 | MIMAT0003378 |

---

---

|                 |             |       |              |
|-----------------|-------------|-------|--------------|
| rno-miR-378b    | 1           | chr5  | MIMAT0024855 |
| rno-miR-379-3p  | 0.95035801  | chr6  | MIMAT0004791 |
| rno-miR-379-5p  | 0.95035801  | chr6  | MIMAT0003192 |
| rno-miR-380-3p  | 0.95035801  | chr6  | MIMAT0017302 |
| rno-miR-380-5p  | 0.95035801  | chr6  | MIMAT0005308 |
| rno-miR-381-3p  | 0.006003316 | chr6  | MIMAT0003199 |
| rno-miR-381-5p  | 0.95035801  | chr6  | MIMAT0017220 |
| rno-miR-382-3p  | 0.95035801  | chr6  | MIMAT0003202 |
| rno-miR-382-5p  | 0.007369321 | chr6  | MIMAT0003201 |
| rno-miR-383-3p  | 0.95035801  | chr16 | MIMAT0017197 |
| rno-miR-383-5p  | 0.95035801  | chr16 | MIMAT0003114 |
| rno-miR-384-3p  | 0.95035801  | chrX  | MIMAT0005310 |
| rno-miR-384-5p  | 0.95035801  | chrX  | MIMAT0005309 |
| rno-miR-409a-3p | 0.95035801  | chr6  | MIMAT0003205 |
| rno-miR-409a-5p | 0.95035801  | chr6  | MIMAT0003204 |
| rno-miR-409b    | 0.95035801  | chr6  | MIMAT0017870 |
| rno-miR-410-3p  | 0.95035801  | chr6  | MIMAT0005311 |
| rno-miR-410-5p  | 0.95035801  | chr6  | MIMAT0017303 |
| rno-miR-411-3p  | 0.95035801  | chr6  | MIMAT0017304 |
| rno-miR-411-5p  | 0.95035801  | chr6  | MIMAT0005312 |
| rno-miR-412-3p  | 0.95035801  | chr6  | MIMAT0003124 |
| rno-miR-412-5p  | 0.95035801  | chr6  | MIMAT0017204 |
| rno-miR-421-3p  | 0.95035801  | chrX  | MIMAT0017175 |
| rno-miR-421-5p  | 0.95035801  | chrX  | MIMAT0001320 |
| rno-miR-423-3p  | 0.95035801  | chr10 | MIMAT0005313 |
| rno-miR-423-5p  | 1           | chr10 | MIMAT0017305 |
| rno-miR-425-3p  | 0.95035801  | chr8  | MIMAT0017306 |
| rno-miR-425-5p  | 1           | chr8  | MIMAT0005314 |
| rno-miR-429     | 0.95035801  | chr5  | MIMAT0001538 |
| rno-miR-431     | 0.95035801  | chr6  | MIMAT0001626 |
| rno-miR-433-3p  | 0.95035801  | chr6  | MIMAT0001628 |
| rno-miR-433-5p  | 0.95035801  | chr6  | MIMAT0017192 |
| rno-miR-434-3p  | 0.001573271 | chr6  | MIMAT0005315 |
| rno-miR-434-5p  | 0.95035801  | chr6  | MIMAT0017307 |
| rno-miR-448-3p  | 0.95035801  | chrX  | MIMAT0001534 |
| rno-miR-448-5p  | 0.95035801  | chrX  | MIMAT0017177 |
| rno-miR-449a-3p | 0.95035801  | chr2  | MIMAT0017181 |
| rno-miR-449a-5p | 0.95035801  | chr2  | MIMAT0001543 |
| rno-miR-449c-3p | 0.95035801  | chr2  | MIMAT0017804 |
| rno-miR-449c-5p | 0.95035801  | chr2  | MIMAT0017803 |
| rno-miR-450a-3p | 0.95035801  | chrX  | MIMAT0017183 |
| rno-miR-450a-5p | 0.621707203 | chrX  | MIMAT0001547 |
| rno-miR-451-3p  | 0.95035801  | chr10 | MIMAT0017193 |
| rno-miR-451-5p  | 0.726341844 | chr10 | MIMAT0001633 |

---

---

|                   |             |       |              |
|-------------------|-------------|-------|--------------|
| rno-miR-455-3p    | 0.95035801  | chr5  | MIMAT0017308 |
| rno-miR-455-5p    | 0.95035801  | chr5  | MIMAT0005316 |
| rno-miR-463-3p    | 0.95035801  | chrX  | MIMAT0005317 |
| rno-miR-463-5p    | 0.95035801  | chrX  | MIMAT0017309 |
| rno-miR-465-3p    | 0.95035801  | chrX  | MIMAT0017367 |
| rno-miR-465-5p    | 0.95035801  | chrX  | MIMAT0012850 |
| rno-miR-466b-1-3p | 1.018277658 | chr17 | MIMAT0017285 |
| rno-miR-466b-2-3p | 0.95035801  | chr17 | MIMAT0017286 |
| rno-miR-466b-5p   | 0.884892496 | chr17 | MIMAT0005278 |
| rno-miR-466c-3p   | 0.95035801  | chr17 | MIMAT0017287 |
| rno-miR-466c-5p   | 0.95035801  | chr17 | MIMAT0005279 |
| rno-miR-466d      | 0.95035801  | chr17 | MIMAT0017824 |
| rno-miR-471-3p    | 0.95035801  | chrX  | MIMAT0017310 |
| rno-miR-471-5p    | 0.95035801  | chrX  | MIMAT0005318 |
| rno-miR-483-3p    | 1.85523636  | chr1  | MIMAT0003121 |
| rno-miR-483-5p    | 1.026217477 | chr1  | MIMAT0017201 |
| rno-miR-484       | 0.95035801  | chr10 | MIMAT0005319 |
| rno-miR-485-3p    | 0.95035801  | chr6  | MIMAT0017222 |
| rno-miR-485-5p    | 0.95035801  | chr6  | MIMAT0003203 |
| rno-miR-487b-3p   | 0.932461652 | chr6  | MIMAT0003200 |
| rno-miR-487b-5p   | 0.95035801  | chr6  | MIMAT0017221 |
| rno-miR-488-3p    | 0.95035801  | chr13 | MIMAT0005341 |
| rno-miR-488-5p    | 0.95035801  | chr13 | MIMAT0017320 |
| rno-miR-489-3p    | 0.95035801  | chr4  | MIMAT0003113 |
| rno-miR-489-5p    | 0.95035801  | chr4  | MIMAT0017196 |
| rno-miR-490-3p    | 0.95035801  | chr4  | MIMAT0012823 |
| rno-miR-490-5p    | 0.95035801  | chr4  | MIMAT0017356 |
| rno-miR-493-3p    | 0.95035801  | chr6  | MIMAT0003191 |
| rno-miR-493-5p    | 0.95035801  | chr6  | MIMAT0017217 |
| rno-miR-494-3p    | 1.227892278 | chr6  | MIMAT0003193 |
| rno-miR-494-5p    | 0.95035801  | chr6  | MIMAT0017218 |
| rno-miR-495       | 0.95035801  | chr6  | MIMAT0005320 |
| rno-miR-496-3p    | 0.95035801  | chr6  | MIMAT0012860 |
| rno-miR-496-5p    | 0.95035801  | chr6  | MIMAT0017372 |
| rno-miR-497-3p    | 0.95035801  | chr10 | MIMAT0017230 |
| rno-miR-497-5p    | 0.743481629 | chr10 | MIMAT0003383 |
| rno-miR-499-3p    | 0.95035801  | chr3  | MIMAT0017227 |
| rno-miR-499-5p    | 0.20067308  | chr3  | MIMAT0003381 |
| rno-miR-500-3p    | 0.642175754 | chrX  | MIMAT0005321 |
| rno-miR-500-5p    | 0.95035801  | chrX  | MIMAT0017311 |
| rno-miR-501-3p    | 0.95035801  | chrX  | MIMAT0017198 |
| rno-miR-501-5p    | 0.95035801  | chrX  | MIMAT0003116 |
| rno-miR-503-3p    | 0.95035801  | chrX  | MIMAT0017224 |
| rno-miR-503-5p    | 0.008111718 | chrX  | MIMAT0003213 |

---

---

|                 |             |       |              |
|-----------------|-------------|-------|--------------|
| rno-miR-504     | 0.95035801  | chrX  | MIMAT0012830 |
| rno-miR-505-3p  | 1.131993206 | chrX  | MIMAT0003380 |
| rno-miR-505-5p  | 0.95035801  | chrX  | MIMAT0017226 |
| rno-miR-509-3p  | 0.95035801  | chrX  | MIMAT0024850 |
| rno-miR-509-5p  | 0.95035801  | chrX  | MIMAT0024849 |
| rno-miR-511-3p  | 133.1238083 | chr17 | MIMAT0017358 |
| rno-miR-511-5p  | 0.95035801  | chr17 | MIMAT0012829 |
| rno-miR-532-3p  | 0.007138903 | chrX  | MIMAT0005323 |
| rno-miR-532-5p  | 0.522582348 | chrX  | MIMAT0005322 |
| rno-miR-539-3p  | 0.95035801  | chr6  | MIMAT0017212 |
| rno-miR-539-5p  | 0.009666659 | chr6  | MIMAT0003176 |
| rno-miR-540-3p  | 0.95035801  | chr6  | MIMAT0003174 |
| rno-miR-540-5p  | 0.95035801  | chr6  | MIMAT0017211 |
| rno-miR-541-3p  | 0.95035801  | chr6  | MIMAT0017213 |
| rno-miR-541-5p  | 0.95035801  | chr6  | MIMAT0003177 |
| rno-miR-542-3p  | 0.95035801  | chrX  | MIMAT0003179 |
| rno-miR-542-5p  | 0.95035801  | chrX  | MIMAT0003178 |
| rno-miR-543-3p  | 0.95035801  | chr6  | MIMAT0003175 |
| rno-miR-543-5p  | 0.95035801  | chr6  | MIMAT0004787 |
| rno-miR-544-3p  | 0.95035801  | chr6  | MIMAT0012831 |
| rno-miR-544-5p  | 0.95035801  | chr6  | MIMAT0017359 |
| rno-miR-547-3p  | 0.95035801  | chrX  | MIMAT0012851 |
| rno-miR-547-5p  | 0.95035801  | chrX  | MIMAT0017368 |
| rno-miR-551b-3p | 0.95035801  | chr2  | MIMAT0005596 |
| rno-miR-551b-5p | 108.9579005 | chr2  | MIMAT0017335 |
| rno-miR-568     | 0.95035801  | chr11 | MIMAT0012832 |
| rno-miR-582-3p  | 0.95035801  | chr2  | MIMAT0017360 |
| rno-miR-582-5p  | 0.95035801  | chr2  | MIMAT0012833 |
| rno-miR-592     | 0.95035801  | chr4  | MIMAT0012834 |
| rno-miR-598-3p  | 0.95035801  | chr15 | MIMAT0005325 |
| rno-miR-598-5p  | 0.95035801  | chr15 | MIMAT0005324 |
| rno-miR-615     | 0.95035801  | chr7  | MIMAT0012835 |
| rno-miR-6215    | 1.229728643 | chr5  | MIMAT0024854 |
| rno-miR-6216    | 1.052517995 | chr3  | MIMAT0024856 |
| rno-miR-628     | 0.95035801  | chr8  | MIMAT0012836 |
| rno-miR-6314    | 0.95035801  | chr2  | MIMAT0025047 |
| rno-miR-6315    | 1.627792831 | chr1  | MIMAT0025050 |
| rno-miR-6316    | 0.95035801  | chr1  | MIMAT0025053 |
| rno-miR-6317    | 0.95035801  | chr1  | MIMAT0025054 |
| rno-miR-6318    | 0.95035801  | chr19 | MIMAT0025055 |
| rno-miR-6319    | 0.95035801  | chr17 | MIMAT0025056 |
| rno-miR-632     | 0.95035801  | chr10 | MIMAT0012837 |
| rno-miR-6320    | 0.95035801  | chr15 | MIMAT0025058 |
| rno-miR-6321    | 0.95035801  | chr14 | MIMAT0025059 |

---

---

|                  |             |       |              |
|------------------|-------------|-------|--------------|
| rno-miR-6322     | 0.95035801  | chr12 | MIMAT0025061 |
| rno-miR-6323     | 0.95035801  | chr11 | MIMAT0025062 |
| rno-miR-6324     | 0.95035801  | chr11 | MIMAT0025063 |
| rno-miR-6325     | 0.95035801  | chr11 | MIMAT0025064 |
| rno-miR-6326     | 0.95035801  | chr10 | MIMAT0025065 |
| rno-miR-6327     | 0.95035801  | chr10 | MIMAT0025066 |
| rno-miR-6328     | 136.1617147 | chr20 | MIMAT0025067 |
| rno-miR-6329     | 0.95035801  | chr8  | MIMAT0025068 |
| rno-miR-6330     | 0.95035801  | chr8  | MIMAT0025069 |
| rno-miR-6331     | 0.95035801  | chr6  | MIMAT0025070 |
| rno-miR-6332     | 0.95035801  | chr5  | MIMAT0025073 |
| rno-miR-6333     | 0.95035801  | chr5  | MIMAT0025074 |
| rno-miR-6334     | 0.95035801  | chr3  | MIMAT0025075 |
| rno-miR-652-3p   | 0.896299626 | chrX  | MIMAT0005342 |
| rno-miR-652-5p   | 1.313351878 | chrX  | MIMAT0017321 |
| rno-miR-653-3p   | 0.95035801  | chr4  | MIMAT0017361 |
| rno-miR-653-5p   | 0.95035801  | chr4  | MIMAT0012838 |
| rno-miR-664-1-5p | 0.95035801  | chr18 | MIMAT0017228 |
| rno-miR-664-2-5p | 0.95035801  | chr13 | MIMAT0017229 |
| rno-miR-664-3p   | 1.417769009 | chr13 | MIMAT0003382 |
| rno-miR-665      | 0.95035801  | chr6  | MIMAT0012844 |
| rno-miR-666-3p   | 0.95035801  | chr6  | MIMAT0017371 |
| rno-miR-666-5p   | 0.95035801  | chr6  | MIMAT0012855 |
| rno-miR-667-3p   | 0.95035801  | chr6  | MIMAT0012852 |
| rno-miR-667-5p   | 0.95035801  | chr6  | MIMAT0017369 |
| rno-miR-668      | 0.95035801  | chr6  | MIMAT0012839 |
| rno-miR-671      | 0.95035801  | chr4  | MIMAT0005326 |
| rno-miR-672-3p   | 0.95035801  | chrX  | MIMAT0017312 |
| rno-miR-672-5p   | 0.95035801  | chrX  | MIMAT0005327 |
| rno-miR-673-3p   | 0.95035801  | chr6  | MIMAT0017313 |
| rno-miR-673-5p   | 0.95035801  | chr6  | MIMAT0005328 |
| rno-miR-674-3p   | 0.011164069 | chr3  | MIMAT0005330 |
| rno-miR-674-5p   | 0.95035801  | chr3  | MIMAT0005329 |
| rno-miR-675-3p   | 1.601520206 | chr1  | MIMAT0017363 |
| rno-miR-675-5p   | 0.95035801  | chr1  | MIMAT0012841 |
| rno-miR-678      | 0.95035801  | chr20 | MIMAT0012857 |
| rno-miR-679      | 0.95035801  | chr6  | MIMAT0025072 |
| rno-miR-702-3p   | 0.901690046 | chr12 | MIMAT0017885 |
| rno-miR-702-5p   | 0.95035801  | chr12 | MIMAT0017884 |
| rno-miR-708-3p   | 0.95035801  | chr1  | MIMAT0005332 |
| rno-miR-708-5p   | 0.95035801  | chr1  | MIMAT0005331 |
| rno-miR-711      | 0.95035801  | chr8  | MIMAT0012859 |
| rno-miR-741-3p   | 0.95035801  | chrX  | MIMAT0017902 |
| rno-miR-741-5p   | 0.95035801  | chrX  | MIMAT0017901 |

---

---

|                  |             |       |              |
|------------------|-------------|-------|--------------|
| rno-miR-742-3p   | 0.95035801  | chrX  | MIMAT0005333 |
| rno-miR-742-5p   | 0.95035801  | chrX  | MIMAT0017314 |
| rno-miR-743a-3p  | 0.95035801  | chrX  | MIMAT0005334 |
| rno-miR-743a-5p  | 0.95035801  | chrX  | MIMAT0017315 |
| rno-miR-743b-3p  | 0.95035801  | chrX  | MIMAT0005280 |
| rno-miR-743b-5p  | 0.95035801  | chrX  | MIMAT0017288 |
| rno-miR-758-3p   | 0.95035801  | chr6  | MIMAT0005335 |
| rno-miR-758-5p   | 0.95035801  | chr6  | MIMAT0017316 |
| rno-miR-759      | 0.95035801  | chr15 | MIMAT0012856 |
| rno-miR-760-3p   | 0.95035801  | chr2  | MIMAT0005337 |
| rno-miR-760-5p   | 0.95035801  | chr2  | MIMAT0005336 |
| rno-miR-761      | 0.95035801  | chr5  | MIMAT0012853 |
| rno-miR-764-3p   | 0.95035801  | chrX  | MIMAT0017370 |
| rno-miR-764-5p   | 0.95035801  | chrX  | MIMAT0012854 |
| rno-miR-770-3p   | 1.147149405 | chr6  | MIMAT0017317 |
| rno-miR-770-5p   | 0.95035801  | chr6  | MIMAT0005338 |
| rno-miR-7a-1-3p  | 1.344089307 | chr17 | MIMAT0000607 |
| rno-miR-7a-2-3p  | 0.95035801  | chr1  | MIMAT0017091 |
| rno-miR-7a-5p    | 1.45818746  | chr1  | MIMAT0000606 |
| rno-miR-7b       | 0.95035801  |       | MIMAT0000780 |
| rno-miR-802-3p   | 0.95035801  | chr11 | MIMAT0017362 |
| rno-miR-802-5p   | 0.95035801  | chr11 | MIMAT0012840 |
| rno-miR-871-3p   | 0.95035801  | chrX  | MIMAT0017289 |
| rno-miR-871-5p   | 0.95035801  | chrX  | MIMAT0005281 |
| rno-miR-872-3p   | 0.95035801  | chr5  | MIMAT0005283 |
| rno-miR-872-5p   | 1.243201026 | chr5  | MIMAT0005282 |
| rno-miR-873-3p   | 0.95035801  | chr5  | MIMAT0017318 |
| rno-miR-873-5p   | 0.95035801  | chr5  | MIMAT0005339 |
| rno-miR-874-3p   | 46.40523627 | chr17 | MIMAT0005284 |
| rno-miR-874-5p   | 0.95035801  | chr17 | MIMAT0017290 |
| rno-miR-875      | 0.95035801  | chr7  | MIMAT0012842 |
| rno-miR-876      | 0.95035801  | chr5  | MIMAT0012843 |
| rno-miR-877      | 0.95035801  | chr20 | MIMAT0005285 |
| rno-miR-878      | 0.95035801  | chrX  | MIMAT0005286 |
| rno-miR-879-3p   | 0.95035801  | chr4  | MIMAT0017291 |
| rno-miR-879-5p   | 0.95035801  | chr4  | MIMAT0005287 |
| rno-miR-880-3p   | 0.95035801  | chrX  | MIMAT0005288 |
| rno-miR-880-5p   | 0.95035801  | chrX  | MIMAT0017292 |
| rno-miR-881-3p   | 0.95035801  | chrX  | MIMAT0005289 |
| rno-miR-881-5p   | 0.95035801  | chrX  | MIMAT0017293 |
| rno-miR-883-3p   | 0.95035801  | chrX  | MIMAT0005290 |
| rno-miR-883-5p   | 0.95035801  | chrX  | MIMAT0017294 |
| rno-miR-92a-1-5p | 0.95035801  | chr15 | MIMAT0017107 |
| rno-miR-92a-2-5p | 0.95035801  | chrX  | MIMAT0017108 |

---



---

|                |             |       |              |
|----------------|-------------|-------|--------------|
| rno-miR-92a-3p | 1.018463234 | chr15 | MIMAT0000816 |
| rno-miR-92b-3p | 0.95035801  | chr2  | MIMAT0005340 |
| rno-miR-92b-5p | 0.95035801  | chr2  | MIMAT0017319 |
| rno-miR-93-3p  | 0.95035801  | chr12 | MIMAT0017109 |
| rno-miR-93-5p  | 1.188773615 | chr12 | MIMAT0000817 |
| rno-miR-935    | 0.95035801  | chr1  | MIMAT0012845 |
| rno-miR-96-3p  | 0.95035801  | chr4  | MIMAT0017110 |
| rno-miR-96-5p  | 0.95035801  | chr4  | MIMAT0000818 |
| rno-miR-98-3p  | 0.95035801  | chrX  | MIMAT0017111 |
| rno-miR-98-5p  | 1.106923101 | chrX  | MIMAT0000819 |
| rno-miR-99a-3p | 0.954227719 | chr11 | MIMAT0004724 |
| rno-miR-99a-5p | 1.243159147 | chr11 | MIMAT0000820 |
| rno-miR-99b-3p | 82.13931438 | chr1  | MIMAT0004725 |
| rno-miR-99b-5p | 0.978458522 | chr1  | MIMAT0000821 |
| rno-miR-9a-3p  | 0.95035801  | chr1  | MIMAT0004708 |
| rno-miR-9a-5p  | 0.95035801  | chr1  | MIMAT0000781 |
| rno-miR-9b-3p  | 0.95035801  | chr1  | MIMAT0017836 |
| rno-miR-9b-5p  | 0.95035801  | chr1  | MIMAT0017835 |

---

**Supplementary mRNA microarray information**

**Control\_vs\_Normal 2.0 fold up regulated genes**

| Fold change | Regulation | ACCESSION    | GeneSymbol | GeneID |
|-------------|------------|--------------|------------|--------|
| 2.5321603   | up         | NM_001007759 | 3-Mar      | 364878 |
| 6.000517    | up         | XM_001080178 | 5-Mar      | 294079 |
| 2.239044    | up         | XM_001065952 | 6-Mar      | 294862 |
| 7.8270965   | up         | NM_057148    | 2-Sep      | 117515 |
| 7.8498096   | up         | NM_001011893 | 4-Sep      | 287606 |
| 9.984365    | up         | NM_022616    | 7-Sep      | 64551  |
| 2.8324516   | up         | XM_001063271 | 11-Sep     | 305227 |
| 21.22125    | up         | NM_133297    | 15-Sep     | 113922 |
| 192.48135   | up         | XM_001076609 | A2bp1      | 302920 |
| 29.53327    | up         | XM_001057423 | Aamp       | 301512 |
| 13.188923   | up         | XM_001077503 | Aars       | 292023 |
| 2.5877452   | up         | NM_001034109 | Aarsd1     | 619440 |
| 2.4969501   | up         | XM_344230    | Aasdh      | 364136 |
| 7.48782     | up         | XM_001070860 | Aasdhppt   | 300328 |
| 6.499917    | up         | NM_053720    | Aatf       | 114512 |
| 3.5585437   | up         | NM_178095    | Abca1      | 313210 |
| 2.7695181   | up         | NM_173307    | Abca5      | 286970 |
| 3.35671     | up         | NM_207598    | Abca7      | 299609 |
| 7.3138556   | up         | XM_001081603 | Abca8a     | 303638 |
| 4.8900294   | up         | NM_001012166 | Abcb10     | 361439 |
| 64.058136   | up         | NM_080582    | Abcb6      | 140669 |
| 4.106377    | up         | NM_212518    | Abcb7      | 302395 |
| 21.744947   | up         | NM_022281    | Abcc1      | 24565  |
| 5.565488    | up         | NM_133411    | Abcc4      | 170924 |
| 5.018865    | up         | NM_053924    | Abcc5      | 116721 |
| 7.886269    | up         | NM_013039    | Abcc8      | 25559  |
| 50.914726   | up         | NM_013040    | Abcc9      | 25560  |
| 31.650076   | up         | XM_001064797 | Abce1      | 361390 |
| 57.57595    | up         | XM_001056151 | Abcf1      | 85493  |
| 18.05017    | up         | XM_001057136 | Abcf2      | 311959 |
| 8.042051    | up         | NM_001011896 | Abcf3      | 287982 |
| 6.8743954   | up         | NM_001024314 | Abhd12     | 499913 |
| 5.6362      | up         | XM_001076411 | Abhd13     | 306630 |
| 2.3718662   | up         | XM_001064693 | Abhd2      | 293050 |
| 6.2116227   | up         | XM_001053662 | Abhd4      | 364380 |
| 4.301085    | up         | NM_212524    | Abhd5      | 316122 |
| 4.2911906   | up         | NM_001007680 | Abhd6      | 305795 |
| 10.791459   | up         | NM_024397    | Abi1       | 79249  |
| 2.7476451   | up         | NM_001044394 | Ablim1     | 307989 |
| 2.6042612   | up         | NM_001001514 | Ablim2     | 360958 |

|            |    |              |        |        |
|------------|----|--------------|--------|--------|
| 110.376495 | up | NM_175844    | Abra   | 286965 |
| 9.75331    | up | NM_001005902 | Abtb1  | 297432 |
| 69.201385  | up | NM_130433    | Acaa2  | 170465 |
| 7.9568768  | up | NM_053922    | Acacb  | 116719 |
| 7.1480827  | up | XM_001072510 | Acad11 | 315973 |
| 19.423185  | up | XM_001059349 | Acad9  | 294973 |
| 33.392086  | up | NM_016986    | Acadm  | 24158  |
| 26.181276  | up | NM_013084    | Acadsb | 25618  |
| 24.371769  | up | NM_012891    | Acadvl | 25363  |
| 59.369328  | up | NM_017075    | Acat1  | 25014  |
| 3.3336012  | up | NM_001006995 | Acat2  | 308100 |
| 11.490718  | up | NM_182843    | Acbd3  | 289312 |
| 2.764437   | up | NM_001012013 | Acbd4  | 303577 |
| 11.946795  | up | NM_001011906 | Acbd6  | 289125 |
| 6.0442543  | up | NM_012544    | Ace    | 24310  |
| 12.656479  | up | XM_001054451 | Acin1  | 305884 |
| 38.53995   | up | NM_017321    | Aco1   | 50655  |
| 174.0852   | up | NM_024398    | Aco2   | 79250  |
| 7.7169228  | up | NM_130756    | Acot8  | 170588 |
| 53.98139   | up | NM_001013960 | Acot9  | 302640 |
| 8.001724   | up | NM_017340    | Acox1  | 50681  |
| 5.8309317  | up | NM_021262    | Acp1   | 24161  |
| 6.40473    | up | NM_016988    | Acp2   | 24162  |
| 2.2140758  | up | XM_001079424 | Acsf3  | 498962 |
| 31.874144  | up | NM_012820    | Acs11  | 25288  |
| 45.02632   | up | NM_057107    | Acs13  | 114024 |
| 6.566231   | up | NM_053623    | Acs14  | 113976 |
| 4.284527   | up | NM_053607    | Acs15  | 94340  |
| 2.959624   | up | NM_130739    | Acs16  | 117243 |
| 13.425908  | up | XM_001064684 | Acss2  | 311569 |
| 1018.92096 | up | NM_019212    | Acta1  | 29437  |
| 69.88831   | up | NM_031144    | Actb   | 81822  |
| 24.48424   | up | NM_019183    | Actc1  | 29275  |
| 2.5368388  | up | XM_001058533 | Actg1  | 287876 |
| 4.5197883  | up | NM_031005    | Actn1  | 81634  |
| 19.282362  | up | XM_001061664 | Actn2  | 291245 |
| 305.7847   | up | NM_133424    | Actn3  | 171009 |
| 3.6932015  | up | NM_031675    | Actn4  | 63836  |
| 5.68593    | up | NM_001039028 | Actr1b | 316333 |
| 43.398056  | up | NM_001009268 | Actr2  | 289820 |
| 6.7385473  | up | NM_031068    | Actr3  | 81732  |
| 18.266203  | up | XM_001063449 | Actr8  | 361107 |
| 3.3587387  | up | NM_024486    | Acvr1  | 79558  |
| 2.066603   | up | NM_199230    | Acvr1b | 29381  |

|           |    |              |          |        |
|-----------|----|--------------|----------|--------|
| 3.746111  | up | NM_031571    | Acvr2a   | 29263  |
| 2.8916993 | up | NM_001005383 | Acy1     | 300981 |
| 18.543358 | up | XM_001060176 | Acyp1    | 299203 |
| 3.6294734 | up | NM_130399    | Ada      | 24165  |
| 5.914033  | up | XM_001054737 | Adam10   | 29650  |
| 6.6142163 | up | NM_020308    | Adam15   | 57025  |
| 2.2862673 | up | XM_001054356 | Adam41   | 500688 |
| 11.385195 | up | NM_001014772 | Adam9    | 290834 |
| 6.618955  | up | NM_024400    | Adamts1  | 79252  |
| 2.3827314 | up | XM_213548    | Adamts2  | 287899 |
| 3.6736531 | up | XM_001058144 | Adamts20 | 315263 |
| 4.0169187 | up | NM_198761    | Adamts5  | 304135 |
| 2.3295884 | up | XM_001055774 | Adamts8  | 300475 |
| 6.1983924 | up | XM_001076761 | Adamts9  | 312566 |
| 3.417174  | up | NM_020101    | Adap2    | 56826  |
| 2.3325517 | up | NM_031006    | Adar     | 81635  |
| 34.58998  | up | NM_031007    | Adcy2    | 81636  |
| 4.902949  | up | NM_019285    | Adcy4    | 54223  |
| 5.834807  | up | XM_001077332 | Adcy9    | 302950 |
| 2.4965441 | up | NM_031552    | Add3     | 25230  |
| 18.895517 | up | NM_001007144 | Adfp     | 298199 |
| 8.3343525 | up | NM_001025423 | Adhfe1   | 362474 |
| 2.723362  | up | NM_199097    | Adi1     | 298934 |
| 186.22127 | up | NM_207587    | Adipor1  | 289036 |
| 17.4825   | up | NM_012895    | Adk      | 25368  |
| 3.8220046 | up | NM_012715    | Adm      | 25026  |
| 5.3928375 | up | NM_022681    | Adnp     | 64622  |
| 10.938377 | up | NM_183325    | Adprh    | 25371  |
| 9.6545515 | up | NM_001013054 | Adprhl1  | 290880 |
| 5.9929714 | up | NM_012492    | Adrb2    | 24176  |
| 52.611755 | up | NM_031708    | Adrm1    | 65138  |
| 54.485783 | up | XM_001076341 | Adsl     | 315150 |
| 13.369838 | up | XM_001059694 | Adss     | 289276 |
| 13.746138 | up | XM_001064302 | Aen      | 361594 |
| 39.50045  | up | NM_019220    | Aes      | 29466  |
| 2.017053  | up | XM_001073824 | Aff4     | 303132 |
| 6.886626  | up | XM_001079534 | Afg311   | 361436 |
| 6.638204  | up | XM_001061139 | Afg312   | 307350 |
| 2.869712  | up | XM_001055784 | Aftph    | 305544 |
| 6.442519  | up | NM_001031641 | Aga      | 290923 |
| 3.3997002 | up | XM_001063833 | Agbl1    | 308724 |
| 5.862535  | up | XM_001060407 | Aggf1    | 310005 |
| 2.4261076 | up | XM_001070395 | Agk      | 502749 |
| 4.0805693 | up | XM_001073642 | Ag1      | 362029 |

|           |    |              |            |        |
|-----------|----|--------------|------------|--------|
| 2.2620852 | up | XM_001074707 | Agpat2     | 311821 |
| 6.310175  | up | XM_001071257 | Agpat3     | 294324 |
| 12.883207 | up | NM_001047849 | Agpat6     | 290843 |
| 3.963369  | up | NM_053350    | Agps       | 84114  |
| 51.005424 | up | XM_001061502 | Agtppb1    | 290986 |
| 4.861004  | up | NM_001007654 | Agtrap     | 298646 |
| 13.612818 | up | XM_001068488 | Ahcy11     | 362013 |
| 2.0764534 | up | XM_001062287 | Ahcy12     | 312192 |
| 3.074812  | up | XM_342936    | Ahdc1      | 362617 |
| 39.246582 | up | XM_001078032 | Ahnak      | 191572 |
| 2.6095138 | up | XM_001072924 | Ahnak2     | 314478 |
| 4.8196297 | up | NM_031356    | Aifm1      | 83533  |
| 8.189546  | up | XM_001056179 | Aifm2      | 361843 |
| 23.44167  | up | NM_053757    | Aimp1      | 114632 |
| 3.1875315 | up | NM_001037348 | Aimp2      | 288480 |
| 15.352392 | up | NM_172327    | Aip        | 282827 |
| 101.58822 | up | NM_024349    | Ak1        | 24183  |
| 6.610669  | up | NM_001033967 | Ak2        | 24184  |
| 12.256261 | up | NM_013218    | Ak3        | 26956  |
| 3.0123482 | up | XM_001077273 | Akap10     | 360540 |
| 2.8027196 | up | NM_001011974 | Akap2      | 298024 |
| 2.6466582 | up | NM_001013946 | Akap8l     | 299569 |
| 4.929081  | up | NM_001030054 | Akirin1    | 595134 |
| 30.953552 | up | NM_001039914 | Akirin2    | 297968 |
| 2.7817883 | up | XM_001064334 | Akna       | 362530 |
| 146.08061 | up | NM_031000    | Akr1a1     | 78959  |
| 30.733274 | up | NM_012498    | Akr1b1     | 24192  |
| 13.058733 | up | NM_001013084 | Akr1b10    | 296972 |
| 9.06148   | up | XM_001055853 | Akr1b1-ps2 | 500301 |
| 3.2376504 | up | NM_138547    | Akr1c14    | 191574 |
| 3.3826423 | up | XM_001062695 | Akr1c19    | 307096 |
| 10.852871 | up | XM_001062861 | Akr1cl1    | 361267 |
| 2.1570952 | up | NM_001008342 | Akr1cl2    | 307091 |
| 7.7203465 | up | NM_033230    | Akt1       | 24185  |
| 12.08868  | up | NM_017093    | Akt2       | 25233  |
| 2.8263206 | up | NM_001011926 | Aktip      | 291906 |
| 33.632755 | up | NM_024484    | Alas1      | 65155  |
| 7.360723  | up | NM_013197    | Alas2      | 25748  |
| 101.89897 | up | NM_022407    | Aldh1a1    | 24188  |
| 2.2776518 | up | NM_053896    | Aldh1a2    | 116676 |
| 4.283002  | up | NM_022547    | Aldh1l1    | 64392  |
| 10.010283 | up | NM_032416    | Aldh2      | 29539  |
| 3.121298  | up | NM_031731    | Aldh3a2    | 65183  |
| 19.512348 | up | XM_001062804 | Aldh5a1    | 291133 |

|            |    |              |                 |        |
|------------|----|--------------|-----------------|--------|
| 15.35261   | up | NM_031057    | Aldh6a1         | 81708  |
| 4.4918294  | up | XM_001059375 | Aldh7a1         | 291450 |
| 17.821646  | up | NM_012495    | Aldoa           | 24189  |
| 3.3566067  | up | NM_012497    | Aldoc           | 24191  |
| 4.061029   | up | NM_001014176 | Alg14           | 362031 |
| 6.0540533  | up | NM_001011897 | Alg3            | 287983 |
| 2.1964996  | up | NM_001033709 | Alg6            | 362547 |
| 9.430672   | up | XM_001062293 | Alkbh           | 362766 |
| 74.7198    | up | NM_001014180 | Alkbh3          | 362169 |
| 11.1195545 | up | XM_001077537 | Alkbh5          | 303193 |
| 2.1913896  | up | XM_001053732 | Alkbh7          | 679944 |
| 2.9805956  | up | XM_001074073 | Alms1           | 297408 |
| 2.386447   | up | NM_012822    | Alox5           | 25290  |
| 4.1660113  | up | NM_017260    | Alox5ap         | 29624  |
| 3.6144125  | up | XM_001076258 | Alpk1           | 310879 |
| 50.81985   | up | XM_574162    | Alpk2           | 498875 |
| 3.2314541  | up | XM_001064402 | Als2cr4         | 316412 |
| 2.8599336  | up | NM_012816    | Amacr           | 25284  |
| 2.5805383  | up | NM_031011    | Amd1            | 81640  |
| 53.42303   | up | XM_001062954 | Amfr            | 361367 |
| 2.717046   | up | XM_001056974 | Amot            | 300289 |
| 2.8098428  | up | XM_001068539 | Amotl2          | 65157  |
| 292.3485   | up | NM_138876    | Ampd1           | 25028  |
| 2.8529332  | up | XM_001069998 | Ampd2           | 362015 |
| 8.427021   | up | NM_031544    | Ampd3           | 25095  |
| 14.014046  | up | NM_001014121 | Amz2            | 360650 |
| 2.1628516  | up | XM_001070328 | Anapc10         | 361389 |
| 9.958425   | up | XM_001081824 | Anapc11         | 498030 |
| 4.8163958  | up | XM_001060533 | Anapc13         | 685029 |
| 12.35652   | up | XM_001072691 | Anapc2          | 296558 |
| 4.8366694  | up | XM_001054052 | Anapc4          | 305420 |
| 7.8486447  | up | NM_001080147 | Anapc5          | 288671 |
| 7.182477   | up | XM_001079480 | Anapc7          | 304490 |
| 3.1952474  | up | XM_001068063 | Angel2          | 305035 |
| 2.037773   | up | XM_001054429 | Angptl1         | 679942 |
| 3.3982532  | up | NM_133569    | Angptl2         | 171100 |
| 3.0313187  | up | NM_199115    | Angptl4         | 362850 |
| 6.408802   | up | XM_342337    | Ank2            | 362036 |
| 18.748466  | up | NM_053714    | Ankh            | 114506 |
| 34.295944  | up | XM_001054207 | Ankhd1-Eif4ebp3 | 679725 |
| 8.989602   | up | XM_001074108 | Ankmy2          | 314046 |
| 166.4432   | up | NM_013220    | Ankrd1          | 27064  |
| 2.1619973  | up | XM_341466    | Ankrd10         | 361183 |
| 10.633544  | up | XM_001077732 | Ankrd11         | 365023 |

|           |    |              |          |        |
|-----------|----|--------------|----------|--------|
| 2.8428707 | up | NM_001012148 | Ankrd13a | 360823 |
| 24.571209 | up | XM_001072667 | Ankrd17  | 289521 |
| 3.0118604 | up | XM_001055096 | Ankrd2   | 309374 |
| 52.090214 | up | XM_001056748 | Ankrd23  | 316330 |
| 2.650079  | up | XM_001079798 | Ankrd27  | 361555 |
| 3.1961844 | up | XM_001057687 | Ankrd28  | 306264 |
| 3.0009418 | up | XM_001059377 | Ankrd32  | 294601 |
| 2.337372  | up | XM_001056809 | Ankrd39  | 367251 |
| 4.963217  | up | NM_001013948 | Ankrd46  | 299982 |
| 2.3951921 | up | XM_001069855 | Ankrd50  | 294988 |
| 2.8543224 | up | NM_001012112 | Ankrd9   | 314457 |
| 2.7347398 | up | NM_001009676 | Anks3    | 302937 |
| 11.27179  | up | NM_001014219 | Ankzf1   | 363255 |
| 4.4816146 | up | XM_001066475 | Ano1     | 309135 |
| 2.4952466 | up | XM_001078269 | Ano10    | 301111 |
| 33.251278 | up | NM_131911    | Anp32b   | 170724 |
| 15.70632  | up | NM_001013200 | Anp32e   | 361999 |
| 4.296673  | up | NM_031012    | Anpep    | 81641  |
| 17.96255  | up | NM_001011918 | Anxa11   | 290527 |
| 8.07941   | up | NM_019905    | Anxa2    | 56611  |
| 8.374845  | up | NM_012823    | Anxa3    | 25291  |
| 23.184551 | up | NM_024155    | Anxa4    | 79124  |
| 13.370571 | up | NM_013132    | Anxa5    | 25673  |
| 13.363781 | up | NM_024156    | Anxa6    | 79125  |
| 10.17161  | up | NM_130416    | Anxa7    | 155423 |
| 4.5783677 | up | NM_031582    | Aoc3     | 29473  |
| 6.5652194 | up | NM_019363    | Aox1     | 54349  |
| 2.8132002 | up | XM_001072391 | Ap1g1    | 171494 |
| 2.690689  | up | NM_001044239 | Ap1m1    | 306332 |
| 2.5762644 | up | XM_001078324 | Ap2a1    | 308578 |
| 2.3573399 | up | NM_080583    | Ap2b1    | 140670 |
| 78.42753  | up | NM_053837    | Ap2m1    | 116563 |
| 6.4795465 | up | NM_022952    | Ap2s1    | 65046  |
| 15.220906 | up | XM_001067082 | Ap3b1    | 309969 |
| 34.332226 | up | XM_001076208 | Ap3d1    | 314633 |
| 11.709057 | up | NM_133593    | Ap3m1    | 171126 |
| 2.8181615 | up | NM_133305    | Ap3m2    | 140667 |
| 3.409417  | up | XM_001054882 | Ap3s1    | 302290 |
| 5.0201273 | up | XM_001077874 | Apbb2    | 305338 |
| 6.5232234 | up | NM_012500    | Apeh     | 24206  |
| 20.408228 | up | NM_024148    | Apex1    | 79116  |
| 22.044313 | up | NM_001047090 | Aph1b    | 300802 |
| 5.467188  | up | XM_001071044 | Api5     | 362170 |
| 2.8543355 | up | XM_001072220 | Apip     | 295961 |

|            |    |              |          |        |
|------------|----|--------------|----------|--------|
| 44.722656  | up | XM_001055798 | Aplp2    | 64312  |
| 19.722841  | up | XM_001068886 | Apoa1bp  | 295229 |
| 3.7775202  | up | NM_012907    | Apobec1  | 25383  |
| 77.949905  | up | XM_001063358 | Apobec2  | 301226 |
| 5.46784    | up | NM_012777    | Apod     | 25239  |
| 41.539253  | up | NM_138828    | Apoe     | 25728  |
| 5.8380165  | up | XM_001075769 | Apol11a  | 300060 |
| 3.5779715  | up | NM_001013175 | Apol3    | 315108 |
| 7.8390474  | up | NM_001025066 | Apol9a   | 503164 |
| 6.9394336  | up | NM_001014105 | Apool    | 317191 |
| 90.471054  | up | NM_019288    | App      | 54226  |
| 4.089921   | up | XM_001081113 | Appbp2   | 303396 |
| 13.467267  | up | NM_001013061 | Aprt     | 292072 |
| 8.884778   | up | NM_012778    | Aqp1     | 25240  |
| 41.17633   | up | NM_001033663 | Araf     | 64363  |
| 2.073893   | up | XM_001066901 | Arap1    | 361617 |
| 7.1024213  | up | NM_001007662 | Arcn1    | 300674 |
| 4.0675106  | up | XM_001057202 | Ard1a    | 363518 |
| 9.787642   | up | NM_022518    | Arf1     | 64310  |
| 5.3626866  | up | NM_024150    | Arf2     | 79119  |
| 3.2695446  | up | NM_080904    | Arf3     | 140940 |
| 7.6358023  | up | NM_024151    | Arf4     | 79120  |
| 4.8539157  | up | NM_024149    | Arf5     | 79117  |
| 4.2535024  | up | NM_024152    | Arf6     | 79121  |
| 4.627296   | up | NM_181083    | Arfgef2  | 296380 |
| 2.4701583  | up | NM_021763    | Arfip1   | 60382  |
| 23.030876  | up | XM_001065757 | Arhgap10 | 688429 |
| 6.111298   | up | XM_001055788 | Arhgap12 | 307016 |
| 5.669783   | up | NM_022244    | Arhgap17 | 63994  |
| 3.4826872  | up | XM_001054365 | Arhgap28 | 301709 |
| 3.114694   | up | NM_001047869 | Arhgap5  | 299012 |
| 2.1628036  | up | NM_001007005 | Arhgdia  | 360678 |
| 3.338776   | up | NM_001009600 | Arhgdib  | 362456 |
| 3.7610605  | up | XM_001055379 | Arhgef3  | 290541 |
| 5.666207   | up | NM_001005565 | Arhgef6  | 363509 |
| 2.4321694  | up | NM_023957    | Arhgef9  | 66013  |
| 16.646517  | up | XM_001065794 | Arid1a   | 297867 |
| 11.4550085 | up | XM_001059099 | Arid2    | 366980 |
| 3.978019   | up | XM_001077431 | Arid4a   | 314205 |
| 6.2825966  | up | NM_001034934 | Arid5a   | 316327 |
| 8.32094    | up | NM_001013108 | Arih1    | 300756 |
| 3.6545162  | up | NM_001012275 | Arih2    | 316005 |
| 8.2211     | up | NM_022385    | Arl1     | 64187  |
| 2.6341107  | up | NM_031711    | Arl2     | 65142  |



|           |    |              |         |        |
|-----------|----|--------------|---------|--------|
| 22.431414 | up | NM_001024906 | Arl2bp  | 498910 |
| 3.6325939 | up | NM_053979    | Arl5a   | 117050 |
| 8.47544   | up | NM_198737    | Arl6ip1 | 293551 |
| 4.9378667 | up | NM_001025630 | Arl6ip4 | 288656 |
| 49.739845 | up | NM_023972    | Arl6ip5 | 66028  |
| 43.175583 | up | NM_001024332 | Arl8b   | 500282 |
| 5.6389093 | up | XM_231295    | Armc10  | 296758 |
| 2.330012  | up | XM_236599    | Armc8   | 315949 |
| 3.1737704 | up | NM_001014274 | Armcx2  | 367903 |
| 6.632151  | up | NM_001014273 | Armcx3  | 367902 |
| 5.575323  | up | NM_012780    | Arnt    | 25242  |
| 3.7476935 | up | NM_024362    | Arntl   | 29657  |
| 6.925033  | up | NM_031146    | Arpc1a  | 81824  |
| 10.484723 | up | NM_019289    | Arpc1b  | 54227  |
| 16.201515 | up | XM_001056906 | Arpc2   | 301511 |
| 8.361481  | up | XM_001079492 | Arpc3   | 288669 |
| 2.5892081 | up | XM_001078712 | Arpc4   | 297518 |
| 4.70514   | up | NM_001025717 | Arpc5   | 360854 |
| 12.093276 | up | NM_001037767 | Arpc5l  | 296710 |
| 10.802543 | up | XM_001059654 | Arpc5l2 | 501132 |
| 11.544813 | up | NM_031660    | Arpp19  | 60336  |
| 2.0429704 | up | XM_343492    | Arpp-2l | 363153 |
| 2.6597683 | up | XM_001071550 | Arrdc1  | 366001 |
| 4.7321415 | up | XM_001070067 | Arrdc2  | 306344 |
| 57.7006   | up | NM_001007797 | Arrdc3  | 309945 |
| 2.313434  | up | NM_001047917 | Arsk    | 365619 |
| 68.34608  | up | XM_001068204 | Art1    | 308873 |
| 19.04833  | up | NM_001012034 | Art3    | 305235 |
| 3.073155  | up | NM_080890    | As3mt   | 140925 |
| 2.7610886 | up | NM_053407    | Asah1   | 84431  |
| 6.2895966 | up | XM_001057256 | Asb10   | 499972 |
| 49.34223  | up | NM_001037367 | Asb12   | 503446 |
| 11.578418 | up | XM_001055574 | Asb14   | 680076 |
| 63.044647 | up | NM_001011984 | Asb2    | 299266 |
| 3.8920708 | up | XM_344277    | Asb3    | 364227 |
| 2.1861699 | up | NM_001024318 | Asb4    | 500017 |
| 33.167694 | up | NM_001044247 | Asb5    | 361187 |
| 2.5254962 | up | XM_001059593 | Asb7    | 365277 |
| 3.0951343 | up | XM_001062104 | Ascc3   | 309887 |
| 12.737001 | up | XM_001059946 | Asfla   | 294408 |
| 8.219282  | up | XM_001074246 | Ash1l   | 310638 |
| 29.502392 | up | XM_001062523 | Ash2l   | 290829 |
| 5.6914687 | up | NM_021577    | Asl     | 59085  |
| 3.7834642 | up | XM_001075108 | Asmtl   | 288527 |

|           |    |              |         |        |
|-----------|----|--------------|---------|--------|
| 3.3005311 | up | XM_001066031 | Asna1   | 288919 |
| 20.087944 | up | XM_001060870 | Asnsd1  | 299507 |
| 2.0561006 | up | NM_024399    | Aspa    | 79251  |
| 32.699738 | up | NM_001098239 | Asph    | 312981 |
| 2.023331  | up | NM_001034922 | Atad3a  | 298682 |
| 2.3972971 | up | XM_001077907 | Ate1    | 293526 |
| 4.878411  | up | XM_235657    | Atf1    | 315305 |
| 2.4626472 | up | NM_012912    | Atf3    | 25389  |
| 14.821287 | up | NM_024403    | Atf4    | 79255  |
| 13.208881 | up | NM_001002809 | Atf6b   | 406169 |
| 12.267808 | up | XM_001070613 | Atf7ip  | 312800 |
| 6.7329793 | up | XM_343619    | Atg16l1 | 363278 |
| 4.0643525 | up | XM_233220    | Atg4c   | 313391 |
| 3.91956   | up | XM_001071698 | Atg4d   | 686505 |
| 3.908768  | up | NM_001014250 | Atg5    | 365601 |
| 29.507113 | up | NM_031014    | Atic    | 81643  |
| 22.791864 | up | XM_001063138 | Atl2    | 298757 |
| 2.893929  | up | XM_001078346 | Atmin   | 315037 |
| 4.9451313 | up | XM_001067830 | Atp11b  | 361929 |
| 3.2146845 | up | XM_001070411 | Atp13a1 | 290673 |
| 3.850685  | up | XM_001053119 | Atp13a3 | 360728 |
| 76.67486  | up | NM_012504    | Atp1a1  | 24211  |
| 197.87514 | up | NM_012505    | Atp1a2  | 24212  |
| 10.173984 | up | NM_013113    | Atp1b1  | 25650  |
| 34.6453   | up | NM_012507    | Atp1b2  | 24214  |
| 2.2677236 | up | NM_012913    | Atp1b3  | 25390  |
| 111.51877 | up | NM_058213    | Atp2a1  | 116601 |
| 211.49785 | up | NM_017290    | Atp2a2  | 29693  |
| 34.174427 | up | NM_053311    | Atp2b1  | 29598  |
| 2.9598765 | up | XM_001057885 | Atp2b3  | 29599  |
| 215.4668  | up | NM_023093    | Atp5a1  | 65262  |
| 482.72385 | up | NM_134364    | Atp5b   | 171374 |
| 72.97612  | up | NM_139106    | Atp5d   | 245965 |
| 2.5501146 | up | NM_139099    | Atp5e   | 245958 |
| 140.97514 | up | NM_134365    | Atp5f1  | 171375 |
| 5.0476246 | up | NM_017311    | Atp5g1  | 29754  |
| 85.58982  | up | NM_133556    | Atp5g2  | 171082 |
| 72.6738   | up | NM_053756    | Atp5g3  | 114630 |
| 89.058784 | up | NM_019383    | Atp5h   | 641434 |
| 16.370697 | up | XM_001057586 | Atp5hl1 | 306478 |
| 77.29934  | up | NM_080481    | Atp5i   | 140608 |
| 12.60453  | up | XM_001074466 | Atp5j2  | 690441 |
| 40.449818 | up | NM_212516    | Atp5l   | 300677 |
| 21.982586 | up | NM_138883    | Atp5o   | 192241 |

|           |    |              |          |        |
|-----------|----|--------------|----------|--------|
| 44.36263  | up | NM_031785    | Atp6ap1  | 83615  |
| 5.427698  | up | XM_001060853 | Atp6ap2  | 302526 |
| 7.4682746 | up | NM_031604    | Atp6v0a1 | 29757  |
| 3.9915278 | up | NM_053775    | Atp6v0a2 | 116455 |
| 10.451377 | up | XM_001068154 | Atp6v0b  | 298451 |
| 53.27877  | up | NM_130823    | Atp6v0c  | 170667 |
| 38.955    | up | NM_001011927 | Atp6v0d1 | 291969 |
| 18.418705 | up | NM_053578    | Atp6v0e1 | 94170  |
| 3.244484  | up | NM_001002253 | Atp6v0e2 | 436582 |
| 2.1767688 | up | XM_001058034 | Atp6v1a  | 685232 |
| 5.5793324 | up | NM_057213    | Atp6v1b2 | 117596 |
| 18.678198 | up | NM_001011992 | Atp6v1c1 | 299971 |
| 67.069305 | up | NM_199386    | Atp6v1d  | 299159 |
| 61.60033  | up | NM_053884    | Atp6v1f  | 116664 |
| 2.0459306 | up | NM_052803    | Atp7a    | 24941  |
| 2.899825  | up | XM_001064261 | Atp8b1   | 291555 |
| 31.681538 | up | XM_001074928 | Atp8b2   | 361984 |
| 11.986331 | up | XM_001057484 | Atp9b    | 291411 |
| 2.5085518 | up | NM_001014181 | Atpbd4   | 362191 |
| 25.560417 | up | NM_012915    | Atpif1   | 25392  |
| 2.089606  | up | XM_001055797 | Atrip    | 301014 |
| 5.6856046 | up | NM_031351    | Atrn     | 83526  |
| 8.093949  | up | NM_133313    | Atxn10   | 170821 |
| 3.6116064 | up | XM_341928    | Atxn2l   | 361649 |
| 2.1690488 | up | XM_001069337 | Atxn7    | 361015 |
| 4.1122947 | up | XM_001070248 | Atxn7l2  | 310781 |
| 36.02868  | up | XM_001053439 | Auh      | 361215 |
| 379.9817  | up | NM_001079899 | Aup1     | 680423 |
| 21.43631  | up | NM_001004237 | Aurkaip1 | 298687 |
| 15.819605 | up | XM_001080523 | Aven     | 311299 |
| 3.3221467 | up | NM_001025705 | Azi2     | 316051 |
| 3.390028  | up | NM_022585    | Azin1    | 58961  |
| 23.337152 | up | NM_012512    | B2m      | 24223  |
| 2.3316505 | up | XM_001072516 | B3gnt1   | 293667 |
| 2.1898081 | up | NM_001009539 | B4galt3  | 494342 |
| 4.0964828 | up | XM_001076733 | B9d1     | 287383 |
| 3.6807668 | up | NM_019204    | Bace1    | 29392  |
| 2.3378658 | up | NM_001002802 | Bace2    | 288227 |
| 2.0727062 | up | NM_022698    | Bad      | 64639  |
| 74.20521  | up | XM_001059235 | Bag1     | 297994 |
| 4.875405  | up | XM_001073000 | Bag2     | 690038 |
| 14.277131 | up | NM_001011936 | Bag3     | 293524 |
| 6.6095986 | up | NM_001008526 | Bag5     | 366734 |
| 12.644788 | up | NM_053631    | Banf1    | 114087 |

|            |    |              |         |        |
|------------|----|--------------|---------|--------|
| 3.9258     | up | XM_001077496 | Banp    | 292064 |
| 13.581373  | up | NM_133300    | Bat1    | 114612 |
| 19.32357   | up | NM_001033968 | Bat3    | 94342  |
| 20.515944  | up | NM_001034157 | Bat4    | 415064 |
| 7.847773   | up | NM_017059    | Bax     | 24887  |
| 2.0720322  | up | XM_001077467 | Baz1b   | 368002 |
| 3.0787008  | up | XM_001058884 | Baz2b   | 317627 |
| 2.0853593  | up | NM_053618    | Bbs2    | 113948 |
| 2.0439956  | up | XM_001074489 | Bbs9    | 315484 |
| 2.295225   | up | NM_001079938 | Bbx     | 303970 |
| 3.9494696  | up | NM_031752    | Bcam    | 78958  |
| 13.338813  | up | NM_001004224 | Bcap31  | 293852 |
| 42.189884  | up | XM_001064236 | Bcas2   | 295334 |
| 8.660483   | up | XM_001081081 | Bcas3   | 363662 |
| 23.746956  | up | NM_022400    | Bcat2   | 64203  |
| 12.5732155 | up | XM_001055516 | Bccip   | 361666 |
| 5.3586416  | up | NM_012782    | Bckdha  | 25244  |
| 40.14666   | up | XM_001062965 | Bckdhb  | 29711  |
| 20.302467  | up | NM_019244    | Bckdk   | 29603  |
| 3.3504298  | up | NM_031328    | Bcl10   | 83477  |
| 2.9141133  | up | XM_001078625 | Bcl2l12 | 361567 |
| 2.5636845  | up | XM_001058979 | Bcl2l13 | 312682 |
| 21.809916  | up | XM_001078626 | Bcl7c   | 293514 |
| 2.184531   | up | XM_001059711 | Bcor1l  | 302810 |
| 2.5550654  | up | XM_001079915 | Bcr     | 309696 |
| 5.08194    | up | NM_001007666 | Bcs1l   | 301514 |
| 2.4965022  | up | XM_001075590 | Bdh2    | 295458 |
| 20.016169  | up | NM_001034117 | Becn1   | 114558 |
| 2.8711295  | up | XM_001071606 | Bend7   | 361275 |
| 7.161517   | up | XM_001080943 | Best3   | 314847 |
| 4.6359253  | up | NM_019251    | Bet1    | 29631  |
| 7.3895063  | up | NM_019368    | Bet1l   | 54400  |
| 8.190391   | up | NM_001013125 | Bfar    | 304709 |
| 2.3314772  | up | NM_207611    | Bhlhb9  | 317407 |
| 12.073148  | up | NM_053328    | Bhlhe40 | 79431  |
| 2.4546218  | up | NM_198765    | Bicd2   | 306809 |
| 2.868189   | up | NM_022684    | Bid     | 64625  |
| 37.038155  | up | NM_053959    | Bin1    | 117028 |
| 28.09526   | up | NM_001013186 | Bin3    | 361065 |
| 28.161678  | up | NM_133582    | Blcap   | 171113 |
| 32.8155    | up | NM_001024233 | Bles03  | 266609 |
| 4.131518   | up | NM_001034163 | Blmh    | 287552 |
| 25.46678   | up | XM_001068887 | Bloc1s1 | 288785 |
| 10.6959095 | up | NM_001037349 | Bloc1s2 | 293938 |

|           |    |              |        |        |
|-----------|----|--------------|--------|--------|
| 15.708718 | up | XM_001072142 | Blvrb  | 292737 |
| 6.945328  | up | NM_001017494 | Blzf1  | 498266 |
| 3.1219976 | up | XM_225606    | Bmi1   | 307151 |
| 3.4946735 | up | XM_573559    | Bmp2k  | 498333 |
| 2.4708722 | up | NM_012827    | Bmp4   | 25296  |
| 4.13103   | up | NM_013107    | Bmp6   | 25644  |
| 4.726178  | up | NM_030849    | Bmpr1a | 81507  |
| 9.506041  | up | XM_001065181 | Bmpr2  | 140590 |
| 2.843524  | up | XM_001055775 | Bnip2  | 300811 |
| 48.826645 | up | NM_053420    | Bnip3  | 84480  |
| 15.102681 | up | NM_080888    | Bnip3l | 140923 |
| 8.383247  | up | NM_001013854 | Bod1   | 287173 |
| 11.279407 | up | NM_001071776 | Bola1  | 365875 |
| 5.346138  | up | XM_001072676 | Bola3  | 297388 |
| 4.7194037 | up | NM_001024250 | Bop1   | 300050 |
| 59.241627 | up | NM_199382    | Bpgm   | 296973 |
| 2.290188  | up | NM_001037206 | Bphl   | 361239 |
| 12.490537 | up | NM_171990    | Bpnt1  | 64473  |
| 2.901968  | up | XM_001070228 | Braf   | 114486 |
| 3.8309627 | up | XM_001059392 | Brcc3  | 316794 |
| 8.981144  | up | XM_001053059 | Brd1   | 315210 |
| 7.5126    | up | NM_212495    | Brd2   | 294276 |
| 2.0125089 | up | XM_342396    | Brd3   | 362092 |
| 10.359122 | up | XM_001066875 | Brd7   | 361374 |
| 3.2546442 | up | XM_217740    | Brd9   | 308067 |
| 3.298359  | up | XM_001073175 | Brf1   | 299347 |
| 48.92462  | up | NM_001009604 | Bri3   | 304284 |
| 3.2271814 | up | NM_001017487 | Bri3bp | 498176 |
| 16.694239 | up | NM_001009605 | Brms1  | 293668 |
| 4.338918  | up | XM_001075894 | Brms1l | 299053 |
| 4.791757  | up | NM_001007707 | Brp16  | 315094 |
| 4.2402864 | up | XM_001053799 | Brwd1  | 304061 |
| 2.18416   | up | XM_001080483 | Brwd2  | 309016 |
| 8.962216  | up | XM_001061389 | Bsdc1  | 297890 |
| 227.49521 | up | NM_012783    | Bsg    | 25246  |
| 14.338101 | up | NM_001011932 | Btbd1  | 293060 |
| 2.348517  | up | NM_001014022 | Btbd10 | 308890 |
| 5.826672  | up | NM_001077683 | Btbd6  | 690367 |
| 4.605985  | up | NM_001013073 | Btbd9  | 294318 |
| 64.534454 | up | NM_017259    | Btg2   | 29619  |
| 4.2549996 | up | NM_001007148 | Btrc   | 361765 |
| 2.2369063 | up | NM_001047906 | Bub3   | 361662 |
| 4.50847   | up | NM_001025277 | Bud13  | 300687 |
| 3.293831  | up | NM_053556    | Bud31  | 89819  |

|            |    |              |           |        |
|------------|----|--------------|-----------|--------|
| 6.5330644  | up | NM_001077590 | Bves      | 365603 |
| 5.242926   | up | XM_001063295 | Bxdc1     | 294436 |
| 9.5616865  | up | NM_001029915 | Bxdc2     | 294799 |
| 8.991022   | up | XM_001059406 | Bxdc5     | 499725 |
| 38.89032   | up | NM_182674    | Bysl      | 359727 |
| 15.120922  | up | NM_198789    | Bzw1      | 363232 |
| 3.0442598  | up | NM_134402    | Bzw2      | 171439 |
| 2.4271712  | up | NM_001030033 | Clgalt1c1 | 302499 |
| 2.9095225  | up | NM_001008515 | Clqa      | 298566 |
| 10.535032  | up | NM_019262    | Clqb      | 29687  |
| 6.894697   | up | NM_019259    | Clqbp     | 29681  |
| 21.3199    | up | NM_001008524 | Clqc      | 362634 |
| 2.9778128  | up | NM_001012123 | Clqtnf5   | 315598 |
| 14.711772  | up | XM_344414    | Clqtnf9   | 364395 |
| 6.837448   | up | XM_001061611 | Clr       | 312705 |
| 3.2733378  | up | NM_138900    | Clis      | 192262 |
| 5.6766067  | up | NM_001002805 | C4-2      | 406161 |
| 8.1329     | up | NM_031504    | C4b       | 24233  |
| 35.90061   | up | XM_217464    | Cab39     | 301574 |
| 5.6589746  | up | NM_001013185 | Cabc1     | 360887 |
| 3.8937705  | up | NM_053575    | Cabin1    | 94165  |
| 3.8566473  | up | XM_001059501 | Cables2   | 311703 |
| 14.008239  | up | NM_012919    | Cacna2d1  | 25399  |
| 17.129946  | up | NM_017346    | Cacnb1    | 50688  |
| 129.12779  | up | NM_019255    | Cacng1    | 29658  |
| 13.3153305 | up | NM_001004208 | Cacybp    | 289144 |
| 8.8872595  | up | XM_001063923 | Cad       | 24240  |
| 94.12793   | up | NM_139190    | Calcoco1  | 246047 |
| 2.845629   | up | NM_012717    | Calcr1    | 25029  |
| 17.123108  | up | NM_031969    | Calm1     | 24242  |
| 10.015566  | up | NM_017326    | Calm2     | 50663  |
| 9.149396   | up | NM_012518    | Calm3     | 24244  |
| 3.188855   | up | XM_001073968 | Calm-ps2  | 686404 |
| 27.69333   | up | NM_022399    | Calr      | 64202  |
| 4.0287137  | up | NM_022535    | Calu      | 64366  |
| 3.898624   | up | NM_134468    | Camk1     | 171503 |
| 8.780509   | up | NM_012920    | Camk2a    | 25400  |
| 3.2684913  | up | NM_001042356 | Camk2b    | 24245  |
| 9.044523   | up | NM_012519    | Camk2d    | 24246  |
| 38.7659    | up | NM_133605    | Camk2g    | 171140 |
| 4.2433834  | up | NM_173337    | Camk2n1   | 287005 |
| 4.6154246  | up | NM_053334    | Camlg     | 81715  |
| 4.2969527  | up | XM_001063719 | Camsap111 | 289400 |
| 3.1917675  | up | XM_001079889 | Camta2    | 287462 |

|            |    |              |          |        |
|------------|----|--------------|----------|--------|
| 7.4719954  | up | NM_054004    | Cand1    | 117152 |
| 31.595694  | up | NM_172008    | Canx     | 29144  |
| 112.325455 | up | NM_053874    | Cap2     | 116653 |
| 25.192085  | up | NM_017116    | Capn2    | 29154  |
| 5.556382   | up | NM_001030037 | Capn7    | 306260 |
| 46.25997   | up | NM_017118    | Capns1   | 29156  |
| 32.168545  | up | NM_001012185 | Caprin1  | 362173 |
| 12.038891  | up | NM_001009180 | Capza2   | 493810 |
| 136.7749   | up | NM_001005903 | Capzb    | 298584 |
| 6.0510445  | up | NM_175708    | Car11    | 308588 |
| 5.0597916  | up | NM_019291    | Car2     | 54231  |
| 82.034676  | up | NM_019292    | Car3     | 54232  |
| 9.558495   | up | NM_019174    | Car4     | 29242  |
| 3.2095249  | up | NM_152790    | Carhsp1  | 260416 |
| 58.661495  | up | NM_001030041 | Carm1    | 363026 |
| 8.621288   | up | XM_001065753 | Cars     | 293638 |
| 5.534884   | up | NM_147144    | Casc3    | 259170 |
| 3.5238395  | up | NM_053736    | Casp4    | 114555 |
| 4.04799    | up | NM_022260    | Casp7    | 64026  |
| 3.2238884  | up | NM_017131    | Casq2    | 29209  |
| 46.566135  | up | NM_012520    | Cat      | 24248  |
| 37.975243  | up | NM_133651    | Cav1     | 25404  |
| 3.3277876  | up | NM_131914    | Cav2     | 363425 |
| 3.069957   | up | NM_019155    | Cav3     | 29161  |
| 15.657298  | up | NM_199412    | Cbara1   | 365567 |
| 9.195261   | up | NM_001013191 | Cbfb     | 361391 |
| 3.4782376  | up | NM_133601    | Cblb     | 171136 |
| 4.2905254  | up | XM_001073155 | Cbll1    | 314028 |
| 2.055758   | up | XM_001081346 | Cbx1     | 360609 |
| 3.6466987  | up | XM_001069676 | Cbx5     | 300266 |
| 2.3255088  | up | NM_001034078 | Cbx8     | 303731 |
| 2.738537   | up | NM_001013869 | Cc2d1a   | 288908 |
| 5.442461   | up | XM_001067280 | Cc2d1b   | 313478 |
| 5.711236   | up | XM_001058761 | Ccar1    | 361849 |
| 5.0985     | up | NM_001013164 | Ccb11    | 311844 |
| 11.072871  | up | XM_001077352 | Ccdc101  | 293488 |
| 10.818293  | up | NM_001024866 | Ccdc104  | 289859 |
| 4.2445984  | up | XM_001063219 | Ccdc107  | 313496 |
| 17.063381  | up | XM_001054087 | Ccdc109a | 294560 |
| 5.0569277  | up | XM_001079737 | Ccdc123  | 292811 |
| 35.382374  | up | XM_001066312 | Ccdc124  | 290642 |
| 2.7143605  | up | XM_001056062 | Ccdc126  | 500117 |
| 7.5393353  | up | NM_198766    | Ccdc127  | 308060 |
| 4.6059914  | up | NM_001037644 | Ccdc130  | 304656 |

|            |    |              |         |        |
|------------|----|--------------|---------|--------|
| 7.5736666  | up | XM_001064458 | Ccdc132 | 312083 |
| 8.520621   | up | XM_001064000 | Ccdc136 | 362331 |
| 2.5300078  | up | XM_001060019 | Ccdc22  | 317381 |
| 9.2889595  | up | XM_001066869 | Ccdc25  | 361059 |
| 4.3326726  | up | NM_001037789 | Ccdc28a | 361454 |
| 3.9168158  | up | XM_001061538 | Ccdc28b | 682445 |
| 3.7199562  | up | NM_001014266 | Ccdc41  | 366872 |
| 2.608636   | up | NM_001013862 | Ccdc45  | 287766 |
| 14.259357  | up | NM_001013974 | Ccdc47  | 303606 |
| 4.4916778  | up | XM_001081381 | Ccdc49  | 360613 |
| 4.6375527  | up | XM_001079910 | Ccdc53  | 299707 |
| 13.018948  | up | XM_001081477 | Ccdc56  | 498000 |
| 5.8555965  | up | XM_001080741 | Ccdc59  | 314799 |
| 5.1294622  | up | XM_343001    | Ccdc75  | 362685 |
| 2.4813442  | up | XM_001073185 | Ccdc76  | 499697 |
| 6.3158946  | up | NM_001006974 | Ccdc86  | 293738 |
| 11.2897005 | up | NM_001024885 | Ccdc90b | 308820 |
| 10.376654  | up | NM_001014061 | Ccdc91  | 312863 |
| 2.0486848  | up | NM_001083898 | Ccdc92  | 1E+08  |
| 2.6359658  | up | NM_001024997 | Ccdc93  | 304743 |
| 9.195194   | up | XM_001070408 | Ccdc97  | 292724 |
| 2.6038368  | up | NM_031530    | Ccl2    | 24770  |
| 3.325593   | up | NM_001008513 | Ccl21b  | 298006 |
| 4.147306   | up | NM_001013045 | Ccl24   | 288593 |
| 2.1743116  | up | NM_001004202 | Ccl6    | 287910 |
| 5.901844   | up | XM_001058860 | Ccnc    | 114839 |
| 8.160855   | up | NM_001013204 | Ccndbp1 | 362201 |
| 115.8949   | up | NM_012923    | Ccng1   | 25405  |
| 20.464033  | up | XM_001063045 | Ccng2   | 29157  |
| 2.5878708  | up | NM_052981    | Ccnh    | 84389  |
| 4.230724   | up | NM_053662    | Ccnl1   | 114121 |
| 6.51954    | up | NM_001013094 | Ccnl2   | 298686 |
| 5.85205    | up | XM_222617    | Ccnt2   | 304758 |
| 12.946275  | up | XM_001065252 | Ccny    | 361261 |
| 22.53303   | up | XM_001053208 | Ccpg1   | 363098 |
| 4.988872   | up | NM_001025752 | Ccrk    | 364666 |
| 2.1144006  | up | XM_001076293 | Ccr12   | 316019 |
| 8.102286   | up | NM_053425    | Ccs     | 84485  |
| 42.7172    | up | NM_001005905 | Cct2    | 299809 |
| 102.686325 | up | NM_199091    | Cct3    | 295230 |
| 44.91495   | up | NM_182814    | Cct4    | 29374  |
| 79.74785   | up | NM_001004078 | Cct5    | 294864 |
| 85.09993   | up | XM_001073942 | Cct7    | 297406 |
| 89.67262   | up | XM_001067000 | Cct8    | 288305 |



|           |    |              |          |        |
|-----------|----|--------------|----------|--------|
| 2.0531044 | up | NM_021744    | Cd14     | 60350  |
| 67.91685  | up | NM_022523    | Cd151    | 64315  |
| 2.7371173 | up | XM_001061914 | Cd163    | 312701 |
| 22.058336 | up | NM_031812    | Cd164    | 83689  |
| 5.0199065 | up | NM_017079    | Cd1d1    | 25109  |
| 3.31513   | up | NM_031518    | Cd200    | 24560  |
| 125.06201 | up | NM_012752    | Cd24     | 25145  |
| 3.7762468 | up | XM_001069761 | Cd248    | 293669 |
| 2.9095812 | up | NM_181475    | Cd2ap    | 316258 |
| 95.56574  | up | NM_031561    | Cd36     | 29184  |
| 2.9368775 | up | NM_017124    | Cd37     | 29185  |
| 5.9559345 | up | NM_019195    | Cd47     | 29364  |
| 6.838255  | up | NM_139103    | Cd48     | 245962 |
| 4.8423815 | up | NM_022269    | Cd55     | 64036  |
| 44.7832   | up | NM_012925    | Cd59     | 25407  |
| 472.81027 | up | NM_017125    | Cd63     | 29186  |
| 19.92722  | up | NM_001031638 | Cd68     | 287435 |
| 17.219    | up | NM_013069    | Cd74     | 25599  |
| 14.805586 | up | NM_053018    | Cd9      | 24936  |
| 48.8424   | up | NM_001012164 | Cd97     | 361383 |
| 2.6943119 | up | NM_134459    | Cd99I2   | 171485 |
| 18.30737  | up | NM_001012156 | Cdadc1   | 361052 |
| 2.0588112 | up | XM_001080911 | Cdan1    | 311348 |
| 17.041716 | up | NM_053877    | Cdc123   | 116656 |
| 4.9082522 | up | XM_001073065 | Cdc14a   | 310806 |
| 12.665949 | up | NM_001024744 | Cdc16    | 290875 |
| 8.731294  | up | NM_133571    | Cdc25a   | 171102 |
| 8.188706  | up | NM_001013240 | Cdc26    | 366381 |
| 2.7394168 | up | XM_001053539 | Cdc2I5   | 306998 |
| 8.366453  | up | NM_001011941 | Cdc37I1  | 293886 |
| 4.618226  | up | XM_342154    | Cdc40    | 361859 |
| 170.5083  | up | NM_171994    | Cdc42    | 64465  |
| 2.7964385 | up | NM_001009689 | Cdc42ep2 | 309175 |
| 5.5197883 | up | NM_001039044 | Cdc42se1 | 499672 |
| 19.675259 | up | NM_053527    | Cdc51    | 85434  |
| 6.241849  | up | NM_001024769 | Cdc73    | 304832 |
| 3.0179    | up | NM_001037214 | Cdca4    | 500727 |
| 36.624775 | up | NM_138889    | Cdh13    | 192248 |
| 10.030221 | up | XM_001057656 | Cdh5     | 307618 |
| 3.2402925 | up | NM_138899    | Cdipt    | 192260 |
| 2.0954094 | up | NM_001025722 | Cdk10    | 361434 |
| 7.618134  | up | XM_341076    | Cdk2ap1  | 360804 |
| 15.342617 | up | XM_001069623 | Cdk2ap2  | 688405 |
| 25.010014 | up | NM_053593    | Cdk4     | 94201  |

|           |    |              |          |        |
|-----------|----|--------------|----------|--------|
| 3.7034216 | up | NM_080885    | Cdk5     | 140908 |
| 8.465618  | up | NM_145721    | Cdk5rap1 | 252827 |
| 3.349721  | up | XM_001058949 | Cdk5rap2 | 286919 |
| 7.933959  | up | NM_024488    | Cdk5rap3 | 80278  |
| 5.3679233 | up | XM_001071127 | Cdk7     | 171150 |
| 2.0545156 | up | NM_001007743 | Cdk9     | 362110 |
| 9.339441  | up | XM_001061875 | Cdkal1   | 361243 |
| 27.369062 | up | NM_080782    | Cdkn1a   | 114851 |
| 6.5586305 | up | NM_001014000 | Cdkn2aip | 306455 |
| 2.9257338 | up | NM_001037543 | Cdnf     | 361276 |
| 2.6659768 | up | NM_052809    | Cdo1     | 81718  |
| 65.247086 | up | NM_001014097 | Cdv3     | 315970 |
| 2.7234313 | up | NM_001014145 | Cdyl     | 361237 |
| 2.7298281 | up | XM_001078221 | Cdyl2    | 292044 |
| 3.6250856 | up | NM_024125    | Cebpb    | 24253  |
| 8.359068  | up | NM_013154    | Cebpd    | 25695  |
| 10.328476 | up | NM_012831    | Cebpg    | 25301  |
| 6.718985  | up | XM_001059054 | Cebpz    | 362686 |
| 2.0003226 | up | XM_001058617 | Cecr5    | 312680 |
| 5.3363137 | up | NM_001008366 | Cenpn    | 361416 |
| 4.9000325 | up | XM_577104    | Cenpv    | 501702 |
| 5.729021  | up | XM_001066167 | Centd3   | 361314 |
| 3.1762292 | up | XM_001073869 | Cep57    | 315423 |
| 2.9721305 | up | NM_001037772 | Cep63    | 300963 |
| 6.271549  | up | XM_001067027 | Cep76    | 291540 |
| 6.9029512 | up | NM_001007699 | Cept1    | 310773 |
| 11.884252 | up | XM_001061358 | Cetn3    | 170895 |
| 2.0391939 | up | NM_001077642 | Cfd      | 54249  |
| 5.065846  | up | NM_199378    | Cfdp1    | 292027 |
| 9.887448  | up | NM_130409    | Cfh      | 155012 |
| 19.404205 | up | NM_017147    | Cfl1     | 29271  |
| 77.22207  | up | XM_001079054 | Cfl2     | 366624 |
| 9.208987  | up | NM_001033864 | Cflar    | 117279 |
| 9.481672  | up | NM_053899    | Cgrrf1   | 116679 |
| 4.2927327 | up | XM_001080834 | Chac1    | 362196 |
| 2.2001092 | up | XM_001054484 | Chac2    | 360994 |
| 3.2025077 | up | XM_001061702 | Chaf1a   | 363333 |
| 41.37581  | up | NM_001007008 | Chchd10  | 361824 |
| 34.029705 | up | NM_001015019 | Chchd2   | 316643 |
| 60.704067 | up | XM_001066573 | Chchd3   | 296966 |
| 6.494862  | up | XM_001078868 | Chchd5   | 296147 |
| 2.0765626 | up | XM_001072660 | Chchd6   | 297436 |
| 2.286408  | up | XM_238731    | Chd1     | 308215 |
| 2.8777342 | up | XM_001060704 | Chd11    | 310707 |

|           |    |              |          |        |
|-----------|----|--------------|----------|--------|
| 62.97613  | up | XM_001063352 | Chd4     | 117535 |
| 5.9007263 | up | XM_001071315 | Chd7     | 312974 |
| 2.8865972 | up | NM_053560    | Chi3l1   | 89824  |
| 9.508309  | up | XM_001076614 | Chic2    | 83835  |
| 6.9421225 | up | NM_001047854 | Chid1    | 293628 |
| 10.771304 | up | NM_017177    | Chkb     | 29367  |
| 4.335953  | up | NM_017067    | Chm      | 24942  |
| 36.20636  | up | XM_001055138 | Chmp2a   | 365191 |
| 8.131731  | up | XM_001063932 | Chmp2b   | 363720 |
| 5.59728   | up | XM_001054829 | Chmp4b1l | 679886 |
| 4.1614585 | up | NM_001025410 | Chmp5    | 297995 |
| 2.9045954 | up | XM_001069293 | Chmp7    | 364419 |
| 8.479533  | up | XM_001075005 | Chordc1  | 315447 |
| 14.045393 | up | NM_024139    | Chp      | 64152  |
| 5.78803   | up | XM_001059575 | Chrd     | 117275 |
| 155.67854 | up | NM_024485    | Chrna1   | 79557  |
| 25.905964 | up | NM_019298    | Chrnd    | 54240  |
| 6.236061  | up | NM_017194    | Chrne    | 29422  |
| 37.022354 | up | NM_019145    | Chrng    | 25753  |
| 3.331971  | up | NM_001037775 | Chst12   | 304322 |
| 2.5169733 | up | XM_001061709 | Chuk     | 309361 |
| 20.129736 | up | NM_001008766 | Ciao1    | 29231  |
| 18.692673 | up | NM_001007689 | Ciapin1  | 307649 |
| 8.416794  | up | XM_214551    | Cidea    | 291541 |
| 32.26614  | up | XM_001076441 | Cilp     | 315761 |
| 2.2892995 | up | XM_001071553 | Cinp     | 299334 |
| 6.2875385 | up | NM_001007799 | Cir1     | 362149 |
| 3.7153103 | up | NM_031147    | Cirbp    | 81825  |
| 8.896402  | up | NM_001009640 | Cirh1a   | 291987 |
| 11.169317 | up | XM_001073750 | Cisd1    | 294362 |
| 6.27585   | up | XM_001077768 | Cisd2    | 295457 |
| 35.562317 | up | NM_053698    | Cited2   | 114490 |
| 17.597733 | up | XM_001079943 | Ciz1     | 296639 |
| 3.328036  | up | XM_001079545 | Ckap4    | 362859 |
| 5.8631377 | up | XM_001068589 | Ckap5    | 311191 |
| 5.085857  | up | NM_012529    | Ckb      | 24264  |
| 86.64652  | up | NM_012530    | Ckm      | 24265  |
| 7.6111474 | up | NM_053722    | Clasp2   | 114514 |
| 23.541286 | up | NM_053363    | Clcn3    | 84360  |
| 40.106064 | up | NM_022198    | Clcn4-2  | 60586  |
| 20.998333 | up | NM_031701    | Cldn5    | 65131  |
| 10.706383 | up | NM_022393    | Clec10a  | 64195  |
| 7.9611726 | up | NM_001002807 | Clic1    | 406864 |
| 2.8191454 | up | NM_001009651 | Clic2    | 294141 |

|           |    |              |         |        |
|-----------|----|--------------|---------|--------|
| 2.1330311 | up | NM_001002022 | Clint1  | 360515 |
| 10.850651 | up | NM_031745    | Clip1   | 65201  |
| 9.501891  | up | NM_001013942 | Clip4   | 298801 |
| 34.823406 | up | XM_001063325 | Clk1    | 301434 |
| 5.9368863 | up | NM_001014254 | Clk2    | 365842 |
| 6.0169015 | up | NM_134340    | Clk3    | 171305 |
| 14.923058 | up | NM_001013041 | Clk4    | 287269 |
| 4.5647006 | up | XM_001074158 | Cln6    | 315746 |
| 3.0436008 | up | NM_001007686 | Cln8    | 306619 |
| 14.541622 | up | NM_031719    | Clns1a  | 65160  |
| 2.6820843 | up | NM_021856    | Clock   | 60447  |
| 4.792034  | up | NM_001009599 | Clp1    | 311166 |
| 14.040102 | up | NM_022947    | Clpb    | 65041  |
| 12.003879 | up | XM_001055676 | Clpp    | 301117 |
| 30.92172  | up | XM_001067335 | Clptm1  | 292696 |
| 13.097498 | up | XM_001056887 | Clptm11 | 316916 |
| 36.940216 | up | NM_001007803 | Clpx    | 300786 |
| 8.53191   | up | NM_019299    | Cltc    | 54241  |
| 30.687202 | up | NM_053021    | Clu     | 24854  |
| 4.0020075 | up | NM_001008770 | Cmb1    | 310201 |
| 7.3592467 | up | XM_001077986 | Cmc1    | 363162 |
| 3.6667593 | up | NM_001025655 | Cmpk1   | 298410 |
| 123.5596  | up | NM_022598    | Cnbp    | 64530  |
| 28.436686 | up | NM_001010920 | Cndp2   | 291394 |
| 5.0951223 | up | XM_001062581 | Cnih4   | 289324 |
| 10.250109 | up | NM_001039011 | Cnksr1  | 298545 |
| 5.6593657 | up | NM_019359    | Cnn3    | 54321  |
| 4.505202  | up | XM_001063389 | Cno     | 364183 |
| 16.239101 | up | XM_001056829 | Cnot1   | 291841 |
| 5.2429404 | up | NM_001007003 | Cnot10  | 316034 |
| 18.387878 | up | NM_001011988 | Cnot2   | 299805 |
| 24.80612  | up | NM_001037782 | Cnot4   | 312227 |
| 4.4464226 | up | NM_001013856 | Cnot6   | 287249 |
| 3.2392614 | up | XM_001058225 | Cnot7   | 306492 |
| 2.3881269 | up | NM_012809    | Cnp     | 25275  |
| 30.241064 | up | NM_001077585 | Cnpy2   | 685814 |
| 2.668859  | up | NM_001014232 | Cnrip1  | 364208 |
| 3.9426458 | up | XM_001060344 | Cnst    | 498297 |
| 2.874506  | up | NM_013166    | Cntf    | 25707  |
| 3.1899745 | up | NM_001003929 | Cntfr   | 313173 |
| 5.4623456 | up | XM_001072175 | Cobra1  | 311796 |
| 15.737337 | up | XM_001075681 | Cog4    | 361407 |
| 7.9708567 | up | NM_001004262 | Cog6    | 310411 |
| 35.38938  | up | XM_001074828 | Cog8    | 291990 |

|            |    |              |         |        |
|------------|----|--------------|---------|--------|
| 4.1996794  | up | NM_017360    | Coil    | 50998  |
| 8.16884    | up | XM_001081230 | Col1a1  | 29393  |
| 30.168715  | up | NM_053356    | Col1a2  | 84352  |
| 43.611385  | up | NM_032085    | Col3a1  | 84032  |
| 31.798918  | up | XM_001067473 | Col4a1  | 290905 |
| 14.418434  | up | XM_001076134 | Col4a2  | 306628 |
| 2.4155078  | up | XM_001055156 | Col4a5  | 363457 |
| 6.872646   | up | NM_134452    | Col5a1  | 85490  |
| 5.1550736  | up | XM_001061982 | Col5a2  | 85250  |
| 10.6175785 | up | XM_001079642 | Col6a2  | 361821 |
| 8.407541   | up | XM_001068252 | Col6a3  | 367313 |
| 2.339867   | up | NM_019274    | Colq    | 29755  |
| 5.537376   | up | NM_001004276 | Commd10 | 361323 |
| 9.3822365  | up | NM_198732    | Commd3  | 291339 |
| 11.754261  | up | XM_001074149 | Commd4  | 363068 |
| 4.610896   | up | NM_001033692 | Commd9  | 295956 |
| 2.3476143  | up | XM_001065422 | Comtd1  | 305685 |
| 12.744287  | up | NM_080781    | Copb1   | 114023 |
| 8.117743   | up | XM_001068587 | Cope    | 290659 |
| 14.070874  | up | NM_153297    | Cops2   | 261736 |
| 82.79271   | up | NM_001004200 | Cops3   | 287367 |
| 4.381929   | up | NM_001004275 | Cops4   | 360915 |
| 34.692245  | up | NM_001025695 | Cops5   | 312916 |
| 22.59242   | up | XM_001066309 | Cops6   | 304343 |
| 25.231167  | up | NM_001047098 | Cops7a  | 312710 |
| 2.4076877  | up | XM_001064503 | Cops7b  | 363273 |
| 22.416548  | up | NM_001013227 | Cops8   | 363283 |
| 3.7452233  | up | XM_001069027 | Copz1   | 315345 |
| 92.955536  | up | XM_001081315 | Copz2   | 360611 |
| 43.49864   | up | NM_001044255 | Coq2    | 498332 |
| 11.201948  | up | NM_019187    | Coq3    | 29309  |
| 8.673856   | up | NM_001011983 | Coq6    | 299195 |
| 4.0290613  | up | NM_001035257 | Coq9    | 498909 |
| 3.1686523  | up | NM_130411    | Coro1a  | 155151 |
| 38.576466  | up | NM_139115    | Coro6   | 245982 |
| 2.1458266  | up | XM_001077234 | Coro7   | 192276 |
| 2.154971   | up | XM_001078708 | Cotl1   | 361422 |
| 2.0994322  | up | XM_001074020 | Cox11   | 690300 |
| 20.340193  | up | NM_001033699 | Cox15   | 309391 |
| 2.1515925  | up | NM_053540    | Cox17   | 89786  |
| 8.546109   | up | XM_001072704 | Cox18   | 289522 |
| 7.87649    | up | XM_001074417 | Cox19   | 304330 |
| 57.5805    | up | NM_017202    | Cox4i1  | 29445  |
| 5.6267486  | up | NM_001012165 | Cox4nb  | 361425 |

|            |    |              |         |        |
|------------|----|--------------|---------|--------|
| 127.948944 | up | NM_145783    | Cox5a   | 252934 |
| 29.524828  | up | NM_053586    | Cox5b   | 94194  |
| 21.163568  | up | NM_012814    | Cox6a1  | 25282  |
| 156.01904  | up | NM_012812    | Cox6a2  | 25278  |
| 9.203441   | up | XM_001071713 | Cox6b1  | 502592 |
| 13.856096  | up | NM_019360    | Cox6c   | 54322  |
| 2.4087033  | up | NM_173303    | Cox6c1  | 286962 |
| 28.105246  | up | NM_022503    | Cox7a2  | 29507  |
| 7.298852   | up | XM_001056904 | Cox7a2l | 298762 |
| 69.00015   | up | NM_182819    | Cox7b   | 303393 |
| 68.0105    | up | NM_012786    | Cox8b   | 25250  |
| 4.4564185  | up | NM_012836    | Cpd     | 25306  |
| 4.1615205  | up | NM_013128    | Cpe     | 25669  |
| 6.017639   | up | XM_001080170 | Cpeb3   | 309510 |
| 9.323474   | up | XM_001064017 | Cpeb4   | 303010 |
| 2.4870894  | up | XM_001062196 | Cpne2   | 291861 |
| 2.3370073  | up | XM_001057562 | Cpne3   | 313087 |
| 6.5500736  | up | XM_001075234 | Cpsf1   | 366952 |
| 30.993057  | up | NM_001030030 | Cpsf3   | 298916 |
| 3.7641869  | up | NM_001033892 | Cpsf3l  | 298688 |
| 5.4039216  | up | XM_001080973 | Cpsf6   | 299811 |
| 3.8855965  | up | NM_001014245 | Cpsf7   | 365407 |
| 144.49237  | up | NM_013200    | Cpt1b   | 25756  |
| 6.273811   | up | NM_012930    | Cpt2    | 25413  |
| 3.3904786  | up | XM_001054321 | Cpxm2   | 293566 |
| 7.9852753  | up | NM_001005265 | Cr1l    | 54243  |
| 2.4247987  | up | XM_001080418 | Cradd   | 314756 |
| 312.9088   | up | NM_001004085 | Crat    | 311849 |
| 9.814938   | up | NM_001015003 | Crbn    | 297498 |
| 9.173784   | up | NM_053670    | Crcp    | 114205 |
| 18.763306  | up | NM_001013092 | Creb3   | 298400 |
| 2.7000895  | up | XM_001062098 | Crebzf  | 293112 |
| 8.132166   | up | XM_001075616 | Creg1   | 289185 |
| 7.018107   | up | NM_001024783 | Creld1  | 312638 |
| 4.491788   | up | NM_001037208 | Creld2  | 362978 |
| 2.3454204  | up | NM_013086    | Crem    | 25620  |
| 103.682884 | up | XM_001064272 | Crim1   | 298744 |
| 11.845988  | up | NM_019907    | Cript   | 56725  |
| 2.1511254  | up | NM_138916    | Crkrs   | 192350 |
| 3.8606632  | up | XM_001080961 | Crlf3   | 54395  |
| 14.5643015 | up | NM_001014258 | Crls1   | 366196 |
| 8.105855   | up | NM_053797    | Crnkl1  | 116481 |
| 2.438559   | up | NM_001033895 | Crtc2   | 310615 |
| 3.406118   | up | NM_133405    | Cry2    | 170917 |

|           |    |              |            |        |
|-----------|----|--------------|------------|--------|
| 2.4046028 | up | NM_175757    | Cry1l      | 290277 |
| 8.129669  | up | NM_001013044 | Cryz1l     | 288256 |
| 80.866516 | up | NM_130755    | Cs         | 170587 |
| 196.21747 | up | NM_031979    | Csda       | 83807  |
| 29.719015 | up | NM_054006    | Csde1      | 117180 |
| 2.0229056 | up | NM_001029901 | Csf1r      | 307403 |
| 5.270346  | up | XM_001056935 | Csgalnact2 | 297554 |
| 59.019688 | up | NM_053615    | Csnk1a1    | 113927 |
| 8.160327  | up | NM_031617    | Csnk1e     | 58822  |
| 20.552734 | up | NM_001033870 | Csnk1g2    | 65278  |
| 4.088149  | up | NM_022855    | Csnk1g3    | 64823  |
| 30.899601 | up | NM_001035238 | Csnk2b     | 81650  |
| 2.5035596 | up | XM_001060285 | Cspp1      | 362472 |
| 2.716615  | up | NM_017148    | Csrp1      | 29276  |
| 5.5134377 | up | XM_001054440 | Csrp2bp    | 362224 |
| 50.973103 | up | NM_057144    | Csrp3      | 117505 |
| 41.337467 | up | NM_012837    | Cst3       | 25307  |
| 9.314902  | up | XM_001056457 | Cst7       | 296257 |
| 11.545439 | up | NM_012838    | Cstb       | 25308  |
| 3.4082983 | up | XM_001068092 | Cstf2      | 683927 |
| 2.6558013 | up | NM_001077672 | Cstf3      | 362178 |
| 29.631828 | up | NM_019201    | Ctbp1      | 29382  |
| 8.761196  | up | NM_053335    | Ctbp2      | 81717  |
| 2.1001241 | up | NM_031023    | Ctbs       | 81652  |
| 26.765892 | up | XM_001058378 | Ctdp1      | 291414 |
| 3.6049063 | up | XM_001077330 | Ctdspl     | 301056 |
| 7.553417  | up | NM_022266    | Ctgf       | 64032  |
| 20.643759 | up | NM_001007145 | Ctnna1     | 307505 |
| 7.4160266 | up | XM_001059679 | Ctnnal1    | 298019 |
| 7.170866  | up | XM_001075213 | Ctnnbip1   | 503000 |
| 4.199721  | up | NM_001024870 | Ctnnb1l    | 296320 |
| 12.125343 | up | XM_001053648 | Ctps       | 313560 |
| 6.546154  | up | XM_001077817 | Ctr9       | 293184 |
| 15.861689 | up | NM_001011959 | Ctsa       | 296370 |
| 10.734612 | up | NM_017097    | Ctsc       | 25423  |
| 11.175459 | up | NM_134334    | Ctsd       | 171293 |
| 2.7396216 | up | NM_001034110 | Ctsf       | 361704 |
| 37.353195 | up | NM_012939    | Ctsh       | 25425  |
| 97.64516  | up | NM_013156    | Ctsl1      | 25697  |
| 6.9041677 | up | NM_017320    | Ctss       | 50654  |
| 22.898617 | up | NM_183330    | Ctsz       | 252929 |
| 5.339244  | up | NM_021868    | Ctn        | 60465  |
| 20.179745 | up | NM_001013971 | Cuedc1     | 303419 |
| 6.73863   | up | NM_001079886 | Cuedc2     | 294009 |

|           |    |              |         |        |
|-----------|----|--------------|---------|--------|
| 15.595758 | up | NM_001025421 | Cugbp1  | 362160 |
| 6.1538367 | up | NM_001083586 | Cugbp2  | 29428  |
| 33.508846 | up | XM_001069456 | Cul1    | 362356 |
| 32.119812 | up | XM_001057445 | Cul2    | 361258 |
| 3.520133  | up | XM_001063669 | Cul3    | 301555 |
| 3.2302954 | up | NM_022683    | Cul5    | 64624  |
| 3.6710908 | up | XM_001063728 | Cul9    | 316228 |
| 22.46775  | up | NM_212494    | Cuta    | 294288 |
| 14.599508 | up | XM_001060579 | Cutc    | 361760 |
| 3.044315  | up | XM_001070410 | Cux1    | 116639 |
| 30.72     | up | NM_001024987 | Cwc15   | 300361 |
| 3.1177204 | up | NM_139089    | Cxcl10  | 245920 |
| 3.7660136 | up | NM_001033882 | Cxcl12  | 24772  |
| 11.143226 | up | NM_001013137 | Cxcl14  | 306748 |
| 3.0393105 | up | NM_001017478 | Cxcl16  | 497942 |
| 4.2695026 | up | NM_145672    | Cxcl9   | 246759 |
| 3.636117  | up | NM_022205    | Cxcr4   | 60628  |
| 6.4653864 | up | NM_022245    | Cyb5a   | 64001  |
| 6.8454914 | up | NM_030586    | Cyb5b   | 80773  |
| 90.19974  | up | NM_001013126 | Cyb5r1  | 304805 |
| 6.0508485 | up | NM_001014244 | Cyb5r2  | 365345 |
| 11.854248 | up | NM_138877    | Cyb5r3  | 25035  |
| 4.440033  | up | NM_133427    | Cyb5r4  | 171015 |
| 2.0615273 | up | NM_024160    | Cyba    | 79129  |
| 3.56996   | up | XM_001059652 | Cyc1    | 300047 |
| 2.3401525 | up | NM_012839    | Cyes    | 25309  |
| 8.6782465 | up | XM_001054108 | Cyfip1  | 308666 |
| 2.6967208 | up | XM_001058247 | Cyld    | 312937 |
| 5.864506  | up | NM_199401    | Cyp20a1 | 316435 |
| 2.087533  | up | NM_178847    | Cyp27a1 | 301517 |
| 2.213298  | up | NM_023025    | Cyp2j4  | 65210  |
| 2.233753  | up | NM_016999    | Cyp4b1  | 24307  |
| 2.815618  | up | XM_576190    | Cyp4f17 | 500801 |
| 34.176067 | up | NM_031327    | Cyr61   | 83476  |
| 2.467084  | up | NM_053911    | Cyth2   | 116692 |
| 4.7426805 | up | NM_001039455 | Cytsa   | 361828 |
| 2.3084812 | up | XM_001080564 | Daam1   | 314212 |
| 3.1420856 | up | NM_024159    | Dab2    | 79128  |
| 8.773282  | up | NM_138910    | Dad1    | 192275 |
| 3.234583  | up | XM_001072224 | Daglb   | 304289 |
| 49.467266 | up | NM_001014214 | Dalrd3  | 363146 |
| 6.3446903 | up | NM_022526    | Dap     | 64322  |
| 10.076181 | up | NM_001011950 | Dap3    | 295238 |
| 5.2128105 | up | XM_001060919 | Dapk1   | 306722 |



|           |    |              |         |        |
|-----------|----|--------------|---------|--------|
| 6.059432  | up | NM_022546    | Dapk3   | 64391  |
| 11.424552 | up | NM_053799    | Dars    | 116483 |
| 3.575912  | up | NM_001034143 | Dars2   | 304919 |
| 4.990488  | up | NM_080891    | Daxx    | 140926 |
| 14.666377 | up | NM_001013107 | Dazap2  | 300235 |
| 21.898495 | up | NM_031853    | Dbi     | 25045  |
| 2.9919918 | up | NM_031352    | Dbnl    | 83527  |
| 50.491344 | up | NM_012543    | Dbp     | 24309  |
| 4.9818625 | up | XM_001058421 | Dbr1    | 681234 |
| 3.688839  | up | XM_001073131 | Dbt     | 29611  |
| 5.288455  | up | NM_001009686 | Dcaf11  | 305895 |
| 3.2056837 | up | XM_001056278 | Dcaf4   | 362762 |
| 24.963007 | up | XM_001071288 | Dcaf6   | 289181 |
| 3.5056915 | up | NM_001007724 | Dcakd   | 360639 |
| 53.25532  | up | NM_017306    | Dci     | 29740  |
| 6.2349544 | up | NM_053343    | Dclk1   | 83825  |
| 7.8380213 | up | XM_001063735 | Dclre1a | 292127 |
| 62.008347 | up | NM_024129    | Dcn     | 29139  |
| 2.3066683 | up | XM_001057512 | Dcp1b   | 500305 |
| 18.038834 | up | NM_153302    | Dcps    | 266605 |
| 6.7752714 | up | NM_024130    | Dctn1   | 29167  |
| 23.186987 | up | NM_001004239 | Dctn2   | 299850 |
| 6.244371  | up | NM_053404    | Dctn4   | 84428  |
| 11.834647 | up | NM_001037778 | Dctn5   | 308961 |
| 31.27587  | up | XM_001059405 | Dctn6   | 290798 |
| 2.3516357 | up | XM_001067883 | Dcun1d1 | 310324 |
| 2.7509327 | up | XM_001068808 | Dcun1d2 | 688913 |
| 3.334473  | up | NM_001024886 | Dcun1d3 | 309035 |
| 5.669425  | up | NM_001009696 | Dcun1d5 | 315405 |
| 2.2486556 | up | NM_199403    | Dd25    | 360863 |
| 3.9493    | up | NM_212532    | Ddah2   | 294239 |
| 2.339397  | up | NM_001034149 | Ddi2    | 313668 |
| 2.241766  | up | NM_080399    | Ddit4l  | 140582 |
| 39.397552 | up | NM_001012104 | Ddost   | 313648 |
| 2.2529137 | up | NM_013137    | Ddr1    | 25678  |
| 7.8547926 | up | XM_001065242 | Ddr2    | 685781 |
| 77.549225 | up | XM_001081180 | Ddrgk1  | 296162 |
| 114.85998 | up | NM_024131    | Ddt     | 29318  |
| 103.68748 | up | NM_053414    | Ddx1    | 84474  |
| 4.4987054 | up | XM_235480    | Ddx17   | 315133 |
| 2.8210907 | up | NM_001005381 | Ddx19a  | 292022 |
| 5.410443  | up | NM_001037201 | Ddx21   | 317399 |
| 18.14988  | up | XM_001060655 | Ddx23   | 300208 |
| 18.953556 | up | NM_199119    | Ddx24   | 373065 |

|           |    |              |         |        |
|-----------|----|--------------|---------|--------|
| 13.561609 | up | XM_001075340 | Ddx27   | 362274 |
| 5.6037664 | up | XM_001076081 | Ddx28   | 364995 |
| 4.0938525 | up | XM_001079220 | Ddx31   | 311835 |
| 12.887377 | up | NM_053563    | Ddx39   | 89827  |
| 30.683641 | up | XM_001060162 | Ddx3x   | 317335 |
| 3.8955057 | up | XM_001064233 | Ddx41   | 314336 |
| 52.086357 | up | NM_139098    | Ddx46   | 245957 |
| 65.73583  | up | NM_001007613 | Ddx5    | 287765 |
| 2.0113418 | up | XM_001080674 | Ddx51   | 304570 |
| 4.420295  | up | NM_053525    | Ddx52   | 85432  |
| 3.6265357 | up | XM_001079855 | Ddx54   | 360815 |
| 2.3583364 | up | XM_001067411 | Ddx58   | 297989 |
| 2.133376  | up | XM_001071010 | Deadc1  | 361453 |
| 12.379829 | up | NM_057197    | Decr1   | 117543 |
| 11.923687 | up | NM_001004255 | Dek     | 306817 |
| 3.9090805 | up | XM_001066914 | Dennd1b | 289051 |
| 19.696602 | up | XM_001073504 | Dennd5a | 308942 |
| 4.1029706 | up | XM_001065993 | Depdc5  | 305464 |
| 7.4471254 | up | XM_001079920 | Derl2   | 691956 |
| 49.367943 | up | NM_022531    | Des     | 64362  |
| 7.542408  | up | NM_001037194 | Det1    | 308775 |
| 6.026564  | up | XM_001078444 | Dexi    | 497857 |
| 2.367773  | up | NM_001012472 | Dgcr14  | 360741 |
| 2.3481236 | up | XM_001065223 | Dgcr6   | 303794 |
| 3.9107437 | up | XM_001064513 | Dgcr8   | 287954 |
| 8.20417   | up | NM_080787    | Dgka    | 140866 |
| 6.887165  | up | XM_001068249 | Dguok   | 297389 |
| 2.0037742 | up | NM_001011978 | Dhdds   | 298541 |
| 20.059237 | up | NM_001004207 | Dhps    | 288923 |
| 4.4999456 | up | NM_001014119 | Dhrs11  | 360583 |
| 11.938601 | up | NM_153315    | Dhrs4   | 266686 |
| 6.5056386 | up | NM_001008507 | Dhrs7b  | 287380 |
| 40.08466  | up | XM_001078936 | Dhrs7c  | 287411 |
| 4.1742864 | up | XM_213723    | Dhrsx   | 288525 |
| 26.649769 | up | XM_001054651 | Dhx15   | 289693 |
| 15.042342 | up | NM_212496    | Dhx16   | 294232 |
| 3.9328325 | up | NM_001013249 | Dhx30   | 367172 |
| 2.9424906 | up | XM_001078816 | Dhx37   | 288647 |
| 3.2917242 | up | NM_001005873 | Dhx40   | 287595 |
| 3.2826054 | up | XM_001062787 | Dhx57   | 366532 |
| 3.2102568 | up | XM_001081462 | Dhx58   | 303538 |
| 3.9366288 | up | NM_001047844 | Dhx8    | 287727 |
| 5.2796493 | up | NM_001008292 | Diablo  | 288753 |
| 2.3318148 | up | XM_001068155 | Dicer1  | 299284 |

|           |    |              |          |        |
|-----------|----|--------------|----------|--------|
| 3.3359015 | up | XM_001065350 | Dimt11   | 294718 |
| 2.7607126 | up | XM_001073902 | Dis3     | 306103 |
| 2.0587316 | up | NM_001008380 | Dis3l    | 363077 |
| 11.909129 | up | NM_133419    | Dkc1     | 170944 |
| 6.8344455 | up | NM_031025    | Dlat     | 81654  |
| 27.664204 | up | NM_199385    | Dld      | 298942 |
| 7.138936  | up | NM_012788    | Dlg1     | 25252  |
| 28.206076 | up | NM_001006981 | Dlst     | 299201 |
| 4.9418244 | up | NM_001015006 | Dmap1    | 298447 |
| 3.0840495 | up | XM_577842    | Dmbt1    | 170568 |
| 6.186767  | up | NM_001005244 | Dmd      | 24907  |
| 10.419917 | up | XM_001066025 | Dmpk     | 308405 |
| 9.872541  | up | XM_001080139 | Dmrt2    | 309430 |
| 3.2205164 | up | NM_053693    | Dmtf1    | 114485 |
| 3.7089806 | up | XM_001054434 | Dmxl1    | 307429 |
| 3.8192606 | up | NM_022934    | Dnaja1   | 65028  |
| 5.8948417 | up | NM_032079    | Dnaja2   | 84026  |
| 20.839537 | up | NM_001038595 | Dnaja3   | 360481 |
| 14.20258  | up | XM_001069407 | Dnaja1   | 361384 |
| 13.529241 | up | NM_001015021 | Dnaja11  | 360734 |
| 5.070878  | up | NM_001013907 | Dnaja12  | 294513 |
| 2.3453126 | up | NM_001013076 | Dnaja4   | 295549 |
| 13.626656 | up | XM_001061825 | Dnaja5   | 313811 |
| 3.607048  | up | NM_001013209 | Dnaja6   | 362293 |
| 11.124341 | up | NM_012699    | Dnaja9   | 24908  |
| 8.927833  | up | XM_001063159 | Dnaja10  | 295690 |
| 11.451715 | up | XM_001076236 | Dnaja11  | 362666 |
| 5.397524  | up | XM_001072547 | Dnaja13  | 363127 |
| 13.573345 | up | XM_001072571 | Dnaja15  | 290370 |
| 7.7356772 | up | NM_001013887 | Dnaja18  | 291677 |
| 4.237259  | up | XM_342483    | Dnaja24  | 362184 |
| 3.774616  | up | XM_001077538 | Dnaja30  | 368190 |
| 53.954098 | up | NM_001013196 | Dnaja4   | 361717 |
| 2.321244  | up | NM_024161    | Dnaja5   | 79130  |
| 19.34017  | up | NM_213625    | Dnaja7   | 303536 |
| 20.295422 | up | XM_001064040 | Dnaja9   | 364240 |
| 5.983137  | up | NM_001009666 | Dnal4    | 300078 |
| 103.16023 | up | NM_001014223 | Dnase111 | 363522 |
| 5.9180703 | up | NM_053655    | Dnm11    | 114114 |
| 8.472759  | up | NM_013199    | Dnm2     | 25751  |
| 10.796343 | up | NM_053354    | Dnmt1    | 84350  |
| 6.3657565 | up | NM_001024879 | Dnpep    | 301529 |
| 4.142021  | up | XM_001072013 | Dnttip1  | 171437 |
| 2.5411725 | up | XM_001073752 | Dock6    | 367039 |

|            |    |              |          |        |
|------------|----|--------------|----------|--------|
| 2.7810245  | up | NM_001025006 | Dohh     | 314644 |
| 3.280613   | up | NM_212497    | Dom3z    | 361799 |
| 5.1151915  | up | XM_001055500 | Dopey2   | 304077 |
| 13.115497  | up | NM_199388    | Dpagt1   | 300668 |
| 3.9201689  | up | XM_238462    | Dpf3     | 299186 |
| 4.7308307  | up | NM_001017449 | Dph5     | 295394 |
| 12.112689  | up | XM_001072659 | Dpm1     | 296394 |
| 3.645161   | up | NM_019252    | Dpm2     | 29640  |
| 13.592515  | up | NM_053748    | Dpp3     | 114591 |
| 5.8132205  | up | NM_031973    | Dpp7     | 83799  |
| 38.673195  | up | XM_001075075 | Dpp8     | 315758 |
| 100.06734  | up | XM_001071146 | Dpt      | 289178 |
| 2.3885372  | up | XM_001053132 | Dpy1911  | 315496 |
| 2.0308588  | up | XM_001072543 | Dpy1914  | 297824 |
| 7.86553    | up | NM_173117    | Dpy30    | 286897 |
| 2.747232   | up | XM_001057161 | Dqx1     | 680434 |
| 2.053006   | up | NM_001011914 | Dr1      | 289881 |
| 7.7779074  | up | NM_001025018 | Dram2    | 362011 |
| 17.014408  | up | NM_001077668 | Drap1    | 293674 |
| 7.6902976  | up | NM_001009685 | Drg1     | 305470 |
| 3.2078238  | up | XM_001076012 | Drg2     | 497915 |
| 2.7138276  | up | XM_001054846 | Dscr3    | 360703 |
| 2.3675125  | up | XM_001053297 | Dse      | 365583 |
| 13.229591  | up | XM_001054738 | Dst      | 316313 |
| 2.3576405  | up | NM_001033666 | Dstn     | 502674 |
| 6.6666517  | up | XM_215862    | Dstnl1   | 296197 |
| 4.3730726  | up | XM_001054053 | Dtna     | 307548 |
| 3.9372625  | up | NM_001037664 | Dtnbp1   | 641528 |
| 2.8794591  | up | XM_001068990 | Dtx2-ps1 | 688965 |
| 2.2177856  | up | XM_001055773 | Dtx3     | 500847 |
| 6.4961543  | up | XM_001071259 | Dtymk    | 301622 |
| 10.1732235 | up | XM_001057815 | Dupd1    | 361003 |
| 6.053137   | up | XM_001076110 | Dus2l    | 291978 |
| 2.8307447  | up | NM_001034923 | Dus3l    | 301122 |
| 8.317096   | up | NM_001025650 | Dusp11   | 297412 |
| 22.702885  | up | NM_001007006 | Dusp13   | 361002 |
| 8.924702   | up | XM_001061713 | Dusp22   | 361242 |
| 8.338146   | up | NM_001012352 | Dusp26   | 306527 |
| 11.98565   | up | XM_001071732 | Dusp27   | 498267 |
| 29.548288  | up | XM_001081500 | Dusp3    | 498003 |
| 2.7408986  | up | NM_053883    | Dusp6    | 116663 |
| 3.2348907  | up | NM_001040271 | Dut      | 497778 |
| 30.887226  | up | XM_001054727 | Dym      | 291433 |
| 91.380714  | up | NM_019226    | Dync1h1  | 29489  |

|           |    |              |          |        |
|-----------|----|--------------|----------|--------|
| 19.468027 | up | NM_053880    | Dync1i2  | 116659 |
| 5.2206335 | up | NM_145772    | Dync1li1 | 252902 |
| 4.8853507 | up | NM_001013940 | Dync2li1 | 298767 |
| 5.151352  | up | NM_053319    | Dynll1   | 58945  |
| 162.1404  | up | NM_131910    | Dynlrb1  | 170714 |
| 6.0798545 | up | NM_001013228 | Dynlt3   | 363448 |
| 23.17751  | up | NM_012791    | Dyrk1a   | 25255  |
| 2.6329486 | up | XM_001078118 | Dyrk1b   | 308468 |
| 83.69803  | up | XM_001069038 | Dysf     | 312492 |
| 79.8219   | up | XM_001081801 | Dysfp1   | 287881 |
| 3.4639726 | up | XM_001053473 | Dzip1    | 364475 |
| 19.051497 | up | XM_001069459 | E2f6     | 313978 |
| 2.5294743 | up | XM_001075520 | Eapp     | 299043 |
| 9.896728  | up | NM_001009665 | Ebag9    | 299864 |
| 3.5472925 | up | NM_053820    | Ebf1     | 116543 |
| 14.453445 | up | NM_001008721 | Ebna1bp2 | 114021 |
| 2.1378546 | up | NM_057137    | Ebp      | 117278 |
| 3.8931668 | up | XM_001063508 | Ebpl     | 361054 |
| 3.7706282 | up | NM_053596    | Ece1     | 94204  |
| 95.273384 | up | NM_022594    | Ech1     | 64526  |
| 2.6338818 | up | NM_001007734 | Echdc1   | 361465 |
| 28.207912 | up | NM_078623    | Echs1    | 140547 |
| 4.6793027 | up | NM_053882    | Ecm1     | 116662 |
| 2.5490167 | up | XM_342698    | Ecop     | 362374 |
| 39.652122 | up | NM_001006986 | Ecsit    | 300447 |
| 16.280397 | up | XM_001068241 | Eda2r    | 296872 |
| 2.4214509 | up | XM_001075914 | Edem1    | 297504 |
| 4.708483  | up | NM_001004230 | Edem2    | 296304 |
| 4.8013816 | up | XM_001077770 | Edf1     | 296570 |
| 7.7498164 | up | XM_001061674 | Eed      | 293104 |
| 19.317778 | up | NM_175838    | Eef1a1   | 171361 |
| 44.053406 | up | NM_012660    | Eef1a2   | 24799  |
| 4.7105303 | up | XM_001071102 | Eef1b2   | 363241 |
| 24.086817 | up | NM_001013104 | Eef1d    | 300033 |
| 7.2625756 | up | XM_001063564 | Eef1e1   | 291057 |
| 14.379252 | up | NM_001004223 | Eef1g    | 293725 |
| 437.06116 | up | NM_017245    | Eef2     | 29565  |
| 8.254339  | up | NM_012947    | Eef2k    | 25435  |
| 11.417784 | up | XM_001075510 | Eefsec   | 500255 |
| 3.4860811 | up | NM_001014088 | Eepd1    | 315500 |
| 2.2380118 | up | NM_001031648 | Efhd2    | 298609 |
| 6.406709  | up | XM_001066760 | Efr3a    | 362923 |
| 6.564814  | up | XM_001062746 | Eftud1   | 308789 |
| 8.710235  | up | XM_001081526 | Eftud2   | 287739 |

|           |    |              |          |        |
|-----------|----|--------------|----------|--------|
| 4.3581343 | up | NM_012842    | Egf      | 25313  |
| 8.169683  | up | NM_139104    | Egfl7    | 245963 |
| 4.01881   | up | NM_178334    | Egln1    | 308913 |
| 69.10277  | up | NM_001004083 | Egln2    | 308457 |
| 19.164938 | up | NM_019371    | Egln3    | 54702  |
| 13.5047   | up | NM_001025117 | Ehbp111  | 309169 |
| 9.9210615 | up | XM_001074569 | Ehd1     | 293692 |
| 5.1555915 | up | NM_001024897 | Ehd2     | 361512 |
| 8.482793  | up | NM_139324    | Ehd4     | 192204 |
| 4.436219  | up | NM_133606    | Ehhadh   | 171142 |
| 2.058307  | up | NM_212463    | Ehmt2    | 361798 |
| 6.105665  | up | NM_001025660 | Ei24     | 300514 |
| 7.4254327 | up | XM_001081454 | Eif1     | 287703 |
| 7.6316195 | up | NM_001008773 | Eif1a    | 317163 |
| 9.995291  | up | XM_001054716 | Eif1ay   | 302697 |
| 6.848189  | up | XM_001077846 | Eif1b    | 301068 |
| 22.487505 | up | XM_001058163 | Eif2a    | 502531 |
| 12.316049 | up | NM_013223    | Eif2ak1  | 27137  |
| 3.6244686 | up | XM_579433    | Eif2ak2  | 54287  |
| 2.7183638 | up | XM_001074965 | Eif2ak4  | 114859 |
| 10.713767 | up | NM_172029    | Eif2b1   | 64514  |
| 83.9747   | up | NM_032058    | Eif2b2   | 84005  |
| 24.59795  | up | NM_053950    | Eif2b4   | 117019 |
| 5.81123   | up | NM_021597    | Eif2c2   | 59117  |
| 9.437784  | up | NM_019356    | Eif2s1   | 54318  |
| 19.576998 | up | NM_199380    | Eif2s2   | 296302 |
| 27.873362 | up | XM_001056580 | Eif2s3x  | 299027 |
| 78.51802  | up | NM_001047087 | Eif3a    | 292148 |
| 20.21763  | up | NM_001031640 | Eif3b    | 288516 |
| 59.469078 | up | XM_001079906 | Eif3c    | 293484 |
| 25.516136 | up | NM_001004283 | Eif3d    | 362952 |
| 16.94735  | up | NM_001011990 | Eif3e    | 299872 |
| 84.768456 | up | XM_001072798 | Eif3f    | 293427 |
| 17.641392 | up | NM_001013095 | Eif3g    | 298700 |
| 134.39955 | up | NM_198751    | Eif3h    | 299899 |
| 47.104023 | up | XM_001061306 | Eif3i    | 682390 |
| 11.60559  | up | XM_001074873 | Eif3k    | 292762 |
| 19.175589 | up | NM_001034134 | Eif3s6ip | 300069 |
| 18.389622 | up | NM_199372    | Eif4a1   | 287436 |
| 42.94702  | up | NM_001008335 | Eif4a2   | 303831 |
| 16.133432 | up | XM_001081786 | Eif4a3   | 688288 |
| 15.968724 | up | NM_001008324 | Eif4b    | 300253 |
| 3.7774777 | up | NM_053974    | Eif4e    | 117045 |
| 40.644436 | up | XM_001081452 | Eif4e2   | 363275 |

|            |    |              |            |        |
|------------|----|--------------|------------|--------|
| 4.1744013  | up | XM_001077522 | Eif4e3     | 297481 |
| 2.8220382  | up | NM_053857    | Eif4ebp1   | 116636 |
| 23.822023  | up | XM_001066327 | Eif4enif1  | 305468 |
| 19.19962   | up | XM_001060756 | Eif4g1     | 287986 |
| 29.992758  | up | XM_001072139 | Eif4g2-ps1 | 171362 |
| 10.799395  | up | XM_001062415 | Eif4g2-ps2 | 308446 |
| 124.80731  | up | XM_001070313 | Eif4g3     | 298573 |
| 10.997259  | up | NM_020075    | Eif5       | 56783  |
| 5.212151   | up | NM_001033681 | Eif5a      | 287444 |
| 4.7148824  | up | XM_001055509 | Eif5b      | 308306 |
| 3.4091094  | up | NM_001012181 | Elf2       | 361944 |
| 2.440132   | up | XM_001080272 | Elk3       | 362871 |
| 6.343751   | up | XM_001070626 | Ell        | 306347 |
| 4.845451   | up | XM_001054852 | Ell2       | 309918 |
| 2.175192   | up | XM_001072606 | Elmo2      | 362271 |
| 4.5244517  | up | NM_001013087 | Elmod3     | 297342 |
| 5.929775   | up | NM_001044275 | Elov11     | 679532 |
| 3.5889318  | up | NM_134382    | Elov15     | 171400 |
| 23.90254   | up | NM_001034145 | Elp2       | 307545 |
| 4.197559   | up | NM_022294    | Elt1       | 64124  |
| 4.0472236  | up | NM_001004228 | Emcn       | 295490 |
| 7.4128556  | up | NM_012948    | Emd        | 25437  |
| 14.758161  | up | NM_001025741 | Eml1       | 362783 |
| 2.4948714  | up | XM_001061307 | Eml4       | 313861 |
| 2.601069   | up | NM_012843    | Emp1       | 25314  |
| 6.7183056  | up | NM_030847    | Emp3       | 81505  |
| 2.4730675  | up | NM_001007557 | Emr1       | 316137 |
| 3.734067   | up | NM_001012150 | Enah       | 360891 |
| 3.779993   | up | NM_001034938 | Endog      | 362100 |
| 270.19907  | up | NM_012949    | Eno3       | 25438  |
| 6.4522343  | up | NM_053535    | Enpp1      | 85496  |
| 3.4057498  | up | NM_057104    | Enpp2      | 84050  |
| 5.6195073  | up | NM_019370    | Enpp3      | 54410  |
| 4.1980944  | up | XM_001068428 | Enpp4      | 301261 |
| 2.008869   | up | NM_001012744 | Enpp5      | 316249 |
| 32.846783  | up | NM_001033974 | Ensa       | 60334  |
| 18.421719  | up | XM_001069087 | Entpd4     | 361063 |
| 14.99627   | up | NM_199394    | Entpd5     | 314312 |
| 15.847399  | up | XM_001062411 | Eny2       | 685258 |
| 2.9984226  | up | XM_001078513 | Ep400      | 304569 |
| 2.4584484  | up | XM_001063302 | Epb4.1     | 313052 |
| 2.5533025  | up | XM_001060647 | Epb4.114a  | 307514 |
| 10.8055315 | up | XM_001055791 | Epc2       | 362132 |
| 7.071785   | up | XM_001077513 | Epc211     | 499105 |

|            |    |              |        |        |
|------------|----|--------------|--------|--------|
| 4.342083   | up | NM_001007625 | Epdr1  | 291180 |
| 52.4132    | up | NM_001024238 | Eprs   | 289352 |
| 11.387577  | up | NM_001009424 | Eps15  | 313474 |
| 2.7055845  | up | XM_001072957 | Eps8   | 312812 |
| 6.2689977  | up | NM_001013229 | Eral1  | 363646 |
| 2.2657382  | up | NM_030836    | Erap1  | 80897  |
| 10.364397  | up | NM_017003    | Erb2   | 24337  |
| 3.1800768  | up | NM_001031644 | Ercc3  | 291703 |
| 2.3138285  | up | XM_001073831 | Ercc8  | 310071 |
| 4.1777205  | up | NM_133397    | Erg    | 170909 |
| 4.9775996  | up | NM_001024984 | Ergic2 | 297728 |
| 38.34517   | up | XM_001066442 | Ergic3 | 296306 |
| 17.799181  | up | XM_001071982 | Eri3   | 313535 |
| 3.4664042  | up | XM_001075018 | Erich1 | 306622 |
| 18.250711  | up | XM_001059292 | Erlec1 | 289874 |
| 4.76343    | up | NM_184050    | Ermp1  | 373544 |
| 3.7872689  | up | NM_138528    | Ero11  | 171562 |
| 6.947916   | up | NM_001008317 | Erp44  | 298066 |
| 14.453097  | up | NM_001014071 | Errf1  | 313729 |
| 4.2535877  | up | XM_001055446 | Esco1  | 680014 |
| 45.582615  | up | XM_001071513 | Esd    | 290401 |
| 23.128311  | up | XM_001081317 | Esf1   | 366203 |
| 2.7259386  | up | NM_203336    | Esrrg  | 360896 |
| 13.254503  | up | NM_017249    | Esyt1  | 29579  |
| 21.395716  | up | NM_001008344 | Etf1   | 307503 |
| 8.308592   | up | NM_001004220 | Etfb   | 292845 |
| 27.32899   | up | NM_198742    | Etfdh  | 295143 |
| 12.44283   | up | XM_001076689 | Ethe1  | 292710 |
| 5.991896   | up | XM_001069190 | Etl4   | 291356 |
| 2.1775198  | up | XM_001053903 | Ets2   | 304063 |
| 4.923654   | up | XM_001065285 | Ewsr1  | 289752 |
| 2.7836795  | up | XM_001053206 | Exd2   | 362759 |
| 7.560633   | up | NM_001024964 | Exoc3  | 252881 |
| 3.2226472  | up | XM_001063828 | Exoc4  | 116654 |
| 3.555889   | up | NM_022204    | Exoc5  | 60627  |
| 4.784656   | up | NM_019277    | Exoc6  | 50556  |
| 5.184069   | up | XM_001077923 | Exosc2 | 366017 |
| 10.8546505 | up | XM_001071395 | Exosc3 | 313243 |
| 24.987085  | up | XM_218343    | Exosc5 | 308441 |
| 11.042989  | up | XM_001078932 | Exosc7 | 316098 |
| 4.3170047  | up | XM_001055849 | Exosc8 | 295050 |
| 12.630833  | up | NM_001025406 | Exosc9 | 294975 |
| 3.7406917  | up | XM_001065900 | Ext1   | 299907 |
| 3.260896   | up | XM_001078606 | Ext2   | 311215 |



|           |    |              |          |        |
|-----------|----|--------------|----------|--------|
| 2.4535372 | up | XM_001068341 | Extl1    | 313610 |
| 4.0482764 | up | NM_020097    | Extl3    | 56819  |
| 2.2251322 | up | XM_001054107 | Eya4     | 292172 |
| 2.5062032 | up | XM_001081456 | Ezh1     | 303547 |
| 2.4375002 | up | XM_001073768 | Ezh2     | 312299 |
| 4.374569  | up | NM_022924    | F2       | 29251  |
| 2.0862315 | up | NM_183331    | F8       | 302470 |
| 15.203831 | up | NM_024162    | Fabp3    | 79131  |
| 3.9672627 | up | NM_053365    | Fabp4    | 79451  |
| 6.4360747 | up | NM_053445    | Fads1    | 84575  |
| 5.515426  | up | NM_173137    | Fads3    | 286922 |
| 3.6017206 | up | NM_080895    | Faim     | 140930 |
| 2.6982455 | up | NM_001014843 | Faim3    | 548326 |
| 6.4951196 | up | XM_001081585 | Falz     | 303617 |
| 2.4914212 | up | NM_001007668 | Fam100a  | 302941 |
| 17.578775 | up | NM_001034958 | Fam104a  | 619573 |
| 2.854832  | up | NM_001025129 | Fam107a  | 361018 |
| 10.383375 | up | NM_001014028 | Fam108b1 | 309399 |
| 3.4703546 | up | XM_001068403 | Fam108c1 | 361601 |
| 2.166377  | up | NM_001024341 | Fam110b  | 500400 |
| 2.866578  | up | XM_001072497 | Fam115a  | 362353 |
| 3.0518217 | up | XM_001057380 | Fam116a  | 306229 |
| 3.445173  | up | XM_001054735 | Fam116b  | 362983 |
| 3.5609355 | up | XM_001069873 | Fam117b  | 363236 |
| 3.4465306 | up | NM_001025283 | Fam118b  | 315549 |
| 2.5549514 | up | XM_001071910 | Fam119a  | 301466 |
| 2.4611452 | up | NM_001014029 | Fam122a  | 309420 |
| 3.1232402 | up | NM_199375    | Fam125a  | 290635 |
| 2.1423385 | up | XM_001061478 | Fam126a  | 499975 |
| 4.41354   | up | NM_001024799 | Fam133b  | 362320 |
| 3.0910583 | up | XM_001057799 | Fam134a  | 363252 |
| 2.990064  | up | XM_001081451 | Fam134c  | 360632 |
| 3.209146  | up | XM_001068890 | Fam135a  | 367235 |
| 2.7142546 | up | XM_001061083 | Fam13b1  | 291694 |
| 5.827776  | up | XM_001066002 | Fam151b  | 499507 |
| 3.321849  | up | NM_001008296 | Fam158a  | 290224 |
| 3.4020135 | up | NM_001029903 | Fam162a  | 360721 |
| 3.9605966 | up | XM_001058011 | Fam164a  | 310244 |
| 4.0219374 | up | XM_001061134 | Fam173a  | 287150 |
| 2.4806228 | up | XM_001066063 | Fam173b  | 499561 |
| 3.0212903 | up | XM_001054804 | Fam175b  | 293570 |
| 4.0056305 | up | XM_001062922 | Fam178a  | 499360 |
| 4.258141  | up | XM_001067322 | Fam179a  | 313892 |
| 2.3556738 | up | XM_001072337 | Fam188a  | 291320 |

|           |    |              |            |        |
|-----------|----|--------------|------------|--------|
| 5.866617  | up | XM_001078764 | Fam189a2   | 309415 |
| 3.2821813 | up | XM_001077686 | Fam18b2    | 687358 |
| 2.2042274 | up | XM_001067482 | Fam18b-ps1 | 309146 |
| 2.8786778 | up | XM_001059938 | Fam193a    | 305452 |
| 6.8503532 | up | XM_001069211 | Fam193b    | 498703 |
| 2.5435598 | up | XM_001081799 | Fam195b    | 360677 |
| 2.58603   | up | XM_001068245 | Fam20b     | 304885 |
| 10.34601  | up | NM_199207    | Fam21c     | 297530 |
| 4.0259914 | up | XM_001059804 | Fam36a     | 289278 |
| 34.859993 | up | NM_001077200 | Fam38a     | 361430 |
| 2.1011982 | up | XM_217218    | Fam46a     | 300870 |
| 4.622716  | up | XM_001073211 | Fam49a     | 298890 |
| 20.458042 | up | XM_001066035 | Fam49b     | 299909 |
| 6.794     | up | XM_001055598 | Fam50a     | 293862 |
| 49.895233 | up | NM_001013935 | Fam54b     | 298549 |
| 2.006169  | up | XM_001060299 | Fam55c     | 681096 |
| 11.492837 | up | NM_001025118 | Fam63a     | 310665 |
| 2.1220276 | up | XM_001054973 | Fam63b     | 363089 |
| 5.977172  | up | XM_001060943 | Fam69a     | 360906 |
| 2.1891758 | up | XM_001066463 | Fam70b     | 290877 |
| 4.254561  | up | XM_001065867 | Fam76a     | 362618 |
| 2.6961532 | up | NM_001037200 | Fam82a1    | 313840 |
| 7.1403117 | up | NM_001014046 | Fam82a2    | 311328 |
| 3.6569412 | up | XM_001053730 | Fam92a1    | 297903 |
| 10.073448 | up | NM_001008327 | Fam96a     | 300797 |
| 6.1034393 | up | NM_001014073 | Fam98a     | 313873 |
| 2.5741117 | up | XM_001064256 | Fancl      | 305600 |
| 3.5766034 | up | XM_001070569 | Farp2      | 316639 |
| 8.463699  | up | NM_001013139 | Fars2      | 306879 |
| 13.418965 | up | NM_001024237 | Farsa      | 288917 |
| 23.925951 | up | NM_001004252 | Farsb      | 301544 |
| 2.0308769 | up | NM_017332    | Fasn       | 50671  |
| 48.619324 | up | NM_001011967 | Fastk      | 296741 |
| 3.277276  | up | XM_001081175 | Fastkd5    | 366192 |
| 7.82764   | up | NM_031819    | Fat1       | 83720  |
| 4.031611  | up | NM_001012739 | Fau        | 29752  |
| 2.3637311 | up | XM_001062865 | Fbln2      | 282583 |
| 6.5073223 | up | NM_019153    | Fbln5      | 29158  |
| 2.790307  | up | NM_031825    | Fbn1       | 83727  |
| 2.1950765 | up | XM_232330    | Fbx114     | 312675 |
| 3.9417975 | up | XM_001071661 | Fbx117     | 316663 |
| 9.655438  | up | XM_001076775 | Fbx13      | 306129 |
| 5.935544  | up | XM_001055670 | Fbx14      | 313101 |
| 9.833868  | up | XM_001060082 | Fbx15      | 305424 |

|           |    |              |          |        |
|-----------|----|--------------|----------|--------|
| 2.1874087 | up | NM_001005563 | Fbx16    | 362941 |
| 2.6282084 | up | XM_001075450 | Fbx18    | 498941 |
| 4.8845983 | up | NM_181631    | Fbxo11   | 301674 |
| 3.9538398 | up | XM_001069012 | Fbxo18   | 291293 |
| 16.078798 | up | NM_001037770 | Fbxo22   | 300724 |
| 2.0036814 | up | NM_001014239 | Fbxo25   | 364637 |
| 2.646492  | up | XM_001063044 | Fbxo28   | 305105 |
| 34.581577 | up | XM_001064070 | Fbxo3    | 690634 |
| 3.9413717 | up | NM_001007690 | Fbxo30   | 308283 |
| 178.3578  | up | NM_001044259 | Fbxo31   | 498959 |
| 36.494404 | up | NM_133521    | Fbxo32   | 171043 |
| 11.665233 | up | XM_001073518 | Fbxo34   | 305830 |
| 9.687648  | up | XM_001059463 | Fbxo38   | 307390 |
| 3.1786835 | up | XM_001054338 | Fbxo4    | 310363 |
| 2.4848971 | up | XM_001074239 | Fbxo44   | 500587 |
| 237.17917 | up | NM_138917    | Fbxo6    | 192351 |
| 4.630184  | up | NM_001012050 | Fbxo8    | 306436 |
| 3.2214491 | up | NM_001011998 | Fbxo9    | 300849 |
| 2.7615933 | up | XM_001063835 | Fbxw11   | 303024 |
| 2.367495  | up | XM_001080206 | Fbxw2    | 311881 |
| 9.700541  | up | XM_001058429 | Fbxw4    | 309444 |
| 25.223045 | up | NM_001025730 | Fbxw5    | 362081 |
| 26.080494 | up | NM_033351    | Fcgrt    | 29558  |
| 3.6409202 | up | NM_031348    | Fcn1     | 83517  |
| 2.8590755 | up | NM_019238    | Fdft1    | 29580  |
| 4.9084163 | up | NM_017126    | Fdx1     | 29189  |
| 5.4089694 | up | XM_001060280 | Fech     | 361338 |
| 41.74082  | up | NM_001025706 | Fem1a    | 316131 |
| 2.9500706 | up | XM_001053664 | Fem1c    | 302288 |
| 71.93983  | up | NM_001011915 | Fermt2   | 289992 |
| 2.9595644 | up | XM_001062414 | Fert2    | 301737 |
| 23.033222 | up | NM_053600    | Fez2     | 94269  |
| 22.498165 | up | NM_053428    | Fgf13    | 84488  |
| 7.1687593 | up | NM_024146    | Fgfr1    | 79114  |
| 2.0227044 | up | XM_001053923 | Fgfr11   | 500109 |
| 2.7269053 | up | NM_201421    | Fgfr1op2 | 362463 |
| 4.4239063 | up | NM_001013932 | Fggy     | 298250 |
| 5.5285306 | up | NM_053455    | Fgl2     | 84586  |
| 11.486305 | up | NM_001033926 | Fhl1     | 25177  |
| 16.663208 | up | XM_001056311 | Fhl3     | 313582 |
| 33.00927  | up | XM_001072430 | Fhod1    | 291964 |
| 2.916318  | up | NM_001025042 | Fibin    | 499856 |
| 5.1761265 | up | NM_001010946 | Ficd     | 288741 |
| 4.040925  | up | NM_001047096 | Fig4     | 309855 |

|           |    |              |         |        |
|-----------|----|--------------|---------|--------|
| 16.173454 | up | NM_145682    | Filip1  | 246776 |
| 12.502936 | up | NM_001008295 | Fip111  | 289582 |
| 29.13519  | up | XM_001076962 | Fis1    | 288584 |
| 51.224037 | up | XM_001055627 | Fitm1   | 290223 |
| 4.1796265 | up | XM_001070393 | Fitm2   | 311617 |
| 6.437015  | up | NM_013102    | Fkbp1a  | 25639  |
| 7.0275216 | up | XM_001080093 | Fkbp3   | 299104 |
| 6.4690633 | up | XM_001066628 | Fkbp4   | 260321 |
| 3.0070422 | up | XM_215758    | Fkbp7   | 295672 |
| 9.791819  | up | NM_001037180 | Fkbp8   | 290652 |
| 8.816365  | up | NM_199390    | Flcn    | 303185 |
| 95.21102  | up | NM_001008279 | Flii    | 287375 |
| 18.451206 | up | XM_001056685 | Flna    | 293860 |
| 4.4760666 | up | XM_001071051 | Flnb    | 306204 |
| 34.618732 | up | XM_001061717 | Flnc    | 362332 |
| 15.538179 | up | NM_022701    | Flot1   | 64665  |
| 2.7589018 | up | NM_031830    | Flot2   | 83764  |
| 2.6957273 | up | XM_001064239 | Flrt2   | 299236 |
| 6.9823003 | up | NM_001037795 | Fmc1    | 500087 |
| 2.0087686 | up | NM_144737    | Fmo2    | 246245 |
| 8.698572  | up | XM_573235    | Fn3k    | 498034 |
| 2.3026402 | up | NM_138914    | Fnbp1   | 192348 |
| 9.786998  | up | XM_001065862 | Fnbp4   | 311183 |
| 2.2540772 | up | NM_001038615 | Fndc1   | 308099 |
| 4.8114104 | up | XM_001070746 | Fndc3a  | 306022 |
| 2.2900367 | up | XM_001057133 | Fndc3b  | 294925 |
| 3.9637423 | up | NM_172034    | Fntb    | 64511  |
| 3.300373  | up | NM_022197    | Fos     | 314322 |
| 2.587575  | up | NM_001013146 | Fosb    | 308411 |
| 5.9149103 | up | NM_012954    | Fosl2   | 25446  |
| 3.112594  | up | XM_001060923 | Foxj2   | 502886 |
| 2.0912926 | up | XM_001074052 | Foxj3   | 313554 |
| 9.351596  | up | XM_001065012 | Foxn3   | 314374 |
| 2.8094797 | up | XM_001056726 | Foxo1   | 84482  |
| 2.0613086 | up | XM_001056575 | Foxp2   | 500037 |
| 11.840496 | up | XM_235988    | Foxred1 | 315547 |
| 2.8467212 | up | XM_001070964 | Frg1    | 689484 |
| 3.4857748 | up | XM_001064153 | Frg1l   | 361156 |
| 2.8957355 | up | XM_001064688 | Frmf6   | 257646 |
| 4.3838553 | up | XM_001073918 | Frrs1   | 310810 |
| 2.0494108 | up | XM_001080960 | Frs2    | 314850 |
| 8.252795  | up | NM_012561    | Fst     | 24373  |
| 57.341846 | up | NM_012848    | Fth1    | 25319  |
| 4.0235276 | up | NM_022500    | Ftl     | 29292  |

|            |    |              |            |        |
|------------|----|--------------|------------|--------|
| 10.070874  | up | NM_001039713 | Fto        | 291905 |
| 3.9536126  | up | XM_001062916 | Ftsj1      | 363450 |
| 2.2155905  | up | NM_001037653 | Fubp1      | 654496 |
| 5.3169756  | up | NM_012562    | Fuca1      | 24375  |
| 19.289387  | up | NM_001004218 | Fuca2      | 292485 |
| 2.7404249  | up | NM_001025027 | Fundc1     | 363442 |
| 12.108043  | up | XM_001059050 | Fundc2     | 361288 |
| 6.7243705  | up | NM_001025738 | Fusip1     | 362630 |
| 14.305525  | up | NM_001002289 | Fut8       | 432392 |
| 2.8853009  | up | NM_053371    | Fxc1       | 84384  |
| 75.83663   | up | NM_001012179 | Fxr1       | 361927 |
| 3.592414   | up | XM_001079469 | Fxr2       | 287433 |
| 99.01101   | up | NM_031648    | Fxyd1      | 58971  |
| 2.4541585  | up | NM_022008    | Fxyd7      | 63848  |
| 4.1360784  | up | XM_001078714 | Fyco1      | 301085 |
| 10.050633  | up | NM_001047899 | Fydd1      | 360726 |
| 9.330592   | up | XM_001074757 | G3bp1      | 171092 |
| 13.5664015 | up | NM_001013989 | G3bp2      | 305240 |
| 80.49585   | up | NM_176077    | G6pc3      | 303565 |
| 10.701765  | up | NM_017006    | G6pd       | 24377  |
| 21.16592   | up | NM_199118    | Gaa        | 367562 |
| 3.4734426  | up | XM_001070145 | Gab1       | 361388 |
| 29.918383  | up | NM_172036    | Gabarap    | 58974  |
| 137.00845  | up | NM_001044294 | Gabarap11  | 689161 |
| 11.359174  | up | NM_022706    | Gabarap12  | 64670  |
| 2.843493   | up | XM_001065754 | Gabpa      | 363735 |
| 3.0321655  | up | XM_001054003 | Gabpb11    | 364738 |
| 5.590116   | up | NM_017292    | Gabrr2     | 29695  |
| 36.265644  | up | NM_024127    | Gadd45a    | 25112  |
| 3.3171532  | up | NM_001008321 | Gadd45b    | 299626 |
| 8.742067   | up | NM_001077640 | Gadd45g    | 291005 |
| 3.3854597  | up | XM_001071308 | Gadd45gip1 | 288916 |
| 6.7124395  | up | NM_001013919 | Galk2      | 296117 |
| 4.3997765  | up | NM_001007704 | Galm       | 313843 |
| 7.8001943  | up | NM_024373    | Galnt1     | 79214  |
| 2.2172322  | up | NM_199393    | Galnt11    | 311952 |
| 4.1622744  | up | XM_001054081 | Galnt2     | 292090 |
| 2.573398   | up | NM_001025053 | Galnt4     | 500826 |
| 2.3352916  | up | NM_031796    | Galnt5     | 83627  |
| 3.8248353  | up | NM_001013089 | Galt       | 298003 |
| 9.37661    | up | XM_001077792 | Ganab      | 293721 |
| 2.4416687  | up | NM_017008    | Gapdh      | 24383  |
| 2.8153155  | up | XM_001070609 | Gapdh-ps2  | 689689 |
| 10.045068  | up | XM_001078902 | Gapvd1     | 311880 |

|           |    |              |         |        |
|-----------|----|--------------|---------|--------|
| 23.238592 | up | XM_001061006 | Gars    | 297113 |
| 97.86661  | up | NM_057100    | Gas6    | 58935  |
| 4.161009  | up | XM_001068512 | Gatad1  | 500005 |
| 4.1156397 | up | NM_001024888 | Gatad2b | 310614 |
| 2.2098882 | up | XM_001077390 | Gatc    | 360821 |
| 2.6168983 | up | NM_001025128 | Gatsl3  | 360969 |
| 8.308957  | up | XM_001071921 | Gba     | 684536 |
| 3.994475  | up | XM_001069986 | Gba2    | 298399 |
| 2.8689656 | up | NM_001017486 | Gbas    | 498174 |
| 3.9917114 | up | XM_001066196 | Gbf1    | 309451 |
| 2.7361007 | up | XM_001078913 | Gbp1    | 304266 |
| 5.5388074 | up | XM_001055585 | Gca     | 295647 |
| 3.968498  | up | XM_001061993 | Gcap14  | 306306 |
| 4.801658  | up | XM_001053446 | Gcc2    | 309798 |
| 26.236864 | up | XM_001066810 | Gcdh    | 364975 |
| 2.0845668 | up | XM_001072034 | Gcn111  | 690632 |
| 2.445114  | up | NM_031749    | Gcs1    | 78947  |
| 5.9799323 | up | NM_133598    | Gcsh    | 171133 |
| 8.037739  | up | NM_031776    | Gda     | 83585  |
| 27.552885 | up | NM_032615    | Gde1    | 60418  |
| 62.949806 | up | NM_017088    | Gdi1    | 25183  |
| 33.209167 | up | NM_017276    | Gdi2    | 29662  |
| 4.152098  | up | NM_001044238 | Gdpd1   | 303407 |
| 2.6171103 | up | NM_053625    | Gfm1    | 114017 |
| 2.3631608 | up | NM_001002819 | Gfpt2   | 360518 |
| 7.841916  | up | NM_001011994 | Gga1    | 300066 |
| 5.0525155 | up | XM_001076216 | Gga2    | 293455 |
| 3.714512  | up | XM_001058292 | Ggct    | 362368 |
| 4.1292477 | up | NM_031756    | Ggcx    | 81716  |
| 13.370792 | up | NM_001004273 | Ggnbp2  | 360584 |
| 75.1472   | up | NM_001005908 | Ghitm   | 290596 |
| 5.2858477 | up | NM_017094    | Ghr     | 25235  |
| 2.4197788 | up | NM_173153    | Gimap4  | 286938 |
| 3.1300523 | up | NM_001024328 | Gimap7  | 500113 |
| 2.8492825 | up | NM_001008398 | Gimap9  | 493865 |
| 2.009646  | up | NM_001030027 | Gins4   | 290842 |
| 11.816988 | up | NM_053341    | Gipc1   | 83823  |
| 3.2868266 | up | NM_031814    | Git1    | 83709  |
| 7.2971296 | up | NM_001085381 | Gja7    | 266706 |
| 5.001955  | up | NM_001012160 | Gkap1   | 361202 |
| 3.0035496 | up | XM_001076727 | Glb1    | 316033 |
| 3.6141427 | up | NM_001025731 | Gle1    | 362098 |
| 11.107749 | up | NM_017211    | Glg1    | 29476  |
| 36.39629  | up | NM_207594    | Glo1    | 294320 |

|           |    |              |         |        |
|-----------|----|--------------|---------|--------|
| 2.6265671 | up | NM_001014227 | Glod4   | 363644 |
| 7.742     | up | NM_001013034 | Glr2    | 114022 |
| 9.972733  | up | NM_032614    | Glr3    | 58815  |
| 6.101844  | up | XM_343103    | Glr5    | 362776 |
| 2.819177  | up | NM_012569    | Gls     | 24398  |
| 2.8064868 | up | XM_001065807 | Glt25d1 | 290637 |
| 2.5543704 | up | NM_001007683 | Glt8d1  | 306253 |
| 2.3103979 | up | XM_001057023 | Glt8d3  | 300173 |
| 9.43094   | up | XM_001080376 | Glt9    | 288707 |
| 32.45731  | up | NM_207591    | Gltscr2 | 292624 |
| 18.115318 | up | NM_012570    | Glud1   | 24399  |
| 263.75012 | up | NM_017073    | Glul    | 24957  |
| 2.6722562 | up | NM_001033931 | Gmcl1   | 312516 |
| 6.9061737 | up | NM_181091    | Gmfg    | 113940 |
| 2.8376682 | up | NM_001025056 | Gmppa   | 501167 |
| 12.333809 | up | NM_001024754 | Gmps    | 295088 |
| 2.0700984 | up | NM_001013119 | Gna13   | 303634 |
| 59.021423 | up | NM_031035    | Gnai2   | 81664  |
| 3.208934  | up | NM_013106    | Gnai3   | 25643  |
| 88.332405 | up | NM_019132    | Gnas    | 24896  |
| 2.576985  | up | NM_030987    | Gnb1    | 24400  |
| 3.4185355 | up | NM_031037    | Gnb2    | 81667  |
| 8.249986  | up | NM_130734    | Gnb2l1  | 83427  |
| 2.229209  | up | NM_001013910 | Gnb4    | 294962 |
| 5.2895913 | up | NM_031770    | Gnb5    | 83579  |
| 2.8486657 | up | NM_053660    | Gng10   | 114119 |
| 2.495447  | up | XM_001067408 | Gng12   | 114120 |
| 15.98726  | up | NM_024377    | Gng5    | 79218  |
| 4.2402096 | up | NM_212500    | Gnl1    | 309593 |
| 6.4562    | up | NM_001025736 | Gnl2    | 362593 |
| 9.718471  | up | NM_175580    | Gnl3    | 290556 |
| 15.605793 | up | NM_053410    | Gnpat   | 84470  |
| 2.1598697 | up | XM_001066558 | Gnpda1  | 683570 |
| 3.4751318 | up | XM_001079967 | Gnptab  | 362865 |
| 7.2186017 | up | NM_001011989 | Gns     | 299825 |
| 133.53139 | up | XM_001061798 | Golga4  | 501069 |
| 4.7598166 | up | NM_001033065 | Golga5  | 299258 |
| 7.5239162 | up | NM_001007731 | Golga7  | 361171 |
| 3.4999108 | up | NM_138885    | Golgb1  | 192243 |
| 4.486544  | up | XM_001062460 | Golim4  | 310526 |
| 6.022777  | up | XM_001059699 | Gopc    | 309774 |
| 2.2348857 | up | NM_019385    | Gorasp1 | 56082  |
| 25.626541 | up | NM_001007720 | Gorasp2 | 113961 |
| 3.61021   | up | NM_053584    | Gosr1   | 94189  |

|           |    |              |         |        |
|-----------|----|--------------|---------|--------|
| 4.2431674 | up | NM_031685    | Gosr2   | 64154  |
| 60.542168 | up | NM_012571    | Got1    | 24401  |
| 3.8371544 | up | NM_013177    | Got2    | 25721  |
| 14.703333 | up | NM_001004240 | Gpaa1   | 300046 |
| 2.4405255 | up | XM_001079698 | Gpatch1 | 292810 |
| 4.8916197 | up | XM_215485    | Gpbp1   | 294734 |
| 3.078027  | up | NM_030828    | Gpc1    | 58920  |
| 2.1462023 | up | NM_012774    | Gpc3    | 25236  |
| 2.0850823 | up | NM_001014108 | Gpc4    | 317322 |
| 4.399436  | up | NM_198779    | Gpcpd1  | 362219 |
| 20.508905 | up | NM_012736    | Gpd2    | 25062  |
| 309.65564 | up | NM_207592    | Gpi     | 292804 |
| 5.308951  | up | XM_001074228 | Gpihbp1 | 300027 |
| 19.537102 | up | XM_001054977 | Gpkow   | 679890 |
| 10.168443 | up | XM_001066907 | Gpn2    | 362614 |
| 7.5530405 | up | NM_201991    | Gpn3    | 360810 |
| 223.99608 | up | NM_133298    | Gpnmb   | 113955 |
| 3.4041314 | up | NM_199399    | Gpr108  | 316136 |
| 4.5692987 | up | NM_139110    | Gpr116  | 245977 |
| 2.7995374 | up | XM_001062029 | Gpr155  | 311730 |
| 9.595371  | up | NM_001085353 | Gpr177  | 362065 |
| 7.868728  | up | NM_001006994 | Gpr180  | 306165 |
| 3.4948757 | up | NM_053302    | Gpr182  | 29307  |
| 4.1069226 | up | NM_080579    | Gpr19   | 312787 |
| 4.2388644 | up | XM_342301    | Gpr89   | 362003 |
| 8.943698  | up | NM_134386    | Gprasp1 | 171407 |
| 16.816343 | up | XM_001081657 | Gprc5c  | 287805 |
| 27.446053 | up | NM_053969    | Gps1    | 117039 |
| 42.629486 | up | NM_001017477 | Gps2    | 497941 |
| 10.878362 | up | NM_031039    | Gpt     | 81670  |
| 2.370516  | up | NM_001012057 | Gpt2    | 307759 |
| 85.90793  | up | NM_030826    | Gpx1    | 24404  |
| 35.01681  | up | NM_022525    | Gpx3    | 64317  |
| 104.84265 | up | NM_017165    | Gpx4    | 29328  |
| 6.166978  | up | NM_001014160 | Gramd1a | 361550 |
| 8.6302805 | up | NM_030846    | Grb2    | 81504  |
| 44.99193  | up | NM_153308    | Grina   | 266668 |
| 7.1769505 | up | NM_053807    | Gripap1 | 116493 |
| 6.031893  | up | NM_017113    | Grn     | 29143  |
| 3.128774  | up | NM_024487    | Grpel1  | 79563  |
| 14.326714 | up | XM_001073361 | Grsf1   | 305256 |
| 2.1307707 | up | NM_001012067 | Grwd1   | 308592 |
| 3.815719  | up | XM_001078877 | Gse1    | 307913 |
| 88.30377  | up | NM_001004080 | Gsn     | 296654 |



|           |    |              |          |        |
|-----------|----|--------------|----------|--------|
| 16.98802  | up | NM_001003978 | Gspt1    | 24420  |
| 3.9590628 | up | NM_012962    | Gss      | 25458  |
| 8.328517  | up | NM_031509    | Gsta3    | 24421  |
| 6.1786766 | up | NM_181371    | Gstk1    | 297029 |
| 40.670425 | up | NM_017014    | Gstm1    | 24423  |
| 44.362144 | up | NM_177426    | Gstm2    | 24424  |
| 24.059175 | up | NM_031154    | Gstm7    | 81869  |
| 24.869823 | up | NM_001007602 | Gsto1    | 114846 |
| 2.0092049 | up | NM_001012071 | Gsto2    | 309465 |
| 2.1589625 | up | NM_012577    | Gstp1    | 24426  |
| 5.3914723 | up | NM_053293    | Gstt1    | 25260  |
| 15.36814  | up | XM_574740    | Gstt3    | 499422 |
| 4.240498  | up | XM_001061506 | Gstz1    | 681913 |
| 3.9601097 | up | NM_022208    | Gtf2a1   | 83830  |
| 9.90446   | up | NM_031041    | Gtf2b    | 81673  |
| 2.777252  | up | XM_001062046 | Gtf2e1   | 303918 |
| 4.517548  | up | XM_224929    | Gtf2e2   | 306516 |
| 2.8169687 | up | NM_001007711 | Gtf2f1   | 316123 |
| 6.427992  | up | NM_031042    | Gtf2f2   | 81674  |
| 4.5448036 | up | NM_001077428 | Gtf2h2   | 294693 |
| 2.1912808 | up | NM_001024236 | Gtf2h3   | 288651 |
| 6.1722755 | up | NM_212501    | Gtf2h4   | 294236 |
| 8.717176  | up | XM_001067341 | Gtf2h5   | 502227 |
| 2.7616744 | up | NM_001001504 | Gtf2ird1 | 246770 |
| 9.00952   | up | XM_001069721 | Gtf3a    | 246299 |
| 2.1269107 | up | NM_133541    | Gtf3c1   | 171063 |
| 2.6725152 | up | XM_001066298 | Gtf3c3   | 316810 |
| 23.88163  | up | XM_001063347 | Gtf3c6   | 361858 |
| 2.9448307 | up | NM_001037978 | Gtl3     | 307642 |
| 6.128704  | up | XM_001075632 | Gtpbp1   | 300077 |
| 5.8255243 | up | NM_053689    | Gtpbp4   | 114300 |
| 12.788372 | up | NM_001013924 | Gtpbp5   | 296462 |
| 4.0361905 | up | XM_001078867 | Gtpbp6   | 363931 |
| 2.7076464 | up | NM_001025015 | Gtpbp8   | 360714 |
| 40.26099  | up | NM_001013115 | Guk1     | 303179 |
| 4.2578135 | up | NM_017015    | Gusb     | 24434  |
| 49.32309  | up | NM_031043    | Gyg1     | 81675  |
| 31.327028 | up | NM_001013233 | Gypc     | 364837 |
| 13.281381 | up | XM_001076928 | Gys1     | 690987 |
| 2.5739365 | up | XM_001057286 | Gzf1     | 311508 |
| 8.548839  | up | XM_001062255 | H13      | 311545 |
| 8.88439   | up | NM_012578    | H1f0     | 24437  |
| 29.579927 | up | NM_017182    | H2afy    | 29384  |
| 5.95661   | up | NM_022674    | H2afz    | 58940  |

|           |    |              |         |        |
|-----------|----|--------------|---------|--------|
| 61.250504 | up | NM_053985    | H3f3b   | 117056 |
| 26.111511 | up | NM_001079940 | Habp4   | 361196 |
| 3.6273675 | up | XM_342160    | Hace1   | 361866 |
| 13.104062 | up | NM_057186    | Hadh    | 113965 |
| 100.09784 | up | NM_130826    | Hadha   | 170670 |
| 140.93251 | up | NM_133618    | Hadhb   | 171155 |
| 6.9287033 | up | NM_033349    | Hagh    | 24439  |
| 7.4635167 | up | NM_001009657 | Hat1    | 296501 |
| 2.9325805 | up | NM_138864    | Haus1   | 192228 |
| 2.1692438 | up | NM_001013995 | Haus4   | 305882 |
| 2.226385  | up | NM_001024971 | Haus8   | 290626 |
| 2.4652565 | up | NM_181627    | Hax1    | 291202 |
| 28.234001 | up | NM_013096    | Hba-a2  | 25632  |
| 100.68018 | up | NM_033234    | Hbb     | 24440  |
| 42.76762  | up | NM_198776    | Hbb-b1  | 361619 |
| 10.444405 | up | NM_012945    | Hbegf   | 25433  |
| 12.295886 | up | NM_001011934 | Hbs11   | 293408 |
| 17.483175 | up | XM_001063786 | Hcca2   | 499288 |
| 9.575412  | up | XM_001065465 | Hccs    | 317444 |
| 2.2139704 | up | XM_001057067 | Hcfc1   | 363519 |
| 31.583406 | up | XM_001055621 | Hcfc1r1 | 287097 |
| 2.3622277 | up | NM_001011898 | Hcls1   | 288077 |
| 3.3668046 | up | XM_001053786 | Hdac10  | 362981 |
| 15.738929 | up | XM_001061582 | Hdac2   | 84577  |
| 2.5039377 | up | NM_053448    | Hdac3   | 84578  |
| 110.71278 | up | XM_001067733 | Hdac4   | 363287 |
| 33.91094  | up | XM_001081495 | Hdac5   | 84580  |
| 2.2258148 | up | XM_001070606 | Hdac8   | 363481 |
| 7.2864146 | up | XM_001061439 | Hddc3   | 308758 |
| 9.655384  | up | NM_053707    | Hdgm    | 114499 |
| 11.366699 | up | NM_001014151 | Hdhd2   | 361351 |
| 79.11012  | up | NM_172039    | Hdlbp   | 64474  |
| 6.4334183 | up | XM_001061994 | Heatr1  | 361262 |
| 3.0596843 | up | XM_001055205 | Heatr2  | 304332 |
| 4.2780614 | up | XM_001067127 | Heatr3  | 361375 |
| 3.9282207 | up | XM_001053592 | Heatr5b | 362683 |
| 2.7488086 | up | NM_001079897 | Heatr6  | 497972 |
| 3.6438732 | up | XM_001071946 | Hebp1   | 362454 |
| 2.039835  | up | XM_001072434 | Hebp2   | 308632 |
| 4.169251  | up | XM_218660    | Heca    | 308624 |
| 80.45994  | up | XM_001078686 | Hectd1  | 362736 |
| 18.548292 | up | XM_001075834 | Herc1   | 315771 |
| 55.22604  | up | XM_001054649 | Herc2   | 308669 |
| 6.234274  | up | NM_001012074 | Herc4   | 309758 |

|            |    |              |           |        |
|------------|----|--------------|-----------|--------|
| 2.7886872  | up | XM_342700    | Herc6     | 362376 |
| 10.902525  | up | NM_024360    | Hes1      | 29577  |
| 4.1525526  | up | NM_001011946 | Hexb      | 294673 |
| 31.65515   | up | NM_001025136 | Hexim1    | 498008 |
| 91.9022    | up | NM_001012080 | Hfe2      | 310681 |
| 7.2547545  | up | NM_019387    | Hgs       | 56084  |
| 27.50308   | up | XM_001078610 | Hhat1     | 301073 |
| 54.007465  | up | NM_022243    | Hibadh    | 63938  |
| 6.2324014  | up | NM_001013112 | Hibch     | 301384 |
| 2.9898436  | up | XM_001062399 | Hif1an    | 309434 |
| 12.721913  | up | NM_080902    | Higd1a    | 140937 |
| 64.17594   | up | XM_001070385 | Higd2a    | 290999 |
| 5.8092694  | up | XM_001073678 | Hint1     | 690660 |
| 10.577319  | up | XM_001070128 | Hint2     | 313491 |
| 2.6560323  | up | XM_001055319 | Hint3     | 246769 |
| 15.018383  | up | XM_001061381 | Hip1      | 192154 |
| 4.609581   | up | XM_001072438 | Hip1r     | 81917  |
| 5.227559   | up | XM_001066649 | Hipk2     | 362342 |
| 5.5237412  | up | NM_031787    | Hipk3     | 83617  |
| 2.0597496  | up | NM_001024776 | Hipk4     | 308449 |
| 7.605125   | up | NM_001025725 | Hirip3    | 361650 |
| 4.9141107  | up | NM_001080783 | Hisppd2a  | 311355 |
| 8.339988   | up | NM_024137    | Hivep2    | 29721  |
| 4.716896   | up | NM_012734    | Hk1       | 25058  |
| 23.779543  | up | NM_012735    | Hk2       | 25059  |
| 4.696543   | up | NM_013168    | Hmbs      | 25709  |
| 4.632376   | up | XM_001073808 | Hmg20a    | 315689 |
| 4.856156   | up | XM_001075699 | Hmg20b    | 362825 |
| 6.792794   | up | NM_024386    | Hmgcl     | 79238  |
| 2.6961265  | up | NM_001025624 | Hmgn2     | 114637 |
| 11.8015585 | up | NM_001007020 | Hmgn3     | 113990 |
| 2.0957363  | up | NM_012580    | Hmox1     | 24451  |
| 17.273066  | up | NM_024387    | Hmox2     | 79239  |
| 2.607902   | up | NM_001005876 | Hn1       | 287828 |
| 2.1416688  | up | NM_001013182 | Hn11      | 360492 |
| 12.392668  | up | XM_001055961 | Hnrnpa2b1 | 362361 |
| 2.3859334  | up | NM_031330    | Hnrnpab   | 83498  |
| 7.5017366  | up | NM_001025633 | Hnrnpc    | 290046 |
| 6.060171   | up | NM_001037285 | Hnrnpf    | 64200  |
| 10.993094  | up | NM_001014019 | Hnrnp2    | 308650 |
| 8.838892   | up | XM_001074684 | Hnrnp3    | 361838 |
| 6.987735   | up | NM_057141    | Hnrnpk    | 117282 |
| 30.25975   | up | XM_001068144 | Hnrnpl    | 80846  |
| 2.3430486  | up | XM_001076759 | Hnrnpll2  | 311776 |

|            |    |              |          |        |
|------------|----|--------------|----------|--------|
| 11.09117   | up | NM_175603    | Hnrnpr   | 319110 |
| 4.592057   | up | NM_057139    | Hnrnpu   | 117280 |
| 3.1420667  | up | XM_001070479 | Hnrnpul1 | 361522 |
| 32.046474  | up | NM_001082539 | Hnrpd    | 79256  |
| 18.44431   | up | NM_001033696 | Hnrpdl   | 305178 |
| 58.30203   | up | NM_080896    | Hnrph1   | 140931 |
| 8.319705   | up | XM_001063027 | Hnrpll   | 313842 |
| 7.5706534  | up | NM_053876    | Hnrpm    | 116655 |
| 9.229147   | up | NM_031707    | Homer1   | 29546  |
| 2.8338218  | up | NM_053310    | Homer3   | 29548  |
| 3.6722982  | up | XM_224952    | Hook3    | 306548 |
| 2.2114122  | up | XM_001059031 | Hoxa5    | 79241  |
| 3.393353   | up | XM_001056901 | Hoxa9    | 500126 |
| 2.7488277  | up | XM_001063804 | Hoxd10   | 303991 |
| 4.046643   | up | NM_012582    | Hp       | 24464  |
| 4.0609202  | up | NM_199108    | Hp1bp3   | 313647 |
| 2.5517006  | up | NM_017356    | Hpcal1   | 50871  |
| 26.67938   | up | NM_012583    | Hprt1    | 24465  |
| 2.7425978  | up | XM_001078272 | Hps4     | 304555 |
| 54.31829   | up | XM_001061671 | Hras     | 293621 |
| 2.216734   | up | XM_001053962 | Hrasls   | 288025 |
| 38.986057  | up | NM_181369    | Hrc      | 292905 |
| 2.3531003  | up | NM_031714    | Hrsp12   | 65151  |
| 38.909668  | up | NM_173119    | Hsbp1    | 286899 |
| 2.34647    | up | NM_017081    | Hsd11b2  | 25117  |
| 92.6102    | up | NM_031682    | Hsd17b10 | 63864  |
| 14.2525625 | up | NM_001004209 | Hsd17b11 | 289456 |
| 2.5204163  | up | NM_032066    | Hsd17b12 | 84013  |
| 2.3043456  | up | NM_024392    | Hsd17b4  | 79244  |
| 3.5904598  | up | NM_017235    | Hsd17b7  | 29540  |
| 4.442333   | up | NM_212529    | Hsd17b8  | 361802 |
| 2.2706358  | up | NM_001024896 | Hsd11    | 361418 |
| 25.933773  | up | NM_001025697 | Hsd12    | 313200 |
| 13.252213  | up | XM_001061027 | Hsf1     | 79245  |
| 2.9618044  | up | NM_031694    | Hsf2     | 64441  |
| 9.493953   | up | XM_001075468 | Hsf4     | 291960 |
| 7.626899   | up | NM_175761    | Hsp90aa1 | 299331 |
| 25.51519   | up | NM_001004082 | Hsp90ab1 | 301252 |
| 75.59389   | up | NM_001012197 | Hsp90b1  | 362862 |
| 5.18695    | up | NM_019271    | Hspa13   | 29734  |
| 2.3031456  | up | NM_001004257 | Hspa14   | 307133 |
| 2.133624   | up | NM_212504    | Hspa1b   | 294254 |
| 22.06096   | up | NM_212546    | Hspa11   | 24963  |
| 18.416653  | up | NM_153629    | Hspa4    | 266759 |

|           |    |              |          |        |
|-----------|----|--------------|----------|--------|
| 76.377686 | up | NM_013083    | Hspa5    | 25617  |
| 6.201036  | up | NM_024351    | Hspa8    | 24468  |
| 24.516865 | up | XM_001062585 | Hspa9    | 291671 |
| 169.96977 | up | NM_031970    | Hspb1    | 24471  |
| 5.4541388 | up | NM_130431    | Hspb2    | 161476 |
| 7.701902  | up | NM_031750    | Hspb3    | 78951  |
| 506.24106 | up | NM_138887    | Hspb6    | 192245 |
| 15.663043 | up | XM_001072790 | Hspb7    | 50565  |
| 229.64351 | up | NM_053612    | Hspb8    | 113906 |
| 2.9294274 | up | NM_134419    | Hspbap1  | 171460 |
| 2.0335698 | up | XM_341259    | Hspc159  | 360983 |
| 15.063482 | up | NM_022229    | Hspd1    | 63868  |
| 24.563017 | up | NM_012966    | Hspe1    | 25462  |
| 72.57901  | up | NM_001011901 | Hsph1    | 288444 |
| 19.592255 | up | XM_001080298 | Htatip2  | 292935 |
| 7.538555  | up | XM_001058638 | Htatsf1  | 317612 |
| 19.919199 | up | NM_031721    | Htra1    | 65164  |
| 2.0519898 | up | XM_001058820 | Htt      | 29424  |
| 9.749488  | up | NM_172040    | Hyal2    | 64468  |
| 6.6088843 | up | NM_001034028 | Hyou1    | 192235 |
| 2.2168057 | up | XM_230510    | Hypk     | 311359 |
| 3.0513113 | up | XM_001071149 | Iah1     | 298917 |
| 15.754178 | up | XM_001065536 | Iars2    | 364070 |
| 6.1729817 | up | XM_001062352 | Ibtk     | 315858 |
| 3.408689  | up | NM_138886    | Ick      | 84411  |
| 4.192606  | up | XM_001079346 | Icoslg   | 499415 |
| 32.748947 | up | XM_001081688 | Ict1     | 303673 |
| 3.0695724 | up | NM_013060    | Id2      | 25587  |
| 10.012742 | up | NM_013159    | Ide      | 25700  |
| 11.224986 | up | NM_031510    | Idh1     | 24479  |
| 15.977509 | up | NM_001014161 | Idh2     | 361596 |
| 25.327963 | up | NM_053638    | Idh3a    | 114096 |
| 92.414505 | up | NM_053581    | Idh3B    | 94173  |
| 10.547809 | up | NM_031551    | Idh3g    | 25179  |
| 2.7677667 | up | NM_053539    | Idi1     | 89784  |
| 5.747473  | up | NM_212505    | Ier3     | 294235 |
| 4.8832765 | up | NM_203410    | Ifi27    | 170512 |
| 49.153385 | up | NM_206846    | Ifi27l2b | 299269 |
| 4.676815  | up | NM_001009625 | Ifi35    | 287719 |
| 3.5829523 | up | XM_001079908 | Ifi44    | 310969 |
| 4.644787  | up | NM_172019    | Ifi47    | 246208 |
| 3.0466616 | up | NM_001007694 | Ifit3    | 309526 |
| 7.135775  | up | XM_001059109 | Ifitm1   | 293618 |
| 40.57527  | up | XM_001059289 | Ifitm3   | 361673 |

|            |    |              |         |        |
|------------|----|--------------|---------|--------|
| 3.4751306  | up | XM_001073651 | Ifnar1  | 288264 |
| 10.560866  | up | NM_053783    | Ifngr1  | 116465 |
| 2.472905   | up | XM_001073758 | Ifngr2  | 360697 |
| 8.08774    | up | NM_019242    | Ifrd1   | 29596  |
| 77.71943   | up | NM_001047871 | Ifrd2   | 300994 |
| 9.827916   | up | XM_001080863 | Ift20   | 287541 |
| 5.6038995  | up | XM_001058583 | Ift57   | 303968 |
| 2.65034    | up | NM_001007001 | Ift74   | 313365 |
| 11.806455  | up | NM_031624    | Igbp1   | 58845  |
| 5.3348975  | up | NM_001082478 | Igf1    | 24482  |
| 3.0602314  | up | NM_052807    | Igf1r   | 25718  |
| 2.5986087  | up | NM_031511    | Igf2    | 24483  |
| 7.922814   | up | NM_012756    | Igf2r   | 25151  |
| 2.874102   | up | NM_012817    | Igfbp5  | 25285  |
| 5.064488   | up | NM_013104    | Igfbp6  | 25641  |
| 49.212345  | up | NM_001013048 | Igfbp7  | 289560 |
| 102.138954 | up | XM_001063557 | Igfn1   | 304823 |
| 3.1458046  | up | NM_031586    | Ighmbp2 | 29532  |
| 3.7389784  | up | NM_080899    | Ikkap   | 140934 |
| 3.0613968  | up | XM_001053740 | Ikzf5   | 309031 |
| 3.692684   | up | XM_221655    | Il10rb  | 304091 |
| 6.241259   | up | NM_139116    | Il11ra1 | 245983 |
| 3.910087   | up | NM_013129    | Il15    | 25670  |
| 6.0430737  | up | NM_080889    | Il2rg   | 140924 |
| 2.6038258  | up | NM_001025766 | Il34    | 498951 |
| 5.78755    | up | NM_001047886 | Ilf2    | 310612 |
| 29.384583  | up | NM_133409    | Ilk     | 170922 |
| 2.2158065  | up | XM_001074573 | Ilvbl   | 362843 |
| 17.554836  | up | NM_001034928 | Immt    | 312444 |
| 5.6903477  | up | XM_001074037 | Imp3    | 315697 |
| 22.57194   | up | NM_001009700 | Imp4    | 316317 |
| 11.43417   | up | NM_032057    | Impa1   | 83523  |
| 7.947888   | up | NM_001012235 | Impact  | 497198 |
| 4.9161687  | up | NM_001038591 | Ing1    | 306626 |
| 7.438031   | up | XM_001059606 | Ing2    | 290744 |
| 8.956083   | up | NM_001034107 | Ing3    | 312154 |
| 16.073788  | up | NM_001079887 | Ing4    | 297597 |
| 4.175465   | up | NM_001048233 | Ino80b  | 500225 |
| 11.790158  | up | NM_001017446 | Ino80c  | 291737 |
| 2.447123   | up | NM_001012131 | Inpp1   | 316376 |
| 3.5269296  | up | NM_031002    | Inpp4a  | 80849  |
| 37.489285  | up | XM_001058238 | Inpp5a  | 365382 |
| 4.0770183  | up | NM_001013859 | Inpp5k  | 287533 |
| 6.0602593  | up | NM_022392    | Insig1  | 64194  |

|           |    |              |          |        |
|-----------|----|--------------|----------|--------|
| 8.768517  | up | NM_178091    | Insig2   | 288985 |
| 5.3514433 | up | XM_001070525 | Ints10   | 290679 |
| 2.3950891 | up | NM_001007640 | Ints12   | 295448 |
| 6.6518126 | up | XM_001075102 | Ints3    | 361988 |
| 6.682478  | up | XM_218937    | Ints4    | 308837 |
| 3.9775577 | up | XM_001073616 | Ints5    | 309200 |
| 12.157764 | up | XM_001066109 | Ints9    | 290322 |
| 5.636152  | up | XM_001075731 | Ip6k2    | 59268  |
| 7.6077394 | up | NM_134417    | Ipmk     | 171458 |
| 72.68903  | up | NM_053778    | Ipo13    | 116458 |
| 9.446173  | up | XM_001056047 | Ipo4     | 290228 |
| 9.713686  | up | XM_001075101 | Ipo5     | 306182 |
| 7.762934  | up | XM_001077641 | Ipo7     | 308939 |
| 2.6688166 | up | NM_001008556 | Ippk     | 306808 |
| 2.6067665 | up | XM_001062923 | Iqcb1    | 303915 |
| 2.7176092 | up | XM_001066654 | Iqgap1   | 361598 |
| 15.522755 | up | XM_001057078 | Irak1    | 363520 |
| 2.5393538 | up | XM_001061980 | Irak1bp1 | 300862 |
| 2.7625399 | up | NM_001025422 | Irak2    | 362418 |
| 2.4521494 | up | XM_001079164 | Irak3    | 314870 |
| 2.5168576 | up | NM_022863    | Ireb2    | 64831  |
| 2.8480895 | up | NM_012591    | Irf1     | 24508  |
| 2.0081673 | up | NM_001047086 | Irf2     | 290749 |
| 20.049347 | up | NM_001033691 | Irf7     | 293624 |
| 4.1804857 | up | NM_001012007 | Irgm     | 303090 |
| 56.763847 | up | XM_001078081 | Iscu     | 288740 |
| 7.9571004 | up | XM_001077878 | Isg15    | 298693 |
| 2.9832044 | up | NM_001007741 | Isg2012  | 361977 |
| 6.7781425 | up | NM_001008367 | Isoc2b   | 361501 |
| 2.9587576 | up | NM_001008386 | Ispd     | 493574 |
| 7.8244195 | up | NM_001005887 | Itch     | 311567 |
| 17.574871 | up | NM_133557    | Itfg1    | 171083 |
| 2.1153855 | up | XM_001066574 | Itfg2    | 362441 |
| 5.0572653 | up | NM_001009701 | Itfg3    | 360502 |
| 2.9815395 | up | NM_030994    | Itga1    | 25118  |
| 3.1113112 | up | XM_001067316 | Itga4    | 311144 |
| 2.151934  | up | XM_001068715 | Itgav    | 296456 |
| 30.791431 | up | XM_001070826 | Itgb1bp1 | 298914 |
| 4.9520025 | up | XM_001069915 | Itgb1bp2 | 317258 |
| 15.639413 | up | NM_001004263 | Itgb6    | 311061 |
| 6.5144753 | up | NM_001025712 | Itm2a    | 317218 |
| 138.97632 | up | NM_001006963 | Itm2b    | 290364 |
| 2.061451  | up | NM_001009674 | Itm2c    | 301575 |
| 14.814597 | up | XM_001081181 | Itpa     | 311422 |

|            |    |              |          |        |
|------------|----|--------------|----------|--------|
| 5.8935013  | up | NM_001007235 | Itpr1    | 25262  |
| 2.1398249  | up | XM_001069789 | Itsn1    | 29491  |
| 76.01938   | up | NM_012592    | Ivd      | 24513  |
| 15.753736  | up | NM_001047085 | Ivns1abp | 289089 |
| 27.533915  | up | NM_001044272 | Jagn1    | 502872 |
| 16.370481  | up | XM_001061647 | Jak1     | 84598  |
| 5.164202   | up | NM_031514    | Jak2     | 24514  |
| 5.548139   | up | NM_001034004 | Jam2     | 619374 |
| 45.735092  | up | XM_001077497 | Jkamp    | 299127 |
| 8.796921   | up | XM_001080424 | Jmjd1c   | 171120 |
| 9.480103   | up | NM_001012143 | Jmjd6    | 360665 |
| 10.686122  | up | XM_001080592 | Josd2    | 292876 |
| 21.150877  | up | XM_001059299 | Jph1     | 297748 |
| 2.0218694  | up | XM_001073711 | Jrkl     | 315417 |
| 15.988898  | up | XM_001059651 | Jsrp1    | 690423 |
| 14.488845  | up | NM_019213    | Jtb      | 29439  |
| 30.529383  | up | NM_021835    | Jun      | 24516  |
| 15.281739  | up | NM_031047    | Jup      | 81679  |
| 5.7519083  | up | XM_001055725 | Kank1    | 309429 |
| 28.092123  | up | NM_001006967 | Kars     | 292028 |
| 6.072739   | up | XM_001081432 | Kat2a    | 303539 |
| 7.9643044  | up | NM_001024746 | Katnb1   | 291852 |
| 265.92163  | up | NM_057191    | Kbtbd10  | 117537 |
| 7.07583    | up | XM_001061645 | Kbtbd2   | 312372 |
| 4.6794343  | up | XM_001077889 | Kbtbd4   | 311185 |
| 105.609634 | up | XM_001078108 | Kbtbd5   | 316088 |
| 3.7118073  | up | NM_013186    | Kcnb1    | 25736  |
| 2.3693786  | up | XM_001070801 | Kcnc4    | 684516 |
| 4.8546696  | up | NM_031358    | Kcnj11   | 83535  |
| 15.840952  | up | NM_053981    | Kcnj12   | 117052 |
| 7.8273373  | up | NM_031828    | Kcnma1   | 83731  |
| 20.374784  | up | NM_019315    | Kcnn3    | 54263  |
| 6.971181   | up | XM_001069745 | Kcnq5l   | 259273 |
| 5.573368   | up | XM_001062473 | Kctd18   | 301436 |
| 5.9504805  | up | XM_001081684 | Kctd2    | 498024 |
| 2.0343952  | up | XM_001078592 | Kctd20   | 294307 |
| 4.631237   | up | XM_001070711 | Kctd6    | 305792 |
| 4.8687735  | up | XM_001068535 | Kctd9    | 364410 |
| 3.0417151  | up | XM_001060354 | Kdelc1   | 316370 |
| 14.302342  | up | NM_001017385 | Kdelr1   | 361577 |
| 15.876909  | up | NM_001013122 | Kdelr2   | 304290 |
| 5.039495   | up | XM_001069483 | Kdm1     | 500569 |
| 3.4468029  | up | XM_001075313 | Kdm2b    | 304495 |
| 5.284765   | up | NM_175764    | Kdm3a    | 312440 |



|            |    |              |          |        |
|------------|----|--------------|----------|--------|
| 5.1450152  | up | XM_001067369 | Kdm4c    | 298144 |
| 3.8749747  | up | XM_001062221 | Kdm5b    | 304809 |
| 4.775218   | up | XM_001079385 | Kdm6b    | 363630 |
| 2.2888114  | up | XM_001064145 | Kdsr     | 360833 |
| 3.108126   | up | NM_001037220 | Kiaa0415 | 641386 |
| 5.38381    | up | XM_001053202 | Kif16b   | 311478 |
| 15.666155  | up | NM_057200    | Kif1b    | 117548 |
| 4.5465493  | up | XM_001056804 | Kif21a   | 300158 |
| 2.821402   | up | XM_001057533 | Kif2a    | 84391  |
| 2.531004   | up | XM_001061322 | Kif3b    | 296284 |
| 5.6690784  | up | NM_053486    | Kif3c    | 85248  |
| 12.808537  | up | NM_057202    | Kif5b    | 117550 |
| 2.05927    | up | XM_001065361 | Kif7     | 293047 |
| 2.7604325  | up | XM_001061174 | Kifc3    | 307644 |
| 3.7629306  | up | NM_001081972 | Klc1     | 171041 |
| 3.219097   | up | NM_138520    | Klc3     | 171549 |
| 2.1534317  | up | NM_001009601 | Klc4     | 316226 |
| 6.2783685  | up | NM_053536    | Klf15    | 85497  |
| 8.820414   | up | XM_223423    | Klf3     | 114845 |
| 8.006994   | up | NM_031642    | Klf6     | 58954  |
| 12.5123415 | up | NM_057211    | Klf9     | 117560 |
| 4.812831   | up | XM_001080363 | Klhdc1   | 314190 |
| 3.3538742  | up | NM_001017456 | Klhdc10  | 312199 |
| 23.960344  | up | NM_001034133 | Klhdc2   | 299113 |
| 12.682559  | up | NM_001012203 | Klhdc3   | 363192 |
| 4.1973047  | up | NM_001007685 | Klhdc8b  | 306589 |
| 5.560457   | up | XM_001061200 | Klhl13   | 313445 |
| 7.5697427  | up | XM_214331    | Klhl2    | 290692 |
| 3.8905427  | up | XM_001063385 | Klhl22   | 303792 |
| 28.067398  | up | XM_001067145 | Klhl30   | 316624 |
| 5.0328417  | up | XM_001058807 | Klhl31   | 315833 |
| 2.5846765  | up | NM_001025008 | Klhl38   | 314996 |
| 2.3499844  | up | NM_001047093 | Klhl5    | 305351 |
| 17.636658  | up | NM_001012187 | Klhl7    | 362303 |
| 4.5273027  | up | XM_001065538 | Klhl8    | 289457 |
| 7.477376   | up | XM_001054585 | Klhl9    | 313348 |
| 33.540714  | up | NM_001014792 | Kpna3    | 361055 |
| 4.737711   | up | NM_001015029 | Kpna6    | 362607 |
| 12.731311  | up | NM_017063    | Kpnb1    | 24917  |
| 3.9465063  | up | XM_001074187 | Kptn     | 308107 |
| 14.69965   | up | NM_001009413 | Krcc1    | 312437 |
| 8.791628   | up | XM_001064073 | Krit1    | 362317 |
| 23.777357  | up | XM_001072393 | Krtcap2  | 295243 |
| 11.646726  | up | XM_001080891 | Ksr1     | 360573 |

|            |    |              |          |        |
|------------|----|--------------|----------|--------|
| 2.728981   | up | XM_001069417 | Ktelc1   | 288091 |
| 6.415448   | up | NM_001044288 | Kti12    | 685656 |
| 7.839483   | up | XM_341305    | Ktn1     | 361029 |
| 2.3417687  | up | XM_001071908 | Ky       | 315962 |
| 3.6065366  | up | XM_001080412 | L2hgdh   | 314196 |
| 2.447569   | up | XM_001062517 | L3mbtl3  | 309550 |
| 3.3999014  | up | XM_001056675 | Lactb    | 300803 |
| 15.709045  | up | NM_001024247 | Lactb2   | 297768 |
| 5.893521   | up | XM_001056585 | Lage3    | 293863 |
| 4.9660983  | up | XM_001061207 | Lama4    | 309816 |
| 2.6918347  | up | XM_001060527 | Lama5    | 140433 |
| 5.6452518  | up | XM_001075963 | Lamb1    | 298941 |
| 5.6099634  | up | NM_012974    | Lamb2    | 25473  |
| 7.104297   | up | XM_001071300 | Lamc1    | 117036 |
| 107.858246 | up | NM_012857    | Lamp1    | 25328  |
| 4.558096   | up | NM_053723    | Lancl1   | 114515 |
| 10.297257  | up | NM_001011910 | Lap3     | 289668 |
| 114.417114 | up | NM_199384    | Laptm4a  | 298875 |
| 4.3557467  | up | NM_053538    | Laptm5   | 89783  |
| 2.3577387  | up | XM_001060350 | Large    | 361368 |
| 18.401789  | up | NM_001014036 | Larp1b   | 310348 |
| 3.7906024  | up | XM_001065835 | Larp5    | 307070 |
| 3.4603555  | up | NM_001044290 | Larp7    | 686883 |
| 7.133808   | up | NM_001033700 | Lass2    | 310667 |
| 6.5928397  | up | XM_001063108 | Lass5    | 366984 |
| 4.891243   | up | NM_134453    | Lbr      | 89789  |
| 2.4828644  | up | NM_001047108 | Lbx1     | 499362 |
| 4.2082953  | up | XM_001060474 | Lclat1   | 362702 |
| 2.7866611  | up | NM_199405    | Lcmt1    | 361643 |
| 2.2174733  | up | NM_001011956 | Lcmt2    | 296098 |
| 6.081969   | up | XM_001058773 | Ldb1     | 309447 |
| 2.0469     | up | XM_001059368 | Ldb2     | 289664 |
| 47.76684   | up | XM_001059372 | Ldb3     | 498587 |
| 118.178894 | up | NM_017025    | Ldha     | 24533  |
| 21.94084   | up | NM_012595    | Ldhb     | 24534  |
| 2.1342864  | up | XM_575931    | Ldlrap1  | 500564 |
| 2.5947826  | up | XM_001055542 | Lemd3    | 680066 |
| 4.564215   | up | XM_001056203 | Leng4    | 308309 |
| 2.338344   | up | XM_001058154 | Leng8    | 361506 |
| 12.120675  | up | NM_001005548 | Leol     | 300837 |
| 2.0712345  | up | XM_001062610 | Leprel2  | 297595 |
| 28.540506  | up | NM_020099    | Leprot   | 56766  |
| 14.388309  | up | NM_001013188 | Leprotl1 | 361160 |
| 5.3000216  | up | NM_001005884 | Letm1    | 305457 |

|            |    |              |           |        |
|------------|----|--------------|-----------|--------|
| 2.364453   | up | XM_001061371 | Letmd1    | 681352 |
| 113.18862  | up | NM_019904    | Lgals1    | 56646  |
| 9.241762   | up | NM_031832    | Lgals3    | 83781  |
| 2.8459177  | up | NM_139096    | Lgals3bp  | 245955 |
| 8.749401   | up | NM_053862    | Lgals8    | 116641 |
| 4.189323   | up | NM_012977    | Lgals9    | 25476  |
| 27.266754  | up | NM_022226    | Lgmn      | 63865  |
| 13.586442  | up | NM_001017489 | Lgtn      | 498225 |
| 2.0822794  | up | XM_001076874 | Lgtnl1    | 308432 |
| 20.984581  | up | NM_001012037 | Lias      | 305348 |
| 2.1361122  | up | NM_001012011 | Lig3      | 303369 |
| 8.206424   | up | XM_001077838 | Limch1    | 305332 |
| 2.477243   | up | XM_001076215 | Lin37     | 292787 |
| 2.1408243  | up | XM_001059713 | Lins1     | 308704 |
| 2.5050826  | up | NM_012732    | Lipa      | 25055  |
| 2.425815   | up | XM_001057736 | Lipt1     | 316342 |
| 3.0747674  | up | XM_001066655 | Lipt2     | 365314 |
| 10.40081   | up | XM_001078236 | Litaf     | 65161  |
| 6.3757033  | up | NM_053886    | Lman1     | 116666 |
| 28.771368  | up | NM_139189    | Lmbrd1    | 246046 |
| 3.004168   | up | NM_001008562 | Lmcd1     | 494021 |
| 18.700571  | up | NM_001002016 | Lmna      | 60374  |
| 4.936631   | up | NM_001037358 | Lmo2      | 362176 |
| 24.819864  | up | NM_001001515 | Lmo7      | 361084 |
| 107.15271  | up | XM_001060472 | Lmod2     | 296935 |
| 16.004538  | up | XM_575617    | Lmod3     | 500267 |
| 7.0239663  | up | NM_001013853 | LOC287167 | 287167 |
| 25.82859   | up | NM_198728    | LOC288913 | 288913 |
| 15.144119  | up | XM_001066750 | LOC289378 | 289378 |
| 3.4267685  | up | XM_001054611 | LOC292662 | 292662 |
| 23.330605  | up | NM_001013897 | LOC293103 | 293103 |
| 7.3438754  | up | XM_001056818 | LOC293589 | 293589 |
| 7.3796167  | up | NM_001039607 | LOC294154 | 294154 |
| 5.2961693  | up | XM_001067587 | LOC295398 | 295398 |
| 14.424301  | up | XM_001059497 | LOC296165 | 296165 |
| 2.9490364  | up | XM_001063958 | LOC297828 | 297828 |
| 11.1556635 | up | NM_001013930 | LOC298139 | 298139 |
| 4.1833787  | up | XM_001060121 | LOC301124 | 301124 |
| 7.851447   | up | NM_001044236 | LOC301128 | 301128 |
| 4.8965406  | up | XM_001070285 | LOC302495 | 302495 |
| 2.6205795  | up | NM_001037187 | LOC302680 | 302680 |
| 9.031594   | up | NM_001013979 | LOC304131 | 304131 |
| 5.161665   | up | NM_001013986 | LOC305076 | 305076 |
| 6.5653214  | up | NM_001014007 | LOC306766 | 306766 |

|           |    |              |           |        |
|-----------|----|--------------|-----------|--------|
| 3.9623106 | up | XM_226278    | LOC307671 | 307671 |
| 40.070553 | up | XM_001068023 | LOC307752 | 307752 |
| 5.3186965 | up | XM_001063457 | LOC310177 | 310177 |
| 6.6338525 | up | NM_001009694 | LOC314140 | 314140 |
| 14.646366 | up | NM_001007722 | LOC360504 | 360504 |
| 8.863381  | up | XM_001080824 | LOC360570 | 360570 |
| 2.8562732 | up | XM_001067768 | LOC361100 | 361100 |
| 4.8269696 | up | NM_001047104 | LOC361128 | 361128 |
| 5.025674  | up | NM_001017463 | LOC361635 | 361635 |
| 43.574585 | up | NM_001014174 | LOC361985 | 361985 |
| 6.4853015 | up | NM_001014175 | LOC361990 | 361990 |
| 4.9872828 | up | NM_001025021 | LOC362526 | 362526 |
| 2.735955  | up | NM_207614    | LOC362855 | 362855 |
| 3.7263243 | up | XM_001061775 | LOC363188 | 363188 |
| 2.0564613 | up | XM_001056019 | LOC363418 | 363418 |
| 2.548817  | up | XM_001068543 | LOC363529 | 363529 |
| 7.417733  | up | XM_001065988 | LOC363903 | 363903 |
| 2.6437993 | up | XM_001061044 | LOC364091 | 364091 |
| 8.932496  | up | XM_001067967 | LOC364984 | 364984 |
| 2.082305  | up | XM_001061885 | LOC365050 | 365050 |
| 16.904621 | up | XM_001079986 | LOC365370 | 365370 |
| 2.0133204 | up | XM_001069260 | LOC365824 | 365824 |
| 2.4317193 | up | XM_001058386 | LOC366068 | 366068 |
| 5.10566   | up | NM_001014260 | LOC366431 | 366431 |
| 3.736352  | up | XM_345689    | LOC366669 | 366669 |
| 3.6925654 | up | XM_001054587 | LOC366864 | 366864 |
| 2.381293  | up | XM_001066861 | LOC497729 | 497729 |
| 2.4211836 | up | NM_001017474 | LOC497934 | 497934 |
| 2.2386465 | up | XM_001061569 | LOC498122 | 498122 |
| 2.3298764 | up | XM_001069849 | LOC498249 | 498249 |
| 42.425896 | up | XM_001063181 | LOC498369 | 498369 |
| 6.763234  | up | XM_001059576 | LOC498453 | 498453 |
| 5.9006777 | up | XM_001075110 | LOC498555 | 498555 |
| 7.320557  | up | XM_001064371 | LOC498685 | 498685 |
| 16.180319 | up | NM_001017510 | LOC498750 | 498750 |
| 3.736441  | up | XM_001054141 | LOC498752 | 498752 |
| 2.359056  | up | XM_001078842 | LOC499124 | 499124 |
| 63.27731  | up | XM_001076383 | LOC499235 | 499235 |
| 4.5394635 | up | NM_001025036 | LOC499339 | 499339 |
| 2.3732598 | up | NM_001025039 | LOC499602 | 499602 |
| 8.289109  | up | XM_001075928 | LOC499706 | 499706 |
| 3.398907  | up | XM_001078222 | LOC499718 | 499718 |
| 4.027454  | up | NM_001047110 | LOC499770 | 499770 |
| 6.0882297 | up | XM_001078515 | LOC499782 | 499782 |

|           |    |              |           |        |
|-----------|----|--------------|-----------|--------|
| 2.389135  | up | XM_001057511 | LOC500034 | 500034 |
| 2.085145  | up | XM_001061323 | LOC500046 | 500046 |
| 2.6221893 | up | XM_001068033 | LOC500195 | 500195 |
| 9.214297  | up | NM_001024334 | LOC500300 | 500300 |
| 3.7554445 | up | XM_001068792 | LOC500378 | 500378 |
| 8.741015  | up | XM_001068868 | LOC500522 | 500522 |
| 5.9316435 | up | XM_001067281 | LOC500654 | 500654 |
| 2.1214905 | up | XM_001071951 | LOC500881 | 500881 |
| 6.822727  | up | NM_001025054 | LOC500956 | 500956 |
| 22.007404 | up | NM_001033072 | LOC500959 | 500959 |
| 2.7673066 | up | XM_576513    | LOC501098 | 501098 |
| 5.983327  | up | NM_001024361 | LOC501110 | 501110 |
| 10.819745 | up | XM_001055782 | LOC501441 | 501441 |
| 11.347064 | up | XM_577408    | LOC501979 | 501979 |
| 2.3562593 | up | XM_001069156 | LOC502145 | 502145 |
| 5.99631   | up | XM_001054404 | LOC502627 | 502627 |
| 2.0263197 | up | XM_001075598 | LOC502859 | 502859 |
| 16.142515 | up | NM_001044273 | LOC503165 | 503165 |
| 2.6391232 | up | XM_001077756 | LOC503192 | 503192 |
| 3.5784314 | up | XM_001069951 | LOC503338 | 503338 |
| 32.77042  | up | NM_001031627 | LOC606294 | 606294 |
| 4.241918  | up | NM_001034959 | LOC619574 | 619574 |
| 18.434431 | up | NM_022271    | LOC64038  | 64038  |
| 18.952204 | up | NM_001037369 | LOC641520 | 641520 |
| 12.342932 | up | NM_001037658 | LOC652955 | 652955 |
| 2.4835277 | up | NM_001037659 | LOC652956 | 652956 |
| 3.1249316 | up | XM_001053134 | LOC678760 | 678760 |
| 5.219443  | up | XM_001053095 | LOC678769 | 678769 |
| 5.2230134 | up | XM_001053100 | LOC678772 | 678772 |
| 42.180264 | up | XM_001053139 | LOC678880 | 678880 |
| 16.006252 | up | XM_001053741 | LOC678902 | 678902 |
| 16.128618 | up | XM_001054369 | LOC679038 | 679038 |
| 4.0304303 | up | XM_001054517 | LOC679060 | 679060 |
| 3.2649121 | up | XM_001054678 | LOC679094 | 679094 |
| 9.156765  | up | XM_001054754 | LOC679114 | 679114 |
| 20.050951 | up | XM_001054805 | LOC679127 | 679127 |
| 8.414015  | up | XM_001054866 | LOC679140 | 679140 |
| 4.255931  | up | XM_001054897 | LOC679148 | 679148 |
| 2.8739111 | up | XM_001054492 | LOC679159 | 679159 |
| 15.562994 | up | XM_001054731 | LOC679203 | 679203 |
| 12.659015 | up | XM_001054908 | LOC679221 | 679221 |
| 2.2165105 | up | XM_001055079 | LOC679229 | 679229 |
| 2.550526  | up | XM_001054178 | LOC679330 | 679330 |
| 41.966137 | up | XM_001056482 | LOC679462 | 679462 |

|           |    |              |           |        |
|-----------|----|--------------|-----------|--------|
| 6.967891  | up | XM_001056631 | LOC679498 | 679498 |
| 8.597648  | up | XM_001053597 | LOC679586 | 679586 |
| 7.661029  | up | XM_001053626 | LOC679594 | 679594 |
| 2.0763044 | up | XM_001053736 | LOC679612 | 679612 |
| 2.5855324 | up | XM_001053770 | LOC679623 | 679623 |
| 5.845734  | up | XM_001054118 | LOC679683 | 679683 |
| 2.9448383 | up | XM_001054040 | LOC679690 | 679690 |
| 81.70215  | up | XM_001053017 | LOC679739 | 679739 |
| 2.0363698 | up | XM_001054331 | LOC679753 | 679753 |
| 2.7859151 | up | XM_001053720 | LOC679778 | 679778 |
| 2.73171   | up | XM_001053320 | LOC679794 | 679794 |
| 2.4785533 | up | XM_001054550 | LOC679811 | 679811 |
| 18.2348   | up | XM_001054789 | LOC679823 | 679823 |
| 2.5381775 | up | XM_001054883 | LOC679899 | 679899 |
| 4.401772  | up | XM_001054952 | LOC679920 | 679920 |
| 5.6923847 | up | XM_001054981 | LOC679923 | 679923 |
| 9.935066  | up | XM_001054993 | LOC679930 | 679930 |
| 12.232918 | up | XM_001055004 | LOC679934 | 679934 |
| 6.6865053 | up | XM_001056973 | LOC679960 | 679960 |
| 7.5890117 | up | XM_001055131 | LOC679973 | 679973 |
| 3.2164273 | up | XM_001057026 | LOC679976 | 679976 |
| 3.9011683 | up | XM_001055214 | LOC680027 | 680027 |
| 3.7464588 | up | XM_001055430 | LOC680036 | 680036 |
| 2.0742495 | up | XM_001054238 | LOC680039 | 680039 |
| 7.291093  | up | XM_001056153 | LOC680040 | 680040 |
| 6.172698  | up | XM_001055512 | LOC680058 | 680058 |
| 7.959536  | up | XM_001055808 | LOC680121 | 680121 |
| 7.2380514 | up | XM_001056161 | LOC680217 | 680217 |
| 7.2196803 | up | XM_001056242 | LOC680233 | 680233 |
| 5.684924  | up | XM_001056630 | LOC680319 | 680319 |
| 8.348333  | up | XM_001056856 | LOC680363 | 680363 |
| 10.955039 | up | XM_001057084 | LOC680416 | 680416 |
| 2.4354844 | up | XM_001057727 | LOC680562 | 680562 |
| 2.6416366 | up | XM_001058222 | LOC680579 | 680579 |
| 17.830795 | up | XM_001058343 | LOC680815 | 680815 |
| 3.5485497 | up | XM_001056401 | LOC680835 | 680835 |
| 4.6236234 | up | XM_001059333 | LOC680889 | 680889 |
| 5.6871796 | up | XM_001059658 | LOC680960 | 680960 |
| 3.3371322 | up | XM_001057248 | LOC681004 | 681004 |
| 4.247395  | up | XM_001060456 | LOC681140 | 681140 |
| 2.0331175 | up | XM_001060542 | LOC681153 | 681153 |
| 5.4484563 | up | XM_001058530 | LOC681191 | 681191 |
| 18.730764 | up | XM_001060794 | LOC681219 | 681219 |
| 3.8062794 | up | XM_001060821 | LOC681222 | 681222 |

|           |    |              |           |        |
|-----------|----|--------------|-----------|--------|
| 5.355145  | up | XM_001060830 | LOC681224 | 681224 |
| 7.4688497 | up | XM_001060988 | LOC681264 | 681264 |
| 8.63226   | up | XM_001061130 | LOC681300 | 681300 |
| 2.8442025 | up | XM_001060981 | LOC681314 | 681314 |
| 2.4593287 | up | XM_001059415 | LOC681338 | 681338 |
| 10.287882 | up | XM_001061370 | LOC681351 | 681351 |
| 14.0496   | up | XM_001056725 | LOC681423 | 681423 |
| 3.2574456 | up | XM_001056855 | LOC681449 | 681449 |
| 3.228323  | up | XM_001056922 | LOC681460 | 681460 |
| 6.2225256 | up | XM_001056975 | LOC681468 | 681468 |
| 15.491234 | up | XM_001057588 | LOC681578 | 681578 |
| 2.8726196 | up | XM_001057704 | LOC681634 | 681634 |
| 2.1154394 | up | XM_001057182 | LOC681647 | 681647 |
| 2.1089442 | up | XM_001057798 | LOC681663 | 681663 |
| 5.6532655 | up | XM_001058015 | LOC681699 | 681699 |
| 3.5040362 | up | XM_001056690 | LOC681740 | 681740 |
| 11.189037 | up | XM_001058263 | LOC681754 | 681754 |
| 2.6275387 | up | XM_001058464 | LOC681796 | 681796 |
| 12.895707 | up | XM_001058594 | LOC681825 | 681825 |
| 3.2874165 | up | XM_001058694 | LOC681849 | 681849 |
| 8.387172  | up | XM_001058730 | LOC681858 | 681858 |
| 2.9645908 | up | XM_001058969 | LOC681918 | 681918 |
| 4.0262055 | up | XM_001061826 | LOC681989 | 681989 |
| 131.90854 | up | XM_001062110 | LOC681996 | 681996 |
| 12.597899 | up | XM_001060664 | LOC682248 | 682248 |
| 10.744618 | up | XM_001060932 | LOC682306 | 682306 |
| 2.7575371 | up | XM_001061367 | LOC682404 | 682404 |
| 2.0589921 | up | XM_001057922 | LOC682408 | 682408 |
| 2.0064702 | up | XM_001061636 | LOC682469 | 682469 |
| 2.8806367 | up | XM_001062710 | LOC682699 | 682699 |
| 3.690057  | up | XM_001062288 | LOC682787 | 682787 |
| 2.7861435 | up | XM_001059878 | LOC682812 | 682812 |
| 4.4490895 | up | XM_001063527 | LOC682880 | 682880 |
| 8.263284  | up | XM_001063647 | LOC682908 | 682908 |
| 5.0274916 | up | XM_001064066 | LOC682999 | 682999 |
| 19.152    | up | XM_001064186 | LOC683007 | 683007 |
| 2.001826  | up | XM_001064337 | LOC683071 | 683071 |
| 3.3640058 | up | XM_001058047 | LOC683077 | 683077 |
| 3.9575791 | up | XM_001064575 | LOC683125 | 683125 |
| 17.311718 | up | XM_001065596 | LOC683356 | 683356 |
| 2.1163619 | up | XM_001065821 | LOC683414 | 683414 |
| 10.043441 | up | XM_001065874 | LOC683420 | 683420 |
| 2.676438  | up | XM_001065905 | LOC683429 | 683429 |
| 2.0311308 | up | XM_001065985 | LOC683447 | 683447 |

|           |    |              |           |        |
|-----------|----|--------------|-----------|--------|
| 6.729275  | up | XM_001066012 | LOC683456 | 683456 |
| 3.015204  | up | NM_001080907 | LOC683504 | 683504 |
| 4.3549633 | up | XM_001066288 | LOC683512 | 683512 |
| 10.870117 | up | NM_001077530 | LOC683519 | 683519 |
| 4.9709444 | up | XM_001066346 | LOC683522 | 683522 |
| 4.3608804 | up | XM_001066577 | LOC683573 | 683573 |
| 10.811334 | up | XM_001066969 | LOC683661 | 683661 |
| 8.321168  | up | XM_001066976 | LOC683663 | 683663 |
| 3.0656738 | up | XM_001066994 | LOC683670 | 683670 |
| 8.146898  | up | XM_001064018 | LOC683674 | 683674 |
| 3.5301123 | up | XM_001064124 | LOC683722 | 683722 |
| 5.172568  | up | XM_001067309 | LOC683746 | 683746 |
| 2.6519902 | up | XM_001067973 | LOC683897 | 683897 |
| 6.151366  | up | XM_001068209 | LOC683955 | 683955 |
| 11.594931 | up | XM_001068232 | LOC683961 | 683961 |
| 4.0854964 | up | XM_001068349 | LOC683983 | 683983 |
| 3.2116578 | up | XM_001068576 | LOC684024 | 684024 |
| 8.783205  | up | XM_001068630 | LOC684035 | 684035 |
| 3.0641665 | up | XM_001068728 | LOC684063 | 684063 |
| 28.193764 | up | NM_001044283 | LOC684097 | 684097 |
| 17.123085 | up | XM_001068984 | LOC684112 | 684112 |
| 3.9383519 | up | XM_001068152 | LOC684233 | 684233 |
| 11.125013 | up | XM_001059344 | LOC684270 | 684270 |
| 2.3658462 | up | XM_001069702 | LOC684279 | 684279 |
| 2.3880558 | up | XM_001069774 | LOC684297 | 684297 |
| 3.376214  | up | XM_001069799 | LOC684304 | 684304 |
| 162.01997 | up | XM_001069861 | LOC684322 | 684322 |
| 2.5184011 | up | XM_001069884 | LOC684325 | 684325 |
| 11.854319 | up | XM_001070490 | LOC684352 | 684352 |
| 3.463682  | up | XM_001070139 | LOC684383 | 684383 |
| 3.3762028 | up | XM_001070229 | LOC684402 | 684402 |
| 152.26576 | up | XM_001072835 | LOC684425 | 684425 |
| 8.978683  | up | XM_001070638 | LOC684485 | 684485 |
| 14.399627 | up | XM_001070932 | LOC684548 | 684548 |
| 11.033116 | up | XM_001071223 | LOC684609 | 684609 |
| 2.6834064 | up | XM_001071305 | LOC684626 | 684626 |
| 7.6252933 | up | XM_001075242 | LOC684755 | 684755 |
| 2.8705611 | up | XM_001071972 | LOC684797 | 684797 |
| 4.8586073 | up | XM_001072008 | LOC684806 | 684806 |
| 2.1577034 | up | XM_001072100 | LOC684830 | 684830 |
| 3.4157457 | up | XM_001072181 | LOC684849 | 684849 |
| 2.0071228 | up | XM_001062397 | LOC684903 | 684903 |
| 4.1332316 | up | XM_001061861 | LOC685003 | 685003 |
| 3.7019825 | up | XM_001062056 | LOC685045 | 685045 |



|           |    |              |           |        |
|-----------|----|--------------|-----------|--------|
| 2.0019193 | up | XM_001062068 | LOC685050 | 685050 |
| 14.511786 | up | XM_001062200 | LOC685079 | 685079 |
| 10.310522 | up | XM_001062327 | LOC685108 | 685108 |
| 3.0444057 | up | XM_001062766 | LOC685195 | 685195 |
| 7.9890504 | up | XM_001060654 | LOC685207 | 685207 |
| 6.0489907 | up | XM_001063085 | LOC685266 | 685266 |
| 6.463801  | up | XM_001063401 | LOC685337 | 685337 |
| 6.5222163 | up | XM_001063506 | LOC685367 | 685367 |
| 41.551514 | up | XM_001064386 | LOC685575 | 685575 |
| 10.306993 | up | XM_001064444 | LOC685590 | 685590 |
| 5.555126  | up | XM_001064469 | LOC685596 | 685596 |
| 3.797477  | up | XM_001064507 | LOC685605 | 685605 |
| 3.3293047 | up | XM_001064562 | LOC685626 | 685626 |
| 76.00669  | up | XM_001064975 | LOC685718 | 685718 |
| 3.8750145 | up | XM_001060860 | LOC685778 | 685778 |
| 2.199958  | up | XM_001062929 | LOC685939 | 685939 |
| 2.4863586 | up | XM_001065880 | LOC685941 | 685941 |
| 2.0706334 | up | XM_001066160 | LOC686011 | 686011 |
| 2.5256665 | up | XM_001066359 | LOC686055 | 686055 |
| 3.5472527 | up | XM_001066392 | LOC686066 | 686066 |
| 5.0322595 | up | XM_001066660 | LOC686139 | 686139 |
| 9.681729  | up | XM_001072758 | LOC686172 | 686172 |
| 3.7132785 | up | XM_001072846 | LOC686197 | 686197 |
| 16.060513 | up | XM_001073157 | LOC686259 | 686259 |
| 2.274835  | up | XM_001073192 | LOC686268 | 686268 |
| 16.987745 | up | XM_001073320 | LOC686289 | 686289 |
| 2.7569356 | up | XM_001073550 | LOC686326 | 686326 |
| 10.426562 | up | XM_001073919 | LOC686393 | 686393 |
| 5.3278985 | up | XM_001074019 | LOC686418 | 686418 |
| 2.5671515 | up | XM_001074132 | LOC686442 | 686442 |
| 5.769835  | up | XM_001074155 | LOC686547 | 686547 |
| 10.228831 | up | XM_001074992 | LOC686617 | 686617 |
| 2.6424978 | up | XM_001075058 | LOC686634 | 686634 |
| 6.514047  | up | XM_001075174 | LOC686661 | 686661 |
| 5.002107  | up | XM_001075602 | LOC686765 | 686765 |
| 5.156962  | up | XM_001075752 | LOC686791 | 686791 |
| 221.76659 | up | XM_001076593 | LOC686979 | 686979 |
| 14.224777 | up | XM_001076594 | LOC686980 | 686980 |
| 4.0948715 | up | XM_001078569 | LOC687029 | 687029 |
| 8.1314945 | up | XM_001076906 | LOC687057 | 687057 |
| 3.9701774 | up | XM_001077450 | LOC687188 | 687188 |
| 32.239426 | up | XM_001077650 | LOC687237 | 687237 |
| 64.393    | up | XM_001073281 | LOC687295 | 687295 |
| 2.0025055 | up | XM_001077929 | LOC687308 | 687308 |

|           |    |              |           |        |
|-----------|----|--------------|-----------|--------|
| 5.763305  | up | XM_001075972 | LOC687346 | 687346 |
| 7.711821  | up | XM_001073681 | LOC687395 | 687395 |
| 3.6647708 | up | XM_001075341 | LOC687439 | 687439 |
| 7.5090547 | up | XM_001079167 | LOC687565 | 687565 |
| 29.301079 | up | NM_001044291 | LOC687575 | 687575 |
| 12.489047 | up | XM_001079384 | LOC687610 | 687610 |
| 9.038615  | up | XM_001079870 | LOC687711 | 687711 |
| 8.165037  | up | XM_001079878 | LOC687713 | 687713 |
| 3.946463  | up | XM_001079978 | LOC687738 | 687738 |
| 4.4991336 | up | XM_001080119 | LOC687780 | 687780 |
| 10.488231 | up | XM_001080149 | LOC687788 | 687788 |
| 11.738886 | up | XM_001080179 | LOC687797 | 687797 |
| 2.0107222 | up | XM_001080216 | LOC687808 | 687808 |
| 2.1500762 | up | XM_001081046 | LOC688073 | 688073 |
| 2.5254695 | up | XM_001081257 | LOC688136 | 688136 |
| 2.0327358 | up | XM_001081294 | LOC688146 | 688146 |
| 11.68443  | up | XM_001081379 | LOC688169 | 688169 |
| 118.61075 | up | XM_001081394 | LOC688173 | 688173 |
| 2.1739244 | up | XM_001081414 | LOC688176 | 688176 |
| 6.077757  | up | XM_001081476 | LOC688199 | 688199 |
| 6.232457  | up | XM_001081553 | LOC688228 | 688228 |
| 36.780838 | up | XM_001081743 | LOC688284 | 688284 |
| 3.637016  | up | XM_001081751 | LOC688289 | 688289 |
| 3.8268888 | up | XM_001081771 | LOC688296 | 688296 |
| 4.6333437 | up | XM_001081793 | LOC688310 | 688310 |
| 2.7156436 | up | XM_001081794 | LOC688311 | 688311 |
| 3.458111  | up | XM_001081813 | LOC688318 | 688318 |
| 28.637037 | up | XM_001081867 | LOC688342 | 688342 |
| 8.089191  | up | XM_001081873 | LOC688346 | 688346 |
| 12.088381 | up | XM_001081917 | LOC688369 | 688369 |
| 7.087788  | up | XM_001066740 | LOC688393 | 688393 |
| 6.3358407 | up | XM_001066841 | LOC688415 | 688415 |
| 2.9942355 | up | XM_001067693 | LOC688631 | 688631 |
| 2.5112512 | up | XM_001067869 | LOC688680 | 688680 |
| 9.8492775 | up | XM_001068010 | LOC688708 | 688708 |
| 2.2965598 | up | XM_001068022 | LOC688712 | 688712 |
| 4.9712744 | up | XM_001068279 | LOC688784 | 688784 |
| 9.092134  | up | XM_001068644 | LOC688869 | 688869 |
| 2.026814  | up | XM_001068750 | LOC688899 | 688899 |
| 2.2348864 | up | XM_001066146 | LOC688948 | 688948 |
| 2.1128304 | up | XM_001068983 | LOC688963 | 688963 |
| 2.80796   | up | XM_001067949 | LOC688966 | 688966 |
| 7.4583335 | up | XM_001066261 | LOC688981 | 688981 |
| 21.500626 | up | XM_001069372 | LOC689064 | 689064 |

|            |    |              |           |        |
|------------|----|--------------|-----------|--------|
| 16.68174   | up | XM_001069421 | LOC689075 | 689075 |
| 2.1194413  | up | XM_001059239 | LOC689141 | 689141 |
| 31.37539   | up | XM_001065008 | LOC689226 | 689226 |
| 5.4676795  | up | XM_001070212 | LOC689271 | 689271 |
| 8.0405445  | up | XM_001070462 | LOC689343 | 689343 |
| 11.4667635 | up | XM_001070681 | LOC689408 | 689408 |
| 7.8882217  | up | XM_001070485 | LOC689908 | 689908 |
| 7.327304   | up | XM_001065356 | LOC689959 | 689959 |
| 10.5048065 | up | XM_001073955 | LOC690000 | 690000 |
| 7.404454   | up | XM_001072961 | LOC690022 | 690022 |
| 2.7651463  | up | XM_001073174 | LOC690080 | 690080 |
| 4.561479   | up | XM_001073696 | LOC690214 | 690214 |
| 2.0718362  | up | XM_001074295 | LOC690384 | 690384 |
| 2.4830968  | up | XM_001074777 | LOC690550 | 690550 |
| 2.6760216  | up | XM_001075416 | LOC690732 | 690732 |
| 3.11965    | up | XM_001075556 | LOC690769 | 690769 |
| 2.2258346  | up | XM_001075806 | LOC690829 | 690829 |
| 6.1354427  | up | XM_001076513 | LOC691013 | 691013 |
| 3.336217   | up | XM_001076820 | LOC691093 | 691093 |
| 3.9501967  | up | XM_001077205 | LOC691204 | 691204 |
| 7.317188   | up | XM_001077261 | LOC691222 | 691222 |
| 12.69611   | up | XM_001077406 | LOC691255 | 691255 |
| 2.1729956  | up | XM_001075994 | LOC691392 | 691392 |
| 2.276435   | up | XM_001078336 | LOC691453 | 691453 |
| 3.875286   | up | XM_001078599 | LOC691510 | 691510 |
| 3.6373682  | up | XM_001070198 | LOC691532 | 691532 |
| 3.36319    | up | XM_001072690 | LOC691675 | 691675 |
| 2.123285   | up | XM_001079338 | LOC691708 | 691708 |
| 2.7504764  | up | XM_001079361 | LOC691716 | 691716 |
| 2.9415483  | up | XM_001073008 | LOC691729 | 691729 |
| 26.690962  | up | XM_001079573 | LOC691768 | 691768 |
| 5.1065645  | up | XM_001079616 | LOC691781 | 691781 |
| 2.0739424  | up | XM_001079898 | LOC691862 | 691862 |
| 6.9930625  | up | XM_001080361 | LOC691960 | 691960 |
| 12.368537  | up | NM_133404    | Lonp1     | 170916 |
| 4.884077   | up | NM_001033689 | Lonp2     | 291922 |
| 4.4445186  | up | XM_001066614 | Lonrf1    | 306505 |
| 2.5355303  | up | NM_017061    | Lox       | 24914  |
| 7.103039   | up | NM_001012125 | Loxl1     | 315714 |
| 2.1577847  | up | XM_001069281 | Loxl2     | 290350 |
| 2.2421312  | up | XM_001066093 | Loxl3     | 312478 |
| 3.2999835  | up | NM_053936    | Lpar1     | 116744 |
| 3.0435636  | up | NM_001045843 | Lpar6     | 691774 |
| 6.0913396  | up | NM_001012189 | Lpcat3    | 362434 |

|           |    |              |         |        |
|-----------|----|--------------|---------|--------|
| 5.9256215 | up | XM_001053537 | Lpgat1  | 679692 |
| 8.336193  | up | NM_001014184 | Lpin3   | 362261 |
| 46.730644 | up | NM_012598    | Lpl     | 24539  |
| 2.1226022 | up | NM_001009649 | Lpxn    | 293783 |
| 2.7983348 | up | XM_001066905 | Lrba    | 361975 |
| 3.1205244 | up | XM_001076882 | Lrig1   | 312574 |
| 2.499358  | up | XM_001065921 | Lrig2   | 310753 |
| 2.3981016 | up | XM_001056970 | Lrp1    | 299858 |
| 6.132874  | up | XM_001071349 | Lrp6    | 312781 |
| 5.0357485 | up | NM_001024354 | Lrrc14  | 500900 |
| 6.0468    | up | XM_001059957 | Lrrc14b | 502225 |
| 7.5676737 | up | NM_001012001 | Lrrc2   | 301033 |
| 5.5899644 | up | XM_001054231 | Lrrc30  | 301711 |
| 2.646926  | up | NM_001034926 | Lrrc40  | 310946 |
| 9.968986  | up | NM_001009710 | Lrrc41  | 362566 |
| 3.498278  | up | NM_001025653 | Lrrc42  | 298309 |
| 5.078075  | up | XM_001076460 | Lrrc47  | 362672 |
| 2.1824    | up | NM_001008280 | Lrrc59  | 287633 |
| 7.103701  | up | NM_001024761 | Lrrfip2 | 301035 |
| 14.606638 | up | NM_001013421 | Lsg1    | 288029 |
| 23.888735 | up | XM_001056695 | Lsm10   | 366468 |
| 2.3054473 | up | XM_001081506 | Lsm12   | 287731 |
| 3.903534  | up | XM_001060866 | Lsm2    | 684148 |
| 11.535998 | up | XM_001067054 | Lsm4    | 290647 |
| 2.544901  | up | XM_001059585 | Lsm5    | 306222 |
| 2.833182  | up | XM_001076086 | Lsm7    | 362829 |
| 3.850489  | up | XM_001058762 | Lsm8    | 296913 |
| 4.0844526 | up | XM_001079364 | Lsmd1   | 287429 |
| 4.419414  | up | XM_001064695 | Lsp1    | 361680 |
| 2.0943778 | up | NM_031049    | Lss     | 81681  |
| 9.340592  | up | NM_001030031 | Lta4h   | 299732 |
| 25.055073 | up | NM_021587    | Ltbp1   | 59107  |
| 6.9134364 | up | XM_001077795 | Ltbp4   | 292734 |
| 11.342156 | up | NM_001014157 | Ltv1    | 361452 |
| 4.4867578 | up | NM_001024269 | Luc71   | 360503 |
| 13.143048 | up | XM_231620    | Luc712  | 312251 |
| 8.843191  | up | XM_001081177 | Luc713  | 360602 |
| 4.2686152 | up | NM_031050    | Lum     | 81682  |
| 2.48505   | up | XM_001054995 | Lvrn    | 502160 |
| 2.8152764 | up | NM_031655    | Lxn     | 59073  |
| 4.5678945 | up | NM_020103    | Ly6c    | 56778  |
| 24.913897 | up | NM_001017467 | Ly6e    | 362934 |
| 2.8267787 | up | NM_001024279 | Ly96    | 448830 |
| 7.3134885 | up | NM_001011911 | Lyar    | 289707 |

|           |    |              |            |        |
|-----------|----|--------------|------------|--------|
| 2.8965366 | up | XM_001069286 | Lynx1      | 300018 |
| 6.1290035 | up | NM_013006    | Lypla1     | 25514  |
| 5.317867  | up | XM_001079111 | Lyrml      | 365361 |
| 2.259559  | up | XM_001059473 | Lysmd2     | 300839 |
| 2.803811  | up | NM_001009698 | Lysmd3     | 315923 |
| 3.412011  | up | NM_012771    | Lyz2       | 25211  |
| 14.887085 | up | XM_001066088 | Lztr1      | 360745 |
| 17.494823 | up | XM_001055153 | Macf1      | 362587 |
| 135.49377 | up | NM_139337    | Macrodl    | 246233 |
| 2.640028  | up | XM_001055286 | Mad1l1     | 680006 |
| 8.422546  | up | NM_001009699 | Mad2l1bp   | 316237 |
| 7.1314554 | up | NM_001012106 | Mad2l2     | 313702 |
| 18.845701 | up | NM_001008319 | Maea       | 298982 |
| 81.51627  | up | NM_001014085 | Maf1       | 315093 |
| 6.507101  | up | NM_022386    | Mafg       | 64188  |
| 15.756464 | up | NM_145673    | Mafk       | 246760 |
| 7.645879  | up | NM_080479    | Maged2     | 113947 |
| 3.4461079 | up | NM_001013250 | Mageh1     | 367767 |
| 5.2426524 | up | NM_001014109 | Magix      | 317379 |
| 2.0027678 | up | XM_001081552 | Magmas-ps1 | 287065 |
| 3.2264392 | up | XM_001066689 | Magoh      | 298385 |
| 21.165878 | up | NM_053946    | Magt1      | 116967 |
| 8.916266  | up | NM_001014002 | Mak16      | 306526 |
| 3.4597597 | up | XM_001060470 | Malt1      | 307366 |
| 13.941937 | up | XM_001062587 | Man1a2     | 295319 |
| 2.2718618 | up | XM_001067370 | Man1c1     | 362625 |
| 10.725672 | up | NM_139256    | Man2c1     | 246136 |
| 4.424013  | up | NM_001031655 | Manba      | 310864 |
| 4.2356977 | up | XM_001067976 | Manbal     | 499934 |
| 2.0280516 | up | NM_080785    | Manea      | 140808 |
| 13.594519 | up | XM_001072112 | Manf       | 315989 |
| 2.2457855 | up | NM_030995    | Map1a      | 25152  |
| 37.395454 | up | NM_199500    | Map1lc3a   | 362245 |
| 44.055588 | up | NM_022867    | Map1lc3b   | 64862  |
| 59.253002 | up | NM_031643    | Map2k1     | 170851 |
| 50.229786 | up | NM_133283    | Map2k2     | 58960  |
| 5.3960953 | up | NM_001033987 | Map2k5     | 29568  |
| 8.5378685 | up | NM_053703    | Map2k6     | 114495 |
| 2.9697354 | up | NM_053887    | Map3k1     | 116667 |
| 3.733303  | up | XM_001081582 | Map3k3     | 303604 |
| 7.2425957 | up | XM_001063040 | Map3k4     | 308106 |
| 8.222978  | up | XM_001062961 | Map3k7     | 313121 |
| 11.551122 | up | NM_001012062 | Map3k7ip2  | 308267 |
| 5.399244  | up | NM_001024278 | Map4       | 367171 |

|            |    |              |          |        |
|------------|----|--------------|----------|--------|
| 12.532485  | up | XM_001055154 | Map4k3   | 170920 |
| 3.205512   | up | XM_001058485 | Map4k4   | 301363 |
| 3.6322553  | up | XM_001076790 | Map4k5   | 503027 |
| 33.0264    | up | XM_001058588 | Map7d1   | 681287 |
| 24.949413  | up | NM_053842    | Mapk1    | 116590 |
| 64.79351   | up | NM_021746    | Mapk12   | 60352  |
| 2.3273497  | up | NM_031020    | Mapk14   | 81649  |
| 2.406444   | up | NM_053777    | Mapk8ip1 | 116457 |
| 3.1921313  | up | NM_001011964 | Mapkap1  | 296648 |
| 8.360099   | up | NM_178102    | Mapkapk2 | 289014 |
| 2.200281   | up | NM_001012127 | Mapkapk3 | 315994 |
| 34.874363  | up | NM_001025761 | Mapkapk5 | 498183 |
| 4.498789   | up | NM_138509    | Mapre1   | 114764 |
| 28.552498  | up | NM_001007656 | Mapre3   | 298848 |
| 10.927006  | up | NM_017212    | Mapt     | 29477  |
| 5.7819176  | up | NM_001034936 | Mare     | 360505 |
| 8.572399   | up | NM_021699    | Mark2    | 60328  |
| 6.4640317  | up | NM_130749    | Mark3    | 170577 |
| 2.0332747  | up | NM_012757    | Mas1     | 25153  |
| 2.3534045  | up | NM_172043    | Masp2    | 64459  |
| 6.423706   | up | XM_001070900 | Mast2    | 313819 |
| 14.6132    | up | NM_134351    | Mat2a    | 171347 |
| 3.8797202  | up | NM_001044282 | Mat2b    | 683630 |
| 8.7528715  | up | NM_019149    | Matr3    | 29150  |
| 27.506544  | up | NM_021588    | Mb       | 59108  |
| 20.312233  | up | XM_001055992 | Mbd2     | 680172 |
| 22.131853  | up | XM_001076468 | Mbd3     | 362834 |
| 6.9631786  | up | XM_001059437 | Mbd4     | 680915 |
| 2.1115682  | up | XM_343219    | Mbd6     | 362892 |
| 2.7344968  | up | XM_001075945 | Mbip     | 362740 |
| 11.86491   | up | XM_001062557 | Mbnl1    | 282635 |
| 9.076644   | up | NM_053569    | Mbtps1   | 89842  |
| 2.300178   | up | NM_013182    | Mc5r     | 25726  |
| 23.867529  | up | NM_023983    | Mcam     | 78967  |
| 10.0903425 | up | NM_001024785 | Mcart1   | 313241 |
| 5.21227    | up | NM_001009653 | Mccc1    | 294972 |
| 18.661585  | up | NM_001012177 | Mccc2    | 361884 |
| 4.1796374  | up | XM_001058655 | Mcee     | 293829 |
| 2.3141809  | up | NM_053951    | Mcf2l    | 117020 |
| 7.753562   | up | NM_139253    | Mcfd2    | 246117 |
| 7.537277   | up | NM_021846    | Mcl1     | 60430  |
| 4.1021338  | up | XM_001079670 | Mcm3ap   | 294339 |
| 20.166737  | up | NM_001004203 | Mcm7     | 288532 |
| 8.236077   | up | XM_001057747 | Mcoln1   | 288371 |

|            |    |              |          |        |
|------------|----|--------------|----------|--------|
| 5.395574   | up | XM_001062111 | Mcrs1    | 300222 |
| 2.8258388  | up | XM_227971    | Mdc1     | 309595 |
| 6.746657   | up | XM_241623    | Mdga1    | 309659 |
| 20.034363  | up | NM_033235    | Mdh1     | 24551  |
| 117.60622  | up | NM_031151    | Mdh2     | 81829  |
| 10.583751  | up | XM_001080981 | Mdm2     | 314856 |
| 7.3806314  | up | NM_001012026 | Mdm4     | 304798 |
| 5.557255   | up | XM_001059939 | Mdp1     | 290230 |
| 15.468399  | up | NM_012600    | Me1      | 24552  |
| 8.989706   | up | XM_001060753 | Me3      | 361602 |
| 4.571356   | up | NM_001044286 | Mea1     | 685131 |
| 2.0009687  | up | XM_001065376 | Mecom    | 294924 |
| 12.345433  | up | NM_017209    | Mecr     | 29470  |
| 2.5056648  | up | XM_001081351 | Med1     | 497991 |
| 3.252328   | up | XM_001062474 | Med10    | 290939 |
| 4.91599    | up | XM_001079811 | Med11    | 287456 |
| 9.410716   | up | XM_001054608 | Med12    | 679693 |
| 3.0121999  | up | XM_001081130 | Med13    | 303403 |
| 2.9335938  | up | XM_001079998 | Med13l   | 360817 |
| 3.8172338  | up | XM_001056908 | Med14    | 317343 |
| 3.0035028  | up | NM_001013178 | Med20    | 316209 |
| 4.578519   | up | XM_001074060 | Med21    | 312849 |
| 2.177099   | up | NM_001077679 | Med22    | 499762 |
| 11.3015585 | up | NM_001034079 | Med24    | 619436 |
| 6.2759805  | up | XM_001080653 | Med25    | 292889 |
| 3.2947414  | up | XM_001076126 | Med27    | 296612 |
| 5.313355   | up | XM_001065742 | Med30    | 299905 |
| 5.6085505  | up | XM_001055672 | Med6     | 299180 |
| 24.721994  | up | NM_001014035 | Mef2a    | 309957 |
| 20.991358  | up | XM_001056692 | Mef2c    | 499497 |
| 10.739155  | up | NM_001029917 | Memo1    | 298787 |
| 6.753216   | up | NM_001008345 | Mesdc2   | 308796 |
| 7.516636   | up | NM_031517    | Met      | 24553  |
| 56.768368  | up | XM_001078398 | Metap1   | 295500 |
| 6.4392705  | up | NM_022539    | Metap2   | 64370  |
| 6.140598   | up | XM_001053790 | Mett11d1 | 305845 |
| 13.884694  | up | NM_001025019 | Mettl11a | 362103 |
| 3.9762273  | up | XM_001070243 | Mettl13  | 289159 |
| 3.457479   | up | XM_001075415 | Mettl14  | 295428 |
| 4.290134   | up | XM_001081558 | Mettl2   | 363687 |
| 5.3383055  | up | NM_001007623 | Mettl6   | 290564 |
| 4.102428   | up | NM_001037355 | Mettl7a  | 315306 |
| 2.5435529  | up | XM_225735    | Mex3c    | 307271 |
| 5.238544   | up | NM_001007609 | Mfap3    | 287299 |

|           |    |              |           |        |
|-----------|----|--------------|-----------|--------|
| 16.769636 | up | NM_001034124 | Mfap4     | 287382 |
| 20.914383 | up | NM_001040186 | Mfge8     | 25277  |
| 6.207044  | up | NM_138976    | Mfn1      | 192647 |
| 37.682247 | up | XM_342258    | Mfsd1     | 361957 |
| 3.3263085 | up | NM_001024908 | Mfsd3     | 500899 |
| 38.298725 | up | XM_235689    | Mfsd5     | 315329 |
| 5.6426663 | up | NM_001047910 | Mfsd8     | 361939 |
| 2.3160527 | up | NM_030861    | Mgat1     | 81519  |
| 5.4974484 | up | NM_053604    | Mgat2     | 94273  |
| 3.0146549 | up | NM_001024357 | MGC105560 | 500941 |
| 5.879122  | up | NM_001012353 | MGC108823 | 307414 |
| 7.121605  | up | NM_001025718 | MGC112830 | 361178 |
| 3.5386071 | up | NM_001024905 | MGC116121 | 498830 |
| 2.7611377 | up | NM_001037362 | MGC125086 | 498695 |
| 3.1713493 | up | NM_001077231 | MGC125239 | 686179 |
| 2.1662855 | up | NM_001009538 | MGC72612  | 494340 |
| 27.515537 | up | NM_001009543 | MGC72955  | 494346 |
| 3.352377  | up | NM_198772    | MGC72974  | 316976 |
| 14.814352 | up | NM_001004221 | MGC93975  | 292878 |
| 98.05871  | up | NM_001004204 | MGC94190  | 288616 |
| 2.8600962 | up | NM_001004272 | MGC94192  | 360550 |
| 3.2063525 | up | NM_001007746 | MGC94199  | 362483 |
| 4.2671075 | up | NM_001007751 | MGC94207  | 362946 |
| 150.43436 | up | NM_001006964 | MGC94542  | 290631 |
| 14.581758 | up | NM_131904    | Mgea5     | 154968 |
| 7.3821025 | up | NM_138502    | Mgll      | 29254  |
| 4.835514  | up | NM_012861    | Mgmt      | 25332  |
| 64.153145 | up | NM_012862    | Mgp       | 25333  |
| 4.5770316 | up | NM_001013964 | Mgrn1     | 302938 |
| 2.111917  | up | NM_134349    | Mgst1     | 171341 |
| 9.730585  | up | XM_001054384 | Mgst2     | 295037 |
| 3.55964   | up | XM_001072091 | Mib1      | 307594 |
| 14.455734 | up | XM_001074357 | Mical2    | 365352 |
| 2.2838612 | up | XM_221956    | Micall2   | 288515 |
| 3.4662    | up | NM_206950    | Mid1ip1   | 404280 |
| 2.7310789 | up | XM_001058293 | Mier1     | 313418 |
| 4.0928907 | up | NM_031051    | Mif       | 81683  |
| 11.955647 | up | NM_001014122 | Mif4gd    | 360659 |
| 5.2799444 | up | NM_001017450 | Miip      | 298643 |
| 2.4685342 | up | XM_001079459 | Mink1     | 303259 |
| 5.0807915 | up | XM_001079775 | Minpp1    | 29688  |
| 3.2956638 | up | XM_001055421 | Mios      | 362324 |
| 10.736557 | up | NM_031052    | Mipep     | 81684  |
| 2.5555122 | up | NM_001009714 | Mitd1     | 363219 |



|            |    |              |           |        |
|------------|----|--------------|-----------|--------|
| 3.3848767  | up | XM_001065288 | Mitf      | 25094  |
| 19.902142  | up | NM_031359    | Mkln1     | 83536  |
| 2.3975992  | up | NM_001044267 | Mknk1     | 500526 |
| 7.3331356  | up | NM_001004233 | Mkrn1     | 296988 |
| 2.4038105  | up | NM_001008314 | Mkrn2     | 297525 |
| 3.196344   | up | NM_001013983 | Mlec      | 304543 |
| 11.1388    | up | XM_001065492 | Mlf1      | 310483 |
| 34.878593  | up | XM_001062959 | Mlf2      | 312709 |
| 2.7558398  | up | NM_031053    | Mlh1      | 81685  |
| 2.0777028  | up | XM_001067729 | Mll1      | 315606 |
| 4.0997467  | up | XM_341829    | Mll4      | 361543 |
| 3.6919506  | up | XM_001059647 | Mll5      | 311968 |
| 2.00038    | up | NM_001012162 | Mllt10    | 361285 |
| 3.2976818  | up | NM_053718    | Mllt3     | 114510 |
| 14.782301  | up | NM_001034112 | Mlx       | 360631 |
| 2.3689573  | up | NM_133552    | Mlxipl    | 171078 |
| 4.288536   | up | XM_001074396 | Mmaa      | 291939 |
| 6.3002405  | up | XM_001066599 | Mmachc    | 313520 |
| 34.060085  | up | NM_001004280 | Mmadhc    | 362134 |
| 2.5710015  | up | NM_001007673 | Mmd       | 303439 |
| 3.1370227  | up | XM_001057974 | Mmgt1     | 302864 |
| 18.858606  | up | NM_153472    | Mnat1     | 266713 |
| 2.4198165  | up | NM_001033891 | Mobkl1b   | 297387 |
| 4.822501   | up | NM_133528    | Mobkl3    | 171050 |
| 3.0866776  | up | XM_001062845 | Mocs1     | 301221 |
| 34.852802  | up | NM_001007633 | Mocs2     | 294753 |
| 2.6549203  | up | XM_001059515 | Mogat1    | 363261 |
| 4.658569   | up | XM_001074544 | Mon1a     | 315999 |
| 4.32995    | up | XM_001053843 | Mon2      | 314894 |
| 3.2445707  | up | XM_001065170 | Morc2     | 289736 |
| 6.1748304  | up | XM_001054868 | Morc3     | 304074 |
| 2.7216902  | up | XM_001053814 | Morc4     | 315914 |
| 21.072481  | up | NM_001011999 | Morf4l1   | 300891 |
| 34.571877  | up | NM_001007714 | Morf4l2   | 317413 |
| 6.8690147  | up | NM_001047847 | Morg1     | 288924 |
| 3.7537568  | up | NM_001024975 | Morn4     | 293950 |
| 2.733753   | up | NM_001014107 | Mospd1    | 317312 |
| 7.3597646  | up | NM_001025629 | Mospd3    | 288557 |
| 7.7398252  | up | XM_001078776 | Mpdu1     | 303244 |
| 22.313118  | up | NM_019196    | Mpdz      | 29365  |
| 3.7963111  | up | XM_001058593 | Mphosph10 | 293828 |
| 10.3241415 | up | NM_001017375 | Mphosph8  | 290270 |
| 2.3988872  | up | NM_001085406 | Mpnd      | 681944 |
| 3.3078754  | up | XM_001061133 | Mpp3      | 114202 |

|           |    |              |        |        |
|-----------|----|--------------|--------|--------|
| 14.321079 | up | XM_001080868 | Mpp5   | 314259 |
| 20.434294 | up | XM_001056864 | Mpp6   | 362359 |
| 2.3622277 | up | XM_001061023 | Mpp7   | 307035 |
| 3.2997806 | up | XM_001066434 | Mppe1  | 361344 |
| 2.149718  | up | NM_198778    | Mpped2 | 362185 |
| 6.3894157 | up | NM_001034022 | Mprip  | 116504 |
| 10.83413  | up | NM_138843    | Mpst   | 192172 |
| 4.7370753 | up | NM_001098240 | Mpv171 | 360463 |
| 2.6297317 | up | XM_001072782 | Mrc1   | 291327 |
| 7.7245607 | up | XM_001056335 | Mreg   | 501162 |
| 13.065869 | up | NM_001009264 | Mrfap1 | 282585 |
| 7.3835225 | up | NM_001010947 | Mri1   | 288912 |
| 2.7194726 | up | XM_001069850 | Mrpl1  | 289491 |
| 6.535639  | up | NM_001006973 | mrpl11 | 293666 |
| 5.2204127 | up | NM_001006985 | Mrpl13 | 299938 |
| 13.622522 | up | XM_001067192 | Mrpl14 | 301250 |
| 32.180115 | up | XM_001062230 | Mrpl15 | 297799 |
| 25.505781 | up | NM_001009647 | Mrpl16 | 293754 |
| 6.185593  | up | NM_133539    | Mrpl17 | 171061 |
| 7.9974146 | up | XM_001062578 | Mrpl18 | 292244 |
| 2.1757221 | up | NM_001029898 | Mrpl19 | 297372 |
| 4.429488  | up | NM_001034136 | Mrpl2  | 301240 |
| 20.600471 | up | XM_001058684 | Mrpl20 | 680747 |
| 9.646676  | up | XM_001067014 | Mrpl21 | 309140 |
| 20.027834 | up | XM_001074937 | Mrpl22 | 287302 |
| 5.6690316 | up | NM_022529    | Mrpl23 | 64360  |
| 11.362665 | up | XM_001081298 | Mrpl27 | 287635 |
| 85.01543  | up | XM_001072824 | Mrpl3  | 300974 |
| 9.473324  | up | XM_001057859 | Mrpl30 | 301352 |
| 11.276664 | up | NM_001006965 | Mrpl34 | 290632 |
| 7.747844  | up | XM_001063053 | Mrpl35 | 297334 |
| 9.597979  | up | XM_001061033 | Mrpl36 | 364656 |
| 21.633768 | up | NM_001004235 | Mrpl37 | 56281  |
| 45.503616 | up | NM_001009369 | Mrpl38 | 303685 |
| 7.838695  | up | XM_001071006 | Mrpl4  | 363023 |
| 2.1205273 | up | NM_001013426 | Mrpl41 | 296551 |
| 4.735394  | up | XM_001077569 | Mrpl42 | 299743 |
| 2.0496025 | up | XM_001057703 | Mrpl43 | 309440 |
| 9.037587  | up | NM_001031650 | Mrpl44 | 301552 |
| 46.96526  | up | XM_001081368 | Mrpl45 | 287656 |
| 6.539018  | up | XM_001067066 | Mrpl48 | 293149 |
| 8.564081  | up | XM_001054942 | Mrpl50 | 362517 |
| 12.551147 | up | XM_001063524 | Mrpl51 | 297601 |
| 6.773809  | up | XM_001053719 | Mrpl52 | 361037 |

|           |    |              |         |        |
|-----------|----|--------------|---------|--------|
| 22.371937 | up | XM_001072540 | Mrpl53  | 362388 |
| 8.873339  | up | XM_001075791 | Mrpl54  | 299628 |
| 6.7380395 | up | XM_001075243 | Mrpl55  | 287356 |
| 8.748748  | up | NM_001007696 | mrpl9   | 310653 |
| 8.871075  | up | XM_001059288 | Mrps11  | 499185 |
| 2.1721108 | up | XM_001078443 | Mrps12  | 292758 |
| 5.2334785 | up | XM_001069236 | Mrps14  | 289143 |
| 18.639025 | up | NM_001007653 | Mrps15  | 298517 |
| 10.292562 | up | XM_001078418 | Mrps17  | 288621 |
| 2.5904818 | up | NM_198756    | Mrps18a | 301249 |
| 38.484505 | up | NM_212534    | Mrps18b | 294230 |
| 2.781644  | up | XM_001067441 | Mrps18c | 289469 |
| 13.926496 | up | XM_001079091 | Mrps2   | 362094 |
| 25.9949   | up | XM_001057655 | Mrps211 | 364906 |
| 19.208302 | up | XM_001081199 | Mrps23  | 360594 |
| 3.919223  | up | NM_001025408 | Mrps25  | 297459 |
| 8.001023  | up | NM_001013206 | Mrps26  | 362216 |
| 3.537674  | up | XM_001069213 | Mrps28  | 689025 |
| 9.852839  | up | XM_001068885 | Mrps30  | 294767 |
| 4.7317615 | up | NM_001047863 | Mrps33  | 296995 |
| 20.435484 | up | XM_001078600 | Mrps5   | 296134 |
| 15.054354 | up | XM_001081692 | Mrps7   | 113958 |
| 9.689332  | up | XM_001059532 | Mrps9   | 301371 |
| 3.471426  | up | NM_001008354 | Mrrf    | 311903 |
| 3.5121734 | up | NM_024001    | Mrs2    | 79032  |
| 3.3337312 | up | XM_001071573 | Mrto4   | 298586 |
| 2.8696713 | up | XM_001075321 | Ms4a4a  | 361734 |
| 5.205077  | up | XM_001063707 | Msc     | 312897 |
| 3.1834033 | up | NM_031058    | Msh2    | 81709  |
| 10.088982 | up | XM_239335    | Msl1    | 303514 |
| 8.448501  | up | XM_001071576 | Msl2    | 315959 |
| 4.7354503 | up | NM_030863    | Msn     | 81521  |
| 3.5834994 | up | NM_053307    | Msra    | 29447  |
| 6.4011    | up | NM_001031660 | Msrp2   | 361286 |
| 11.454922 | up | NM_019151    | Mstn    | 29152  |
| 5.402968  | up | XM_001074220 | Msto1   | 295237 |
| 5.9507265 | up | NM_138826    | Mt1a    | 24567  |
| 61.181934 | up | NM_022588    | Mta1    | 64520  |
| 4.1553354 | up | XM_001077908 | Mta2    | 361724 |
| 2.537825  | up | XM_216633    | Mta3    | 298763 |
| 19.554506 | up | XM_215358    | Mtch1   | 294313 |
| 25.591305 | up | XM_001065976 | Mtch2   | 295922 |
| 13.984008 | up | NM_133398    | Mtdh    | 170910 |
| 4.781869  | up | XM_001055855 | Mtf1    | 362591 |

|           |    |              |         |        |
|-----------|----|--------------|---------|--------|
| 3.9117107 | up | XM_001056894 | Mtf2    | 360905 |
| 12.597525 | up | NM_001009697 | Mtfmt   | 315763 |
| 2.150465  | up | XM_001055144 | Mtfr1   | 311403 |
| 4.875161  | up | NM_022508    | Mthfd1  | 64300  |
| 2.9532404 | up | XM_001065359 | Mthfd11 | 361472 |
| 2.67017   | up | NM_001009349 | Mthfs   | 300886 |
| 6.07886   | up | NM_001004254 | Mtif2   | 305606 |
| 5.1644087 | up | NM_001013047 | Mtm1    | 288762 |
| 7.5693145 | up | XM_001059230 | Mtmr1   | 317296 |
| 2.3478448 | up | XM_001076560 | Mtmr14  | 312634 |
| 4.1777234 | up | XM_001081167 | Mtmr4   | 287607 |
| 13.644967 | up | XM_001065057 | Mtmr6   | 305935 |
| 3.6906571 | up | NM_001005761 | Mtmr9   | 282584 |
| 4.89456   | up | XM_217208    | Mto1    | 300852 |
| 15.365149 | up | NM_019906    | Mtor    | 56718  |
| 4.754939  | up | NM_001006960 | Mtp18   | 289745 |
| 4.604474  | up | XM_001056452 | Mtpap   | 307050 |
| 12.315067 | up | NM_024374    | Mtpn    | 79215  |
| 2.7149804 | up | NM_001025723 | Mtrf11  | 361473 |
| 9.400668  | up | NM_001039003 | Mtrr    | 290947 |
| 2.2977183 | up | XM_001077379 | Mtss11  | 307845 |
| 5.5333896 | up | NM_001015013 | Mtvr2   | 309170 |
| 4.997358  | up | XM_001074374 | Mtx1    | 295241 |
| 3.2828712 | up | XM_001055709 | Murc    | 313225 |
| 4.1875706 | up | NM_001025645 | Mus81   | 293678 |
| 11.897574 | up | NM_031061    | Musk    | 81725  |
| 92.477875 | up | NM_181368    | Mustn1  | 290553 |
| 41.563286 | up | XM_001067239 | Mut     | 688517 |
| 2.700352  | up | XM_001063623 | Muted   | 306868 |
| 4.279303  | up | NM_031063    | Mvk     | 81727  |
| 21.127583 | up | NM_022715    | Mvp     | 64681  |
| 6.913128  | up | NM_173096    | Mx1     | 24575  |
| 9.2201    | up | NM_013160    | Mxi1    | 25701  |
| 3.9570231 | up | NM_001007002 | Mxra8   | 313770 |
| 4.578991  | up | NM_183332    | Myadm   | 369016 |
| 6.03351   | up | XM_001081809 | Myadml2 | 303744 |
| 10.574317 | up | NM_031668    | Mybbp1a | 60571  |
| 361.7119  | up | XM_001076591 | Mybpc1  | 362867 |
| 229.47992 | up | XM_001077870 | Mybpc2  | 292879 |
| 261.19235 | up | NM_031813    | Mybph   | 83708  |
| 2.0797853 | up | NM_012603    | Myc     | 24577  |
| 2.430682  | up | NM_198130    | Myd88   | 301059 |
| 6.847363  | up | XM_001080763 | Myf5    | 299766 |
| 74.1583   | up | NM_013172    | Myf6    | 25714  |

|           |    |              |         |        |
|-----------|----|--------------|---------|--------|
| 10.2199   | up | XM_001053402 | Myh11   | 24582  |
| 10.823364 | up | XM_001080622 | Myh14   | 308572 |
| 32.899208 | up | XM_001077462 | Myh2    | 691644 |
| 10.992496 | up | NM_012604    | Myh3    | 24583  |
| 409.4073  | up | NM_019325    | Myh4    | 360543 |
| 14.911905 | up | NM_017240    | Myh7    | 29557  |
| 5.525319  | up | XM_001078049 | Myh8    | 252942 |
| 9.53442   | up | NM_013194    | Myh9    | 25745  |
| 162.43965 | up | NM_001077656 | My11    | 56781  |
| 53.220585 | up | NM_017343    | My112b  | 50685  |
| 52.97088  | up | NM_012606    | My13    | 24585  |
| 7.6028905 | up | XM_001065562 | My16    | 685867 |
| 3.4523463 | up | XM_001067182 | My19    | 296313 |
| 16.863203 | up | NM_057209    | My1k2   | 117558 |
| 252.91457 | up | NM_012605    | My1pf   | 24584  |
| 2.154738  | up | NM_001012178 | My1nn   | 361924 |
| 4.906358  | up | XM_239684    | Myo18b  | 304551 |
| 12.380071 | up | NM_023092    | Myo1c   | 65261  |
| 3.2174034 | up | NM_173101    | Myo1e   | 25484  |
| 5.2548933 | up | NM_030865    | Myoc    | 81523  |
| 15.682365 | up | NM_176079    | Myod1   | 337868 |
| 191.53506 | up | NM_017115    | Myog    | 29148  |
| 23.182    | up | XM_001054913 | Myom1   | 316740 |
| 11.339727 | up | XM_001074764 | Myom2   | 306616 |
| 249.31203 | up | XM_001053135 | Myot    | 291605 |
| 34.869846 | up | XM_001064588 | Myoz1   | 498440 |
| 9.874626  | up | XM_001075328 | Myoz2   | 295426 |
| 8.011902  | up | XM_001080508 | My1pn   | 309760 |
| 4.811894  | up | NM_181081    | My1st2  | 303470 |
| 2.0505836 | up | XM_001068071 | N4bp1   | 291921 |
| 8.745368  | up | NM_001005533 | N4bp212 | 288416 |
| 3.0015845 | up | XM_001063156 | N6amt2  | 290279 |
| 11.51829  | up | NM_001047900 | Naa25   | 360811 |
| 3.2727892 | up | NM_001010967 | Naaa    | 497009 |
| 10.683833 | up | XM_001065645 | Naca    | 288770 |
| 3.1785164 | up | XM_001058289 | Nacc2   | 296583 |
| 2.595293  | up | NM_181480    | Nadsyn1 | 353255 |
| 4.2278733 | up | NM_001012120 | Naga    | 315165 |
| 2.4960945 | up | NM_001009409 | Nanp    | 311530 |
| 5.8434744 | up | NM_053561    | Nap111  | 89825  |
| 4.508503  | up | NM_001012170 | Nap114  | 361684 |
| 4.656543  | up | XM_001063511 | Napg    | 307382 |
| 5.0790567 | up | NM_001039207 | Narf    | 360681 |
| 3.3369005 | up | NM_001034921 | Nars2   | 293128 |

|            |    |              |            |        |
|------------|----|--------------|------------|--------|
| 3.037576   | up | XM_001067534 | Nat13      | 288108 |
| 8.308142   | up | XM_001054968 | Nat5       | 362228 |
| 2.4363306  | up | XM_001081673 | Nat9       | 303669 |
| 2.3424788  | up | XM_001077277 | Nbeal2     | 316014 |
| 4.08764    | up | NM_031609    | Nbl1       | 50594  |
| 3.4939356  | up | NM_138873    | Nbn        | 85482  |
| 6.687228   | up | NM_001024765 | Nbr1       | 303554 |
| 75.28583   | up | NM_031521    | Ncam1      | 24586  |
| 2.846361   | up | NM_001034000 | Ncapd3     | 315508 |
| 5.011656   | up | NM_001024877 | Ncaph2     | 300149 |
| 6.9137354  | up | NM_001014785 | Ncbp1      | 298075 |
| 2.655748   | up | XM_001074363 | Ncf4       | 500904 |
| 6.0195074  | up | XM_001066601 | Nck1       | 300955 |
| 6.060051   | up | NM_012749    | Ncl        | 25135  |
| 27.948454  | up | XM_001070473 | Ncoa1      | 313929 |
| 3.2932847  | up | NM_001034007 | Ncoa4      | 619385 |
| 7.9252157  | up | XM_001064071 | Ncoa6      | 116464 |
| 30.982262  | up | XM_001077447 | Ncor1      | 54299  |
| 9.593741   | up | XM_001074041 | Ncor2      | 360801 |
| 2.5160458  | up | XM_001065306 | Ncrna00117 | 289864 |
| 8.719893   | up | NM_174864    | Ncstn      | 289231 |
| 12.193109  | up | NM_053347    | Nde1       | 83836  |
| 3.264119   | up | NM_133320    | Ndel1      | 170845 |
| 24.760445  | up | NM_001013059 | Ndfip1     | 291609 |
| 11.2915745 | up | XM_001077197 | Ndfip2     | 361089 |
| 4.256451   | up | XM_219708    | Ndn12      | 309259 |
| 412.76273  | up | NM_133583    | Ndrg2      | 171114 |
| 3.4384522  | up | XM_001067405 | Ndrg3      | 296318 |
| 9.01717    | up | XM_001064811 | Ndst2      | 114002 |
| 25.128368  | up | XM_343760    | Ndufa1     | 363441 |
| 5.3091702  | up | NM_182671    | Ndufa1011  | 316632 |
| 8.743108   | up | NM_212517    | Ndufa11    | 301123 |
| 36.676125  | up | XM_001080378 | Ndufa12    | 299739 |
| 3.5177324  | up | XM_001080448 | Ndufa13    | 314759 |
| 4.514643   | up | XM_001077432 | Ndufa6     | 315167 |
| 3.5212128  | up | XM_001079223 | Ndufa7     | 299643 |
| 5.2837205  | up | XM_215814    | Ndufaf1    | 296086 |
| 4.818416   | up | XM_001073799 | Ndufaf2    | 361894 |
| 30.216166  | up | NM_001033971 | Ndufaf3    | 56769  |
| 74.97265   | up | XM_001054860 | Ndufb11    | 299310 |
| 3.0563135  | up | XM_001070173 | Ndufb2     | 362344 |
| 4.677583   | up | XM_001068986 | Ndufb3     | 301427 |
| 2.4938185  | up | NM_001037338 | Ndufb4     | 288088 |
| 45.36555   | up | XM_001066565 | Ndufb5     | 294964 |

|           |    |              |            |        |
|-----------|----|--------------|------------|--------|
| 23.783222 | up | XM_001062275 | Ndufb8     | 293991 |
| 65.876274 | up | NM_001009290 | Ndufc2     | 293130 |
| 86.089584 | up | NM_001005550 | Ndufs1     | 301458 |
| 65.24364  | up | NM_001011907 | Ndufs2     | 289218 |
| 44.501747 | up | XM_001077876 | Ndufs3     | 295923 |
| 2.7008214 | up | NM_001025146 | Ndufs4     | 499529 |
| 4.654201  | up | NM_001030052 | Ndufs5     | 362588 |
| 65.56391  | up | NM_019223    | Ndufs6     | 29478  |
| 28.405216 | up | NM_001008525 | Ndufs7     | 362837 |
| 15.161438 | up | XM_001069669 | Ndufs8     | 293652 |
| 16.537699 | up | XM_001061260 | Ndufv3-ps1 | 685005 |
| 677.10974 | up | XM_001056398 | Neb        | 311029 |
| 2.577945  | up | XM_001080224 | Nedd1      | 299730 |
| 266.81503 | up | XM_001053672 | Nedd4      | 25489  |
| 2.6293676 | up | XM_001064485 | Nedd4l     | 291553 |
| 84.598305 | up | NM_138878    | Nedd8      | 25490  |
| 3.4233205 | up | NM_001011922 | Nedd9      | 291044 |
| 2.0519722 | up | XM_001065115 | Nek3       | 306576 |
| 3.906327  | up | XM_001060008 | Nek4       | 306252 |
| 7.729229  | up | XM_001066105 | Nek7       | 360850 |
| 5.667497  | up | XM_001057566 | Nek9       | 299204 |
| 2.900222  | up | NM_001002851 | Nenf       | 289380 |
| 6.942471  | up | XM_001074913 | Neo1       | 81735  |
| 4.17516   | up | XM_230848    | Neurl2     | 311633 |
| 11.453672 | up | XM_001079248 | Neurl4     | 303248 |
| 26.380331 | up | NM_139230    | Nexn       | 246172 |
| 3.186713  | up | XM_001067432 | Nf2        | 25744  |
| 20.375607 | up | NM_031789    | Nfe2l2     | 83619  |
| 3.3714938 | up | NM_012988    | Nfia       | 25492  |
| 16.301085 | up | XM_001059586 | Nfib       | 29227  |
| 2.0231395 | up | NM_053727    | Nfil3      | 114519 |
| 51.60423  | up | NM_030866    | Nfix       | 81524  |
| 2.6049595 | up | XM_001075876 | Nfkb1      | 81736  |
| 6.577172  | up | XM_001075778 | Nfkbia     | 25493  |
| 31.999027 | up | NM_030867    | Nfkbib     | 81525  |
| 3.1890922 | up | NM_199111    | Nfkbie     | 316241 |
| 2.4446664 | up | XM_001056399 | Nfrkb      | 315523 |
| 26.313166 | up | NM_053462    | Nfs1       | 84594  |
| 21.311672 | up | XM_001070447 | Nfu1       | 297416 |
| 8.107326  | up | XM_001059410 | Nfx1       | 313166 |
| 7.262578  | up | XM_001057531 | Ngdn       | 305887 |
| 11.42984  | up | NM_001014136 | Ngly1      | 361014 |
| 2.079654  | up | NM_001014217 | Nhej1      | 363251 |
| 2.4396892 | up | NM_199236    | Nhlrc1     | 364682 |

|           |    |              |          |        |
|-----------|----|--------------|----------|--------|
| 9.906994  | up | XM_001071992 | Nhp2     | 287273 |
| 7.1180234 | up | XM_001054079 | Nid1     | 25494  |
| 4.146913  | up | NM_173126    | Nid67    | 286910 |
| 3.709716  | up | NM_001024763 | Nif311   | 301431 |
| 47.67306  | up | NM_012867    | Ninj1    | 25338  |
| 12.047258 | up | NM_001014014 | Nip30    | 307652 |
| 2.1304185 | up | NM_138847    | Nip7     | 192180 |
| 2.4609141 | up | XM_001054428 | Nipa2    | 308667 |
| 7.477601  | up | XM_001058806 | Nipal2   | 362899 |
| 7.1730704 | up | XM_238213    | Nipbl    | 294787 |
| 5.225697  | up | XM_001057307 | Nisch    | 306255 |
| 45.65796  | up | NM_001082580 | Nit1     | 289222 |
| 3.8284652 | up | XM_001062503 | Nkain1   | 500557 |
| 5.2631655 | up | NM_001024872 | Nkap     | 298342 |
| 9.486408  | up | XM_001067083 | Nmd3     | 310512 |
| 11.692296 | up | NM_031833    | Nme2     | 83782  |
| 15.943083 | up | XM_001074672 | Nme2-ps1 | 690520 |
| 12.751929 | up | XM_001076342 | Nme6     | 58964  |
| 10.328197 | up | NM_138532    | Nme7     | 171566 |
| 5.4752893 | up | NM_001037556 | Nmnat1   | 298653 |
| 6.414227  | up | NM_001013224 | Nmnat3   | 363118 |
| 3.3912115 | up | XM_001079214 | Nmral1   | 287063 |
| 2.2839518 | up | NM_053601    | Nnat     | 94270  |
| 3.365138  | up | NM_199086    | Nob1     | 291996 |
| 8.444229  | up | NM_001033897 | Noc2l    | 313777 |
| 3.2204442 | up | XM_001080301 | Noc3l    | 361753 |
| 2.773525  | up | NM_001014129 | Noc4l    | 360828 |
| 33.530384 | up | NM_001012747 | Nol12    | 362955 |
| 21.861576 | up | NM_053516    | Nol3     | 85383  |
| 5.0797973 | up | XM_573999    | Nol7     | 498727 |
| 14.956784 | up | NM_022869    | Nolc1    | 64896  |
| 2.082033  | up | XM_001078710 | Nop10    | 691534 |
| 14.340026 | up | XM_001058941 | Nop14    | 289724 |
| 4.792807  | up | NM_001047095 | Nop16    | 306768 |
| 10.269125 | up | XM_001065060 | Nop2     | 314969 |
| 32.699142 | up | NM_001025732 | Nop56    | 362214 |
| 4.6742806 | up | NM_021754    | Nop58    | 60373  |
| 3.7676933 | up | NM_021838    | Nos3     | 24600  |
| 2.253242  | up | XM_001078434 | Notch1   | 25496  |
| 2.9420977 | up | NM_030868    | Nov      | 81526  |
| 18.52961  | up | XM_001064625 | Np       | 290029 |
| 3.0796237 | up | NM_001007800 | N-pac    | 360477 |
| 2.0708277 | up | NM_012991    | Npap60   | 25497  |
| 2.5765572 | up | XM_001058630 | Npas2    | 316351 |



|           |    |              |         |        |
|-----------|----|--------------|---------|--------|
| 3.5149431 | up | XM_001072137 | Npat    | 315666 |
| 76.82881  | up | NM_173118    | Npc2    | 286898 |
| 2.1162863 | up | XM_001055241 | Npepl1  | 311671 |
| 3.093733  | up | XM_001078692 | Nphp1   | 296136 |
| 10.689682 | up | NM_080577    | Nploc4  | 140639 |
| 6.3109865 | up | NM_019380    | Nptn    | 56064  |
| 24.551434 | up | NM_017000    | Nqo1    | 24314  |
| 8.220399  | up | NM_145775    | Nr1d1   | 252917 |
| 7.1095686 | up | NM_147210    | Nr1d2   | 259241 |
| 19.888727 | up | NM_031626    | Nr1h2   | 58851  |
| 4.4170938 | up | NM_031627    | Nr1h3   | 58852  |
| 7.528135  | up | NM_145780    | Nr2c1   | 252924 |
| 2.3074286 | up | NM_017323    | Nr2c2   | 50659  |
| 3.3229208 | up | NM_080778    | Nr2f2   | 113984 |
| 30.785305 | up | NM_024388    | Nr4a1   | 79240  |
| 5.666746  | up | NM_080766    | Nras    | 24605  |
| 3.2420452 | up | NM_022186    | Nrbf2   | 58839  |
| 3.9521806 | up | NM_001034997 | Nrbp    | 619579 |
| 3.6422694 | up | XM_001056969 | Nrbp2   | 680451 |
| 70.76966  | up | NM_012993    | Nrd1    | 25499  |
| 2.2836127 | up | XM_001067591 | Nrip1   | 304157 |
| 4.268539  | up | NM_145098    | Nrp1    | 246331 |
| 2.21295   | up | NM_021767    | Nrxn1   | 60391  |
| 7.31785   | up | NM_207607    | Ns5atp4 | 311934 |
| 7.2026076 | up | NM_001009399 | Nsdhl   | 309262 |
| 4.3583546 | up | NM_021748    | Nsf     | 60355  |
| 212.61809 | up | NM_031981    | Nsfl1c  | 83809  |
| 2.9997509 | up | NM_001034152 | Nsg2    | 497878 |
| 5.7936172 | up | NM_181389    | Nsmaf   | 353233 |
| 22.660257 | up | NM_001039611 | Nsmce1  | 361645 |
| 2.6623049 | up | NM_001024876 | Nsmce2  | 299957 |
| 6.2106743 | up | XM_001080533 | Nsmce4a | 293528 |
| 15.397447 | up | XM_001057743 | Nsun2   | 361191 |
| 4.4129596 | up | XM_001070636 | Nsun4   | 298426 |
| 2.993689  | up | XM_231803    | Nt5c3   | 312373 |
| 2.0190454 | up | NM_021576    | Nt5e    | 58813  |
| 2.5306735 | up | NM_031073    | Ntf3    | 81737  |
| 37.57083  | up | NM_001011891 | Nubp2   | 287125 |
| 7.7447567 | up | NM_053463    | Nucb1   | 84595  |
| 3.4002733 | up | NM_021663    | Nucb2   | 59295  |
| 3.6506336 | up | NM_017271    | Nudc    | 29648  |
| 3.9704452 | up | NM_057120    | Nudt1   | 117260 |
| 3.6418228 | up | XM_001071036 | Nudt12  | 367323 |
| 3.1023774 | up | XM_001073187 | Nudt14  | 299346 |

|            |    |              |          |        |
|------------|----|--------------|----------|--------|
| 6.8740296  | up | XM_001076872 | Nudt1611 | 497867 |
| 8.999288   | up | XM_001071041 | Nudt18   | 361068 |
| 3.843784   | up | NM_001004258 | Nudt19   | 308518 |
| 18.314632  | up | NM_207596    | Nudt2    | 297998 |
| 26.134003  | up | NM_001039004 | Nudt21   | 291877 |
| 102.63899  | up | NM_001024243 | Nudt3    | 294292 |
| 34.777534  | up | NM_053598    | Nudt4    | 94267  |
| 2.587882   | up | NM_181363    | Nudt6    | 207120 |
| 5.0932198  | up | XM_001076428 | Nudt7    | 361413 |
| 30.760061  | up | XM_341975    | Nudt8    | 361692 |
| 6.6163435  | up | NM_001006991 | Nudt9    | 305149 |
| 3.0131865  | up | NM_001007758 | Nufip1   | 364430 |
| 10.025452  | up | XM_001068048 | Numa1    | 308870 |
| 4.588616   | up | NM_133287    | Numb     | 29419  |
| 6.7306275  | up | NM_053830    | Nup107   | 116555 |
| 2.8949919  | up | XM_001053507 | Nup133   | 292085 |
| 8.644666   | up | NM_053952    | Nup155   | 117021 |
| 6.367608   | up | XM_001065232 | Nup205   | 362335 |
| 11.000666  | up | NM_001004229 | Nup35    | 295692 |
| 4.5089393  | up | XM_001076503 | Nup37    | 299706 |
| 5.8087187  | up | NM_017361    | Nup54    | 53372  |
| 3.7662365  | up | NM_023098    | Nup62    | 65274  |
| 8.61896    | up | NM_053616    | Nup88    | 113929 |
| 8.778071   | up | NM_001011925 | Nup93    | 291874 |
| 11.487658  | up | XM_001068834 | Nup98    | 81738  |
| 2.4396472  | up | XM_001058252 | Nus1     | 294400 |
| 43.18366   | up | NM_001007629 | Nutf2    | 291981 |
| 7.213226   | up | XM_001062403 | Nvl      | 289323 |
| 7.3212614  | up | NM_021579    | Nxf1     | 59087  |
| 2.1943402  | up | XM_340857    | Nxn      | 360577 |
| 14.013597  | up | XM_001057228 | Nxt1     | 296219 |
| 5.3518486  | up | NM_001014090 | Oaf      | 315594 |
| 2.1337447  | up | NM_144752    | Oas1b    | 246268 |
| 12.442205  | up | NM_022521    | Oat      | 64313  |
| 209.80295  | up | NM_139081    | Oaz1     | 25502  |
| 2.2456295  | up | NM_001011943 | Obfc1    | 294025 |
| 13.899736  | up | NM_001034939 | Obfc2b   | 362813 |
| 36.627556  | up | XM_001076876 | Obscn    | 338458 |
| 102.319855 | up | XM_001075143 | Obscnl   | 287353 |
| 54.914772  | up | NM_001013874 | Ociad1   | 289590 |
| 17.567495  | up | NM_012615    | Odc1     | 24609  |
| 4.301995   | up | NM_017213    | Odf2     | 29479  |
| 3.2024336  | up | XM_001066370 | Ofd1     | 302661 |
| 3.9195302  | up | NM_053340    | Ogfr     | 83525  |

|           |    |              |         |        |
|-----------|----|--------------|---------|--------|
| 6.754073  | up | NM_001025708 | Ogfrl1  | 316290 |
| 2.2737203 | up | NM_030870    | Ogg1    | 81528  |
| 8.782576  | up | XM_001054599 | Ogn     | 291015 |
| 19.24362  | up | NM_017107    | Ogt     | 26295  |
| 16.043894 | up | NM_001033927 | Ola1    | 296488 |
| 2.7474046 | up | XM_001072555 | Olfml2b | 304960 |
| 6.142837  | up | XM_001064747 | Olfml3  | 310743 |
| 4.723069  | up | XM_001063646 | Oma1    | 298282 |
| 17.056467 | up | NM_133585    | Opa1    | 171116 |
| 2.7706444 | up | NM_145081    | Optn    | 246294 |
| 16.630531 | up | NM_001013982 | Orai1   | 304496 |
| 3.9821458 | up | NM_001012003 | Orc2l   | 301430 |
| 4.0738473 | up | NM_001025282 | Orc3l   | 313138 |
| 3.0662727 | up | NM_001047897 | Ormdl3  | 360618 |
| 5.8747725 | up | XM_001065111 | Osbpl1l | 303888 |
| 6.2779098 | up | NM_172023    | Osbpl1a | 259221 |
| 4.620732  | up | NM_001013079 | Osbpl2  | 296461 |
| 2.1752884 | up | XM_001065853 | Osbpl5  | 361686 |
| 3.2640133 | up | XM_001062227 | Osbpl6  | 311129 |
| 6.3090363 | up | NM_001029923 | Oscp1   | 362595 |
| 5.780026  | up | XM_001064067 | Osgep   | 290028 |
| 5.1051893 | up | NM_001024787 | Osgep1l | 314548 |
| 5.736968  | up | XM_001056612 | Osgin2  | 313085 |
| 5.2272034 | up | NM_001005384 | Osmr    | 310132 |
| 4.724791  | up | XM_001072940 | Ostalpa | 303879 |
| 13.391132 | up | NM_001029925 | Ostm1   | 499474 |
| 4.079171  | up | NM_207612    | Ostn    | 360730 |
| 2.1087923 | up | XM_001072480 | Otub1   | 293705 |
| 2.048035  | up | XM_001074167 | Otud1   | 498803 |
| 5.4903793 | up | NM_001037496 | Otud5   | 363452 |
| 4.3297896 | up | XM_001058882 | Otud7b  | 310677 |
| 16.046116 | up | XM_001080669 | Ovca2   | 497954 |
| 4.607409  | up | XM_001061616 | Oxr1    | 117520 |
| 4.57328   | up | XM_001062014 | Oxsm    | 289934 |
| 3.6139753 | up | XM_001078098 | Oxsr1   | 316064 |
| 80.07015  | up | NM_199102    | p18     | 308869 |
| 6.559199  | up | NM_031594    | P2rx4   | 29659  |
| 3.2336187 | up | NM_080780    | P2rx5   | 113995 |
| 5.472145  | up | NM_012800    | P2ry1   | 25265  |
| 3.7342248 | up | NM_133577    | P2ry14  | 171108 |
| 7.2074847 | up | NM_017255    | P2ry2   | 29597  |
| 11.918135 | up | NM_172062    | P4ha1   | 64475  |
| 64.859566 | up | NM_012998    | P4hb    | 25506  |
| 3.214694  | up | XM_001075237 | P4htm   | 301008 |

|           |    |              |          |        |
|-----------|----|--------------|----------|--------|
| 139.97792 | up | XM_001054606 | Pabpc4   | 298510 |
| 28.912758 | up | XM_001055786 | Pabpn1   | 116697 |
| 8.954382  | up | NM_130740    | Pacsin2  | 124461 |
| 91.93929  | up | NM_001009966 | Pacsin3  | 311187 |
| 3.9636374 | up | NM_001024898 | Paf1     | 361531 |
| 14.158799 | up | NM_031763    | Pafah1b1 | 83572  |
| 7.819241  | up | NM_080910    | Paics    | 140946 |
| 14.666125 | up | XM_001068994 | Paip1    | 365684 |
| 14.353208 | up | NM_001014148 | Paip2    | 361309 |
| 18.382032 | up | XM_001079699 | Paip211  | 293469 |
| 2.9170506 | up | NM_017198    | Pak1     | 29431  |
| 2.8655615 | up | NM_001037356 | Pak1ip1  | 361232 |
| 7.4785576 | up | NM_053306    | Pak2     | 29432  |
| 6.235717  | up | NM_001025688 | Palmd    | 310811 |
| 44.642937 | up | NM_013000    | Pam      | 25508  |
| 3.235802  | up | NM_001008862 | Pan2     | 408200 |
| 2.499064  | up | XM_001068449 | Pan3     | 360760 |
| 7.4214926 | up | XM_001081198 | Pank2    | 296167 |
| 17.696602 | up | NM_133531    | Pank4    | 171053 |
| 2.5838377 | up | NM_199397    | Panx1    | 315435 |
| 3.9129987 | up | NM_001008372 | Papd4    | 361878 |
| 3.30368   | up | XM_001066974 | Papd5    | 307745 |
| 9.86043   | up | XM_001069715 | Papola   | 314417 |
| 4.5331545 | up | XM_001057482 | Papolg   | 305586 |
| 9.842098  | up | NM_001012033 | Paqr3    | 305203 |
| 2.4026866 | up | XM_001066763 | Pard3b   | 301455 |
| 5.9911494 | up | NM_031339    | Parg     | 83507  |
| 536.4663  | up | NM_057143    | Park7    | 117287 |
| 35.91057  | up | NM_001035249 | Parl     | 287979 |
| 4.2801304 | up | NM_173114    | Parm1    | 286894 |
| 2.8931477 | up | XM_001075629 | Parn     | 360464 |
| 11.061948 | up | NM_013063    | Parp1    | 25591  |
| 2.5031302 | up | XM_001067057 | Parp12   | 362343 |
| 2.4657016 | up | XM_001071334 | Parp14   | 303903 |
| 8.921959  | up | XM_001063825 | Parp2    | 290027 |
| 29.440325 | up | NM_001008328 | Parp3    | 300985 |
| 2.71586   | up | XM_001059899 | Parp4    | 361046 |
| 11.722443 | up | XM_001073042 | Parp6    | 300759 |
| 7.904748  | up | XM_001071222 | Parp9    | 303905 |
| 8.697353  | up | NM_020656    | Parva    | 57341  |
| 3.8256698 | up | XM_001059112 | Pbrm1    | 306254 |
| 4.7971687 | up | XM_001072172 | Pbx1     | 304947 |
| 2.3812175 | up | NM_001002828 | Pbx2     | 406164 |
| 3.8710897 | up | XM_001073314 | Pbxip1   | 310644 |

|           |    |              |         |        |
|-----------|----|--------------|---------|--------|
| 10.355905 | up | NM_001024252 | Pcaf    | 301164 |
| 3.2650685 | up | NM_001007601 | Pcbd1   | 29700  |
| 103.37837 | up | XM_575592    | Pcbp1   | 500242 |
| 4.605072  | up | NM_001011945 | Pcbp3   | 294336 |
| 3.924146  | up | XM_001075496 | Pcca    | 687008 |
| 4.172645  | up | XM_001067802 | Pcdh19  | 317183 |
| 3.528092  | up | NM_001012215 | Pcdhgb7 | 364844 |
| 2.2445886 | up | XM_001062815 | Pcf11   | 361605 |
| 3.4394934 | up | NM_001007000 | Pcgf1   | 312480 |
| 2.2950757 | up | XM_001081335 | Pcgf2   | 287662 |
| 9.045404  | up | XM_001060303 | Pcgf3   | 305624 |
| 6.541794  | up | XM_001060464 | Pcgf5   | 681178 |
| 3.1873512 | up | XM_001070779 | Pcif1   | 362269 |
| 53.0761   | up | NM_013073    | Pcmt1   | 25604  |
| 7.1427503 | up | XM_001056609 | Pcmt2   | 311726 |
| 11.699868 | up | NM_022381    | Pcna    | 25737  |
| 5.6622043 | up | NM_001047846 | Pcnp    | 288165 |
| 4.8807335 | up | XM_001055794 | Pcnx    | 314288 |
| 6.8480825 | up | NM_019237    | Pcolce  | 29569  |
| 5.520949  | up | XM_001068680 | PCOLCE2 | 684050 |
| 44.765087 | up | NM_001004132 | Pctk1   | 81741  |
| 5.574146  | up | NM_017225    | Pctp    | 29510  |
| 5.911279  | up | NM_145085    | Pcyox1  | 246302 |
| 4.1330776 | up | NM_053568    | Pcyt2   | 89841  |
| 4.621034  | up | NM_022595    | Pdap1   | 64527  |
| 3.7039895 | up | XM_001069234 | Pdcd11  | 309458 |
| 6.09914   | up | XM_001056283 | Pdcd2   | 58934  |
| 6.05772   | up | XM_001073061 | Pdcd2l  | 689637 |
| 15.920541 | up | NM_022265    | Pdcd4   | 64031  |
| 10.95282  | up | XM_001079809 | Pdcd5   | 292814 |
| 9.517003  | up | XM_001056202 | Pdcd6   | 308061 |
| 79.57626  | up | XM_001076624 | Pdcd6ip | 501083 |
| 5.265527  | up | XM_001076457 | Pdcd7   | 363082 |
| 10.738302 | up | NM_001025709 | Pdcl3   | 316348 |
| 2.3149223 | up | XM_001062531 | Pdde1   | 309110 |
| 2.2502933 | up | NM_022236    | Pde10a  | 63885  |
| 2.2183852 | up | NM_001013998 | Pde12   | 306231 |
| 2.399674  | up | NM_031079    | Pde2a   | 81743  |
| 9.947249  | up | NM_017031    | Pde4b   | 24626  |
| 7.2580953 | up | NM_017032    | Pde4d   | 24627  |
| 4.4101105 | up | XM_001066038 | Pde6d   | 363272 |
| 7.8826365 | up | XM_001053781 | Pde7a   | 81744  |
| 2.3551965 | up | NM_198767    | Pde8a   | 308776 |
| 2.811465  | up | NM_031317    | Pdgfc   | 79429  |

|            |    |              |        |        |
|------------|----|--------------|--------|--------|
| 2.6953006  | up | XM_001067574 | Pdgra  | 25267  |
| 11.683125  | up | NM_001004072 | Pdha1  | 29554  |
| 41.6373    | up | NM_001007620 | Pdha2  | 289950 |
| 9.658257   | up | NM_001044242 | Pdha3  | 311254 |
| 7.9532986  | up | NM_017319    | Pdia3  | 29468  |
| 49.40983   | up | NM_001004442 | Pdia6  | 286906 |
| 3.7934752  | up | XM_001068002 | Pdik11 | 313609 |
| 82.39736   | up | NM_030872    | Pdk2   | 81530  |
| 47.967022  | up | NM_053551    | Pdk4   | 89813  |
| 26.654217  | up | NM_017365    | Pdlim1 | 54133  |
| 533.8848   | up | NM_053650    | Pdlim3 | 114108 |
| 23.120157  | up | NM_019372    | Pdp1   | 54705  |
| 2.9529114  | up | NM_145091    | Pdp2   | 246311 |
| 16.108614  | up | NM_031081    | Pdpc1  | 81745  |
| 3.7438853  | up | NM_019358    | Pdpcn  | 54320  |
| 2.9178789  | up | NM_001083624 | Pds5a  | 305343 |
| 3.4500809  | up | NM_001014249 | Pdss2  | 365592 |
| 2.948241   | up | XM_001077670 | Pdxdc1 | 304721 |
| 4.9881697  | up | XM_001059007 | Pdzd11 | 302422 |
| 50.510708  | up | XM_001075473 | Pdzrn3 | 312607 |
| 2.6027734  | up | NM_001013231 | Pea15a | 364052 |
| 10.18686   | up | NM_017236    | Pebp1  | 29542  |
| 19.74843   | up | NM_031591    | Pecam1 | 29583  |
| 8.171182   | up | NM_001006966 | Peci   | 291075 |
| 9.121919   | up | NM_133299    | Pecr   | 113956 |
| 22.077717  | up | NM_001007634 | Pelo   | 294754 |
| 7.5329313  | up | NM_001024270 | Pelp1  | 360552 |
| 7.229972   | up | NM_001009641 | Pepd   | 292808 |
| 3.6044786  | up | NM_001044228 | Pes1   | 289740 |
| 13.837264  | up | NM_001025684 | Pex11b | 310682 |
| 4.417349   | up | NM_053921    | Pex12  | 116718 |
| 11.729124  | up | XM_001062825 | Pex13  | 305581 |
| 2.0595822  | up | NM_172063    | Pex14  | 64460  |
| 11.493354  | up | NM_001012088 | Pex16  | 311203 |
| 6.303892   | up | NM_031350    | Pex3   | 83519  |
| 3.082196   | up | XM_001062081 | Pex5   | 312703 |
| 2.7686176  | up | NM_001034147 | Pex7   | 308718 |
| 12.279897  | up | XM_001063625 | Pfdn1  | 361310 |
| 116.400826 | up | XM_001067687 | Pfdn5  | 300257 |
| 38.749695  | up | NM_212506    | Pfdn6  | 309629 |
| 4.8288717  | up | NM_012621    | Pfkfb1 | 24638  |
| 2.994083   | up | NM_057135    | Pfkfb3 | 117276 |
| 6.6233497  | up | NM_013190    | Pfkl   | 25741  |
| 89.04003   | up | NM_031715    | Pfkm   | 65152  |

|           |    |              |          |        |
|-----------|----|--------------|----------|--------|
| 2.9896598 | up | NM_206847    | Pfkp     | 60416  |
| 40.98519  | up | NM_022511    | Pfn1     | 64303  |
| 26.74488  | up | NM_030873    | Pfn2     | 81531  |
| 342.00043 | up | NM_017328    | Pgam2    | 24959  |
| 10.21292  | up | NM_053895    | Pgap2    | 116675 |
| 2.2342691 | up | NM_031082    | Pggt1b   | 81746  |
| 9.487262  | up | NM_053291    | Pgk1     | 24644  |
| 203.94774 | up | NM_017033    | Pgm1     | 24645  |
| 2.693239  | up | XM_001078446 | Pgm2     | 289632 |
| 5.072152  | up | XM_001062178 | Pgm211   | 685076 |
| 5.3254757 | up | XM_001055264 | Pgp      | 287115 |
| 6.5056105 | up | NM_201988    | Pgpep1   | 290648 |
| 23.46934  | up | NM_001008374 | Pgrmc2   | 361940 |
| 2.1591659 | up | XM_001081747 | Pgs1     | 303698 |
| 4.3716273 | up | NM_173133    | Phax     | 286917 |
| 13.219275 | up | XM_001053030 | Phb      | 25344  |
| 5.427076  | up | NM_001013035 | Phb2     | 114766 |
| 4.491783  | up | NM_001024747 | Phf10    | 292404 |
| 3.8700483 | up | NM_001024272 | Phf11    | 361051 |
| 2.4860957 | up | XM_001080701 | Phf12    | 303274 |
| 2.6586857 | up | XM_001067059 | Phf2011  | 314964 |
| 12.014235 | up | NM_138888    | Phf5a    | 192246 |
| 7.6873064 | up | NM_001012211 | Phf7     | 364510 |
| 43.403107 | up | NM_022626    | Phka1    | 64561  |
| 8.972014  | up | NM_001014152 | Phkb     | 361377 |
| 23.528841 | up | NM_031573    | Phkg1    | 29353  |
| 17.22673  | up | NM_080584    | Phkg2    | 140671 |
| 31.406847 | up | NM_001012206 | Phlda3   | 363989 |
| 2.9439712 | up | NM_021657    | Phlpp1   | 59265  |
| 8.240774  | up | NM_001007642 | Phospho2 | 295663 |
| 34.848335 | up | XM_001074086 | Phpt1    | 296571 |
| 3.761135  | up | XM_001065811 | Phtf1    | 252962 |
| 93.722    | up | NM_053674    | Phyh     | 114209 |
| 6.2051263 | up | NM_022301    | Pi4ka    | 64161  |
| 5.2364616 | up | NM_031083    | Pi4kb    | 81747  |
| 19.614622 | up | NM_053337    | Pias2    | 83422  |
| 2.8257585 | up | NM_031784    | Pias3    | 83614  |
| 7.6048937 | up | NM_053554    | Picalm   | 89816  |
| 3.0622349 | up | XM_001062621 | Pid1     | 501174 |
| 2.2384505 | up | XM_001078440 | Pigh     | 362756 |
| 19.724047 | up | NM_001011953 | Pigk     | 295543 |
| 11.012995 | up | XM_001055025 | Pigp     | 288238 |
| 4.247241  | up | NM_001006602 | Pigs     | 303277 |
| 20.646599 | up | XM_001070371 | Pigt     | 296360 |

|           |    |              |         |        |
|-----------|----|--------------|---------|--------|
| 6.2335157 | up | NM_181637    | Pigu    | 353304 |
| 3.153062  | up | NM_001010966 | Pigv    | 366478 |
| 23.596369 | up | NM_001024370 | Pigy    | 502782 |
| 8.88274   | up | XM_001064512 | Pigz    | 689116 |
| 2.2461069 | up | XM_001054196 | Pik3ap1 | 294048 |
| 11.277901 | up | NM_022958    | Pik3c3  | 65052  |
| 5.1041617 | up | NM_001017453 | Pik3ip1 | 305472 |
| 3.3561797 | up | NM_013005    | Pik3r1  | 25513  |
| 3.5549793 | up | NM_022185    | Pik3r2  | 29741  |
| 2.0125992 | up | XM_001072465 | Pikfyve | 316457 |
| 11.838696 | up | NM_022602    | Pim3    | 64534  |
| 4.502677  | up | NM_001083337 | Pinx1   | 305963 |
| 84.07685  | up | NM_017231    | Pitpna  | 29525  |
| 2.206652  | up | NM_053742    | Pitpnb  | 114561 |
| 5.872511  | up | XM_001067446 | Pitrm1  | 307081 |
| 2.6099467 | up | NM_001042505 | Pitx2   | 54284  |
| 2.5321176 | up | NM_138896    | Pja2    | 192256 |
| 4.8297224 | up | XM_001058532 | Pkd2    | 498328 |
| 3.8678284 | up | NM_053772    | Pkia    | 114906 |
| 4.5429907 | up | NM_153469    | Pkig    | 266709 |
| 138.45618 | up | NM_053297    | Pkm2    | 25630  |
| 5.731843  | up | NM_017175    | Pkn1    | 29355  |
| 2.3065958 | up | XM_001076809 | Pkn2    | 207122 |
| 21.700047 | up | XM_001058290 | Pkp4    | 295625 |
| 6.380023  | up | NM_138882    | Pla1a   | 85311  |
| 32.951126 | up | NM_017060    | Pla2g16 | 24913  |
| 2.4830253 | up | NM_001009353 | Pla2g7  | 301265 |
| 6.8335376 | up | NM_053866    | Plaa    | 116645 |
| 4.7973065 | up | NM_013151    | Plat    | 25692  |
| 12.397862 | up | NM_013085    | Plau    | 25619  |
| 2.3528895 | up | NM_017350    | Plaur   | 50692  |
| 13.994166 | up | NM_001013927 | Plbd1   | 297694 |
| 3.3964837 | up | NM_017035    | Plcd1   | 24655  |
| 10.771415 | up | NM_080688    | Plcd4   | 140693 |
| 2.3604615 | up | NM_013187    | Plcg1   | 25738  |
| 2.0688548 | up | NM_053456    | Plcl1   | 84587  |
| 15.203137 | up | XM_001056257 | Plcl2   | 301173 |
| 3.912268  | up | NM_001012167 | Pld3    | 361527 |
| 2.3797565 | up | XM_001072894 | Pld4    | 362792 |
| 2.3299181 | up | NM_001025714 | Pldn    | 317630 |
| 3.1063626 | up | NM_001079894 | Plekha1 | 361659 |
| 13.803106 | up | NM_001013077 | Plekha3 | 295674 |
| 2.8496442 | up | XM_001060789 | Plekha8 | 500132 |
| 3.1626978 | up | XM_001055776 | Plekha2 | 301337 |



|           |    |              |         |        |
|-----------|----|--------------|---------|--------|
| 2.274787  | up | XM_001072203 | Plekhf2 | 362484 |
| 3.0340552 | up | XM_234332    | Plekhh1 | 314262 |
| 12.411405 | up | XM_001071331 | Plekhj1 | 314634 |
| 4.993805  | up | XM_233611    | Plekhm2 | 313667 |
| 5.83472   | up | NM_031821    | Plk2    | 83722  |
| 3.1585526 | up | NM_053827    | Plod1   | 116552 |
| 3.6771882 | up | NM_178101    | Plod3   | 288583 |
| 2.6853158 | up | NM_207601    | Plp2    | 302562 |
| 15.57657  | up | NM_021757    | Plrg1   | 60376  |
| 2.7890587 | up | XM_001057425 | Pls3    | 81748  |
| 8.224359  | up | NM_001012139 | Plscr3  | 360549 |
| 17.418253 | up | XM_001072197 | Pltp    | 296371 |
| 6.08019   | up | XM_001054411 | Plxnd1  | 312652 |
| 2.502479  | up | XM_232864    | Pm20d2  | 313130 |
| 7.7423944 | up | NM_001008323 | Pmm1    | 300089 |
| 7.872719  | up | XM_001078730 | Pmm2    | 302915 |
| 2.3886714 | up | NM_017037    | Pmp22   | 24660  |
| 18.786888 | up | NM_001003673 | Pmpca   | 296588 |
| 3.0527902 | up | XM_001063043 | Pms2    | 288479 |
| 3.0003042 | up | NM_001008352 | Pmvk    | 310645 |
| 3.6424356 | up | NM_001004259 | Pnkp    | 308576 |
| 6.2012386 | up | XM_001079732 | Pnn     | 368070 |
| 6.554212  | up | NM_199083    | Pno1    | 289809 |
| 3.1675518 | up | XM_001062398 | Pnpla2  | 361676 |
| 5.943418  | up | XM_001059753 | Pnpla7  | 246246 |
| 11.670127 | up | XM_001078026 | Pnpla8  | 314075 |
| 2.0950444 | up | XM_001065076 | Pnpt1   | 360992 |
| 33.051006 | up | NM_173322    | Pnrc1   | 286988 |
| 2.1083636 | up | XM_001071803 | Pogk    | 304941 |
| 2.0616486 | up | XM_001078839 | Pol3s   | 499270 |
| 7.596608  | up | NM_017141    | Polb    | 29240  |
| 103.95235 | up | NM_001013050 | Pold2   | 289758 |
| 2.284271  | up | NM_001013195 | Pold4   | 361698 |
| 2.3848329 | up | XM_001080851 | Poldip2 | 287544 |
| 10.931186 | up | XM_001071977 | Pole4   | 362385 |
| 3.7752771 | up | NM_053528    | Polg    | 85472  |
| 2.57703   | up | XM_001060864 | Polk    | 171525 |
| 2.6648748 | up | NM_001014168 | Poll    | 361767 |
| 10.220308 | up | NM_031772    | Polr1a  | 83581  |
| 2.519237  | up | NM_001008330 | Polr1c  | 301246 |
| 7.874176  | up | XM_001065234 | Polr1e  | 313245 |
| 3.359577  | up | XM_001079162 | Polr2a  | 363633 |
| 35.335804 | up | XM_001075841 | Polr2b  | 289561 |
| 65.31514  | up | NM_001012473 | Polr2c  | 361365 |

|           |    |              |            |        |
|-----------|----|--------------|------------|--------|
| 38.145813 | up | XM_001076333 | Polr2e     | 690966 |
| 24.82216  | up | NM_031335    | Polr2f     | 83503  |
| 7.5479894 | up | NM_053948    | Polr2g     | 117017 |
| 3.4029334 | up | XM_001059014 | Polr2h     | 498109 |
| 3.7466025 | up | XM_001075773 | Polr2i     | 292778 |
| 32.047302 | up | XM_001077131 | Polr2j     | 288588 |
| 11.495562 | up | XM_577644    | Polr2l-ps1 | 502186 |
| 2.4909608 | up | XM_341388    | Polr3a     | 361102 |
| 4.3307858 | up | XM_343188    | Polr3b     | 362858 |
| 29.966738 | up | NM_001012081 | Polr3c     | 310685 |
| 2.8700204 | up | NM_001031653 | Polr3d     | 306012 |
| 10.013226 | up | XM_001077109 | Polr3h     | 300088 |
| 80.122246 | up | NM_001014259 | Polr3k     | 366277 |
| 2.4618986 | up | XM_001074109 | Polrmt     | 299604 |
| 2.8002148 | up | NM_001007747 | Pomgnt1    | 362567 |
| 20.131426 | up | XM_001060809 | Pomp       | 288455 |
| 9.973712  | up | NM_001013082 | Pon2       | 296851 |
| 7.4797564 | up | NM_001009642 | Pop4       | 292831 |
| 4.717315  | up | XM_001077549 | Pop5       | 117241 |
| 22.138636 | up | NM_199113    | Popdc2     | 360718 |
| 6.1535316 | up | NM_031576    | Por        | 29441  |
| 2.2282064 | up | XM_001055327 | Postn      | 361945 |
| 13.612225 | up | NM_172018    | Pp3111     | 246185 |
| 33.775352 | up | XM_001055932 | Ppa1       | 294504 |
| 3.8945568 | up | XM_001075518 | Ppa2       | 310856 |
| 68.94658  | up | NM_022538    | Ppap2a     | 64369  |
| 3.4818242 | up | NM_001034854 | Ppapdc2    | 619549 |
| 17.182375 | up | NM_001012349 | Ppapdc3    | 296635 |
| 3.7054896 | up | NM_031347    | Ppargc1a   | 83516  |
| 6.749706  | up | XM_001076038 | Ppat       | 117544 |
| 2.0311246 | up | NM_001039010 | Ppcs       | 298490 |
| 4.183166  | up | NM_001009316 | Ppdpf      | 296470 |
| 5.1177063 | up | XM_001061955 | Ppfia4     | 140592 |
| 7.413819  | up | XM_001074157 | Ppfibp1    | 312855 |
| 6.650876  | up | XM_001072553 | Ppfibp2    | 308918 |
| 39.127644 | up | NM_022536    | Ppib       | 64367  |
| 4.5052943 | up | NM_001004215 | Ppic       | 291463 |
| 3.3200402 | up | NM_001047868 | Ppie       | 298508 |
| 2.6077995 | up | NM_172243    | Ppif       | 282819 |
| 27.554516 | up | XM_001073803 | Ppih       | 366461 |
| 4.927789  | up | NM_175707    | Ppil3      | 301432 |
| 2.580336  | up | XM_001068646 | Ppil4      | 361449 |
| 2.0025578 | up | XM_001079075 | Ppl        | 302934 |
| 26.28189  | up | NM_033096    | Ppm1b      | 24667  |

|           |    |              |          |        |
|-----------|----|--------------|----------|--------|
| 3.9306338 | up | NM_147209    | Ppm1g    | 259229 |
| 3.1027927 | up | XM_001064332 | Ppm1k    | 312381 |
| 2.3683991 | up | XM_001054597 | Ppox     | 289219 |
| 96.61765  | up | NM_031527    | Ppp1ca   | 24668  |
| 48.212643 | up | NM_013065    | Ppp1cb   | 25594  |
| 19.750624 | up | NM_022498    | Ppp1cc   | 24669  |
| 2.651402  | up | NM_212542    | Ppp1r11  | 294207 |
| 2.5640361 | up | NM_053890    | Ppp1r12a | 116670 |
| 2.0916576 | up | XM_001062402 | Ppp1r12b | 304813 |
| 2.3768008 | up | XM_001071078 | Ppp1r12c | 499076 |
| 2.4124265 | up | XM_001072164 | Ppp1r13b | 314465 |
| 6.57835   | up | NM_172045    | Ppp1r14b | 259225 |
| 20.41623  | up | NM_133425    | Ppp1r14c | 171010 |
| 2.95014   | up | NM_133546    | Ppp1r15a | 171071 |
| 3.9086115 | up | XM_001073136 | Ppp1r16a | 362944 |
| 94.44224  | up | NM_022676    | Ppp1r1a  | 58977  |
| 9.254986  | up | NM_138823    | Ppp1r2   | 192361 |
| 20.572927 | up | XM_001057957 | Ppp1r3a  | 500036 |
| 69.3471   | up | NM_017039    | Ppp2ca   | 24672  |
| 14.072926 | up | NM_017040    | Ppp2cb   | 24673  |
| 137.3717  | up | NM_057140    | Ppp2r1a  | 117281 |
| 10.586339 | up | NM_053999    | Ppp2r2a  | 117104 |
| 3.9110823 | up | NM_144746    | Ppp2r2d  | 246255 |
| 7.91984   | up | XM_001059170 | Ppp2r3a  | 363122 |
| 2.662965  | up | XM_001077588 | Ppp2r4   | 362102 |
| 7.3243036 | up | XM_001066948 | Ppp2r5a  | 312754 |
| 27.766066 | up | NM_017041    | Ppp3ca   | 24674  |
| 6.240329  | up | NM_017042    | Ppp3cb   | 24675  |
| 4.353559  | up | NM_134367    | Ppp3cc   | 171378 |
| 2.9442914 | up | NM_017309    | Ppp3r1   | 29748  |
| 8.7255125 | up | NM_134359    | Ppp4c    | 171366 |
| 4.1165977 | up | NM_080907    | Ppp4r1   | 140943 |
| 3.3919613 | up | XM_001075424 | Ppp4r2   | 297486 |
| 13.120475 | up | NM_031729    | Ppp5c    | 65179  |
| 7.2118573 | up | NM_133589    | Ppp6c    | 171121 |
| 23.003633 | up | NM_001025703 | Pppde2   | 315160 |
| 8.66615   | up | XM_001079551 | Pptc7    | 304488 |
| 2.8887763 | up | XM_001056962 | Ppwd1    | 294711 |
| 2.3680117 | up | NM_001013957 | Pqbp1    | 302557 |
| 5.0645146 | up | NM_001012470 | Pqcp     | 314329 |
| 3.8521655 | up | XM_001071592 | Pqlc2    | 362642 |
| 3.5060472 | up | XM_346274    | Praf2    | 367743 |
| 16.818573 | up | XM_001068397 | Prcc     | 310687 |
| 3.7397373 | up | NM_001077648 | Prdm2    | 313678 |

|           |    |              |          |        |
|-----------|----|--------------|----------|--------|
| 6.682588  | up | NM_133312    | Prdm4    | 170820 |
| 25.482138 | up | NM_057114    | Prdx1    | 117254 |
| 56.25798  | up | NM_022540    | Prdx3    | 64371  |
| 33.07708  | up | NM_053610    | Prdx5    | 113898 |
| 15.900851 | up | NM_053576    | Prdx6    | 94167  |
| 4.320375  | up | NM_053385    | Prelp    | 84400  |
| 9.817559  | up | NM_031324    | Prep     | 83471  |
| 6.2958193 | up | NM_001010951 | Prepl    | 298771 |
| 2.0379858 | up | XM_230873    | Prex1    | 311647 |
| 2.7479358 | up | XM_001070215 | Prg4     | 289104 |
| 2.318122  | up | XM_001057421 | Prickle1 | 315259 |
| 16.149763 | up | NM_001014110 | Prickle3 | 317380 |
| 4.821674  | up | NM_001008768 | Prim1    | 246327 |
| 3.6467516 | up | NM_019142    | Prkaa1   | 65248  |
| 4.9365625 | up | NM_023991    | Prkaa2   | 78975  |
| 10.57085  | up | NM_031976    | Prkab1   | 83803  |
| 6.4771266 | up | NM_022627    | Prkab2   | 64562  |
| 5.144165  | up | XM_001072411 | Prkaca   | 25636  |
| 3.275616  | up | NM_001077645 | Prkacb   | 293508 |
| 8.880979  | up | NM_013010    | Prkag1   | 25520  |
| 49.53978  | up | NM_013181    | Prkar1a  | 25725  |
| 4.144189  | up | NM_019264    | Prkar2a  | 29699  |
| 2.272639  | up | NM_012713    | Prkcb    | 25023  |
| 6.2671356 | up | NM_134449    | Prkcdbp  | 85332  |
| 2.5156715 | up | NM_031085    | Prkch    | 81749  |
| 2.4111652 | up | XM_001064601 | Prkci    | 84006  |
| 2.7583365 | up | XM_001068336 | Prkdc    | 360748 |
| 5.7296724 | up | XM_001070562 | Prkrip1  | 498171 |
| 12.254499 | up | XM_001065056 | Prkrir   | 308845 |
| 5.0113926 | up | NM_024363    | Prmt1    | 60421  |
| 10.297601 | up | NM_053557    | Prmt3    | 89820  |
| 7.3822074 | up | NM_001014153 | Prmt7    | 361402 |
| 14.614828 | up | NM_012631    | Prnp     | 24686  |
| 3.4225116 | up | NM_021751    | Prom1    | 60357  |
| 12.900869 | up | XM_001061712 | Prosc    | 306544 |
| 13.708176 | up | XM_001057756 | Prpf3    | 361995 |
| 12.249923 | up | XM_001060413 | Prpf38a  | 298374 |
| 3.430217  | up | NM_001024305 | Prpf38b  | 499691 |
| 3.5467381 | up | XM_001076405 | Prpf39   | 314171 |
| 7.6715393 | up | NM_001011923 | Prpf4b   | 291078 |
| 11.927876 | up | NM_001079766 | Prpf6    | 366276 |
| 10.844889 | up | XM_001080695 | Prpf8    | 287530 |
| 10.36203  | up | NM_017243    | Prps1    | 29562  |
| 3.0109904 | up | NM_057131    | Prpsap2  | 117272 |

|           |    |              |         |        |
|-----------|----|--------------|---------|--------|
| 5.4817286 | up | NM_001008379 | Prr13   | 363004 |
| 6.9477944 | up | NM_001033887 | Prrc1   | 291444 |
| 10.880803 | up | XM_001079607 | Prrg4   | 499847 |
| 9.749646  | up | NM_153821    | Prrx1   | 266813 |
| 26.318367 | up | NM_001007691 | Prss23  | 308807 |
| 2.8973467 | up | XM_001069324 | Prtfdc1 | 291355 |
| 2.2293158 | up | NM_001007697 | Prune   | 310664 |
| 100.21211 | up | NM_001008764 | Psenen  | 292788 |
| 2.6552854 | up | NM_175765    | Psip1   | 313323 |
| 2.3053474 | up | XM_001076023 | Pskh1   | 364993 |
| 75.88768  | up | NM_017278    | Psma1   | 29668  |
| 14.045235 | up | NM_017279    | Psma2   | 29669  |
| 18.979301 | up | NM_001004094 | Psma3l  | 408248 |
| 56.34624  | up | NM_017281    | Psma4   | 29671  |
| 9.64192   | up | NM_017282    | Psma5   | 29672  |
| 16.075254 | up | NM_017283    | Psma6   | 29673  |
| 185.5157  | up | NM_001008217 | Psma7   | 29674  |
| 82.95448  | up | NM_053590    | Psmb1   | 94198  |
| 2.1540024 | up | NM_001025637 | Psmb10  | 291983 |
| 22.321667 | up | NM_017284    | Psmb2   | 29675  |
| 7.6520147 | up | NM_017285    | Psmb3   | 29676  |
| 39.87153  | up | NM_031629    | Psmb4   | 58854  |
| 53.888103 | up | XM_001054724 | Psmb5   | 29425  |
| 6.687931  | up | NM_057099    | Psmb6   | 29666  |
| 49.06833  | up | NM_053532    | Psmb7   | 85492  |
| 8.586286  | up | NM_080767    | Psmb8   | 24968  |
| 21.278395 | up | NM_057123    | Psmc1   | 117263 |
| 140.62166 | up | NM_033236    | Psmc2   | 25581  |
| 168.83217 | up | NM_031595    | Psmc3   | 29677  |
| 14.575166 | up | NM_057122    | Psmc4   | 117262 |
| 43.93096  | up | NM_031149    | Psmc5   | 81827  |
| 12.849072 | up | XM_001072705 | Psmc6   | 289990 |
| 133.33554 | up | NM_031978    | Psmd1   | 83806  |
| 12.686877 | up | XM_001080984 | Psmd11  | 303353 |
| 49.577454 | up | NM_001005875 | Psmd12  | 287772 |
| 49.464893 | up | XM_001058704 | Psmd13  | 365388 |
| 38.88284  | up | XM_001054967 | Psmd14  | 311078 |
| 71.00703  | up | NM_001008281 | Psmd3   | 287670 |
| 48.47081  | up | NM_031331    | Psmd4   | 83499  |
| 11.048213 | up | XM_001079109 | Psmd5   | 296651 |
| 2.982945  | up | XM_001076658 | Psmd7   | 307821 |
| 2.5986912 | up | XM_214888    | Psmd8   | 292766 |
| 14.99341  | up | NM_130430    | Psmd9   | 161475 |
| 10.996601 | up | NM_017264    | Psme1   | 29630  |

|           |    |              |         |        |
|-----------|----|--------------|---------|--------|
| 9.787389  | up | NM_001011894 | Psme3   | 287716 |
| 6.884491  | up | XM_001053403 | Psmg1   | 288236 |
| 2.9626806 | up | NM_001025672 | Pspc1   | 305910 |
| 2.683137  | up | XM_001070448 | Pstpip1 | 300732 |
| 23.6895   | up | XM_001056422 | Pstpip2 | 307248 |
| 2.6144536 | up | XM_001079960 | Ptar1   | 286972 |
| 2.7706516 | up | XM_001070504 | Ptcd2   | 310025 |
| 8.804662  | up | NM_001012113 | Ptdss1  | 314553 |
| 2.4844315 | up | XM_001062116 | Ptdss2  | 293620 |
| 8.248912  | up | NM_031606    | Pten    | 50557  |
| 4.251714  | up | XM_001078154 | Ptges2  | 311865 |
| 5.211276  | up | NM_138863    | Ptgr1   | 192227 |
| 2.929715  | up | XM_001060043 | Ptk9l   | 294420 |
| 2.8708913 | up | NM_031975    | Ptms    | 83801  |
| 6.187691  | up | NM_031579    | Ptp4a1  | 29463  |
| 39.806637 | up | NM_053475    | Ptp4a2  | 85237  |
| 22.131582 | up | XM_001069043 | Ptp4a3  | 362930 |
| 15.930162 | up | XM_001056514 | Ptpla   | 680115 |
| 15.492713 | up | XM_001077901 | Ptpmt1  | 29390  |
| 3.472538  | up | NM_057115    | Ptpn12  | 117255 |
| 3.0659547 | up | XM_001059696 | Ptpn13  | 498331 |
| 2.4518924 | up | XM_001066141 | Ptpn14  | 305064 |
| 6.56035   | up | NM_053990    | Ptpn2   | 117063 |
| 2.2008424 | up | NM_057204    | Ptpn23  | 117552 |
| 2.3332973 | up | XM_001055737 | Ptpn3   | 362524 |
| 11.493107 | up | NM_012763    | Ptpra   | 25167  |
| 5.9140677 | up | XM_001078855 | Ptprb   | 314843 |
| 4.7065306 | up | XM_001067936 | Ptprd   | 313278 |
| 3.381948  | up | NM_001029902 | Ptprk   | 360302 |
| 8.813046  | up | XM_001053209 | Ptprm   | 29616  |
| 7.583453  | up | NM_019140    | Ptprs   | 25529  |
| 79.57218  | up | XM_001057313 | Puf60   | 84401  |
| 10.328787 | up | XM_001063603 | Pum1    | 362609 |
| 8.762725  | up | XM_001068003 | Pum2    | 298874 |
| 3.334863  | up | XM_001063244 | Pura    | 307498 |
| 5.4769526 | up | NM_001025563 | Pus1    | 304567 |
| 2.2287507 | up | NM_001025278 | Pus10   | 305583 |
| 3.6494756 | up | XM_001057876 | Pus3    | 315554 |
| 4.820686  | up | XM_001061692 | Pus7    | 296751 |
| 5.1433067 | up | XM_001077744 | Pus11   | 362681 |
| 55.70644  | up | NM_022499    | Pvalb   | 25269  |
| 12.026629 | up | NM_017076    | PVR     | 25066  |
| 4.4291034 | up | XM_001075998 | Pwp1    | 362856 |
| 5.7831235 | up | NM_031587    | Pxmp2   | 29533  |

|            |    |              |          |        |
|------------|----|--------------|----------|--------|
| 12.456368  | up | NM_017234    | Pxmp3    | 29534  |
| 4.825143   | up | NM_001012147 | Pxn      | 360820 |
| 2.328567   | up | NM_001011993 | Pycl     | 300035 |
| 2.2622213  | up | NM_022268    | Pygl     | 64035  |
| 7.426434   | up | NM_001007624 | Qars     | 290868 |
| 43.2544    | up | NM_022390    | Qdpr     | 64192  |
| 5.0284023  | up | XM_574316    | Qk       | 499022 |
| 16.665504  | up | XM_001069252 | R3hcc1   | 361064 |
| 3.6101801  | up | XM_001054959 | R3hdm1   | 304763 |
| 14.103243  | up | XM_001056644 | R3hdm2   | 362894 |
| 37.86812   | up | NM_031090    | Rab1     | 81754  |
| 112.435326 | up | NM_017359    | Rab10    | 50993  |
| 19.387043  | up | NM_031152    | Rab11a   | 81830  |
| 26.239552  | up | NM_032617    | Rab11b   | 79434  |
| 133.85703  | up | XM_001053530 | Rab12    | 25530  |
| 3.751414   | up | NM_031092    | Rab13    | 81756  |
| 6.0552077  | up | NM_053589    | Rab14    | 94197  |
| 6.275916   | up | NM_001012468 | Rab18    | 307039 |
| 6.8247166  | up | NM_001004238 | Rab21    | 299799 |
| 28.427965  | up | NM_001015023 | Rab24    | 361208 |
| 4.131605   | up | NM_053978    | Rab28    | 117049 |
| 59.681698  | up | NM_031718    | Rab2a    | 65158  |
| 3.430185   | up | NM_001037645 | Rab2b    | 305853 |
| 3.6090252  | up | NM_145094    | Rab31    | 246324 |
| 2.2406912  | up | NM_001012140 | Rab34    | 360571 |
| 2.679969   | up | NM_001013046 | Rab35    | 288700 |
| 3.7400217  | up | NM_013018    | Rab3a    | 25531  |
| 9.698066   | up | XM_001064454 | Rab3gap2 | 289350 |
| 6.159319   | up | NM_017313    | Rab3ip   | 29885  |
| 7.2206106  | up | XM_001081838 | Rab40b   | 303754 |
| 2.9313014  | up | NM_013019    | Rab4a    | 25532  |
| 3.5811148  | up | NM_017355    | Rab4b    | 50866  |
| 2.2009048  | up | NM_022692    | Rab5a    | 64633  |
| 3.3205142  | up | NM_001079936 | Rab5b    | 288779 |
| 18.131107  | up | XM_001081435 | Rab5c    | 287709 |
| 5.1238585  | up | XM_001062702 | Rab6a    | 84379  |
| 40.688335  | up | NM_023950    | Rab7a    | 29448  |
| 5.1175103  | up | NM_133590    | Rab711   | 171122 |
| 5.6700864  | up | NM_053998    | Rab8a    | 117103 |
| 7.630401   | up | NM_153317    | Rab8b    | 266688 |
| 308.8508   | up | NM_031774    | Rabac1   | 83583  |
| 2.7937584  | up | NM_019124    | Rabep1   | 54190  |
| 2.2222292  | up | XM_001069323 | Rabgap11 | 304914 |
| 9.705811   | up | XM_001072217 | Rabgef1  | 360797 |

|           |    |              |         |        |
|-----------|----|--------------|---------|--------|
| 4.5058584 | up | NM_031654    | Rabggta | 58983  |
| 47.66696  | up | NM_138708    | Rabggtb | 25533  |
| 5.94442   | up | XM_001075907 | Rab14   | 300062 |
| 65.63303  | up | NM_134366    | Rac1    | 363875 |
| 3.4107347 | up | NM_001024778 | Rad17   | 310034 |
| 3.2101815 | up | NM_001025701 | Rad21   | 314949 |
| 130.35257 | up | NM_001013190 | Rad23a  | 361381 |
| 44.097664 | up | NM_001025275 | Rad23b  | 298012 |
| 3.5229812 | up | XM_001057419 | Rad52   | 297561 |
| 3.1171825 | up | NM_012639    | Raf1    | 24703  |
| 4.592635  | up | NM_001001718 | Rai12   | 287446 |
| 10.525889 | up | NM_001011958 | Raly    | 296301 |
| 9.292027  | up | NM_031646    | Ramp2   | 58966  |
| 82.98424  | up | NM_053439    | Ran     | 84509  |
| 2.5880358 | up | XM_001073477 | Ranbp10 | 361396 |
| 5.9281507 | up | XM_001053839 | Ranbp2  | 294429 |
| 27.658123 | up | XM_001056647 | Ranbp3  | 501281 |
| 2.2456594 | up | NM_001012199 | Rangap1 | 362965 |
| 5.083531  | up | XM_001078960 | Rangrf  | 287419 |
| 24.940947 | up | NM_001005765 | Rap1a   | 295347 |
| 96.33841  | up | NM_134346    | Rap1b   | 171337 |
| 2.1803322 | up | XM_001069856 | Rapgef2 | 310533 |
| 4.5715375 | up | XM_001060956 | Rapgef4 | 252857 |
| 4.1649647 | up | XM_001066365 | Rapsn   | 362161 |
| 2.2943072 | up | XM_001059523 | Rarb    | 24706  |
| 2.9970613 | up | NM_001013427 | Rarres2 | 297073 |
| 29.207443 | up | XM_213276    | Rars    | 287191 |
| 2.4948804 | up | XM_001065097 | Rars2   | 297969 |
| 5.2885094 | up | NM_013135    | Rasa1   | 25676  |
| 3.9075718 | up | NM_031574    | Rasa3   | 29372  |
| 2.3489525 | up | XM_001075445 | Rasl12  | 315762 |
| 2.7048352 | up | NM_001037096 | Rassf2  | 311437 |
| 2.370335  | up | XM_001074931 | Rassf8  | 312846 |
| 2.9551277 | up | XM_001054971 | Rb1cc1  | 312927 |
| 2.3630562 | up | XM_001072631 | Rbak    | 288489 |
| 4.449273  | up | XM_001060117 | Rbbp5   | 304794 |
| 7.245974  | up | XM_001073098 | Rbbp6   | 308968 |
| 46.80396  | up | NM_031816    | Rbbp7   | 83712  |
| 2.6324928 | up | XM_001072535 | Rbbp8   | 291787 |
| 3.7428882 | up | NM_021764    | Rbck1   | 60383  |
| 2.5736694 | up | NM_031094    | Rbl2    | 81758  |
| 4.5167584 | up | NM_152861    | Rbm10   | 64510  |
| 5.073121  | up | NM_139094    | Rbm16   | 245926 |
| 40.338524 | up | NM_001013058 | Rbm17   | 291295 |



|            |    |              |         |        |
|------------|----|--------------|---------|--------|
| 2.4052505  | up | XM_001062355 | Rbm20   | 309544 |
| 9.28084    | up | NM_001025676 | Rbm22   | 307410 |
| 9.424801   | up | XM_001073426 | Rbm24   | 690139 |
| 11.924314  | up | XM_001055193 | Rbm25   | 366693 |
| 4.441683   | up | XM_001069790 | Rbm27   | 361317 |
| 2.7527447  | up | XM_001063640 | Rbm28   | 312182 |
| 22.975786  | up | XM_001063211 | Rbm3    | 114488 |
| 3.5769274  | up | NM_001014015 | Rbm34   | 307956 |
| 11.300613  | up | XM_001054287 | Rbm38   | 366262 |
| 7.5299215  | up | XM_215201    | Rbm4    | 293663 |
| 10.102599  | up | NM_001014159 | Rbm42   | 361545 |
| 3.696093   | up | NM_153306    | Rbm45   | 266631 |
| 2.1986735  | up | NM_001007014 | Rbm4b   | 474154 |
| 6.286034   | up | XM_001073958 | Rbm6    | 315997 |
| 4.383428   | up | XM_001066319 | Rbm7    | 315634 |
| 15.857212  | up | XM_001059872 | Rbm8a   | 295284 |
| 13.426871  | up | NM_001079895 | Rbm9    | 362950 |
| 5.4120364  | up | NM_001025403 | Rbms2   | 288771 |
| 3.6084325  | up | XM_001061146 | Rbms3   | 680726 |
| 7.8908396  | up | XM_001071004 | Rbmxrtl | 307779 |
| 2.049832   | up | XM_001064167 | Rbpsuh  | 297767 |
| 4.894107   | up | NM_001034135 | Rbx1    | 300084 |
| 5.4128985  | up | XM_001073857 | Rc3h1   | 304916 |
| 4.598062   | up | XM_001053333 | Rc3h2   | 311909 |
| 19.093632  | up | NM_175578    | Rcan2   | 140666 |
| 5.967957   | up | NM_199084    | Rcbtb2  | 290363 |
| 8.811194   | up | NM_001007618 | Rchy1   | 289508 |
| 2.2878358  | up | NM_001013152 | Rcl1    | 309301 |
| 4.6277304  | up | XM_001069334 | Rcor3   | 684192 |
| 6.7565536  | up | XM_001071544 | Rcsd1   | 360872 |
| 18.174822  | up | NM_212548    | Rdbp    | 294258 |
| 3.8380523  | up | NM_181478    | Rdh10   | 353252 |
| 2.3289657  | up | NM_001012193 | Rdh11   | 362757 |
| 2.4785428  | up | XM_001072505 | Rdh14   | 500629 |
| 4.237154   | up | NM_199208    | Rdh2    | 299511 |
| 12.2703905 | up | XM_001081488 | Rdm1    | 287726 |
| 21.317673  | up | NM_001005889 | Rdx     | 315655 |
| 4.172528   | up | XM_001081701 | Recql5  | 287834 |
| 104.1151   | up | XM_344661    | Reep5   | 364838 |
| 6.728121   | up | NM_199267    | Rela    | 309165 |
| 2.865087   | up | XM_224732    | Rent1   | 306350 |
| 2.4251025  | up | XM_001060578 | Reps1   | 292944 |
| 44.18231   | up | NM_001039012 | Rer1    | 298675 |
| 4.083968   | up | XM_001057878 | Rev1    | 316344 |

|            |    |              |            |        |
|------------|----|--------------|------------|--------|
| 4.4552345  | up | NM_001083966 | Rev3l      | 309812 |
| 3.189305   | up | XM_001061328 | Rexo1      | 314630 |
| 15.215358  | up | NM_001033884 | Rexo4      | 311826 |
| 4.454775   | up | XM_001078203 | Rfc1       | 89809  |
| 7.631768   | up | NM_053786    | Rfc2       | 116468 |
| 2.3809743  | up | NM_021849    | Rfng       | 60433  |
| 2.0188124  | up | XM_001063006 | Rft1       | 290552 |
| 2.2295234  | up | XM_001062448 | Rftn1      | 501095 |
| 3.8216698  | up | XM_001075875 | Rfwd3      | 361409 |
| 2.0770168  | up | NM_001012172 | Rfx3       | 361746 |
| 3.2245874  | up | XM_001053787 | Rfx7       | 315804 |
| 2.2061808  | up | XM_576547    | Rfx8       | 501127 |
| 3.94871    | up | NM_001013136 | Rfxank     | 306353 |
| 3.4083376  | up | NM_001008337 | Rg9mtd1    | 304012 |
| 2.2418275  | up | NM_001013090 | Rg9mtd3    | 298081 |
| 10.6140175 | up | XM_001072931 | Rgc32      | 117183 |
| 33.29319   | up | NM_001004225 | RGD1303003 | 294326 |
| 5.9907417  | up | NM_001004219 | RGD1303117 | 292764 |
| 8.351325   | up | NM_001004244 | RGD1303127 | 300206 |
| 9.010332   | up | NM_001004226 | RGD1303130 | 295231 |
| 23.187279  | up | NM_201560    | RGD1303142 | 296346 |
| 5.290158   | up | NM_001009711 | RGD1304567 | 362671 |
| 4.508604   | up | XM_001076933 | RGD1304587 | 303180 |
| 4.008017   | up | XM_001073101 | RGD1304592 | 362461 |
| 2.4999263  | up | XM_001073554 | RGD1304610 | 305831 |
| 13.18962   | up | NM_001047874 | RGD1304704 | 302247 |
| 2.1438465  | up | XM_001067282 | RGD1304963 | 313891 |
| 6.030055   | up | XM_001068395 | RGD1304982 | 289138 |
| 7.682884   | up | NM_001013976 | RGD1305007 | 303749 |
| 13.394687  | up | XM_001074486 | RGD1305045 | 296050 |
| 3.5263374  | up | XM_001057128 | RGD1305110 | 305579 |
| 6.8267064  | up | XM_001065324 | RGD1305158 | 297971 |
| 14.284513  | up | NM_001025003 | RGD1305178 | 311855 |
| 3.1450415  | up | XM_001062898 | RGD1305202 | 311550 |
| 5.273228   | up | NM_001014013 | RGD1305215 | 307643 |
| 5.7831864  | up | NM_001017447 | RGD1305235 | 292267 |
| 19.196585  | up | XM_001074867 | RGD1305350 | 313699 |
| 2.0103102  | up | NM_001025652 | RGD1305420 | 298072 |
| 2.4896636  | up | XM_001057069 | RGD1305455 | 288545 |
| 22.489637  | up | NM_001047856 | RGD1305481 | 294030 |
| 13.81938   | up | NM_001013901 | RGD1305592 | 293500 |
| 12.259883  | up | XM_001065112 | RGD1305593 | 288513 |
| 2.7180827  | up | NM_001008297 | RGD1305689 | 290529 |
| 2.1344063  | up | XM_001067947 | RGD1305793 | 309456 |

|           |    |              |            |        |
|-----------|----|--------------|------------|--------|
| 4.3064804 | up | XM_001053257 | RGD1305823 | 360461 |
| 7.7668815 | up | XM_001078385 | RGD1306001 | 362975 |
| 4.316327  | up | XM_341506    | RGD1306058 | 361224 |
| 8.255075  | up | XM_001078821 | RGD1306074 | 296601 |
| 93.36796  | up | XM_001061185 | RGD1306148 | 313196 |
| 2.2913222 | up | XM_001055529 | RGD1306192 | 361443 |
| 5.0603385 | up | XM_001073540 | RGD1306215 | 296565 |
| 3.0704603 | up | XM_001080392 | RGD1306228 | 362748 |
| 3.919499  | up | NM_001008283 | RGD1306284 | 287918 |
| 2.2604425 | up | XM_001065721 | RGD1306371 | 314061 |
| 28.366234 | up | NM_001014126 | RGD1306410 | 360768 |
| 59.31198  | up | NM_001009635 | RGD1306437 | 290303 |
| 3.0545816 | up | NM_001013908 | RGD1306583 | 294709 |
| 5.490138  | up | NM_001025626 | RGD1306595 | 287554 |
| 14.87473  | up | XM_001081367 | RGD1306682 | 360617 |
| 2.6432123 | up | XM_001072521 | RGD1306717 | 311257 |
| 5.4941916 | up | NM_001039608 | RGD1306730 | 309009 |
| 10.96275  | up | XM_001080360 | RGD1306739 | 361834 |
| 5.374336  | up | XM_001069792 | RGD1306746 | 312511 |
| 3.9839756 | up | NM_001044252 | RGD1306809 | 365699 |
| 2.6424785 | up | XM_001054788 | RGD1306820 | 309069 |
| 4.222864  | up | XM_001081151 | RGD1306862 | 287596 |
| 3.2492154 | up | XM_342099    | RGD1306917 | 361805 |
| 6.7864122 | up | XM_001055149 | RGD1306936 | 297082 |
| 12.918065 | up | NM_001008288 | RGD1306954 | 288269 |
| 8.6725025 | up | XM_001073151 | RGD1306959 | 361624 |
| 4.437718  | up | XM_001055616 | RGD1306962 | 309570 |
| 7.952691  | up | XM_001077056 | RGD1307067 | 362840 |
| 2.2262394 | up | XM_001055449 | RGD1307071 | 311502 |
| 8.861228  | up | NM_001037184 | RGD1307100 | 294978 |
| 2.0919971 | up | NM_001037188 | RGD1307155 | 302998 |
| 2.5504441 | up | XM_001072759 | RGD1307158 | 361773 |
| 3.2909148 | up | NM_001025669 | RGD1307161 | 305031 |
| 8.952056  | up | XM_001080615 | RGD1307222 | 303300 |
| 6.1111445 | up | NM_001024875 | RGD1307254 | 298712 |
| 5.451677  | up | NM_001008343 | RGD1307279 | 307210 |
| 2.5407474 | up | XM_001060869 | RGD1307392 | 299209 |
| 15.698167 | up | XM_001081752 | RGD1307394 | 360667 |
| 2.0365098 | up | XM_001059692 | RGD1307396 | 360757 |
| 32.0485   | up | NM_001048043 | RGD1307399 | 681315 |
| 3.0733073 | up | NM_001009655 | RGD1307465 | 296200 |
| 8.362713  | up | XM_001059656 | RGD1307525 | 308053 |
| 11.398735 | up | XM_001072428 | RGD1307554 | 292739 |
| 2.478727  | up | XM_001056938 | RGD1307597 | 299197 |

|           |    |              |            |        |
|-----------|----|--------------|------------|--------|
| 5.2608542 | up | XM_001077827 | RGD1307615 | 362084 |
| 2.165942  | up | XM_001080064 | RGD1307621 | 314168 |
| 3.7845273 | up | NM_001013905 | RGD1307648 | 294004 |
| 19.458841 | up | NM_001024760 | RGD1307682 | 300675 |
| 6.112302  | up | XM_001057487 | RGD1307704 | 314300 |
| 72.38223  | up | NM_001013922 | RGD1307752 | 296315 |
| 17.840126 | up | NM_001017454 | RGD1307799 | 307833 |
| 9.9876585 | up | NM_001037192 | RGD1307890 | 304851 |
| 2.1500733 | up | XM_219870    | RGD1307934 | 293953 |
| 3.6294303 | up | XM_001074087 | RGD1308026 | 363029 |
| 2.4764907 | up | XM_001068778 | RGD1308048 | 298557 |
| 5.6351085 | up | XM_001075554 | RGD1308093 | 361034 |
| 3.4878907 | up | NM_001014248 | RGD1308127 | 365493 |
| 2.9002843 | up | XM_001080268 | RGD1308139 | 360563 |
| 13.29294  | up | NM_001014010 | RGD1308147 | 307008 |
| 7.578096  | up | XM_001055826 | RGD1308165 | 362516 |
| 5.23835   | up | XM_001076521 | RGD1308251 | 362676 |
| 2.921678  | up | XM_001061204 | RGD1308396 | 290235 |
| 7.2136264 | up | XM_001054512 | RGD1308430 | 361038 |
| 2.1870255 | up | NM_001014198 | RGD1308470 | 362778 |
| 5.0905657 | up | NM_001037181 | RGD1308517 | 290722 |
| 4.631485  | up | XM_001055958 | RGD1308601 | 307249 |
| 28.815535 | up | XM_214237    | RGD1308772 | 290381 |
| 2.1209416 | up | NM_001025677 | RGD1308782 | 308318 |
| 7.665945  | up | XM_001076708 | RGD1308923 | 362678 |
| 3.903757  | up | XM_001059736 | RGD1308958 | 298020 |
| 3.3057508 | up | NM_001013944 | RGD1309051 | 299153 |
| 3.4781964 | up | XM_001080751 | RGD1309077 | 360569 |
| 6.941489  | up | XM_001072347 | RGD1309085 | 297821 |
| 2.345774  | up | XM_001060014 | RGD1309095 | 301381 |
| 6.236811  | up | XM_001053125 | RGD1309102 | 291750 |
| 10.315539 | up | XM_001070787 | RGD1309104 | 289084 |
| 3.199852  | up | XM_001067663 | RGD1309148 | 298147 |
| 4.0092545 | up | NM_001017451 | RGD1309228 | 298851 |
| 4.00276   | up | XM_001061009 | RGD1309308 | 313115 |
| 3.3919122 | up | NM_001024884 | RGD1309362 | 307415 |
| 3.490954  | up | NM_001014246 | RGD1309482 | 365458 |
| 10.727316 | up | NM_001013918 | RGD1309540 | 295930 |
| 9.809525  | up | NM_001014140 | RGD1309676 | 361118 |
| 5.5471706 | up | NM_001014131 | RGD1309708 | 360867 |
| 88.10014  | up | XM_001072116 | RGD1309710 | 293700 |
| 5.1985645 | up | XM_001071109 | RGD1309730 | 295952 |
| 18.446491 | up | XM_001078661 | RGD1309748 | 302913 |
| 9.304702  | up | XM_001059108 | RGD1309759 | 361448 |

|            |    |              |            |        |
|------------|----|--------------|------------|--------|
| 11.377058  | up | XM_001059837 | RGD1309765 | 290746 |
| 2.422695   | up | XM_001075851 | RGD1309779 | 363074 |
| 9.59744    | up | XM_001067111 | RGD1309823 | 313525 |
| 2.8924487  | up | XM_001080214 | RGD1309829 | 296190 |
| 6.6333923  | up | NM_001014243 | RGD1309888 | 365215 |
| 3.0286398  | up | NM_001009246 | RGD1309906 | 287406 |
| 2.9997141  | up | XM_001069514 | RGD1309922 | 306007 |
| 3.8870044  | up | XM_001076152 | RGD1309995 | 314690 |
| 2.049064   | up | XM_001079614 | RGD1310016 | 309306 |
| 8.599079   | up | NM_001039015 | RGD1310230 | 301563 |
| 2.220318   | up | NM_001014197 | RGD1310311 | 362746 |
| 21.631466  | up | XM_001059237 | RGD1310313 | 298308 |
| 4.005594   | up | XM_001063969 | RGD1310348 | 360738 |
| 12.751267  | up | XM_001064076 | RGD1310351 | 298425 |
| 2.077996   | up | XM_001073512 | RGD1310352 | 303122 |
| 3.0371523  | up | XM_001077296 | RGD1310358 | 308537 |
| 5.2799635  | up | XM_001071619 | RGD1310427 | 362643 |
| 15.708614  | up | XM_001058484 | RGD1310552 | 300836 |
| 15.081357  | up | XM_001065132 | RGD1310587 | 360894 |
| 29.187237  | up | NM_001008360 | RGD1310686 | 360480 |
| 5.5058894  | up | XM_001057961 | RGD1310769 | 299207 |
| 3.800973   | up | XM_001064739 | RGD1310862 | 303016 |
| 6.687478   | up | XM_001081737 | RGD1311078 | 360664 |
| 4.644914   | up | XM_001064550 | RGD1311164 | 297607 |
| 2.6550765  | up | NM_001014173 | RGD1311265 | 361976 |
| 2.4564447  | up | NM_001025719 | RGD1311307 | 361238 |
| 28.233162  | up | XM_235517    | RGD1311310 | 315166 |
| 9.520416   | up | XM_001067219 | RGD1311345 | 361201 |
| 3.5854282  | up | XM_001081569 | RGD1311429 | 360642 |
| 27.637352  | up | XM_213210    | RGD1311433 | 287054 |
| 5.9148536  | up | NM_001009678 | RGD1311458 | 303948 |
| 3.6904633  | up | NM_001008318 | RGD1311578 | 298748 |
| 3.6717825  | up | XM_001079649 | RGD1311595 | 309307 |
| 3.218366   | up | XM_001068870 | RGD1311605 | 298841 |
| 2.8086905  | up | XM_001067917 | RGD1311634 | 293155 |
| 3.5125067  | up | XM_001071724 | RGD1311648 | 313949 |
| 10.7961645 | up | XM_001074468 | RGD1311660 | 288518 |
| 2.838093   | up | NM_001013898 | RGD1311703 | 293160 |
| 2.7217846  | up | NM_001008329 | RGD1311745 | 301079 |
| 3.6279085  | up | XM_001065046 | RGD1311756 | 362769 |
| 6.086711   | up | NM_001009638 | RGD1311805 | 291784 |
| 5.2645626  | up | XM_001053590 | RGD1311849 | 313346 |
| 10.814407  | up | NM_001024974 | RGD1311863 | 293871 |
| 10.530288  | up | NM_001009630 | RGD1311899 | 288704 |

|           |    |              |            |        |
|-----------|----|--------------|------------|--------|
| 3.6133637 | up | XM_001057895 | RGD1311910 | 307235 |
| 3.3985476 | up | NM_001025683 | RGD1311946 | 309145 |
| 2.4756124 | up | NM_001007702 | RGD1359108 | 313155 |
| 2.760386  | up | NM_001007657 | RGD1359127 | 299612 |
| 41.160313 | up | NM_001007659 | RGD1359310 | 300240 |
| 10.35214  | up | NM_001007676 | RGD1359380 | 303922 |
| 17.71095  | up | NM_001014193 | RGD1359529 | 362626 |
| 11.063678 | up | NM_001007663 | RGD1359616 | 300782 |
| 4.4802375 | up | XM_213514    | RGD1559482 | 498022 |
| 5.72023   | up | XM_001080525 | RGD1559545 | 503029 |
| 17.131346 | up | XM_001056249 | RGD1559610 | 313581 |
| 3.9353552 | up | XM_001080284 | RGD1559639 | 366656 |
| 3.6415713 | up | XM_001077671 | RGD1559667 | 497919 |
| 8.975693  | up | XM_001075526 | RGD1559682 | 361080 |
| 4.3451867 | up | XM_574157    | RGD1559715 | 498871 |
| 9.146895  | up | XM_001074399 | RGD1559750 | 295406 |
| 2.1374724 | up | XM_001080437 | RGD1559781 | 294376 |
| 6.3817563 | up | XM_001056621 | RGD1559794 | 503168 |
| 6.8029094 | up | XM_001065275 | RGD1559808 | 316158 |
| 2.307356  | up | XM_001070266 | RGD1559838 | 502591 |
| 4.52135   | up | XM_001079026 | RGD1559845 | 308494 |
| 2.743353  | up | XM_001072458 | RGD1559849 | 314468 |
| 2.7060628 | up | XM_575487    | RGD1559871 | 500135 |
| 15.836868 | up | XM_001056490 | RGD1559909 | 362592 |
| 8.497099  | up | XM_001058240 | RGD1559917 | 287993 |
| 5.40974   | up | XM_001063047 | RGD1559923 | 498489 |
| 3.8110213 | up | XM_001081019 | RGD1559940 | 503115 |
| 9.048006  | up | XM_001071140 | RGD1559955 | 367324 |
| 3.1818433 | up | XM_001081070 | RGD1559961 | 497974 |
| 2.0265515 | up | XM_001057888 | RGD1559972 | 363817 |
| 11.131097 | up | XM_001081687 | RGD1559979 | 503216 |
| 3.131261  | up | XM_001065433 | RGD1560000 | 365889 |
| 54.850613 | up | XM_001073577 | RGD1560011 | 315732 |
| 29.489895 | up | XM_001062160 | RGD1560015 | 499018 |
| 4.5924973 | up | XM_213187    | RGD1560124 | 302497 |
| 2.645887  | up | XM_223076    | RGD1560186 | 289384 |
| 3.6593146 | up | XM_001059137 | RGD1560263 | 499670 |
| 3.1296842 | up | XM_001066043 | RGD1560277 | 308763 |
| 9.960719  | up | XM_001072503 | RGD1560286 | 500575 |
| 44.73123  | up | XM_001056272 | RGD1560341 | 498869 |
| 2.6039307 | up | XM_001061644 | RGD1560433 | 296750 |
| 8.257157  | up | XM_001061418 | RGD1560451 | 366074 |
| 4.2708282 | up | XM_001064366 | RGD1560501 | 364239 |
| 4.156962  | up | XM_001078107 | RGD1560568 | 500914 |

|           |    |              |            |        |
|-----------|----|--------------|------------|--------|
| 2.1607087 | up | XM_241817    | RGD1560601 | 317432 |
| 6.824121  | up | XM_001057549 | RGD1560648 | 364583 |
| 2.689871  | up | XM_001078366 | RGD1560687 | 500804 |
| 4.433617  | up | XM_001055827 | RGD1560729 | 366411 |
| 3.4081337 | up | XM_001062341 | RGD1560755 | 361165 |
| 6.620023  | up | XM_001074726 | RGD1560778 | 316001 |
| 6.3291974 | up | XM_001053952 | RGD1560796 | 315798 |
| 7.097416  | up | XM_001058159 | RGD1560813 | 498894 |
| 2.3459964 | up | XM_001058994 | RGD1560821 | 367865 |
| 6.3094597 | up | XM_001057158 | RGD1560831 | 499803 |
| 2.017235  | up | XM_574398    | RGD1560854 | 499106 |
| 6.2818265 | up | XM_001058121 | RGD1560873 | 306238 |
| 6.9037294 | up | XM_001061556 | RGD1560888 | 498140 |
| 6.1800265 | up | XM_001058746 | RGD1560909 | 363221 |
| 9.330605  | up | XM_001063031 | RGD1560917 | 501028 |
| 2.2226176 | up | XM_001079730 | RGD1560936 | 293472 |
| 2.9076576 | up | XM_001055728 | RGD1561042 | 498386 |
| 7.7973766 | up | XM_001070733 | RGD1561055 | 501644 |
| 2.6498241 | up | XM_001059526 | RGD1561067 | 498642 |
| 3.7348557 | up | XM_001069296 | RGD1561134 | 307332 |
| 8.837554  | up | XM_001059732 | RGD1561137 | 366030 |
| 2.0242286 | up | XM_226771    | RGD1561161 | 294747 |
| 8.827897  | up | XM_343494    | RGD1561176 | 363155 |
| 8.324015  | up | XM_574742    | RGD1561179 | 499423 |
| 2.0426855 | up | XM_001065499 | RGD1561195 | 298126 |
| 7.756594  | up | XM_001069254 | RGD1561238 | 502091 |
| 131.54529 | up | XM_001061778 | RGD1561333 | 499374 |
| 2.1694489 | up | XM_001073485 | RGD1561381 | 498340 |
| 4.774525  | up | XM_001059755 | RGD1561394 | 311743 |
| 2.3605208 | up | XM_001059953 | RGD1561425 | 301378 |
| 6.718452  | up | XM_001061954 | RGD1561440 | 363942 |
| 3.6562004 | up | XM_001078588 | RGD1561453 | 309408 |
| 7.3583417 | up | XM_001064409 | RGD1561459 | 361606 |
| 8.370127  | up | XM_001058999 | RGD1561537 | 361197 |
| 12.279909 | up | XM_228802    | RGD1561594 | 317394 |
| 23.525745 | up | XM_001064224 | RGD1561618 | 367265 |
| 2.7269306 | up | XM_001054273 | RGD1561628 | 306428 |
| 5.4651647 | up | XM_001053157 | RGD1561671 | 361214 |
| 5.7964096 | up | XM_001079196 | RGD1561676 | 307917 |
| 29.114454 | up | XM_001061583 | RGD1561736 | 499794 |
| 4.9707637 | up | XM_001070434 | RGD1561792 | 298861 |
| 2.696597  | up | XM_578478    | RGD1561839 | 502972 |
| 3.61318   | up | XM_001075153 | RGD1561908 | 364036 |
| 2.2301204 | up | XM_001060744 | RGD1561963 | 301556 |

|           |    |              |            |        |
|-----------|----|--------------|------------|--------|
| 6.098606  | up | XM_001073022 | RGD1561993 | 296377 |
| 3.4877627 | up | XM_001080895 | RGD1562012 | 497962 |
| 2.457078  | up | XM_001070383 | RGD1562020 | 290820 |
| 2.1235628 | up | XM_001077854 | RGD1562055 | 287029 |
| 4.3905344 | up | XM_579917    | RGD1562079 | 499125 |
| 2.9433846 | up | XM_573072    | RGD1562125 | 497887 |
| 14.121373 | up | XM_001058517 | RGD1562165 | 366374 |
| 3.987605  | up | XM_001056900 | RGD1562178 | 500039 |
| 11.493984 | up | XM_001070030 | RGD1562259 | 500451 |
| 3.691261  | up | XM_001081219 | RGD1562272 | 303433 |
| 10.963677 | up | XM_576917    | RGD1562289 | 501516 |
| 2.2453387 | up | XM_001057462 | RGD1562291 | 301676 |
| 2.210479  | up | XM_001080948 | RGD1562299 | 299169 |
| 77.78609  | up | XM_575338    | RGD1562323 | 499984 |
| 2.1306708 | up | NM_001040019 | RGD1562373 | 501072 |
| 3.0352378 | up | XM_001072344 | RGD1562378 | 500351 |
| 2.5169683 | up | XM_001080819 | RGD1562381 | 314248 |
| 3.9154708 | up | XM_001059720 | RGD1562397 | 364060 |
| 4.2445827 | up | XM_001064690 | RGD1562399 | 301438 |
| 3.1748426 | up | XM_001079874 | RGD1562402 | 499133 |
| 2.0592597 | up | XM_001058023 | RGD1562404 | 314556 |
| 9.131399  | up | XM_001064372 | RGD1562407 | 307029 |
| 2.875098  | up | XM_001055546 | RGD1562461 | 503251 |
| 3.5605755 | up | XM_575924    | RGD1562484 | 500560 |
| 3.1353495 | up | XM_001073075 | RGD1562500 | 498096 |
| 3.5069165 | up | XM_001053847 | RGD1562502 | 363485 |
| 2.1560802 | up | XM_001080393 | RGD1562547 | 299740 |
| 2.0059237 | up | XM_001062602 | RGD1562552 | 498840 |
| 2.189722  | up | XM_001067020 | RGD1562553 | 501803 |
| 2.6852705 | up | XM_001074693 | RGD1562558 | 290019 |
| 148.43475 | up | XM_001056645 | RGD1562690 | 500965 |
| 37.037262 | up | XM_001075489 | RGD1562716 | 500254 |
| 5.5654435 | up | XM_001057627 | RGD1562717 | 363767 |
| 3.9702692 | up | XM_001065962 | RGD1562725 | 500559 |
| 9.956581  | up | XM_001054261 | RGD1562747 | 292328 |
| 2.9817228 | up | XM_001067272 | RGD1562758 | 498881 |
| 4.4275956 | up | XM_001063505 | RGD1562796 | 289715 |
| 18.392431 | up | XM_001072232 | RGD1562952 | 365661 |
| 13.544135 | up | XM_001054334 | RGD1562987 | 498886 |
| 2.462391  | up | XM_001073245 | RGD1562997 | 291773 |
| 2.9083006 | up | XM_001069221 | RGD1563091 | 500011 |
| 4.1918273 | up | XM_001068217 | RGD1563097 | 364613 |
| 4.2005467 | up | XM_001066541 | RGD1563099 | 292151 |
| 4.961103  | up | XM_001078525 | RGD1563106 | 303238 |



|           |    |              |            |        |
|-----------|----|--------------|------------|--------|
| 2.2752538 | up | XM_001079410 | RGD1563124 | 500817 |
| 2.279347  | up | XM_001068099 | RGD1563145 | 499937 |
| 6.07923   | up | XM_001074453 | RGD1563157 | 298910 |
| 18.829775 | up | XM_001059413 | RGD1563216 | 500694 |
| 13.779703 | up | XM_001063662 | RGD1563319 | 293632 |
| 2.6622117 | up | XM_001058849 | RGD1563412 | 368112 |
| 5.7123027 | up | NM_001077643 | RGD1563422 | 289182 |
| 13.378772 | up | XM_001079603 | RGD1563438 | 287442 |
| 17.740736 | up | XM_001072081 | RGD1563463 | 293699 |
| 3.3418949 | up | XM_001079076 | RGD1563482 | 498179 |
| 6.0462265 | up | XM_001078729 | RGD1563508 | 499250 |
| 2.0262861 | up | XM_001067946 | RGD1563524 | 302797 |
| 4.457662  | up | XM_001077912 | RGD1563570 | 498360 |
| 3.4137661 | up | XM_001064539 | RGD1563581 | 502110 |
| 62.594837 | up | XM_001064421 | RGD1563601 | 498731 |
| 5.920839  | up | XM_001077328 | RGD1563613 | 366605 |
| 2.1209576 | up | XM_001068593 | RGD1563636 | 292466 |
| 14.963414 | up | XM_001068508 | RGD1563658 | 366058 |
| 3.458878  | up | XM_001075700 | RGD1563705 | 501058 |
| 2.13503   | up | XM_001060668 | RGD1563812 | 498293 |
| 33.154804 | up | XM_001055755 | RGD1563861 | 498828 |
| 2.456576  | up | XM_001068357 | RGD1563888 | 360692 |
| 3.8194423 | up | XM_001058897 | RGD1563956 | 303815 |
| 5.195804  | up | XM_001056192 | RGD1563958 | 315521 |
| 2.341234  | up | XM_346307    | RGD1563991 | 367797 |
| 16.256464 | up | XM_001053149 | RGD1564051 | 501206 |
| 2.6661708 | up | XM_001059661 | RGD1564055 | 364059 |
| 8.532221  | up | XM_001065641 | RGD1564058 | 288925 |
| 2.006519  | up | XM_001070796 | RGD1564093 | 288920 |
| 3.50262   | up | XM_001067726 | RGD1564131 | 500871 |
| 3.2637146 | up | XM_001079061 | RGD1564148 | 287415 |
| 3.1848123 | up | XM_574980    | RGD1564171 | 499656 |
| 6.0771484 | up | XM_345912    | RGD1564209 | 367046 |
| 7.0390425 | up | XM_001067032 | RGD1564319 | 366089 |
| 3.265728  | up | XM_001074520 | RGD1564379 | 499758 |
| 7.8100204 | up | XM_001058193 | RGD1564400 | 295660 |
| 3.7786167 | up | XM_001081206 | RGD1564425 | 296169 |
| 28.127771 | up | XM_001068311 | RGD1564469 | 295340 |
| 6.538709  | up | XM_001071990 | RGD1564492 | 498914 |
| 2.4303806 | up | XM_001069119 | RGD1564583 | 310761 |
| 3.949595  | up | XM_001064912 | RGD1564698 | 497882 |
| 2.1762543 | up | XM_001064201 | RGD1564839 | 289401 |
| 5.978725  | up | XM_001080930 | RGD1564883 | 312363 |
| 5.4477105 | up | XM_001060995 | RGD1564899 | 498579 |

|           |    |              |            |        |
|-----------|----|--------------|------------|--------|
| 2.9350474 | up | XM_575773    | RGD1564940 | 500411 |
| 2.7372847 | up | XM_001060653 | RGD1564943 | 500551 |
| 12.41362  | up | XM_001059335 | RGD1564963 | 503169 |
| 3.6542275 | up | XM_001062086 | RGD1564964 | 315843 |
| 2.2061546 | up | XM_001080634 | RGD1565002 | 299135 |
| 3.1231596 | up | XM_001079107 | RGD1565010 | 314660 |
| 7.5079184 | up | XM_001055900 | RGD1565023 | 305671 |
| 5.0075793 | up | XM_001081584 | RGD1565033 | 498014 |
| 42.395084 | up | XM_001066800 | RGD1565054 | 299041 |
| 5.659435  | up | XM_001072499 | RGD1565073 | 502913 |
| 4.9095907 | up | XM_001057297 | RGD1565095 | 503252 |
| 2.89653   | up | XM_223417    | RGD1565119 | 305350 |
| 5.0514436 | up | XM_001071597 | RGD1565131 | 498143 |
| 2.1733065 | up | XM_001076997 | RGD1565145 | 367181 |
| 6.6478167 | up | XM_001077968 | RGD1565149 | 307923 |
| 5.8435206 | up | XM_001057767 | RGD1565183 | 293846 |
| 6.709072  | up | XM_577347    | RGD1565192 | 501923 |
| 2.0859847 | up | XM_001071740 | RGD1565210 | 499072 |
| 6.2462325 | up | XM_001059889 | RGD1565215 | 498998 |
| 3.0703588 | up | XM_001054203 | RGD1565222 | 498514 |
| 8.716358  | up | XM_344408    | RGD1565258 | 364385 |
| 2.6717741 | up | XM_001057346 | RGD1565310 | 362697 |
| 7.001726  | up | XM_001080915 | RGD1565317 | 363650 |
| 2.418868  | up | XM_001065101 | RGD1565368 | 500983 |
| 37.050865 | up | XM_001063205 | RGD1565371 | 501140 |
| 15.495816 | up | XM_575764    | RGD1565372 | 366307 |
| 3.061757  | up | XM_576453    | RGD1565403 | 501041 |
| 22.393206 | up | XM_001078166 | RGD1565456 | 314589 |
| 2.3837974 | up | XM_001081626 | RGD1565459 | 287782 |
| 2.2188919 | up | XM_001079014 | RGD1565486 | 497865 |
| 2.4877176 | up | XM_001076292 | RGD1565496 | 300783 |
| 2.1644375 | up | XM_001072329 | RGD1565545 | 308337 |
| 125.80369 | up | XM_001060296 | RGD1565566 | 499057 |
| 4.721446  | up | XM_001056445 | RGD1565579 | 367860 |
| 2.3122666 | up | XM_001077692 | RGD1565599 | 502599 |
| 2.6385565 | up | XM_001053477 | RGD1565641 | 499567 |
| 2.9916892 | up | XM_001059638 | RGD1565744 | 360494 |
| 3.5174396 | up | XM_001059981 | RGD1565767 | 311120 |
| 5.335695  | up | XM_001070697 | RGD1565775 | 361980 |
| 2.0636666 | up | XM_001076633 | RGD1565787 | 308429 |
| 16.626474 | up | XM_001060204 | RGD1565798 | 500923 |
| 2.8193698 | up | XM_001063774 | RGD1565829 | 317202 |
| 6.216225  | up | XM_001053108 | RGD1565900 | 300833 |
| 2.8887458 | up | XM_001056823 | RGD1565927 | 304020 |

|            |    |              |            |        |
|------------|----|--------------|------------|--------|
| 2.2038035  | up | XM_573334    | RGD1565928 | 498123 |
| 2.6757402  | up | XM_001080341 | RGD1565947 | 299737 |
| 2.9112165  | up | XM_001059689 | RGD1565965 | 302513 |
| 2.8375921  | up | XM_001064472 | RGD1565996 | 288136 |
| 3.2148597  | up | XM_001081529 | RGD1566002 | 303576 |
| 5.8781815  | up | XM_001064345 | RGD1566035 | 363438 |
| 2.2837675  | up | XM_001065417 | RGD1566036 | 498119 |
| 5.484369   | up | XM_001079792 | RGD1566052 | 687694 |
| 2.8441105  | up | XM_001053559 | RGD1566078 | 363514 |
| 8.296065   | up | XM_001056883 | RGD1566136 | 300278 |
| 3.3919716  | up | XM_001071067 | RGD1566137 | 301299 |
| 5.497376   | up | XM_235089    | RGD1566161 | 314782 |
| 7.098976   | up | XM_001077872 | RGD1566189 | 499244 |
| 13.8045435 | up | XM_574837    | RGD1566212 | 499512 |
| 14.707372  | up | XM_001065495 | RGD1566215 | 301742 |
| 17.53158   | up | XM_001067908 | RGD1566239 | 306348 |
| 2.5028307  | up | XM_001059999 | RGD1566265 | 363487 |
| 2.0765667  | up | XM_001065290 | RGD1566319 | 502988 |
| 3.1861064  | up | XM_001054551 | RGD1566320 | 296207 |
| 2.6004896  | up | XM_001056402 | RGD1566355 | 315362 |
| 2.7811496  | up | XM_001074530 | RGD1566369 | 291353 |
| 7.211941   | up | XM_574994    | RGD1566380 | 365871 |
| 3.3792496  | up | NM_139040    | RGD621098  | 207123 |
| 8.977221   | up | NM_199493    | RGD735029  | 307480 |
| 74.55105   | up | NM_199379    | RGD735065  | 294311 |
| 6.5186734  | up | NM_199112    | RGD735175  | 316530 |
| 2.3568177  | up | XM_001070966 | Rgl1       | 289080 |
| 4.3661346  | up | NM_212547    | Rgl2       | 294283 |
| 2.988994   | up | XM_001079315 | Rgs10      | 54290  |
| 4.3707504  | up | NM_021661    | Rgs19      | 59293  |
| 23.30863   | up | NM_019341    | Rgs5       | 54294  |
| 10.739623  | up | NM_001024891 | Rhbdd1     | 316557 |
| 3.4860387  | up | XM_001077358 | Rhbdd2     | 360793 |
| 2.479398   | up | NM_001013875 | Rhbdd3     | 289753 |
| 28.68318   | up | NM_013216    | Rheb       | 26954  |
| 16.969366  | up | NM_057132    | Rhoa       | 117273 |
| 12.625474  | up | NM_022542    | Rhob       | 64373  |
| 4.598167   | up | XM_001074130 | Rhobtb1    | 309722 |
| 5.6276245  | up | XM_001068816 | Rhoc       | 295342 |
| 22.718542  | up | NM_001037195 | Rhog       | 308875 |
| 14.886008  | up | XM_001080778 | Rhoj       | 299145 |
| 7.5645227  | up | NM_053522    | Rhoq       | 85428  |
| 14.454698  | up | NM_181823    | Rhot2      | 287156 |
| 6.1730103  | up | NM_001007715 | Ribc1      | 317431 |

|           |    |              |          |        |
|-----------|----|--------------|----------|--------|
| 4.220694  | up | XM_001058411 | Ric8a    | 293614 |
| 2.788127  | up | XM_001065608 | Rif1     | 295602 |
| 2.3598204 | up | XM_001080699 | Rilp     | 287531 |
| 18.447798 | up | XM_001079000 | Rilpl1   | 304469 |
| 5.1181293 | up | NM_001004205 | Rilpl2   | 288652 |
| 2.6840363 | up | XM_001054910 | Rin2     | 311494 |
| 5.539192  | up | NM_212549    | Ring1    | 309626 |
| 35.625282 | up | XM_001072670 | Riok3    | 361293 |
| 2.238199  | up | XM_001065998 | Ripk1    | 306886 |
| 8.824067  | up | XM_001056736 | Ripk2    | 362491 |
| 10.896959 | up | XM_001054292 | Rlf      | 313566 |
| 2.0912824 | up | NM_001024892 | Rlim     | 317241 |
| 4.330817  | up | XM_001058471 | Rmnd1    | 292268 |
| 4.474398  | up | XM_232051    | Rmnd5a   | 312439 |
| 2.341074  | up | NM_001017473 | Rmnd5b   | 497900 |
| 3.1621335 | up | NM_001012231 | Rnase13  | 497194 |
| 4.3133364 | up | NM_020082    | Rnase4   | 56759  |
| 10.860072 | up | NM_001013234 | Rnaseh2a | 364974 |
| 9.824584  | up | NM_001007007 | Rnaseh2b | 361056 |
| 13.119738 | up | XM_001079783 | Rnasek   | 287453 |
| 16.771334 | up | XM_001058381 | Rnasen   | 310159 |
| 4.143807  | up | XM_001070006 | Rnaset2  | 292306 |
| 2.6250753 | up | NM_001013222 | Rnd1     | 362993 |
| 95.37726  | up | NM_001011904 | Rnf10    | 288710 |
| 6.387433  | up | NM_053438    | Rnf103   | 84508  |
| 7.831431  | up | XM_001055544 | Rnf111   | 300813 |
| 3.1034348 | up | NM_001014791 | Rnf113a1 | 313450 |
| 31.465937 | up | NM_001001517 | Rnf114   | 362277 |
| 7.21216   | up | NM_001033702 | Rnf126   | 314613 |
| 2.2813933 | up | NM_001012010 | Rnf135   | 303350 |
| 20.567978 | up | XM_235338    | Rnf139   | 315000 |
| 20.946247 | up | XM_001066493 | Rnf14    | 619577 |
| 3.9133465 | up | XM_001067906 | Rnf145   | 287212 |
| 14.722157 | up | NM_001012060 | Rnf146   | 308051 |
| 5.313687  | up | XM_001055727 | Rnf160   | 288308 |
| 6.0824676 | up | NM_001002279 | Rnf166   | 365022 |
| 5.6113653 | up | NM_001024271 | Rnf185   | 360967 |
| 31.366732 | up | XM_233761    | Rnf19b   | 313806 |
| 6.7761984 | up | NM_001025667 | Rnf2     | 304850 |
| 2.1566975 | up | XM_001053479 | Rnf20    | 313216 |
| 31.081566 | up | XM_001057827 | Rnf217   | 292188 |
| 10.842248 | up | XM_001059460 | Rnf31    | 364386 |
| 4.4897914 | up | NM_001004075 | Rnf34    | 282845 |
| 4.0548954 | up | NM_019182    | Rnf4     | 29274  |

|           |    |              |            |        |
|-----------|----|--------------|------------|--------|
| 5.3745437 | up | NM_001012195 | Rnf41      | 362814 |
| 5.1626406 | up | XM_001070453 | Rnf6       | 304271 |
| 7.006333  | up | XM_001065291 | Rnf7       | 300948 |
| 3.1877105 | up | NM_001025727 | Rnf8       | 361815 |
| 16.020775 | up | XM_001081135 | Rnft1      | 360595 |
| 2.4383357 | up | XM_001057191 | Rngtt      | 313131 |
| 20.406353 | up | NM_139105    | Rnh1       | 245964 |
| 3.8504813 | up | NM_001008299 | Rnmt       | 291534 |
| 6.1294937 | up | NM_031097    | Rnpep      | 81761  |
| 31.295122 | up | XM_001070050 | Robld3     | 295234 |
| 14.989892 | up | XM_001066397 | Robld3-ps1 | 686067 |
| 2.009169  | up | NM_031098    | Rock1      | 81762  |
| 8.310779  | up | NM_013022    | Rock2      | 25537  |
| 12.877656 | up | NM_001024864 | Rogdi      | 287061 |
| 5.1330204 | up | XM_001053332 | Romo1      | 679572 |
| 2.0851872 | up | XM_001056400 | Rora       | 300807 |
| 2.0576153 | up | XM_001058675 | Rorc       | 368158 |
| 7.0086308 | up | NM_021582    | Rpa2       | 59102  |
| 5.4206295 | up | NM_001033060 | Rpain      | 287463 |
| 6.478651  | up | NM_001033999 | Rpap1      | 311338 |
| 5.8368263 | up | NM_001004243 | Rpap3      | 300189 |
| 5.917083  | up | NM_001033903 | Rpe        | 501157 |
| 6.774653  | up | XM_001062107 | Rpia       | 362383 |
| 158.64456 | up | NM_031100    | Rpl10      | 81764  |
| 4.0870266 | up | NM_031065    | Rpl10a     | 81729  |
| 13.361131 | up | NM_001025739 | Rpl11      | 362631 |
| 4.7426586 | up | XM_001059627 | Rpl12      | 296644 |
| 4.3249865 | up | NM_173340    | Rpl13a     | 317646 |
| 4.4625    | up | NM_022949    | Rpl14      | 65043  |
| 5.1445765 | up | NM_139114    | Rpl15      | 245981 |
| 5.235643  | up | NM_031102    | Rpl18      | 81766  |
| 11.92239  | up | NM_212510    | Rpl18a     | 290641 |
| 2.1289122 | up | NM_031103    | Rpl19      | 81767  |
| 4.2035537 | up | NM_031104    | Rpl22      | 81768  |
| 3.5358727 | up | XM_001064104 | Rpl2211    | 361923 |
| 3.0358908 | up | XM_001057847 | Rpl2212    | 680575 |
| 7.3618035 | up | NM_001007599 | Rpl23      | 29282  |
| 2.5923455 | up | XM_001059934 | Rpl23a     | 360572 |
| 24.991165 | up | XM_001060312 | Rpl2611    | 307636 |
| 20.192501 | up | XM_001068745 | Rpl26-ps1  | 685704 |
| 2.538263  | up | NM_022514    | Rpl27      | 64306  |
| 8.886663  | up | XM_001077420 | Rpl27a     | 293418 |
| 6.7075934 | up | NM_022697    | Rpl28      | 64638  |
| 47.595016 | up | NM_198753    | Rpl3       | 300079 |

|           |    |              |            |        |
|-----------|----|--------------|------------|--------|
| 4.0423784 | up | NM_022699    | Rpl30      | 64640  |
| 2.1254587 | up | NM_022506    | Rpl31      | 64298  |
| 7.6933    | up | NM_013226    | Rpl32      | 28298  |
| 2.7457495 | up | NM_212511    | Rpl35      | 296709 |
| 3.287145  | up | NM_031106    | Rpl37      | 81770  |
| 6.172988  | up | XM_001055547 | Rpl37a     | 363248 |
| 3.3523781 | up | XM_001058739 | Rpl37a-ps1 | 500547 |
| 8.374948  | up | XM_001066244 | Rpl37a-ps2 | 686028 |
| 3.5601988 | up | XM_001053404 | Rpl37-ps1  | 679570 |
| 2.4475656 | up | NM_001077592 | Rpl38      | 689284 |
| 6.4732466 | up | NM_012875    | Rpl39      | 25347  |
| 13.20305  | up | XM_001058430 | Rpl3l      | 287122 |
| 46.76025  | up | NM_022510    | Rpl4       | 64302  |
| 7.5257516 | up | NM_139083    | Rpl41      | 124440 |
| 20.489128 | up | NM_031099    | Rpl5       | 81763  |
| 5.1601143 | up | NM_053971    | Rpl6       | 117042 |
| 9.425128  | up | XM_001068131 | Rpl6-ps1   | 500714 |
| 3.4309642 | up | XM_001062960 | Rpl7       | 297755 |
| 9.059033  | up | XM_001065509 | Rpl7l1     | 317275 |
| 157.17615 | up | NM_001034916 | Rpl8       | 26962  |
| 78.822945 | up | NM_022402    | Rplp0      | 64205  |
| 11.645636 | up | NM_001007604 | Rplp1      | 140661 |
| 4.3136516 | up | NM_001030021 | Rplp2      | 140662 |
| 85.30404  | up | NM_013067    | Rpn1       | 25596  |
| 11.09377  | up | NM_031698    | Rpn2       | 64701  |
| 13.115519 | up | XM_001060859 | Rpp14      | 361020 |
| 3.4002464 | up | NM_001002831 | Rpp21      | 406230 |
| 3.2644017 | up | NM_001033063 | Rpp38      | 291317 |
| 6.569852  | up | NM_001013055 | Rpp40      | 291071 |
| 2.778801  | up | XM_001056597 | Rprd1a     | 291736 |
| 2.3316305 | up | XM_001067861 | Rprd1b     | 311591 |
| 3.2370534 | up | NM_031109    | Rps10      | 81773  |
| 112.47945 | up | NM_031110    | Rps11      | 81774  |
| 2.8078647 | up | NM_031709    | Rps12      | 65139  |
| 5.619554  | up | NM_130432    | Rps13      | 161477 |
| 9.87385   | up | NM_022672    | Rps14      | 29284  |
| 7.765059  | up | NM_017151    | Rps15      | 29285  |
| 5.1878486 | up | NM_053982    | Rps15a     | 117053 |
| 3.381123  | up | NM_017152    | Rps17      | 29286  |
| 52.406322 | up | NM_213557    | Rps18      | 294282 |
| 2.009713  | up | NM_001037346 | Rps19      | 29287  |
| 2.9387653 | up | XM_001076866 | Rps19bp1   | 500907 |
| 4.4160004 | up | NM_031838    | Rps2       | 83789  |
| 4.311083  | up | NM_001007603 | Rps20      | 122772 |

|           |    |              |           |        |
|-----------|----|--------------|-----------|--------|
| 5.0058203 | up | NM_031111    | Rps21     | 81775  |
| 18.596693 | up | NM_078617    | Rps23     | 124323 |
| 11.381827 | up | NM_031112    | Rps24     | 81776  |
| 14.651924 | up | NM_001005528 | Rps25     | 122799 |
| 11.115071 | up | NM_013224    | Rps26     | 27139  |
| 28.606462 | up | NM_053597    | Rps27     | 94266  |
| 3.1562588 | up | NM_031113    | Rps27a    | 81777  |
| 33.674442 | up | XM_001056747 | Rps27l    | 681429 |
| 3.2100701 | up | XM_001060434 | Rps28-ps1 | 50718  |
| 4.751335  | up | NM_012876    | Rps29     | 25348  |
| 6.9568458 | up | NM_001009239 | Rps3      | 140654 |
| 18.394327 | up | NM_017153    | Rps3a     | 29288  |
| 55.13319  | up | NM_001007600 | Rps4x     | 29426  |
| 25.918827 | up | XM_001062647 | Rps5      | 25538  |
| 4.0704694 | up | NM_017160    | Rps6      | 29304  |
| 2.0277715 | up | NM_031107    | Rps6ka1   | 81771  |
| 5.732904  | up | XM_001054840 | Rps6ka3   | 501560 |
| 16.43919  | up | NM_031985    | Rps6kb1   | 83840  |
| 13.104889 | up | NM_001010962 | Rps6kb2   | 361696 |
| 8.266759  | up | NM_031570    | Rps7      | 29258  |
| 3.844906  | up | NM_031706    | Rps8      | 65136  |
| 12.129392 | up | NM_031108    | Rps9      | 81772  |
| 36.803932 | up | NM_017138    | Rpsa      | 29236  |
| 4.724613  | up | XM_001078722 | Rpsud3    | 362416 |
| 2.7393184 | up | NM_001009357 | Rqcd1     | 301513 |
| 16.192564 | up | NM_053338    | Rrad      | 83521  |
| 2.6137373 | up | NM_001048184 | Rragc     | 298514 |
| 4.6878166 | up | XM_001063809 | Rragd     | 297960 |
| 21.775745 | up | XM_001080661 | Rras      | 361568 |
| 6.6742115 | up | NM_001013434 | Rras2     | 365355 |
| 5.4237995 | up | XM_001053542 | Rrbp1     | 311483 |
| 5.2489777 | up | XM_001064405 | Rrm1      | 685579 |
| 15.514588 | up | NM_001013236 | Rrm1-ps1  | 365320 |
| 14.158387 | up | XM_001053401 | Rrn3      | 304714 |
| 7.616296  | up | NM_001012073 | Rrp1      | 309674 |
| 2.3279107 | up | XM_001071108 | Rrp1b     | 309673 |
| 2.2403467 | up | NM_001008346 | Rrp8      | 308911 |
| 2.1459703 | up | XM_001071554 | Rrp9      | 363134 |
| 2.0989091 | up | NM_001079699 | Rrs1      | 297784 |
| 2.8051586 | up | NM_138881    | Rsad2     | 65190  |
| 3.5470428 | up | XM_001063020 | Rsbn1l    | 311987 |
| 2.1673002 | up | XM_001061808 | Rshl2     | 361476 |
| 7.1658077 | up | NM_001008876 | Rsl1d1    | 302898 |
| 7.4675045 | up | NM_001014212 | Rsl24d1   | 363099 |

|           |    |              |           |        |
|-----------|----|--------------|-----------|--------|
| 4.586198  | up | XM_001059176 | Rspo3     | 498997 |
| 20.344637 | up | NM_001014128 | Rsrc2     | 360807 |
| 32.73724  | up | XM_001057090 | Rsu1      | 680419 |
| 2.7541187 | up | NM_001008831 | RT1-Ba    | 309621 |
| 3.3684976 | up | NM_001004084 | RT1-Bb    | 309622 |
| 9.949883  | up | NM_001008839 | RT1-CE16  | 414819 |
| 8.671019  | up | NM_001008847 | RT1-Da    | 294269 |
| 15.50243  | up | NM_001008884 | RT1-Db1   | 294270 |
| 7.589453  | up | NM_198741    | RT1-DMa   | 294274 |
| 4.3448462 | up | NM_198740    | RT1-DMb   | 294273 |
| 2.659176  | up | NM_012646    | RT1-N1    | 24748  |
| 4.6023164 | up | NM_001008854 | RT1-N2    | 360323 |
| 29.927383 | up | NM_001008886 | RT1-S3    | 294228 |
| 2.5682268 | up | NM_001008858 | RT1-T24-1 | 361787 |
| 17.408562 | up | NM_001008826 | RT1-T24-4 | 414784 |
| 19.623634 | up | NM_001004227 | Rtcd1     | 295395 |
| 5.1090956 | up | XM_001057789 | Rtel1     | 362288 |
| 2.2089944 | up | NM_201562    | Rtn2      | 308410 |
| 10.164662 | up | NM_001009953 | Rtn3      | 140945 |
| 4.3075805 | up | XM_001062754 | Rtn4ip1   | 309912 |
| 11.116464 | up | XM_001056345 | Rtp4      | 360733 |
| 8.97464   | up | XM_001071405 | Rufy1     | 360521 |
| 2.004985  | up | XM_001072800 | Rufy2     | 690777 |
| 2.15944   | up | XM_001081465 | Rundc1    | 303552 |
| 3.596194  | up | NM_147177    | Ruvbl1    | 65137  |
| 18.540808 | up | NM_001025405 | Ruvbl2    | 292907 |
| 7.4375863 | up | NM_147146    | Rwdd1     | 259218 |
| 2.5945716 | up | XM_001070573 | Rwdd2b    | 304132 |
| 4.61409   | up | NM_031765    | Rxrg      | 83574  |
| 3.3210762 | up | NM_080402    | Ryk       | 140585 |
| 341.29175 | up | XM_001078539 | Ryr11     | 114207 |
| 3.5411859 | up | NM_001007636 | S100a1    | 295214 |
| 2.3600981 | up | NM_031114    | S100a10   | 81778  |
| 2.4428158 | up | XM_215607    | S100a13   | 295213 |
| 17.873999 | up | XM_001075704 | S100a16   | 361991 |
| 3.4367626 | up | NM_012618    | S100a4    | 24615  |
| 3.340571  | up | NM_053798    | Sacm11    | 116482 |
| 6.648634  | up | XM_001063390 | Sacs      | 305940 |
| 11.126279 | up | NM_001012063 | Sae1      | 308384 |
| 21.310642 | up | NM_022394    | Safb      | 64196  |
| 18.805332 | up | NM_001012040 | Samd8     | 305684 |
| 5.25031   | up | XM_001069386 | Samd9l    | 500015 |
| 20.03582  | up | NM_001004241 | Samm50    | 300111 |
| 4.5241046 | up | XM_001075034 | Sap30l    | 360531 |



|            |    |              |          |        |
|------------|----|--------------|----------|--------|
| 14.235388  | up | XM_001071295 | Saps1    | 361502 |
| 2.740529   | up | XM_001054912 | Saps2    | 300146 |
| 3.5426176  | up | XM_001067905 | Saps3    | 309144 |
| 34.97911   | up | NM_001007739 | Sar1a    | 361842 |
| 77.62087   | up | NM_001009622 | Sar1b    | 287276 |
| 104.564896 | up | NM_001007606 | Sars     | 266975 |
| 4.553297   | up | XM_001078462 | Sars2    | 292759 |
| 24.367435  | up | NM_031596    | Sart1    | 29678  |
| 4.4933734  | up | XM_001080462 | Sart3    | 304582 |
| 43.57728   | up | NM_001007667 | Sat1     | 302642 |
| 8.046428   | up | XM_001079461 | Sat2     | 360547 |
| 11.070946  | up | NM_001012129 | Satb1    | 316164 |
| 20.88713   | up | NM_001097581 | Sav1     | 299116 |
| 67.46099   | up | NM_001008289 | Sbds     | 288615 |
| 4.216917   | up | XM_001054780 | Sbf1     | 300147 |
| 6.241142   | up | XM_001074548 | Sbno1    | 304470 |
| 3.985643   | up | XM_001073102 | Sbno2    | 314619 |
| 6.0616755  | up | NM_053642    | Sc5dl    | 114100 |
| 2.1804943  | up | NM_021581    | Sc65     | 59101  |
| 16.194706  | up | XM_342174    | Scamp1   | 29521  |
| 9.527726   | up | NM_023955    | Scamp2   | 65168  |
| 31.033075  | up | XM_001074344 | Scamp3   | 65169  |
| 10.731121  | up | XM_001077128 | Scap     | 301024 |
| 3.3621497  | up | NM_031541    | Scarb1   | 25073  |
| 3.7724607  | up | XM_001057528 | Scarf1   | 303313 |
| 11.479213  | up | NM_001013985 | Sccpdh   | 305021 |
| 2.752488   | up | NM_001017499 | Scfd2    | 498353 |
| 18.735817  | up | XM_001061765 | Schip1   | 295105 |
| 2.288605   | up | XM_001053591 | Scmh1    | 362581 |
| 270.8901   | up | NM_017288    | Scn1b    | 29686  |
| 6.764826   | up | XM_001055032 | Scnm1    | 310662 |
| 3.255067   | up | XM_001078805 | Sco1     | 497930 |
| 7.045967   | up | NM_138508    | Scp2     | 25541  |
| 6.5641847  | up | NM_133383    | Scpep1   | 114861 |
| 3.8900657  | up | XM_001074724 | Scrib    | 362938 |
| 8.26007    | up | NM_001013162 | Scrn3    | 311731 |
| 2.675826   | up | XM_001077553 | Scube2   | 499241 |
| 39.658386  | up | XM_001060414 | Sex      | 680712 |
| 3.279479   | up | NM_001011938 | Scyl1    | 293684 |
| 4.8076386  | up | XM_001076749 | Scyl2    | 314717 |
| 22.577604  | up | NM_013082    | Sdc2     | 25615  |
| 9.397431   | up | NM_012649    | Sdc4     | 24771  |
| 15.350042  | up | NM_031986    | Sdcbp    | 83841  |
| 2.6773343  | up | NM_001013199 | Sdccag10 | 361887 |

|           |    |              |             |        |
|-----------|----|--------------|-------------|--------|
| 5.1326895 | up | XM_001077607 | Sdccag1-ps1 | 299114 |
| 31.340036 | up | NM_001013135 | Sdccag3     | 306322 |
| 2.0987966 | up | NM_177929    | Sdccag8     | 305002 |
| 5.219821  | up | XM_001080807 | Sdf2        | 287470 |
| 27.797516 | up | NM_130412    | Sdf4        | 155173 |
| 190.34729 | up | NM_130428    | Sdha        | 157074 |
| 8.896291  | up | NM_001008371 | Sdhaf2      | 361726 |
| 49.991814 | up | NM_001005534 | Sdhc        | 289217 |
| 80.81287  | up | NM_198788    | Sdhd        | 363061 |
| 8.742937  | up | XM_001061937 | Sdr39u1     | 361044 |
| 2.2749531 | up | XM_001080769 | Sec1        | 308586 |
| 35.356026 | up | NM_031723    | Sec11a      | 65166  |
| 68.69557  | up | NM_001006978 | Sec13       | 297522 |
| 12.263093 | up | XM_001081756 | Sec1411     | 360668 |
| 2.0526931 | up | NM_053571    | Sec16b      | 89868  |
| 3.514691  | up | NM_057147    | Sec22a      | 117513 |
| 53.51553  | up | NM_001025686 | Sec22b      | 310710 |
| 17.68143  | up | XM_001076053 | Sec23a      | 58817  |
| 4.9251056 | up | XM_001054580 | Sec23b      | 362226 |
| 3.144633  | up | XM_001080274 | Sec23ip     | 309010 |
| 6.708977  | up | XM_001075268 | Sec24b      | 295461 |
| 4.052852  | up | XM_001075384 | Sec24d      | 310843 |
| 30.578138 | up | NM_033021    | Sec31a      | 93646  |
| 2.3424625 | up | NM_001024770 | Sec311      | 305287 |
| 6.6187625 | up | XM_341558    | Sec61a2     | 361273 |
| 2.5353317 | up | XM_001056613 | Sec61b      | 298068 |
| 2.8558748 | up | NM_001034129 | Sec62       | 294912 |
| 4.5225453 | up | NM_024002    | Secisbp2    | 79049  |
| 13.680724 | up | XM_001077702 | Secisbp21   | 296115 |
| 9.655346  | up | NM_023027    | Secp43      | 65241  |
| 2.8797722 | up | NM_199082    | Sectm1b     | 287884 |
| 11.023137 | up | NM_177933    | Sel11       | 314352 |
| 13.400753 | up | NM_207589    | Selk        | 290549 |
| 7.391009  | up | NM_001085485 | Selo        | 315216 |
| 3.8241944 | up | NM_173120    | Sels        | 286900 |
| 13.441906 | up | NM_001014253 | Selt        | 365802 |
| 4.078125  | up | NM_001079942 | Sema3b      | 363142 |
| 9.463491  | up | XM_001064163 | Sema3c      | 296787 |
| 2.2821941 | up | XM_001077367 | Sema6d      | 311384 |
| 3.6426246 | up | NM_023989    | Senp2       | 78973  |
| 19.227617 | up | XM_001078584 | Senp3       | 303245 |
| 6.6187935 | up | XM_001061212 | Senp6       | 300860 |
| 2.8701303 | up | XM_001057745 | Senp7       | 288167 |
| 3.9533145 | up | NM_001079889 | Sephs2      | 308993 |

|            |    |              |           |        |
|------------|----|--------------|-----------|--------|
| 18.551388  | up | NM_013027    | Sepw1     | 25545  |
| 35.06209   | up | NM_001044285 | Sepx1     | 685059 |
| 2.4130604  | up | XM_574308    | Serac1    | 499015 |
| 16.843605  | up | NM_145086    | Serbp1    | 246303 |
| 7.494993   | up | XM_001080802 | Sergef    | 365243 |
| 14.52121   | up | NM_182951    | Serinc1   | 294421 |
| 38.907227  | up | NM_001031656 | Serinc2   | 313057 |
| 9.881882   | up | NM_138825    | Serpina12 | 191570 |
| 2.3496234  | up | NM_001031642 | Serpinb1a | 291091 |
| 7.7451177  | up | XM_001060394 | Serpine2  | 29366  |
| 14.817408  | up | NM_177927    | Serpinf1  | 287526 |
| 24.479012  | up | NM_199093    | Serping1  | 295703 |
| 5.42685    | up | NM_001024903 | Sertad2   | 498423 |
| 19.319017  | up | XM_001063428 | Sesn1     | 294518 |
| 8.649124   | up | XM_001066119 | Sestd1    | 295678 |
| 4.833836   | up | XM_001075829 | Setd2     | 316013 |
| 22.345997  | up | XM_001069129 | Setd3     | 299295 |
| 2.5646973  | up | XM_001070821 | Setd4     | 245975 |
| 2.4159915  | up | XM_001056961 | Setd6     | 291844 |
| 2.4585598  | up | XM_573394    | Setd8-ps1 | 498178 |
| 7.8668275  | up | NM_058210    | Sf1       | 117855 |
| 8.767079   | up | NM_001025698 | Sf3a3     | 313583 |
| 19.27864   | up | XM_001066744 | Sf3b1     | 84486  |
| 41.18455   | up | XM_001073034 | Sf3b2     | 293671 |
| 10.409397  | up | XM_001077410 | Sf3b3     | 292019 |
| 2.5781698  | up | NM_001011951 | Sf3b4     | 295270 |
| 12.381041  | up | XM_001059359 | Sf3b5     | 680891 |
| 4.9917784  | up | NM_001011920 | Sf4       | 290666 |
| 6.734101   | up | NM_031647    | Sfmbt1    | 58967  |
| 2.0493314  | up | NM_053544    | Sfrp4     | 89803  |
| 17.356853  | up | XM_001072402 | Sfrs1     | 689890 |
| 6.612111   | up | NM_001035255 | Sfrs11    | 502603 |
| 9.172322   | up | NM_020092    | Sfrs12    | 56763  |
| 17.496964  | up | XM_001055451 | Sfrs18    | 297942 |
| 3.0394742  | up | NM_001009720 | Sfrs2     | 494445 |
| 13.5902195 | up | XM_001064077 | Sfrs4     | 362612 |
| 28.664425  | up | NM_001014185 | Sfrs6     | 362264 |
| 3.0820758  | up | NM_001039035 | Sfrs7     | 362687 |
| 5.826501   | up | NM_001034924 | Sfrs8     | 304431 |
| 12.793834  | up | NM_001008302 | Sft2d1    | 292305 |
| 2.552496   | up | XM_001073930 | Sfxn4     | 361778 |
| 4.977682   | up | NM_153298    | Sfxn5     | 261737 |
| 40.94429   | up | XM_001081302 | Sgca      | 303468 |
| 4.5510116  | up | XM_001056227 | Sgcb      | 680229 |

|           |    |              |          |        |
|-----------|----|--------------|----------|--------|
| 49.69303  | up | XM_001069547 | Sgcd     | 497892 |
| 212.0373  | up | NM_001006993 | Sgcg     | 305941 |
| 4.7604146 | up | NM_019232    | Sgk1     | 29517  |
| 25.389349 | up | NM_181386    | Sgms1    | 353229 |
| 3.4079874 | up | XM_001080791 | Sgpp1    | 81536  |
| 10.40082  | up | NM_022703    | Sgta     | 64667  |
| 3.0464892 | up | NM_053669    | Sh2b2    | 114203 |
| 98.20129  | up | XM_001053494 | Sh3bgr   | 498066 |
| 4.1868453 | up | XM_001067638 | Sh3bgrl3 | 298544 |
| 159.7302  | up | NM_001011929 | Sh3glb1  | 292156 |
| 2.8248124 | up | NM_001009692 | Sh3glb2  | 311848 |
| 4.143611  | up | NM_053360    | Sh3kbp1  | 84357  |
| 10.296311 | up | NM_001034187 | Sh3rf2   | 307472 |
| 2.2782624 | up | XM_001057749 | Sh3tc1   | 305441 |
| 3.088929  | up | NM_031153    | Sharpin  | 81859  |
| 22.48104  | up | NM_001077826 | Shisa4   | 360848 |
| 27.210037 | up | NM_001006989 | Shisa5   | 301013 |
| 5.5064373 | up | NM_001047842 | Shmt1    | 287379 |
| 11.051339 | up | NM_001008322 | Shmt2    | 299857 |
| 5.8524485 | up | NM_001013155 | Shoc2    | 309548 |
| 2.8007581 | up | XM_001069964 | Shprh    | 308282 |
| 10.25865  | up | NM_080905    | Siah1a   | 140941 |
| 2.436474  | up | NM_001015036 | Siat7F   | 407765 |
| 2.5404098 | up | XM_001068825 | Sidt2    | 315617 |
| 4.5940595 | up | NM_001012182 | Sike     | 362007 |
| 3.1811566 | up | NM_199376    | Sil1     | 291673 |
| 8.206169  | up | XM_343395    | Sin3a    | 363067 |
| 12.217725 | up | XM_001062859 | Sin3b    | 683381 |
| 2.0355723 | up | NM_001004089 | Sipa1    | 361710 |
| 3.7793236 | up | NM_139330    | Sipa111  | 246212 |
| 2.4776409 | up | NM_001009704 | Sipa112  | 361442 |
| 3.3485687 | up | XM_001080493 | Sirt1    | 309757 |
| 22.83627  | up | NM_001008368 | Sirt2    | 361532 |
| 6.3276267 | up | XM_001058755 | Sirt3    | 293615 |
| 7.140189  | up | NM_001004256 | Sirt5    | 306840 |
| 3.1532516 | up | NM_001031649 | Sirt6    | 299638 |
| 2.0998604 | up | XM_001072396 | Siva1    | 362791 |
| 18.505146 | up | XM_001080688 | Six1     | 114634 |
| 2.8509724 | up | XM_001059855 | Six2     | 366542 |
| 4.680904  | up | NM_213559    | Skiv2l   | 294260 |
| 9.904751  | up | NM_001007608 | Skp1     | 287280 |
| 16.916681 | up | XM_001076917 | Slain2   | 305310 |
| 5.5480676 | up | NM_001024368 | Slc10a3  | 501665 |
| 5.9473386 | up | NM_013173    | Slc11a2  | 25715  |

|           |    |              |          |        |
|-----------|----|--------------|----------|--------|
| 28.828806 | up | NM_031798    | Slc12a2  | 83629  |
| 12.767719 | up | NM_019229    | Slc12a4  | 29501  |
| 2.1423159 | up | XM_001066528 | Slc12a6  | 691209 |
| 2.5794578 | up | NM_001009713 | Slc17a5  | 363103 |
| 3.354403  | up | NM_031148    | Slc20a1  | 81826  |
| 7.06197   | up | NM_177421    | Slc22a17 | 305886 |
| 3.8272278 | up | XM_001065778 | Slc22a23 | 64559  |
| 9.228933  | up | NM_022270    | Slc22a4  | 64037  |
| 3.4296114 | up | NM_019269    | Slc22a5  | 29726  |
| 78.59457  | up | NM_022398    | Slc25a11 | 64201  |
| 5.112881  | up | XM_342445    | Slc25a12 | 362145 |
| 2.1495433 | up | NM_001047880 | Slc25a15 | 306574 |
| 4.596383  | up | XM_001076461 | Slc25a17 | 300083 |
| 5.018639  | up | NM_001007674 | Slc25a19 | 303676 |
| 23.26765  | up | NM_053965    | Slc25a20 | 117035 |
| 2.106371  | up | XM_001068401 | Slc25a28 | 688811 |
| 28.788841 | up | NM_139100    | Slc25a3  | 245959 |
| 5.5126014 | up | XM_001061863 | Slc25a32 | 315023 |
| 7.079645  | up | NM_053515    | Slc25a4  | 85333  |
| 2.5049949 | up | XM_001069918 | Slc25a44 | 365841 |
| 16.655571 | up | XM_001059020 | Slc25a46 | 291709 |
| 2.713241  | up | XM_001081843 | Slc26a11 | 360670 |
| 9.971856  | up | NM_031664    | Slc28a2  | 60423  |
| 86.87886  | up | NM_031684    | Slc29a1  | 63997  |
| 38.78038  | up | NM_012751    | Slc2a4   | 25139  |
| 3.855146  | up | NM_001083122 | Slc30a2  | 25362  |
| 3.225537  | up | NM_172066    | Slc30a4  | 64469  |
| 7.76119   | up | XM_001062806 | Slc30a5  | 294698 |
| 3.9031754 | up | XM_001065683 | Slc30a6  | 298786 |
| 13.428535 | up | XM_001057251 | Slc30a9  | 498358 |
| 5.6206985 | up | NM_133600    | Slc31a1  | 171135 |
| 5.8178816 | up | NM_001033693 | Slc31a2  | 298091 |
| 2.2175252 | up | NM_147140    | Slc35a4  | 257647 |
| 67.9987   | up | NM_199081    | Slc35b1  | 287642 |
| 6.2882433 | up | NM_001037215 | Slc35b2  | 501103 |
| 2.479444  | up | XM_001071455 | Slc35c2  | 311637 |
| 2.2302089 | up | XM_001080983 | Slc35e3  | 362883 |
| 2.0248976 | up | NM_153316    | Slc35e4  | 266687 |
| 4.451815  | up | XM_001056041 | Slc35f5  | 288993 |
| 2.8935685 | up | XM_001067156 | Slc37a3  | 312255 |
| 29.073355 | up | NM_031589    | Slc37a4  | 29573  |
| 51.495216 | up | NM_181090    | Slc38a2  | 29642  |
| 4.5956936 | up | NM_001035251 | Slc38a9  | 310091 |
| 8.609522  | up | NM_001039196 | Slc39a13 | 295928 |

|           |    |              |          |        |
|-----------|----|--------------|----------|--------|
| 15.033505 | up | NM_019283    | Slc3a2   | 50567  |
| 2.6164434 | up | NM_133315    | Slc40a1  | 170840 |
| 2.573153  | up | XM_001059484 | Slc41a1  | 363985 |
| 6.6446576 | up | XM_001065058 | Slc43a1  | 311168 |
| 2.4699044 | up | XM_001080703 | Slc43a2  | 287532 |
| 3.626061  | up | XM_001069690 | Slc43a3  | 311170 |
| 13.988011 | up | NM_001033852 | Slc44a1  | 85254  |
| 2.1735952 | up | NM_001024968 | Slc46a3  | 288454 |
| 4.3483706 | up | XM_001067937 | Slc4a1ap | 298805 |
| 2.0550141 | up | NM_017048    | Slc4a2   | 24780  |
| 4.2588058 | up | NM_017049    | Slc4a3   | 24781  |
| 2.58269   | up | NM_053424    | Slc4a4   | 84484  |
| 7.8461237 | up | NM_130746    | Slc5a6   | 170551 |
| 11.139577 | up | NM_017206    | Slc6a6   | 29464  |
| 47.65488  | up | NM_017348    | Slc6a8   | 50690  |
| 2.20997   | up | XM_001074656 | Slc7a6os | 246187 |
| 2.870488  | up | XM_001053956 | Slc9a6   | 302863 |
| 32.77783  | up | NM_177481    | Slco3a1  | 140915 |
| 4.8523407 | up | NM_133608    | Slco4a1  | 171144 |
| 3.0391235 | up | XM_001064830 | Slco5a1  | 312907 |
| 5.1188855 | up | NM_053687    | Slfn3    | 114247 |
| 3.8266156 | up | XM_001057214 | Slmap    | 290533 |
| 95.91186  | up | NM_001013247 | Sln      | 367086 |
| 3.8906302 | up | XM_001067382 | Slu7     | 303057 |
| 4.826588  | up | NM_013130    | Smad1    | 25671  |
| 3.6318076 | up | NM_019191    | Smad2    | 29357  |
| 2.765734  | up | NM_013095    | Smad3    | 25631  |
| 6.013317  | up | NM_019275    | Smad4    | 50554  |
| 2.8799045 | up | NM_021692    | Smad5    | 59328  |
| 3.498182  | up | NM_182817    | Smagp    | 300236 |
| 45.8315   | up | XM_001073453 | Smarca4  | 171379 |
| 5.0602164 | up | XM_001074047 | Smarca5  | 307766 |
| 2.146983  | up | XM_001066395 | Smarcad1 | 312398 |
| 4.8971004 | up | NM_001025728 | Smarcb1  | 361825 |
| 2.551494  | up | NM_031983    | Smarcd2  | 83833  |
| 2.4465587 | up | XM_001069997 | Smc4     | 295107 |
| 2.7858    | up | XM_001056555 | Smchd1   | 316732 |
| 3.3714314 | up | NM_001007709 | Smcr7l   | 315141 |
| 2.401952  | up | XM_001065812 | Smek1    | 314388 |
| 2.6155045 | up | XM_001053322 | Smek2    | 360993 |
| 4.757347  | up | NM_022509    | Smn1     | 64301  |
| 6.925736  | up | NM_001025400 | Smndc1   | 287768 |
| 12.02527  | up | XM_001053050 | Smoc2    | 292401 |
| 15.675182 | up | NM_001006997 | Smpd1    | 308909 |

|           |    |              |         |        |
|-----------|----|--------------|---------|--------|
| 5.3640623 | up | NM_001005539 | Smpdl3a | 294422 |
| 29.57417  | up | NM_001025737 | Smpdl3b | 362619 |
| 2.4886558 | up | XM_001066720 | Smtn    | 289734 |
| 33.00937  | up | XM_001069604 | Smtnl1  | 311167 |
| 5.488242  | up | XM_001053796 | Smtnl2  | 679629 |
| 31.368296 | up | NM_057195    | Smu1    | 117541 |
| 22.072325 | up | XM_001062526 | Smyd1   | 297333 |
| 41.304718 | up | XM_001066311 | Smyd2   | 289372 |
| 3.0430236 | up | NM_001025762 | Smyd3   | 498295 |
| 2.0365353 | up | XM_001080679 | Smyd4   | 287525 |
| 4.1633997 | up | NM_022689    | Snap23  | 64630  |
| 3.6471264 | up | NM_053810    | Snap29  | 116500 |
| 4.708569  | up | NM_001025648 | Snapap  | 295217 |
| 2.3803818 | up | NM_001013121 | Snapc2  | 304204 |
| 3.68304   | up | NM_001013212 | Snapc3  | 362537 |
| 4.4746523 | up | NM_031688    | Sncg    | 64347  |
| 9.17773   | up | NM_022694    | Snd1    | 64635  |
| 6.0759997 | up | NM_001007804 | Snf8    | 287645 |
| 2.6685898 | up | XM_001074745 | Snrnp27 | 362392 |
| 9.23275   | up | NM_001014127 | Snrnp35 | 360803 |
| 19.791256 | up | XM_232775    | Snrnp40 | 313056 |
| 5.7257195 | up | XM_001079238 | Snrnp70 | 361574 |
| 2.9781199 | up | NM_001008303 | Snrpa   | 292729 |
| 4.877392  | up | XM_001059527 | Snrpb   | 171365 |
| 29.573055 | up | XM_001053334 | Snrpb2  | 362223 |
| 5.3010254 | up | XM_001060646 | Snrpd1  | 291794 |
| 2.4545147 | up | XM_001058626 | Snrpf   | 680737 |
| 39.441887 | up | XM_001064932 | Snta1   | 362242 |
| 3.4757576 | up | XM_001059272 | Snw1    | 500695 |
| 6.0830846 | up | NM_053411    | Snx1    | 84471  |
| 3.205776  | up | XM_001069787 | Snx12   | 363478 |
| 7.8595557 | up | XM_001076819 | Snx13   | 362731 |
| 5.8753743 | up | XM_001065843 | Snx14   | 315871 |
| 4.0562897 | up | NM_022289    | Snx16   | 64088  |
| 11.794777 | up | NM_001011981 | Snx17   | 298836 |
| 7.729439  | up | XM_001057944 | Snx2    | 291464 |
| 2.8665364 | up | XM_001061047 | Snx25   | 306471 |
| 11.254739 | up | NM_152847    | Snx27   | 260323 |
| 11.611617 | up | XM_001053951 | Snx5    | 296199 |
| 4.880645  | up | NM_001012083 | Snx7    | 310815 |
| 2.1458406 | up | XM_001067064 | Snx9    | 683687 |
| 4.847493  | up | NM_058208    | Socs2   | 84607  |
| 18.018675 | up | XM_001063512 | Socs6   | 307200 |
| 65.15164  | up | NM_017050    | Sod1    | 24786  |

|           |    |              |         |        |
|-----------|----|--------------|---------|--------|
| 102.36897 | up | NM_017051    | Sod2    | 24787  |
| 3.1591833 | up | NM_012880    | Sod3    | 25352  |
| 20.325779 | up | XM_001068992 | Son     | 304092 |
| 3.0704238 | up | NM_017052    | Sord    | 24788  |
| 5.1558013 | up | XM_001065506 | Sorl1   | 300652 |
| 5.672124  | up | XM_001070445 | Sort1   | 83576  |
| 8.544011  | up | XM_001062567 | Sos1    | 313845 |
| 10.878283 | up | XM_001068302 | Sox4    | 364712 |
| 7.639705  | up | NM_001024751 | Sox6    | 293165 |
| 6.590326  | up | NM_012655    | Sp1     | 24790  |
| 5.6038647 | up | NM_001014220 | Sp100   | 363269 |
| 2.002781  | up | NM_001034137 | Sp110   | 301570 |
| 4.648425  | up | NM_001012133 | Sp140   | 316580 |
| 20.301756 | up | XM_001079933 | Spag7   | 303260 |
| 8.84674   | up | XM_001081278 | Spag9   | 360600 |
| 370.45377 | up | NM_012656    | Sparc   | 24791  |
| 94.00192  | up | NM_012946    | Sparc11 | 25434  |
| 7.418442  | up | XM_001065741 | Spast   | 362700 |
| 2.5251698 | up | XM_001069059 | Spata5  | 361935 |
| 3.6481657 | up | NM_138862    | Spata7  | 192225 |
| 2.6424096 | up | NM_001014102 | Spats2l | 316426 |
| 21.85303  | up | XM_001066421 | Spcs2   | 293142 |
| 3.0088186 | up | XM_001058844 | Spcs3   | 680782 |
| 2.5197465 | up | XM_001058207 | Speg    | 363256 |
| 3.1238525 | up | XM_242139    | Spg11   | 311372 |
| 3.168377  | up | XM_215564    | Spg20   | 295053 |
| 16.244648 | up | NM_001006987 | Spg21   | 300791 |
| 2.474882  | up | NM_181388    | Spg7    | 353231 |
| 3.2267656 | up | NM_001012066 | Sphk2   | 308589 |
| 5.6859784 | up | NM_199087    | Spint2  | 292770 |
| 12.484652 | up | NM_171983    | Spna2   | 64159  |
| 4.9624047 | up | NM_138533    | Spon2   | 171569 |
| 87.52961  | up | XM_001072862 | Spop    | 287643 |
| 16.639465 | up | XM_001081083 | Sppl2a  | 311401 |
| 5.538901  | up | XM_001080325 | Sppl3   | 360822 |
| 3.6331797 | up | NM_001037765 | Spryd4  | 288772 |
| 4.774429  | up | XM_001058835 | Spsb3   | 302981 |
| 30.479889 | up | NM_001013130 | Sptbn1  | 305614 |
| 7.7687173 | up | XM_001053124 | Sptlc1  | 361213 |
| 3.125635  | up | NM_001037097 | Sptlc2  | 366697 |
| 8.188812  | up | XM_001080417 | Sqrdl   | 691966 |
| 177.9301  | up | NM_175843    | Sqstm1  | 113894 |
| 8.106929  | up | NM_183329    | Sra1    | 252891 |
| 3.1591947 | up | NM_001013990 | Srd5a3  | 305291 |



|            |    |              |          |        |
|------------|----|--------------|----------|--------|
| 6.727992   | up | XM_001075680 | Srebf1   | 78968  |
| 3.3977995  | up | XM_001058349 | Srgap2   | 360840 |
| 9.385821   | up | NM_020074    | Srgn     | 56782  |
| 20.219128  | up | XM_001079265 | Srl      | 302948 |
| 59.82435   | up | XM_001080727 | Srp14    | 296076 |
| 14.3006315 | up | XM_001060949 | Srp19    | 291685 |
| 3.795616   | up | XM_001066751 | Srp72    | 498351 |
| 3.0484786  | up | NM_001025726 | Srpk1    | 361811 |
| 11.509358  | up | XM_001059468 | Srpk2    | 296753 |
| 68.85554   | up | NM_001034150 | Srpr     | 315548 |
| 2.2195785  | up | NM_001013252 | Srprb    | 300965 |
| 4.3916287  | up | NM_198757    | Srr      | 303306 |
| 23.361647  | up | XM_001069368 | Srrm1    | 313620 |
| 6.23345    | up | XM_001073112 | Ss18     | 361295 |
| 12.192081  | up | NM_031119    | Ssb      | 81783  |
| 2.1027489  | up | NM_053358    | Ssbp3    | 84354  |
| 4.26452    | up | XM_001080435 | Ssh1     | 304580 |
| 2.55193    | up | XM_001080672 | Ssh2     | 303342 |
| 13.20514   | up | XM_001072559 | Ssna1    | 311802 |
| 9.048317   | up | NM_001008891 | Ssr1     | 361233 |
| 16.009014  | up | XM_001070197 | Ssr2     | 295235 |
| 4.3864164  | up | NM_031120    | Ssr3     | 81784  |
| 12.31243   | up | NM_017199    | Ssr4     | 29435  |
| 34.86875   | up | NM_031121    | Ssrp1    | 81785  |
| 4.1729527  | up | NM_175597    | Ssx2ip   | 308023 |
| 15.577959  | up | NM_031122    | St13     | 81800  |
| 3.5300026  | up | NM_031695    | St3gal2  | 64442  |
| 3.4128883  | up | NM_031697    | St3gal3  | 64445  |
| 2.2611957  | up | NM_203337    | St3gal4  | 363040 |
| 15.701031  | up | NM_031337    | St3gal5  | 83505  |
| 8.051219   | up | NM_207602    | St3gal6  | 304023 |
| 3.4821784  | up | NM_001007639 | St7l     | 295344 |
| 139.47339  | up | XM_001056439 | Stac3    | 362895 |
| 2.9829845  | up | XM_001067112 | Stag1    | 315958 |
| 8.715255   | up | XM_001059059 | Stag2    | 313304 |
| 14.290431  | up | XM_001067909 | Stam     | 498798 |
| 5.677537   | up | NM_138531    | Stambp   | 171565 |
| 3.865446   | up | NM_001025026 | Stap2    | 363334 |
| 9.1150675  | up | NM_001014229 | Stard3   | 363675 |
| 2.3454545  | up | NM_001008298 | Stard3nl | 291182 |
| 2.36085    | up | NM_001007627 | Stard6   | 291527 |
| 29.767834  | up | XM_238280    | Stard7   | 296128 |
| 5.8703547  | up | NM_032612    | Stat1    | 25124  |
| 5.282711   | up | NM_001011905 | Stat2    | 288774 |

|           |    |              |         |        |
|-----------|----|--------------|---------|--------|
| 28.379307 | up | NM_012747    | Stat3   | 25125  |
| 6.355762  | up | NM_022380    | Stat5b  | 25126  |
| 4.8822336 | up | NM_001044250 | Stat6   | 362896 |
| 2.7743556 | up | NM_053436    | Stau1   | 84496  |
| 3.6546478 | up | NM_001007149 | Stau2   | 171500 |
| 114.93144 | up | NM_001013988 | Stbd1   | 305234 |
| 9.186063  | up | NM_001044265 | Steap4  | 499991 |
| 5.6551495 | up | XM_001069624 | Stim1   | 361618 |
| 7.0046034 | up | XM_001053661 | Stim2   | 117087 |
| 34.2361   | up | NM_138911    | Stip1   | 192277 |
| 6.101223  | up | XM_001076821 | Stk11   | 314621 |
| 4.231417  | up | XM_237307    | Stk11ip | 301535 |
| 2.5846457 | up | NM_173142    | Stk16   | 286927 |
| 6.446534  | up | NM_184049    | Stk25   | 373542 |
| 2.1913497 | up | NM_031735    | Stk3    | 65189  |
| 4.4275956 | up | NM_001015025 | Stk38   | 361813 |
| 2.0158567 | up | NM_053440    | Stmn2   | 84510  |
| 7.544323  | up | NM_001011965 | Stom    | 296655 |
| 5.966874  | up | NM_182820    | Strada  | 303605 |
| 15.290141 | up | XM_001069230 | Stradb  | 501146 |
| 37.575413 | up | NM_001011969 | Strap   | 297699 |
| 3.2131739 | up | NM_053416    | Strbp   | 84476  |
| 2.1379578 | up | NM_019148    | Strn    | 29149  |
| 55.85312  | up | NM_001029897 | Strn3   | 114520 |
| 2.1744885 | up | XM_001074709 | Strn4   | 308392 |
| 8.898188  | up | NM_012661    | Sts     | 24800  |
| 6.358983  | up | XM_001061492 | Stt3a   | 500972 |
| 46.420593 | up | NM_001025625 | Stub1   | 287155 |
| 11.83967  | up | NM_001012151 | Stx18   | 360953 |
| 2.8746324 | up | NM_012748    | Stx2    | 25130  |
| 14.924291 | up | NM_031125    | Stx4    | 81803  |
| 3.1037025 | up | NM_031656    | Stx8    | 59074  |
| 3.181555  | up | NM_013038    | Stxbp1  | 25558  |
| 2.5814357 | up | NM_030843    | Stxbp5  | 81022  |
| 2.4898858 | up | XM_001070116 | Styx    | 689246 |
| 32.098236 | up | XM_001071843 | Sucla2  | 361071 |
| 16.813814 | up | NM_053752    | Suclg1  | 114597 |
| 22.087168 | up | XM_001064568 | Suclg2  | 362404 |
| 11.211712 | up | XM_001080131 | Suds3   | 360819 |
| 3.0242114 | up | XM_001073449 | Sugt1   | 290408 |
| 6.8800077 | up | NM_031834    | Sult1a1 | 83783  |
| 3.8764122 | up | NM_001025125 | Sumf2   | 360800 |
| 18.397665 | up | NM_001009672 | Sumo1   | 301442 |
| 2.8356776 | up | NM_001024295 | Sumo3   | 499417 |

|           |    |              |          |        |
|-----------|----|--------------|----------|--------|
| 14.924642 | up | NM_031127    | Suox     | 81805  |
| 3.787657  | up | XM_001075690 | Supt16h  | 305851 |
| 5.091207  | up | XM_001081172 | Supt4h1  | 287608 |
| 13.465006 | up | XM_001078198 | Supt5h   | 308472 |
| 21.412207 | up | XM_001080796 | Supt6h   | 303281 |
| 2.994279  | up | XM_001062292 | Supt7l   | 313905 |
| 2.6984596 | up | NM_172068    | Surf1    | 64463  |
| 20.143686 | up | NM_001033868 | Surf4    | 619346 |
| 9.361538  | up | NM_001015014 | Surf6    | 303076 |
| 3.384312  | up | XM_001079843 | Susd2    | 294335 |
| 2.0309434 | up | XM_001068585 | Suv420h1 | 361688 |
| 11.898235 | up | XM_001056293 | Svil     | 361256 |
| 30.462496 | up | NM_133417    | Syf2     | 170933 |
| 24.040035 | up | XM_001060926 | Sync     | 362606 |
| 2.2469416 | up | NM_001029909 | Syne1    | 499010 |
| 25.394108 | up | NM_053553    | Syngr2   | 89815  |
| 3.8829646 | up | XM_001073290 | Synj1    | 85238  |
| 2.1251729 | up | NM_032071    | Synj2    | 84018  |
| 18.314487 | up | NM_022599    | Synj2bp  | 64531  |
| 2.430151  | up | XM_001055657 | Synm     | 308709 |
| 14.736811 | up | XM_001074385 | Synpo2   | 499702 |
| 9.781865  | up | XM_001064648 | Synpo2l  | 305675 |
| 5.7941666 | up | NM_053419    | Synrg    | 84479  |
| 25.211777 | up | NM_001014263 | Sypl1    | 366595 |
| 9.483283  | up | XM_001071432 | Sypl2    | 362018 |
| 35.449776 | up | NM_001004415 | Tacc2    | 309025 |
| 4.4245806 | up | XM_001063180 | Tada1l   | 360874 |
| 4.974516  | up | XM_001063619 | Tada2b   | 289717 |
| 2.103353  | up | NM_001012141 | Tada2l   | 360581 |
| 2.2797585 | up | XM_001062309 | Tada3lb  | 291150 |
| 9.696742  | up | NM_001008350 | Taf11    | 309638 |
| 10.710846 | up | XM_001065010 | Taf12    | 682902 |
| 2.7234259 | up | XM_001071074 | Taf13    | 310784 |
| 4.979008  | up | XM_001074480 | Taf1b    | 690450 |
| 3.6835902 | up | XM_001066741 | Taf2     | 170844 |
| 3.944533  | up | NM_001044225 | Taf6     | 288533 |
| 12.107426 | up | NM_001037310 | Taf9     | 373541 |
| 3.087004  | up | NM_133615    | Taf9b    | 171152 |
| 22.591434 | up | NM_031549    | Tagln    | 25123  |
| 11.464425 | up | NM_031811    | Taldo1   | 83688  |
| 10.319441 | up | NM_145788    | Tank     | 252961 |
| 7.5373445 | up | NM_032055    | Tap1     | 24811  |
| 2.795602  | up | NM_033098    | Tapbp    | 25217  |
| 15.705043 | up | NM_001034941 | Tarbp2   | 363006 |

|           |    |              |          |        |
|-----------|----|--------------|----------|--------|
| 14.017553 | up | NM_001011979 | Tardbp   | 298648 |
| 23.763578 | up | NM_001006976 | Tars     | 294810 |
| 2.558109  | up | NM_001014040 | Tars2    | 310672 |
| 13.648179 | up | NM_001014020 | Tarsl2   | 308701 |
| 6.8122406 | up | XM_001078895 | Tatdn2   | 500295 |
| 7.6736617 | up | NM_001025748 | Taz      | 363521 |
| 4.5656753 | up | XM_001078373 | Tbc1d10b | 365372 |
| 2.9895184 | up | NM_001012152 | Tbc1d14  | 360956 |
| 105.91305 | up | XM_001077952 | Tbc1d17  | 292886 |
| 2.8607335 | up | NM_001004281 | Tbc1d20  | 362237 |
| 10.564489 | up | XM_001060935 | Tbc1d23  | 304019 |
| 3.7716105 | up | XM_001063148 | Tbc1d25  | 302552 |
| 6.5188437 | up | XM_001055741 | Tbc1d8   | 680133 |
| 7.0257726 | up | XM_001070650 | Tbc1d9b  | 360520 |
| 3.6229105 | up | NM_001013245 | Tbca     | 366995 |
| 8.821481  | up | NM_001040180 | Tbcb     | 292777 |
| 3.7846437 | up | NM_001012016 | Tbccd1   | 303830 |
| 12.411101 | up | NM_001012161 | Tbce     | 361255 |
| 4.433843  | up | XM_001057805 | Tbl1x    | 302711 |
| 2.343786  | up | XM_001056572 | Tbl1xr1  | 365755 |
| 4.3944936 | up | NM_001008277 | Tbl3     | 287120 |
| 5.4037876 | up | NM_001004198 | Tbp      | 117526 |
| 2.7430067 | up | XM_001069243 | Tbpl1    | 689030 |
| 7.249208  | up | NM_001009344 | Tbrg1    | 300521 |
| 5.131977  | up | NM_001012154 | Tbrg4    | 360977 |
| 27.890188 | up | XM_001062167 | Tbx15    | 295315 |
| 4.0302596 | up | NM_001025735 | Tcea1    | 362479 |
| 16.791462 | up | NM_001015008 | Tcea3    | 298559 |
| 2.132263  | up | NM_001009675 | Tceal1   | 302593 |
| 23.70095  | up | NM_001014275 | Tceal8   | 367909 |
| 13.472752 | up | NM_017103    | Tceb3    | 25562  |
| 2.4163644 | up | XM_001068365 | Tcerg1   | 307474 |
| 4.1489377 | up | NM_013176    | Tcf12    | 25720  |
| 2.399799  | up | XM_001077683 | Tcf20    | 366964 |
| 2.4137049 | up | XM_001065059 | Tcf3     | 312451 |
| 12.432598 | up | NM_053369    | Tcf4     | 84382  |
| 9.843738  | up | XM_001063604 | Tcfcp2   | 315309 |
| 4.2247    | up | XM_222232    | Tchp     | 304547 |
| 4.4803305 | up | NM_199089    | Tcirg1   | 293650 |
| 8.529446  | up | NM_022534    | Tcn2     | 64365  |
| 43.992077 | up | NM_012670    | Tcp1     | 24818  |
| 2.4428337 | up | XM_001079577 | Tcp1111  | 499846 |
| 5.2861276 | up | NM_001017458 | Tcp1112  | 314683 |
| 7.9822245 | up | NM_053729    | Tdg      | 114521 |

|            |    |              |         |        |
|------------|----|--------------|---------|--------|
| 7.148851   | up | NM_138871    | Tdrd7   | 85425  |
| 2.9440258  | up | XM_001069278 | Tead1   | 361630 |
| 2.6071842  | up | XM_001069188 | Tec     | 84492  |
| 39.179226  | up | NM_138549    | Tecr    | 191576 |
| 5.5353613  | up | NM_019194    | Tef     | 29362  |
| 9.790249   | up | XM_001054185 | Tek     | 89804  |
| 11.444727  | up | XM_001066149 | Tenc1   | 315326 |
| 5.5882444  | up | NM_022591    | Tep1    | 64523  |
| 19.43254   | up | NM_001013143 | Terf2ip | 307861 |
| 2.0164244  | up | NM_001039344 | Tes     | 500040 |
| 8.934967   | up | NM_031578    | Tesk1   | 29460  |
| 7.134273   | up | XM_001077411 | Tet2    | 310859 |
| 8.375706   | up | XM_001054011 | Tex10   | 298065 |
| 10.16118   | up | XM_001069235 | Tex2    | 303611 |
| 5.676126   | up | NM_001017537 | Tex261  | 297392 |
| 2.7977042  | up | NM_001013110 | Tf      | 24825  |
| 13.418699  | up | NM_031326    | Tfam    | 83474  |
| 2.5103798  | up | NM_181474    | Tfb1m   | 308140 |
| 12.710503  | up | NM_001008293 | Tfb2m   | 289307 |
| 36.028976  | up | NM_001012144 | Tfg     | 360709 |
| 7.506134   | up | NM_001008291 | Tfip11  | 288718 |
| 5.124047   | up | NM_017200    | Tfpi    | 29436  |
| 7.3905373  | up | NM_138870    | Tfpt    | 85423  |
| 5.6238832  | up | XM_001072774 | Tfrc    | 64678  |
| 2.3606458  | up | XM_001078278 | Tgds    | 306164 |
| 3.1231596  | up | NM_021578    | Tgfb1   | 59086  |
| 4.8502     | up | XM_001077389 | Tgfb1i1 | 84574  |
| 13.911503  | up | NM_031131    | Tgfb2   | 81809  |
| 3.8347833  | up | XM_001069069 | Tgs1    | 312947 |
| 3.8025498  | up | XM_001060686 | Thada   | 313865 |
| 7.5894833  | up | XM_001075997 | Thap3   | 362667 |
| 5.8046765  | up | NM_001005564 | Thap4   | 363291 |
| 3.8968937  | up | NM_031771    | Thbd    | 83580  |
| 3.471169   | up | NM_001013062 | Thbs1   | 445442 |
| 21.910997  | up | XM_001066338 | Thbs4   | 29220  |
| 2.3835042  | up | NM_001025017 | Them4   | 361992 |
| 2.777633   | up | NM_001025035 | Thnsl1  | 498805 |
| 5.151883   | up | NM_001009658 | Thnsl2  | 297332 |
| 2.7449183  | up | XM_001058768 | Thoc2   | 313308 |
| 2.3132756  | up | XM_001068440 | Thoc3   | 290519 |
| 22.16199   | up | XM_001075100 | Thoc4   | 690585 |
| 8.364537   | up | NM_001012153 | Thoc5   | 360972 |
| 11.824297  | up | NM_024384    | Thoc6   | 79227  |
| 12.9194355 | up | XM_223828    | Thoc7   | 305714 |

|           |    |              |          |        |
|-----------|----|--------------|----------|--------|
| 2.9486523 | up | NM_172075    | Thop1    | 64517  |
| 5.972458  | up | NM_001017960 | Thra     | 81812  |
| 4.5005646 | up | NM_001009693 | Thrap3   | 313591 |
| 5.821069  | up | NM_012703    | Thrsp    | 25357  |
| 2.3374856 | up | XM_001078607 | Thumpd3  | 500288 |
| 4.862532  | up | NM_001013193 | Tial1    | 361655 |
| 7.084137  | up | XM_001069541 | Tie1     | 89806  |
| 6.718492  | up | NM_172074    | Timm10   | 64464  |
| 40.98484  | up | NM_145781    | Timm13   | 252928 |
| 2.654943  | up | NM_019351    | Timm17a  | 54311  |
| 17.28575  | up | XM_001079918 | Timm17a1 | 500655 |
| 11.015962 | up | XM_001063717 | Timm17b  | 317374 |
| 11.964027 | up | NM_019352    | Timm23   | 54312  |
| 3.7005744 | up | NM_053370    | Timm8a1  | 84383  |
| 60.684067 | up | NM_022541    | Timm8b   | 64372  |
| 3.6118462 | up | XM_001072892 | Timm9    | 171139 |
| 2.4513552 | up | NM_053819    | Timp1    | 116510 |
| 6.5505304 | up | NM_021989    | Timp2    | 29543  |
| 11.962485 | up | NM_012886    | Timp3    | 25358  |
| 6.7249618 | up | NM_053582    | Tinag1   | 94174  |
| 3.186458  | up | NM_001006962 | Tinf2    | 290232 |
| 2.758118  | up | NM_001025287 | Tipin    | 363076 |
| 2.0614865 | up | XM_341145    | Tiprl    | 360869 |
| 4.826606  | up | XM_001063874 | Tjap1    | 316233 |
| 4.4870763 | up | XM_001058833 | Tjp1     | 292994 |
| 3.6992574 | up | NM_053773    | Tjp2     | 115769 |
| 4.6211243 | up | XM_001066887 | Tle1     | 362533 |
| 4.1548343 | up | NM_019141    | Tle4     | 25565  |
| 6.688349  | up | XM_001059845 | Tlk1     | 311118 |
| 3.5559616 | up | XM_001067052 | Tlk2     | 303592 |
| 8.421889  | up | XM_001053379 | Tln1     | 313494 |
| 2.19182   | up | XM_001056519 | Tln2     | 315776 |
| 2.189573  | up | NM_198791    | Tlr3     | 364594 |
| 18.892614 | up | XM_001059680 | Tm2d1    | 362545 |
| 11.605636 | up | XM_001056632 | Tm2d3    | 292995 |
| 2.1873083 | up | XM_001060042 | Tm4sf1   | 295061 |
| 2.4329147 | up | XM_001067588 | Tm6sf1   | 361600 |
| 11.123204 | up | NM_001012155 | Tm9sf1   | 361043 |
| 7.653879  | up | NM_001005554 | Tm9sf2   | 306197 |
| 2.2960315 | up | XM_220013    | Tm9sf3   | 309475 |
| 2.671133  | up | NM_001025649 | Tm9sf4   | 296279 |
| 3.9780033 | up | NM_001007713 | Tmbim1   | 316516 |
| 7.778121  | up | NM_199116    | Tmbim4   | 362884 |
| 139.24174 | up | NM_019381    | Tmbim6   | 24822  |

|            |    |              |          |        |
|------------|----|--------------|----------|--------|
| 11.630592  | up | XM_001054467 | Tmcc1    | 312654 |
| 4.823231   | up | XM_001059693 | Tmcc2    | 305095 |
| 37.184242  | up | NM_001009631 | Tmco1    | 289196 |
| 33.076393  | up | XM_001075325 | Tmco3    | 306607 |
| 3.2398546  | up | NM_001034949 | Tmco4    | 500573 |
| 15.578094  | up | XM_001065172 | Tmco6    | 291661 |
| 3.3402088  | up | NM_001013432 | Tmed1    | 315461 |
| 13.280969  | up | NM_053467    | Tmed10   | 84599  |
| 123.172485 | up | NM_031722    | Tmed2    | 65165  |
| 4.822369   | up | XM_001070563 | Tmed4    | 305502 |
| 3.1559396  | up | NM_001007619 | Tmed5    | 289883 |
| 38.987255  | up | NM_001017479 | Tmem100  | 497979 |
| 15.79592   | up | XM_001081505 | Tmem101  | 303564 |
| 2.2407267  | up | XM_001075724 | Tmem103  | 363150 |
| 8.155112   | up | NM_001004267 | Tmem106b | 312132 |
| 2.0789104  | up | XM_001069716 | Tmem108  | 300967 |
| 6.4904647  | up | NM_001007736 | Tmem109  | 361732 |
| 5.9036427  | up | XM_001076426 | Tmem11   | 303196 |
| 2.2403111  | up | NM_198774    | Tmem110  | 361110 |
| 70.19185   | up | NM_001008355 | Tmem111  | 312640 |
| 14.044705  | up | XM_001074283 | Tmem115  | 363136 |
| 2.3441873  | up | XM_001074467 | Tmem116  | 690442 |
| 13.012756  | up | XM_576330    | Tmem117  | 500921 |
| 5.993284   | up | NM_001010945 | Tmem120a | 288591 |
| 5.369462   | up | NM_001014205 | Tmem123  | 363013 |
| 6.8517094  | up | NM_001011557 | Tmem126a | 293113 |
| 6.748925   | up | XM_001062219 | Tmem126b | 293114 |
| 8.07946    | up | XM_001062482 | Tmem128  | 360952 |
| 9.722207   | up | XM_001056771 | Tmem131  | 316335 |
| 10.265925  | up | NM_001078647 | Tmem134  | 361695 |
| 3.4154353  | up | NM_001013896 | Tmem135  | 293098 |
| 30.341251  | up | NM_001009709 | Tmem140  | 362334 |
| 3.5580919  | up | XM_001074131 | Tmem141  | 499755 |
| 2.1732857  | up | XM_001063426 | Tmem144  | 361968 |
| 30.071571  | up | NM_001038494 | Tmem147  | 292792 |
| 64.07969   | up | NM_134395    | Tmem14c  | 171432 |
| 5.442344   | up | NM_139107    | Tmem150a | 245966 |
| 3.3921835  | up | NM_001024802 | Tmem165  | 364137 |
| 2.7851806  | up | XM_001071753 | Tmem167b | 499690 |
| 2.9930074  | up | NM_001013991 | Tmem175  | 305623 |
| 13.537005  | up | NM_001039008 | Tmem176a | 297077 |
| 11.77861   | up | NM_134390    | Tmem176b | 171411 |
| 4.296761   | up | NM_001037776 | Tmem177  | 304735 |
| 3.9488144  | up | XM_001067532 | Tmem181  | 502228 |

|           |    |              |          |        |
|-----------|----|--------------|----------|--------|
| 13.254889 | up | XM_001059514 | Tmem182  | 501129 |
| 2.314724  | up | NM_001013871 | Tmem183a | 289034 |
| 8.861563  | up | NM_178330    | Tmem184c | 291946 |
| 2.3258088 | up | XM_001053713 | Tmem185a | 309357 |
| 29.037449 | up | XM_001053834 | Tmem185b | 304731 |
| 7.3049216 | up | XM_001063368 | Tmem188  | 291914 |
| 26.329903 | up | XM_342588    | Tmem189  | 362278 |
| 3.9584687 | up | NM_199098    | Tmem19   | 299800 |
| 3.5639935 | up | NM_001014141 | Tmem192  | 361137 |
| 24.15648  | up | NM_001024992 | Tmem199  | 303332 |
| 2.012429  | up | XM_001079816 | Tmem2    | 309400 |
| 3.0829306 | up | XM_220029    | Tmem20   | 294072 |
| 6.8589735 | up | XM_001077527 | Tmem205  | 300441 |
| 4.1639037 | up | XM_001075578 | Tmem208  | 291963 |
| 2.7027378 | up | NM_001014195 | Tmem214  | 362711 |
| 6.3054485 | up | NM_001008325 | Tmem218  | 300516 |
| 5.5449986 | up | XM_001080074 | Tmem219  | 308986 |
| 2.0067964 | up | XM_001078792 | Tmem220  | 287405 |
| 4.319412  | up | XM_001066468 | Tmem222  | 313021 |
| 2.3391147 | up | XM_001078413 | Tmem229b | 503035 |
| 21.110767 | up | NM_001004248 | Tmem30a  | 300857 |
| 5.9592547 | up | NM_001034198 | Tmem33   | 59303  |
| 93.973526 | up | XM_001063213 | Tmem38a  | 306327 |
| 140.70901 | up | NM_001014191 | Tmem38b  | 362521 |
| 8.109469  | up | NM_001013865 | Tmem39a  | 288092 |
| 11.593019 | up | NM_001012358 | Tmem41b  | 361626 |
| 2.6340168 | up | XM_001060274 | Tmem47   | 501569 |
| 14.93191  | up | NM_138839    | Tmem49   | 192129 |
| 3.9921927 | up | NM_001024759 | Tmem5    | 299841 |
| 48.703392 | up | XM_001067840 | Tmem50a  | 298552 |
| 15.005427 | up | NM_001024900 | Tmem55a  | 362490 |
| 10.298142 | up | NM_001014233 | Tmem55b  | 364298 |
| 3.6481526 | up | NM_001025699 | Tmem57   | 313618 |
| 13.178299 | up | XM_001063081 | Tmem60   | 296761 |
| 5.089363  | up | XM_001080922 | Tmem62   | 311350 |
| 83.50204  | up | NM_001004213 | Tmem66   | 290796 |
| 2.1017387 | up | XM_001053339 | Tmem67   | 313067 |
| 3.721856  | up | XM_001062611 | Tmem70   | 500384 |
| 4.3899193 | up | NM_001017455 | Tmem80   | 309109 |
| 14.148531 | up | XM_001074437 | Tmem85   | 296049 |
| 17.584198 | up | XM_345422    | Tmem87a  | 366170 |
| 2.517906  | up | XM_001081122 | Tmem87b  | 362212 |
| 3.0623999 | up | XM_001079371 | Tmem88   | 497936 |
| 6.8172317 | up | XM_001063617 | Tmem9    | 289046 |



|           |    |              |           |        |
|-----------|----|--------------|-----------|--------|
| 28.995749 | up | XM_001080240 | Tmem93    | 287477 |
| 2.6638207 | up | NM_001007672 | Tmem98    | 303356 |
| 14.734984 | up | XM_001073254 | Tmem9b    | 293415 |
| 12.483091 | up | NM_053671    | Tmf1      | 114206 |
| 13.751808 | up | NM_013044    | Tmod1     | 25566  |
| 3.5333283 | up | NM_001011997 | Tmod3     | 300838 |
| 172.35704 | up | XM_001054854 | Tmod4     | 295261 |
| 5.893008  | up | NM_012887    | Tmpo      | 25359  |
| 28.860647 | up | NM_031136    | Tmsb4x    | 81814  |
| 6.3735757 | up | NM_001031651 | Tmub2     | 303567 |
| 19.59833  | up | NM_001007643 | Tmx2      | 295701 |
| 2.6304166 | up | XM_001081259 | Tmx4      | 296182 |
| 4.1251454 | up | NM_001014039 | Tnfaip8l2 | 310663 |
| 3.284269  | up | NM_181086    | Tnfrsf12a | 302965 |
| 8.011082  | up | NM_013091    | Tnfrsf1a  | 25625  |
| 2.478551  | up | XM_001065930 | Tnfrsf26  | 361685 |
| 3.754494  | up | NM_145681    | Tnfsf10   | 246775 |
| 3.744889  | up | NM_001001513 | Tnfsf12   | 360548 |
| 2.9482703 | up | NM_001009623 | Tnfsf13   | 287437 |
| 3.0825331 | up | XM_001057689 | Tnik      | 294917 |
| 26.730883 | up | XM_001073849 | Tnip1     | 363599 |
| 2.6061065 | up | NM_001024771 | Tnip2     | 305451 |
| 4.0047264 | up | XM_001059294 | Tnks      | 290794 |
| 8.597695  | up | XM_001080123 | Tnks2     | 309512 |
| 35.319096 | up | NM_001034105 | Tnnc1     | 290561 |
| 17.569952 | up | NM_001037351 | Tnnc2     | 296369 |
| 105.68704 | up | NM_017185    | Tnni2     | 29389  |
| 188.97446 | up | NM_134388    | Tnnt1     | 171409 |
| 2.85216   | up | NM_012676    | Tnnt2     | 24837  |
| 418.34006 | up | NM_031532    | Tnnt3     | 24838  |
| 5.778236  | up | XM_001070389 | Tnpo1     | 309126 |
| 2.116883  | up | XM_001077084 | Tnrc6b    | 192178 |
| 4.1484604 | up | XM_001078761 | Toag1     | 363169 |
| 6.8396025 | up | NM_133317    | Tob1      | 170842 |
| 5.344343  | up | NM_001007146 | Tob2      | 315159 |
| 5.184664  | up | XM_001071317 | Toe1      | 298443 |
| 13.955829 | up | NM_001008365 | Tom1      | 361370 |
| 14.961368 | up | NM_152935    | Tomm20    | 266601 |
| 2.8052802 | up | NM_212514    | Tomm22    | 300075 |
| 23.00996  | up | NM_001044244 | Tomm34    | 311621 |
| 2.0860832 | up | NM_212520    | Tomm40    | 308416 |
| 3.9927206 | up | XM_001055588 | Tomm5     | 680080 |
| 13.840324 | up | NM_212519    | Tomm70a   | 304017 |
| 7.261145  | up | NM_022615    | Top1      | 64550  |

|            |    |              |          |        |
|------------|----|--------------|----------|--------|
| 3.8783395  | up | NM_001002798 | Top1mt   | 300029 |
| 7.5755043  | up | XM_001067804 | Top3b    | 287930 |
| 3.7933147  | up | XM_001072207 | Topbp1   | 315969 |
| 4.9382567  | up | NM_001007744 | Tor2a    | 362112 |
| 6.581547   | up | NM_001009683 | Tor3a    | 304884 |
| 9.713461   | up | NM_173324    | Tox4     | 286990 |
| 3.7208562  | up | NM_030989    | Tp53     | 24842  |
| 4.926656   | up | XM_001080798 | Tp53i13  | 287550 |
| 3.2805448  | up | NM_181084    | Tp53inp1 | 297822 |
| 13.829742  | up | NM_022922    | Tpi1     | 24849  |
| 54.747787  | up | NM_001034068 | Tpm1     | 24851  |
| 121.39538  | up | NM_001024345 | Tpm2     | 500450 |
| 5.7038846  | up | NM_012678    | Tpm4     | 24852  |
| 11.641014  | up | NM_031357    | Tpp1     | 83534  |
| 9.897784   | up | NM_031137    | Tpp2     | 81815  |
| 10.677362  | up | NM_001009639 | Tppp3    | 291966 |
| 2.5684092  | up | XM_001070158 | Tpr      | 304862 |
| 4.897536   | up | NM_001013926 | Tprkb    | 297411 |
| 2.0278895  | up | NM_001011903 | Tpst1    | 288617 |
| 155.87791  | up | NM_053867    | Tpt1     | 116646 |
| 3.3347583  | up | NM_057119    | Tra2b    | 117259 |
| 13.999273  | up | XM_001054533 | Trabd    | 300142 |
| 82.8039    | up | XM_001077727 | Traf2    | 311786 |
| 2.1769636  | up | NM_001014132 | Traf3ip3 | 360900 |
| 9.811643   | up | XM_001055375 | Traf7    | 360491 |
| 2.6622856  | up | XM_001076427 | Trafd1   | 114635 |
| 2.1915221  | up | XM_001077998 | Trak1    | 316085 |
| 3.9250085  | up | NM_133560    | Trak2    | 171086 |
| 37.271877  | up | NM_001007701 | Tram1    | 312903 |
| 16.45892   | up | NM_001039001 | Trap1    | 287069 |
| 9.242856   | up | NM_001039378 | Trappc1  | 287427 |
| 4.2548237  | up | NM_001024965 | Trappc2  | 501550 |
| 6.137295   | up | XM_001077701 | Trappc2l | 292074 |
| 3.2982738  | up | XM_001063935 | Trappc5  | 363858 |
| 27.378826  | up | XM_001079724 | Trappc6b | 299075 |
| 4.835637   | up | XM_001068491 | Trappc9  | 315059 |
| 120.099655 | up | NM_021666    | Trdn     | 59299  |
| 4.3297997  | up | NM_001024989 | Trex1    | 1E+08  |
| 12.555313  | up | XM_001077518 | Triap1   | 691278 |
| 3.130157   | up | NM_023985    | Trib1    | 78969  |
| 2.674202   | up | XM_001068999 | Trib2    | 313974 |
| 2.128554   | up | NM_144755    | Trib3    | 246273 |
| 5.9130945  | up | XM_001078237 | Trim16   | 303214 |
| 2.5555906  | up | XM_001064021 | Trim23   | 81002  |

|            |    |              |         |        |
|------------|----|--------------|---------|--------|
| 3.0257592  | up | NM_001009536 | Trim25  | 494338 |
| 4.244451   | up | XM_001059726 | Trim27  | 291171 |
| 12.185571  | up | XM_001062234 | Trim28  | 116698 |
| 12.660173  | up | XM_001081108 | Trim37  | 360592 |
| 2.8938756  | up | NM_213562    | Trim39  | 309591 |
| 4.423178   | up | XM_001069403 | Trim41  | 303088 |
| 2.8984416  | up | NM_001014023 | Trim5   | 308906 |
| 296.32816  | up | NM_001013217 | Trim54  | 362708 |
| 3.5632997  | up | NM_001012218 | Trim55  | 365751 |
| 156.99225  | up | NM_080903    | Trim63  | 140939 |
| 14.830323  | up | NM_001077675 | Trim72  | 365377 |
| 5.1940784  | up | XM_001058824 | Trio    | 310192 |
| 42.844517  | up | NM_053920    | Trip10  | 116717 |
| 40.342632  | up | NM_001031659 | Trip12  | 316575 |
| 8.848386   | up | XM_001054252 | Trit1   | 362586 |
| 5.9292774  | up | NM_001013870 | Trmt1   | 288914 |
| 3.7055752  | up | XM_001078327 | Trmu    | 362976 |
| 8.117963   | up | NM_001024261 | Trnt1   | 312616 |
| 6.133468   | up | XM_001076425 | Trpt1   | 293704 |
| 6.0662937  | up | XM_001071336 | Trrap   | 288471 |
| 6.930634   | up | NM_001012173 | Trub1   | 361775 |
| 14.632943  | up | NM_001014257 | Trub2   | 366012 |
| 3.1204925  | up | NM_021854    | Tsc1    | 60445  |
| 41.865753  | up | NM_012680    | Tsc2    | 24855  |
| 46.304993  | up | NM_031345    | Tsc22d3 | 83514  |
| 34.402958  | up | XM_001066199 | Tsen15  | 289083 |
| 3.7568872  | up | XM_001074043 | Tsen54  | 690308 |
| 21.374758  | up | NM_181628    | Tsg101  | 292925 |
| 10.481195  | up | XM_001060440 | Tshz1   | 307217 |
| 6.2158923  | up | NM_021762    | Tsn     | 60381  |
| 8.85503    | up | NM_022262    | Tsnax   | 64028  |
| 21.434511  | up | NM_001015026 | Tspan12 | 362326 |
| 102.738335 | up | NM_001013244 | Tspan13 | 366602 |
| 2.4828563  | up | XM_001067025 | Tspan14 | 306324 |
| 8.5229225  | up | NM_001005547 | Tspan3  | 300733 |
| 17.044144  | up | NM_001008378 | Tspan31 | 362890 |
| 6.676943   | up | XM_001062106 | Tspan33 | 500065 |
| 3.2068717  | up | NM_001013070 | Tspan4  | 293627 |
| 4.573798   | up | XM_001067945 | Tspan6  | 302313 |
| 26.60913   | up | XM_001062155 | Tspan7  | 363447 |
| 27.59086   | up | NM_133526    | Tspan8  | 171048 |
| 2.7211692  | up | XM_001064403 | Tspyl2  | 302612 |
| 9.762722   | up | NM_001012192 | Tssc1   | 362721 |
| 9.722895   | up | NM_001013194 | Tssc4   | 361682 |

|           |    |              |         |        |
|-----------|----|--------------|---------|--------|
| 3.6986864 | up | NM_012808    | Tst     | 25274  |
| 49.289894 | up | XM_001070202 | Tsta3   | 300036 |
| 6.521591  | up | XM_001071828 | Tstd2   | 362514 |
| 46.027588 | up | NM_001005529 | Ttc1    | 287208 |
| 6.744189  | up | XM_001054055 | Ttc13   | 292095 |
| 3.461385  | up | XM_001071807 | Ttc15   | 314013 |
| 11.727962 | up | XM_230313    | Ttc17   | 311224 |
| 2.065907  | up | XM_001064202 | Ttc18   | 361006 |
| 4.3543878 | up | NM_001025681 | Ttc23   | 308708 |
| 8.258255  | up | XM_001065384 | Ttc27   | 298782 |
| 5.125195  | up | XM_001054505 | Ttc3    | 360702 |
| 15.541364 | up | XM_001054997 | Ttc33   | 294774 |
| 10.029926 | up | XM_001062644 | Ttc35   | 362905 |
| 2.894199  | up | XM_001059136 | Ttc37   | 294595 |
| 11.356069 | up | XM_001064941 | Ttc7b   | 362768 |
| 5.529614  | up | XM_001054586 | Ttc9    | 500689 |
| 2.3781037 | up | XM_001079280 | Ttf1    | 499766 |
| 2.5821514 | up | NM_138536    | Ttl     | 171572 |
| 2.9168248 | up | NM_001012200 | Ttl1    | 362969 |
| 2.4875777 | up | XM_001077354 | Ttl7    | 310982 |
| 582.9465  | up | XM_001065955 | Ttn     | 84015  |
| 10.717715 | up | NM_022298    | Tuba1a  | 64158  |
| 20.091497 | up | NM_001044270 | Tuba1b  | 500929 |
| 15.986351 | up | NM_001011995 | Tuba1c  | 300218 |
| 2.4893675 | up | NM_001040008 | Tuba3a  | 500319 |
| 285.4124  | up | NM_001007004 | Tuba4a  | 316531 |
| 268.39438 | up | NM_001024339 | Tuba8   | 500377 |
| 10.73573  | up | XM_001060757 | Tubb2a  | 498736 |
| 2.075595  | up | NM_001013886 | Tubb2b  | 291081 |
| 43.79253  | up | NM_199094    | Tubb2c  | 296554 |
| 122.14458 | up | NM_173102    | Tubb5   | 29214  |
| 261.6368  | up | NM_001025675 | Tubb6   | 307351 |
| 23.14864  | up | NM_145778    | Tubg1   | 252921 |
| 12.417137 | up | XM_001056506 | Tubgcp2 | 309098 |
| 4.9152393 | up | XM_001053658 | Tubgcp5 | 308663 |
| 2.3473344 | up | XM_001054588 | Tubgcp6 | 362980 |
| 13.129246 | up | XM_001077188 | Tufm    | 293481 |
| 2.8292835 | up | NM_001004212 | Tusc3   | 290783 |
| 2.2641804 | up | NM_001025744 | Tusc4   | 363138 |
| 5.321626  | up | NM_001033901 | Tut1    | 499314 |
| 3.804599  | up | NM_001008521 | Twf1    | 315265 |
| 2.136334  | up | XM_001076417 | Twistnb | 362728 |
| 3.2203686 | up | XM_001072466 | Twsg1   | 363294 |
| 20.009699 | up | XM_001072039 | Txlnb   | 308622 |

|           |    |              |         |        |
|-----------|----|--------------|---------|--------|
| 189.49178 | up | NM_053800    | Txn1    | 116484 |
| 16.665901 | up | NM_053331    | Txn2    | 79462  |
| 3.1466885 | up | XM_001072487 | Txndc16 | 361025 |
| 2.1355143 | up | XM_001080157 | Txndc17 | 287474 |
| 56.055073 | up | NM_001008767 | Txnip   | 117514 |
| 86.178894 | up | NM_080887    | Txn11   | 140922 |
| 5.2290645 | up | NM_001013891 | Txn14b  | 292008 |
| 10.545279 | up | NM_031614    | Txnrd1  | 58819  |
| 2.2573106 | up | NM_022584    | Txnrd2  | 50551  |
| 5.0396633 | up | XM_216204    | Txnrd3  | 297437 |
| 11.464327 | up | XM_001078133 | Tyw1    | 304423 |
| 4.703652  | up | XM_001080203 | Tyw3    | 499731 |
| 11.309626 | up | NM_001008775 | U2af114 | 361542 |
| 3.8559334 | up | XM_001077658 | U2af2   | 308335 |
| 20.180084 | up | XM_001076929 | Uba2    | 308508 |
| 11.898471 | up | NM_057205    | Uba3    | 117553 |
| 23.778742 | up | NM_001009669 | Uba5    | 300968 |
| 3.6289577 | up | NM_031687    | Uba52   | 64156  |
| 2.072887  | up | XM_001074883 | Uba6    | 305268 |
| 3.2582521 | up | XM_001074704 | Uba7    | 301000 |
| 59.128654 | up | NM_001007742 | Ubac1   | 362087 |
| 9.624087  | up | NM_001034937 | Ubac2   | 361094 |
| 2.500428  | up | NM_001012190 | Ubap1   | 362502 |
| 95.750854 | up | XM_001068128 | Ubap2   | 313169 |
| 11.249625 | up | NM_138895    | Ubb     | 192255 |
| 21.38745  | up | NM_017314    | Ubc     | 50522  |
| 5.2269526 | up | NM_001013933 | Ube2a   | 298317 |
| 44.947117 | up | NM_031138    | Ube2b   | 81816  |
| 9.665915  | up | XM_342125    | Ube2d1  | 361831 |
| 20.177017 | up | NM_001037292 | Ube2d2  | 641452 |
| 193.99959 | up | NM_031237    | Ube2d3  | 81920  |
| 2.4828422 | up | NM_001047857 | Ube2e3  | 295686 |
| 3.3760533 | up | NM_001008381 | Ube2f   | 363284 |
| 8.8041725 | up | NM_022690    | Ube2g1  | 64631  |
| 69.563255 | up | XM_001079504 | Ube2g2  | 294331 |
| 62.506725 | up | XM_216362    | Ube2j1  | 297961 |
| 22.006174 | up | NM_001007655 | Ube2j2  | 298689 |
| 7.603584  | up | XM_001071289 | Ube2k   | 289623 |
| 23.486403 | up | XM_001067198 | Ube2l3  | 363836 |
| 16.551983 | up | XM_001062179 | Ube2m   | 361509 |
| 10.810065 | up | XM_001074719 | Ube2q1  | 295252 |
| 6.641257  | up | XM_001072896 | Ube2q2  | 363065 |
| 5.347789  | up | XM_001071810 | Ube2s   | 292588 |
| 5.284482  | up | NM_001037643 | Ube2z   | 303478 |

|           |    |              |           |        |
|-----------|----|--------------|-----------|--------|
| 5.110038  | up | XM_001055915 | Ube3a     | 361585 |
| 6.10836   | up | XM_001055148 | Ube3c     | 362294 |
| 15.755323 | up | NM_207610    | Ube4a     | 315608 |
| 6.7016835 | up | XM_001075491 | Ube4b     | 298652 |
| 37.94907  | up | NM_001015030 | Ubl3      | 363869 |
| 3.4084492 | up | XM_001055202 | Ubl4      | 293864 |
| 6.086616  | up | NM_001048243 | Ubl5      | 500954 |
| 2.2648458 | up | XM_001079088 | Ubn1      | 302935 |
| 3.931021  | up | XM_001066467 | Ubn2      | 312248 |
| 4.182078  | up | XM_001076644 | Ubp1      | 301038 |
| 17.919718 | up | NM_053747    | Ubqln1    | 114590 |
| 6.404967  | up | XM_001061090 | Ubqln2    | 317396 |
| 25.416704 | up | XM_001074121 | Ubqln4    | 310633 |
| 57.23791  | up | NM_001039026 | Ubr4      | 313658 |
| 18.428228 | up | XM_001061308 | Ubr5      | 117060 |
| 7.5413837 | up | NM_001007705 | Ubr7      | 314399 |
| 2.543485  | up | XM_001081508 | Ubtf      | 25574  |
| 32.088    | up | NM_001034829 | Ubxn1     | 293719 |
| 12.835782 | up | NM_001012025 | Ubxn4     | 304766 |
| 49.5367   | up | XM_001059416 | Ubxn6     | 363332 |
| 3.8510184 | up | XM_001059749 | Ubxn8     | 290802 |
| 10.191329 | up | NM_001012149 | Uchl5     | 360853 |
| 5.2817736 | up | XM_001078114 | Uck1      | 311864 |
| 8.839973  | up | NM_019354    | Ucp2      | 54315  |
| 180.26329 | up | NM_013167    | Ucp3      | 25708  |
| 41.206635 | up | NM_001003709 | Ufc1      | 445268 |
| 39.36738  | up | NM_053418    | Ufd11     | 84478  |
| 3.5823674 | up | XM_001057949 | Ufm1      | 365797 |
| 7.478493  | up | NM_001014142 | Ufsp2     | 361151 |
| 2.5478315 | up | NM_133596    | Uggt1     | 171129 |
| 34.131836 | up | NM_001024743 | Ugp2      | 289827 |
| 3.0544686 | up | NM_001008882 | Uhrf1     | 316129 |
| 4.029779  | up | XM_001076826 | Uhrf1bp11 | 363009 |
| 14.29678  | up | NM_001013884 | Uimc1     | 290997 |
| 6.3612156 | up | NM_001025402 | Umps      | 288051 |
| 3.4823534 | up | NM_017188    | Unc119    | 29402  |
| 6.806744  | up | NM_001037647 | Unc45a    | 308759 |
| 70.01407  | up | XM_001081034 | Unc45b    | 303373 |
| 8.429974  | up | NM_138919    | Unc50     | 192356 |
| 2.051949  | up | XM_001076724 | Unc84b    | 315135 |
| 6.886159  | up | XM_001069535 | Unc93b1   | 361689 |
| 2.4452474 | up | XM_341556    | Upf2      | 361271 |
| 4.6462793 | up | NM_001012159 | Upf3a     | 361176 |
| 2.9056487 | up | XM_001058104 | Upf3b     | 313449 |

|           |    |              |           |        |
|-----------|----|--------------|-----------|--------|
| 2.6988118 | up | NM_001030025 | Upp1      | 289801 |
| 3.8194575 | up | XM_001075870 | Uqcr      | 690848 |
| 2.8702593 | up | XM_001057294 | Uqcrb     | 362897 |
| 3.6655972 | up | XM_001074011 | Uqcrb-ps1 | 690049 |
| 65.71776  | up | NM_001004250 | Uqcrc1    | 301011 |
| 79.84536  | up | NM_001006970 | Uqcrc2    | 293448 |
| 89.86711  | up | NM_001008888 | Uqcrfs1   | 291103 |
| 56.877094 | up | NM_001009480 | Uqcrh     | 366448 |
| 101.72796 | up | NM_001025134 | Uqcrq     | 497902 |
| 2.0278828 | up | XM_001053807 | Urb2      | 292087 |
| 3.3031416 | up | XM_001067008 | Urod      | 29421  |
| 2.5708528 | up | NM_001012068 | Uros      | 309070 |
| 17.195192 | up | XM_001065114 | Use1      | 290627 |
| 6.682023  | up | NM_031777    | Usf1      | 83586  |
| 2.123786  | up | NM_031139    | Usf2      | 81817  |
| 4.3608775 | up | NM_133544    | Usmg5     | 171069 |
| 8.578229  | up | NM_019379    | Uso1      | 56042  |
| 3.2822888 | up | NM_001015015 | Usp1      | 313387 |
| 9.672792  | up | NM_001034146 | Usp10     | 307905 |
| 77.42148  | up | XM_001066621 | Usp13     | 310306 |
| 13.955012 | up | NM_001008301 | Usp14     | 291796 |
| 17.828396 | up | NM_145184    | Usp15     | 171329 |
| 8.67742   | up | XM_001066902 | Usp16     | 288306 |
| 36.52818  | up | NM_001001516 | Usp19     | 361190 |
| 5.256408  | up | NM_053774    | Usp2      | 115771 |
| 3.415782  | up | XM_001079722 | Usp20     | 311856 |
| 3.505973  | up | XM_001067071 | Usp21     | 688466 |
| 4.2610807 | up | XM_001064937 | Usp24     | 313427 |
| 38.71389  | up | XM_001065002 | Usp25     | 304150 |
| 21.850147 | up | XM_001070037 | Usp28     | 315639 |
| 3.0983472 | up | NM_001025424 | Usp3      | 363084 |
| 2.6904542 | up | XM_001080428 | Usp30     | 304579 |
| 5.5635843 | up | XM_001081109 | Usp32     | 303394 |
| 2.0324543 | up | XM_001081749 | Usp36     | 303700 |
| 6.0478654 | up | XM_001073885 | Usp38     | 307764 |
| 18.5368   | up | XM_001063779 | Usp39     | 297336 |
| 34.449623 | up | XM_001074606 | Usp4      | 290864 |
| 2.4679208 | up | XM_001065510 | Usp40     | 316599 |
| 3.7032576 | up | XM_001072044 | Usp42     | 288482 |
| 2.3072784 | up | XM_232828    | Usp45     | 313098 |
| 14.345444 | up | XM_001074180 | Usp47     | 308896 |
| 3.2506945 | up | NM_198785    | Usp48     | 362636 |
| 2.1429744 | up | XM_001064731 | Usp49     | 316211 |
| 10.94093  | up | XM_001063162 | Usp5      | 297593 |

|           |    |              |          |        |
|-----------|----|--------------|----------|--------|
| 2.9518566 | up | XM_001074318 | Usp53    | 295425 |
| 16.683807 | up | XM_001078286 | Usp8     | 296121 |
| 22.536137 | up | XM_001056701 | Usp9x    | 363445 |
| 4.610718  | up | NM_001014113 | Utp14a   | 317579 |
| 4.358219  | up | XM_001069733 | Utp15    | 310019 |
| 9.661753  | up | XM_001081275 | Utp18    | 303456 |
| 3.987091  | up | XM_235023    | Utp20    | 314713 |
| 7.0745625 | up | XM_001063726 | Utp23    | 299900 |
| 8.811844  | up | XM_001080950 | Utp6     | 360574 |
| 6.2209935 | up | NM_139336    | Uxs1     | 246232 |
| 8.871711  | up | NM_012663    | Vamp2    | 24803  |
| 9.858836  | up | NM_057097    | Vamp3    | 29528  |
| 25.737034 | up | NM_053555    | Vamp5    | 89818  |
| 46.484863 | up | NM_053531    | Vamp7    | 85491  |
| 8.218039  | up | XM_001076616 | Vars     | 25009  |
| 2.8774602 | up | XM_001066594 | Vash2    | 498309 |
| 100.08742 | up | NM_053864    | Vcp      | 116643 |
| 2.871883  | up | NM_176857    | Vcpip1   | 286761 |
| 6.585224  | up | NM_031353    | Vdac1    | 83529  |
| 31.607853 | up | NM_031354    | Vdac2    | 83531  |
| 222.15518 | up | NM_031355    | Vdac3    | 83532  |
| 2.077691  | up | NM_031836    | Vegfa    | 83785  |
| 41.999565 | up | NM_053549    | Vegfb    | 89811  |
| 67.03252  | up | XM_001081191 | VeZF1    | 287615 |
| 17.218042 | up | NM_001006984 | VeZt     | 299738 |
| 6.615902  | up | XM_001058013 | Vgll2    | 309772 |
| 3.4903054 | up | NM_001015004 | Vgll4    | 297523 |
| 86.00565  | up | NM_031140    | Vim      | 81818  |
| 5.711189  | up | NM_203335    | Vkorc1   | 309004 |
| 3.9580567 | up | NM_203338    | Vkorc111 | 399684 |
| 6.472072  | up | NM_013155    | Vldlr    | 25696  |
| 9.455453  | up | XM_001067193 | Vma21    | 501658 |
| 8.715701  | up | XM_001071998 | Vprbp    | 315987 |
| 3.7882278 | up | XM_001061508 | Vps11    | 315600 |
| 5.3981824 | up | NM_001005541 | Vps16    | 296159 |
| 9.743979  | up | NM_172331    | Vps24    | 282834 |
| 7.052957  | up | NM_001007740 | Vps26a   | 361846 |
| 2.7444286 | up | XM_001054836 | Vps26b   | 300472 |
| 46.106354 | up | XM_001073010 | Vps28    | 300052 |
| 6.2146926 | up | XM_001079533 | Vps29    | 288666 |
| 2.5724227 | up | NM_022961    | Vps33a   | 65081  |
| 2.7456133 | up | NM_022286    | Vps33b   | 64060  |
| 13.176169 | up | XM_001068608 | Vps35    | 25479  |
| 22.879492 | up | XM_214382    | Vps36    | 290851 |



|           |    |              |         |        |
|-----------|----|--------------|---------|--------|
| 3.1156187 | up | NM_001024867 | Vps37a  | 290775 |
| 3.166727  | up | XM_001075756 | Vps39   | 362199 |
| 5.0534005 | up | NM_172072    | Vps45   | 64516  |
| 16.984556 | up | NM_145678    | Vps4a   | 246772 |
| 3.4991486 | up | XM_001080583 | Vps53   | 287535 |
| 29.543991 | up | XM_001059613 | Vps72   | 310661 |
| 3.3880343 | up | NM_001012194 | Vrk1    | 362779 |
| 2.3866124 | up | XM_001064313 | Vrk2    | 360991 |
| 3.0260231 | up | NM_001005561 | Vrk3    | 361565 |
| 3.1175532 | up | NM_001025640 | Vta1    | 292640 |
| 8.4122715 | up | NM_023101    | Vti1a   | 65277  |
| 4.239105  | up | NM_019156    | Vtn     | 29169  |
| 2.6461318 | up | NM_198755    | Vwa5a   | 301097 |
| 17.75224  | up | NM_001013170 | Wars    | 314442 |
| 4.0016212 | up | XM_001055085 | Wbp1    | 297381 |
| 4.0824294 | up | NM_138975    | Wbp2    | 192645 |
| 4.3922153 | up | XM_001056814 | Wbp5    | 680354 |
| 2.2904885 | up | XM_001077926 | Wbscr16 | 360796 |
| 9.823382  | up | XM_001071583 | Wbscr22 | 368084 |
| 4.3497963 | up | NM_001008331 | Wdfy1   | 301549 |
| 2.112597  | up | XM_001060345 | Wdfy3   | 305164 |
| 22.93032  | up | NM_001014135 | Wdr1    | 360950 |
| 5.8965797 | up | XM_001057763 | Wdr13   | 317370 |
| 3.537874  | up | NM_001039027 | Wdr18   | 314617 |
| 8.836211  | up | XM_001061380 | Wdr24   | 360497 |
| 2.057412  | up | XM_001069823 | Wdr25l  | 314443 |
| 2.901129  | up | XM_001062709 | Wdr26   | 498301 |
| 11.942085 | up | XM_001065786 | Wdr3    | 310720 |
| 4.979683  | up | XM_001072062 | Wdr35   | 298876 |
| 2.2670357 | up | XM_001060069 | Wdr36   | 361305 |
| 4.267248  | up | XM_001060920 | Wdr37   | 307075 |
| 7.152963  | up | XM_342175    | Wdr41   | 361879 |
| 4.70698   | up | XM_001059356 | Wdr43   | 362703 |
| 3.6220675 | up | XM_001061437 | Wdr44   | 246152 |
| 23.796959 | up | NM_001013958 | Wdr45   | 302559 |
| 10.24599  | up | NM_001039587 | Wdr45l  | 360682 |
| 4.7948165 | up | NM_212491    | Wdr46   | 309628 |
| 5.6145134 | up | XM_001071369 | Wdr47   | 310785 |
| 2.8029964 | up | XM_001055273 | Wdr54   | 500226 |
| 2.4350145 | up | NM_001017932 | Wdr55   | 307494 |
| 2.9250686 | up | XM_001061189 | Wdr60   | 314523 |
| 3.3362367 | up | XM_001075797 | Wdr62   | 308492 |
| 2.536334  | up | XM_216928    | Wdr67   | 299949 |
| 2.142762  | up | NM_001013909 | Wdr70   | 294783 |

|           |    |              |         |        |
|-----------|----|--------------|---------|--------|
| 10.656297 | up | XM_001076401 | Wdr74   | 690229 |
| 7.287272  | up | NM_001047889 | Wdr75   | 314545 |
| 51.01465  | up | NM_001008771 | Wdr77   | 310769 |
| 3.6274145 | up | NM_001014262 | Wdr8    | 366515 |
| 2.3218684 | up | XM_001065006 | Wdr91   | 312225 |
| 3.3755736 | up | NM_001014179 | Wdsub1  | 362137 |
| 4.6868715 | up | NM_001025024 | Wdyhv1  | 362914 |
| 12.415003 | up | NM_031823    | Wfs1    | 83725  |
| 2.5437589 | up | XM_001067296 | Whamm   | 293057 |
| 2.6443386 | up | XM_001058223 | Whsc1   | 680537 |
| 2.609606  | up | XM_001081631 | Wipi1   | 303630 |
| 16.011665 | up | NM_001007615 | Wipi2   | 288498 |
| 3.6653295 | up | NM_053402    | Wnt4    | 84426  |
| 4.3619385 | up | NM_001007610 | Wrap53  | 287432 |
| 4.6085877 | up | NM_172332    | Wrnip1  | 282835 |
| 24.56577  | up | NM_001007616 | Wsb2    | 288692 |
| 7.130294  | up | XM_001076479 | Wwox    | 292041 |
| 3.4930267 | up | NM_001024757 | Wwp1    | 297930 |
| 3.8905852 | up | XM_001076615 | Wwp2    | 291999 |
| 26.362322 | up | NM_001024869 | Wwtr1   | 295062 |
| 7.762934  | up | NM_139109    | Xab2    | 245976 |
| 5.140749  | up | NM_017154    | Xdh     | 497811 |
| 2.6357558 | up | NM_022231    | Xiap    | 63879  |
| 50.05021  | up | XM_001077697 | Xirp1   | 316071 |
| 139.98167 | up | NM_201989    | Xirp2   | 311098 |
| 3.8622127 | up | XM_001071899 | Xpa     | 298074 |
| 3.7084682 | up | NM_131913    | Xpnpep1 | 170751 |
| 27.016739 | up | NM_053490    | Xpo1    | 85252  |
| 2.585424  | up | XM_001063318 | Xpo4    | 290280 |
| 2.3168151 | up | XM_001064242 | Xpo5    | 363194 |
| 4.1542616 | up | XM_001076854 | Xpo6    | 293476 |
| 6.1632633 | up | XM_001071291 | Xpo7    | 361070 |
| 5.7189145 | up | XM_001079263 | Xpot    | 314879 |
| 2.015866  | up | XM_001072331 | Xpr1    | 289424 |
| 11.273611 | up | NM_177419    | Xrcc5   | 363247 |
| 6.4577727 | up | NM_139080    | Xrcc6   | 25019  |
| 2.8600273 | up | XM_001069029 | Xrn1    | 300944 |
| 7.0028462 | up | XM_001055882 | Xrn2    | 362229 |
| 5.006454  | up | NM_001009627 | Yars2   | 287924 |
| 5.1857505 | up | NM_031563    | Ybx1    | 500538 |
| 2.226254  | up | XM_001079683 | Ybx2    | 303250 |
| 36.408142 | up | XM_001078961 | Yeats4  | 299810 |
| 6.455645  | up | NM_001014810 | Yif1b   | 292768 |
| 27.002125 | up | NM_199383    | Yipf1   | 298312 |

|           |    |              |         |        |
|-----------|----|--------------|---------|--------|
| 5.9582996 | up | NM_001007801 | Yipf3   | 301245 |
| 18.475431 | up | NM_001009712 | Yipf4   | 362699 |
| 3.219529  | up | NM_001025747 | Yipf6   | 363476 |
| 4.8290615 | up | XM_001077453 | Yipf7   | 364147 |
| 5.662004  | up | NM_031692    | Ykt6    | 64351  |
| 10.956371 | up | XM_001057111 | Ylpm1   | 299199 |
| 11.243466 | up | NM_053682    | Yme111  | 114217 |
| 6.561137  | up | NM_001035221 | Ypel5   | 298792 |
| 8.139636  | up | NM_175604    | Yrdc    | 319113 |
| 6.5887184 | up | NM_133423    | Ythdc1  | 170956 |
| 3.0057573 | up | NM_001024756 | Ythdf1  | 296467 |
| 7.571599  | up | NM_001047099 | Ythdf2  | 313053 |
| 5.248105  | up | XM_001054853 | Ythdf3  | 361920 |
| 9.870721  | up | NM_019377    | Ywhab   | 56011  |
| 223.97728 | up | NM_031603    | Ywhae   | 29753  |
| 4.725041  | up | NM_019376    | Ywhag   | 56010  |
| 25.785736 | up | NM_013052    | Ywhah   | 25576  |
| 9.413329  | up | NM_013053    | Ywhaq   | 25577  |
| 46.567875 | up | NM_013011    | Ywhaz   | 25578  |
| 5.258768  | up | XM_001060611 | Zadh2   | 291403 |
| 9.012709  | up | NM_001004444 | Zbtb1   | 314246 |
| 3.5867782 | up | NM_024489    | Zbtb10  | 80338  |
| 12.207973 | up | NM_001012105 | Zbtb17  | 313666 |
| 2.0970695 | up | XM_001065469 | Zbtb2   | 308126 |
| 2.01253   | up | NM_001009172 | Zbtb22  | 309630 |
| 2.431042  | up | XM_001058234 | Zbtb33  | 501506 |
| 4.826269  | up | XM_001060735 | Zbtb8os | 297885 |
| 2.3147693 | up | NM_213564    | Zbtb9   | 294289 |
| 6.075636  | up | XM_001065797 | Zc3h10  | 685928 |
| 2.5432353 | up | XM_001071727 | Zc3h12c | 315658 |
| 10.807872 | up | NM_001033951 | Zc3h14  | 192359 |
| 6.334379  | up | NM_001010963 | Zc3h15  | 362154 |
| 8.859978  | up | NM_201416    | Zc3h18  | 292067 |
| 2.6180274 | up | XM_001076011 | Zc3h7a  | 360466 |
| 6.067936  | up | NM_001012090 | Zc3h8   | 311414 |
| 2.6296196 | up | NM_173045    | Zc3hav1 | 252832 |
| 3.4379067 | up | XM_233345    | Zcchc11 | 313481 |
| 6.2532353 | up | XM_001062322 | Zcchc17 | 500555 |
| 4.8947783 | up | XM_001060307 | Zcchc6  | 501515 |
| 5.3845487 | up | XM_001074938 | Zcchc8  | 288661 |
| 19.464083 | up | NM_001034940 | Zcrb1   | 362990 |
| 9.883109  | up | NM_001039099 | Zdhhc1  | 291967 |
| 2.0020568 | up | NM_001013239 | Zdhhc12 | 366014 |
| 6.149835  | up | NM_001039037 | Zdhhc13 | 365252 |

|           |    |              |         |        |
|-----------|----|--------------|---------|--------|
| 24.455381 | up | NM_001039346 | Zdhhc16 | 654495 |
| 2.9942205 | up | NM_001039340 | Zdhhc17 | 366889 |
| 2.214826  | up | NM_001039336 | Zdhhc20 | 305923 |
| 17.842533 | up | NM_001039014 | Zdhhc3  | 301081 |
| 16.53707  | up | NM_001039338 | Zdhhc5  | 362156 |
| 6.4103546 | up | NM_001037652 | Zdhhc6  | 361771 |
| 5.9669213 | up | NM_133394    | Zdhhc7  | 170906 |
| 35.03429  | up | NM_013164    | Zeb1    | 25705  |
| 3.6185005 | up | NM_001033701 | Zeb2    | 311071 |
| 2.1990957 | up | XM_001055634 | Zfand1  | 361917 |
| 3.9350495 | up | NM_001025745 | Zfand2b | 363253 |
| 3.3502226 | up | NM_001012175 | Zfand3  | 361816 |
| 34.326077 | up | XM_001079764 | Zfand5  | 293960 |
| 28.440191 | up | NM_001007630 | Zfand6  | 293067 |
| 2.339018  | up | XM_001078674 | Zfc3h1  | 314836 |
| 2.4638002 | up | XM_001076847 | Zfhx3   | 307829 |
| 3.0331116 | up | XM_226964    | Zfhx4   | 310250 |
| 2.8170803 | up | XM_001077676 | Zfp1    | 498952 |
| 8.756469  | up | NM_001024775 | Zfp110  | 308362 |
| 2.1229389 | up | XM_001055283 | Zfp13   | 287095 |
| 3.5201657 | up | NM_001012169 | Zfp143  | 361627 |
| 5.344076  | up | XM_001060246 | Zfp187  | 266792 |
| 2.8824759 | up | NM_182955    | Zfp191  | 360204 |
| 21.575607 | up | NM_001039020 | Zfp207  | 303763 |
| 7.841867  | up | NM_022678    | Zfp238  | 64619  |
| 2.5270426 | up | XM_001075451 | Zfp251  | 366954 |
| 3.6658878 | up | XM_001064960 | Zfp259  | 500989 |
| 3.3223035 | up | NM_017364    | Zfp260  | 53982  |
| 3.402894  | up | XM_001077681 | Zfp277  | 298977 |
| 2.2889652 | up | XM_001076089 | Zfp317  | 500950 |
| 2.678463  | up | XM_001062211 | Zfp318  | 685082 |
| 9.508473  | up | XM_001073428 | Zfp330  | 361387 |
| 3.2734828 | up | XM_001060009 | Zfp335  | 259270 |
| 7.712285  | up | XM_001063740 | Zfp358  | 360754 |
| 3.2199833 | up | NM_133290    | Zfp36   | 79426  |
| 2.1484807 | up | XM_216345    | Zfp362  | 297879 |
| 2.2984817 | up | NM_001036626 | Zfp3612 | 298765 |
| 7.9526753 | up | NM_001034830 | Zfp384  | 171018 |
| 11.921985 | up | XM_001058294 | Zfp410  | 314310 |
| 16.409327 | up | NM_001009664 | Zfp414  | 299647 |
| 3.1500027 | up | XM_001068393 | Zfp428  | 361519 |
| 2.3405237 | up | XM_001078410 | Zfp445  | 301076 |
| 7.756338  | up | NM_001033705 | Zfp451  | 316312 |
| 2.0617747 | up | XM_001078828 | Zfp568  | 308488 |

|           |    |              |          |        |
|-----------|----|--------------|----------|--------|
| 4.407211  | up | XM_001060627 | Zfp706   | 500855 |
| 2.6342525 | up | XM_001078207 | Zfp70912 | 362845 |
| 2.1654222 | up | XM_001078778 | Zfp74    | 365224 |
| 2.1951287 | up | XM_001064404 | Zfp780b  | 685578 |
| 6.385375  | up | XM_001065858 | Zfp828   | 306647 |
| 4.0035553 | up | XM_001056210 | Zfr      | 365703 |
| 2.4204178 | up | XM_001065337 | Zfx      | 367832 |
| 6.9045897 | up | XM_001067896 | Zhx2     | 314988 |
| 2.0530467 | up | XM_001070925 | Zkscan5  | 304275 |
| 2.4153066 | up | XM_001054961 | Zmiz1    | 361103 |
| 3.0045831 | up | XM_001058926 | Zmym1    | 313604 |
| 6.1081557 | up | XM_001060431 | Zmym2    | 305913 |
| 2.3825724 | up | XM_001059117 | Zmym6    | 362602 |
| 4.679734  | up | NM_203366    | Zmynd11  | 291259 |
| 10.502817 | up | XM_001056023 | Zmynd17  | 289904 |
| 6.658464  | up | XM_001061666 | Zmynd8   | 296374 |
| 4.262285  | up | XM_001075472 | Znf23    | 307839 |
| 2.0790136 | up | XM_001056267 | Znf295   | 304056 |
| 21.17016  | up | XM_001070965 | Znf394   | 252860 |
| 12.878758 | up | XM_001075266 | Znf496   | 287361 |
| 3.9448996 | up | XM_001065659 | Znf503   | 305687 |
| 2.3007612 | up | XM_001062542 | Znf509   | 305428 |
| 3.562413  | up | XM_001059063 | Znf511   | 293586 |
| 2.1507058 | up | NM_001030038 | Znf518a  | 309478 |
| 11.304102 | up | XM_001073019 | Znf521   | 307579 |
| 3.268796  | up | XM_001064928 | Znf532   | 307362 |
| 5.272477  | up | XM_001061608 | Znf592   | 293038 |
| 14.169117 | up | XM_001056388 | Znf598   | 287119 |
| 3.47173   | up | XM_225755    | Znf608   | 307296 |
| 2.2034714 | up | XM_001078412 | Znf688   | 293511 |
| 3.848863  | up | XM_001075322 | Znf692   | 303164 |
| 2.810872  | up | XM_001053818 | Znf746   | 312303 |
| 2.026794  | up | XM_001053412 | Znf777   | 502764 |
| 4.6991987 | up | NM_001037360 | Znf830   | 497967 |
| 2.4951434 | up | XM_001071353 | Znf839   | 500723 |
| 2.08352   | up | NM_001047860 | Znfx1    | 296384 |
| 2.1661386 | up | XM_001081104 | Znhit3   | 497975 |
| 6.277812  | up | XM_001079278 | Znhit6   | 292160 |
| 3.9868867 | up | NM_213567    | Znrd1    | 361784 |
| 5.1997795 | up | XM_001060895 | Znrf2    | 362367 |
| 11.685678 | up | NM_031616    | Zranb2   | 58821  |
| 5.732154  | up | NM_001017504 | Zrsr1    | 498425 |
| 2.3695376 | up | NM_001012021 | Zscan21  | 304342 |
| 2.8649735 | up | XM_001070698 | Zswim3   | 311630 |

|           |    |              |        |        |
|-----------|----|--------------|--------|--------|
| 6.2221537 | up | XM_001067858 | Zswim4 | 304655 |
| 14.969494 | up | NM_001024801 | Zw10   | 363059 |
| 2.1035545 | up | NM_147138    | Zwint  | 257644 |
| 3.5818927 | up | XM_001072096 | Zyx    | 114636 |

**Control\_vs\_Normal 2.0 fold down regulated genes**

| Fold change | Regulation | ACCESSION    | GeneSymbol | GeneID |
|-------------|------------|--------------|------------|--------|
| 8.299269    | down       | XM_574883    | 11-Mar     | 499558 |
| 3.2765787   | down       | NM_001012460 | 1-Sep      | 293507 |
| 20.701687   | down       | XM_001077761 | 6-Sep      | 691335 |
| 11.061232   | down       | NM_001025634 | A2ld1      | 290500 |
| 4.162712    | down       | XM_001067255 | Aaas       | 300259 |
| 2.16116     | down       | XM_001062198 | Aadacl2    | 295076 |
| 3.8256989   | down       | NM_134398    | Aagab      | 171435 |
| 2.251931    | down       | XM_001070331 | Aak1       | 500244 |
| 2.18158     | down       | NM_145093    | Aard       | 246323 |
| 3.7086017   | down       | XM_001067517 | Aars2      | 301254 |
| 5.556882    | down       | NM_031003    | Abat       | 81632  |
| 3.1010847   | down       | XM_001075753 | Abca15     | 293442 |
| 2.0041337   | down       | XM_001054596 | Abca3      | 302973 |
| 3.2180715   | down       | XM_001062082 | Abcb5      | 314537 |
| 5.556858    | down       | NM_053754    | Abcg5      | 114628 |
| 2.0560272   | down       | NM_001013118 | Abi3       | 303476 |
| 10.646641   | down       | XM_001068096 | Abl2       | 304883 |
| 2.0399144   | down       | XM_001072491 | Abt1       | 306960 |
| 3.497746    | down       | NM_012489    | Acaa1      | 24157  |
| 4.647921    | down       | NM_001034014 | Accn1      | 25364  |
| 2.0124934   | down       | NM_024154    | Accn2      | 79123  |
| 3.537833    | down       | NM_172009    | Ache       | 83817  |
| 3.00379     | down       | NM_001080096 | Acsbg2     | 301120 |
| 5.1431317   | down       | NM_144748    | Acsm2      | 246263 |
| 12.444978   | down       | NM_001014162 | Acsm5      | 361637 |
| 15.229722   | down       | XM_001074422 | Actbl2     | 294732 |
| 11.09194    | down       | NM_022441    | Acvrl1     | 25237  |
| 2.212402    | down       | XM_001055227 | Acyp2      | 364224 |
| 5.585696    | down       | XM_001054670 | Adam12     | 679837 |
| 4.514208    | down       | NM_020078    | Adam1a     | 56777  |
| 16.890736   | down       | XM_228290    | Adamts14   | 309837 |
| 2.6849713   | down       | XM_001060610 | Adamts19   | 361332 |
| 5.355706    | down       | XM_341154    | Adamts4    | 66015  |
| 8.593815    | down       | XM_001072537 | Adamts6    | 361886 |
| 21.685356   | down       | XM_001078833 | Adamts12   | 311827 |
| 2.0093038   | down       | XM_001075711 | Adat1      | 690810 |

|           |      |              |          |        |
|-----------|------|--------------|----------|--------|
| 2.224755  | down | NM_001012065 | Adck4    | 308453 |
| 4.0972166 | down | NM_144744    | Adipoq   | 246253 |
| 3.3320558 | down | XM_001057958 | Adprhl2  | 362600 |
| 2.7144709 | down | NM_138506    | Adra2c   | 24175  |
| 2.9002564 | down | XM_001069152 | Aebp1    | 305494 |
| 9.012444  | down | NM_080900    | Afap1    | 140935 |
| 3.9030876 | down | XM_001058822 | Afap111  | 291565 |
| 13.431624 | down | XM_001066299 | Agap1    | 316611 |
| 4.6442437 | down | XM_342881    | Agbl4    | 362562 |
| 2.5638835 | down | NM_053336    | Ager     | 81722  |
| 3.0133858 | down | XM_226709    | Aggf1    | 310005 |
| 20.671062 | down | XM_001070306 | Agps     | 84114  |
| 3.059936  | down | NM_175754    | Agrn     | 25592  |
| 4.0440702 | down | NM_013149    | Ahr      | 25690  |
| 2.7656295 | down | XM_001066198 | Aifm3    | 303786 |
| 2.841165  | down | XM_214790    | Aig1     | 292486 |
| 2.6406074 | down | XM_001069409 | Ak7      | 314416 |
| 2.0208218 | down | NM_022680    | Akp3     | 64621  |
| 5.4280176 | down | NM_138510    | Akr1c18  | 171516 |
| 5.399938  | down | NM_013215    | Akr7a3   | 26760  |
| 2.0341518 | down | XM_001077092 | Alkbh4   | 288587 |
| 2.3836877 | down | XM_001079600 | Alox12   | 287454 |
| 2.0877938 | down | NM_013059    | Alpl     | 25586  |
| 21.456038 | down | NM_012921    | Alx1     | 25401  |
| 6.0937743 | down | XM_341644    | Amfr     | 361367 |
| 4.8943563 | down | XM_001057982 | Ammecr11 | 307526 |
| 2.011514  | down | NM_031502    | Amy2     | 497039 |
| 2.3653278 | down | XM_345278    | Amy2-3   | 365914 |
| 4.0745707 | down | NM_001047092 | Amz1     | 304317 |
| 6.074704  | down | NM_001012359 | Ang      | 497229 |
| 13.082161 | down | NM_001006992 | Ang1     | 305843 |
| 16.494251 | down | XM_216613    | Angptl6  | 298698 |
| 4.4441013 | down | XM_576558    | Ankar    | 501138 |
| 7.5344677 | down | XM_346238    | Ankdd1a  | 367646 |
| 3.3529134 | down | NM_001047901 | Ankle2   | 360829 |
| 2.59251   | down | XM_001068648 | Ankrd13d | 361699 |
| 8.260152  | down | XM_574104    | Ankrd29  | 498823 |
| 2.5736651 | down | NM_198684    | Ankrd36  | 305491 |
| 4.834202  | down | XM_001061163 | Ankrd37  | 361149 |
| 2.690907  | down | XM_001070685 | Ankrd52  | 362811 |
| 5.5059514 | down | XM_342195    | Ankrd55  | 361898 |
| 11.38182  | down | XM_001053864 | Ankrd57  | 503306 |
| 2.963331  | down | XM_001067026 | Anln     | 307056 |
| 4.282546  | down | XM_235024    | Ano4     | 299714 |

|           |      |              |          |        |
|-----------|------|--------------|----------|--------|
| 5.742238  | down | XM_001057694 | Ano6     | 315272 |
| 2.959141  | down | XM_001071546 | Anxa10   | 498622 |
| 2.8912454 | down | NM_001031654 | Anxa8    | 306283 |
| 2.378863  | down | NM_023979    | Apaf1    | 78963  |
| 5.566303  | down | XM_001079912 | Apob48r  | 499264 |
| 8.227828  | down | NM_001085352 | Apoc2    | 292697 |
| 2.1487882 | down | XM_001075828 | Apol2    | 315111 |
| 3.1063163 | down | NM_173105    | Aqp11    | 286758 |
| 2.083774  | down | NM_001024742 | Ard1b    | 289482 |
| 4.9276166 | down | XM_001081375 | Arhgap23 | 303501 |
| 2.2780907 | down | XM_001070699 | Arhgap25 | 500246 |
| 3.3548567 | down | XM_001066829 | Arhgap26 | 307459 |
| 2.6428225 | down | XM_001053966 | Arhgap30 | 498282 |
| 3.1895685 | down | NM_144740    | Arhgap4  | 246249 |
| 19.35832  | down | XM_001061568 | Arhgdig  | 360500 |
| 3.1870332 | down | NM_001013246 | Arhgef12 | 367072 |
| 2.2050524 | down | XM_001067343 | Arhgef17 | 308862 |
| 2.9885247 | down | XM_001073085 | Arhgef5  | 140898 |
| 2.0587955 | down | XM_001055321 | Arl13b   | 304037 |
| 10.047133 | down | NM_212459    | Arl9     | 289565 |
| 5.378963  | down | XM_001060650 | Armc10   | 296758 |
| 10.187062 | down | XM_001071122 | Armc6    | 306352 |
| 2.7928028 | down | NM_001024367 | Armcx1   | 501619 |
| 5.9338946 | down | XM_001055969 | Arrdc5   | 680452 |
| 6.135757  | down | NM_001047885 | Arse     | 310326 |
| 2.5327764 | down | XM_001068810 | Asb13    | 361268 |
| 3.8399632 | down | XM_001081507 | Asb16    | 498005 |
| 3.4502347 | down | NM_017189    | Asgr2    | 29403  |
| 14.278155 | down | NM_144750    | Aspg     | 246266 |
| 2.6322587 | down | XM_001076577 | Aspscr1  | 691026 |
| 5.841935  | down | XM_230576    | Astl     | 296129 |
| 3.8673043 | down | XM_001068889 | Atf7     | 315333 |
| 3.97827   | down | NM_001038495 | Atg12    | 361321 |
| 5.221645  | down | NM_001012097 | Atg7     | 312647 |
| 17.100565 | down | NM_012508    | Atp2b2   | 24215  |
| 2.6352043 | down | XM_001055453 | Atp6v1e2 | 366545 |
| 14.861855 | down | XM_223390    | Atp8a1   | 289615 |
| 2.4407587 | down | NM_021702    | Atxn3    | 60331  |
| 2.803544  | down | XM_228583    | Awat2    | 302425 |
| 4.364897  | down | NM_024355    | Axin2    | 29134  |
| 2.7616425 | down | XM_001081778 | Azi1     | 360672 |
| 7.1085277 | down | XM_001057849 | B3galt1  | 366064 |
| 3.1598358 | down | XM_001069916 | B3gnt8   | 308440 |
| 2.7924328 | down | XM_342584    | B4galt5  | 362275 |



|            |      |              |           |        |
|------------|------|--------------|-----------|--------|
| 4.198874   | down | NM_001031661 | B4galt7   | 364675 |
| 7.328861   | down | NM_017300    | Baat      | 29725  |
| 28.818754  | down | XM_001062170 | Bai2      | 313058 |
| 14.831034  | down | NM_022300    | Baspl     | 64160  |
| 3.9635012  | down | XM_341141    | Bat2d1    | 360865 |
| 5.6085877  | down | XM_001057854 | Batf      | 299206 |
| 9.944945   | down | XM_001071505 | Batf2     | 309178 |
| 13.840635  | down | NM_021865    | Batf3     | 60462  |
| 2.267492   | down | XM_222315    | Baz2a     | 304601 |
| 5.4291697  | down | NM_173837    | Bbc3      | 317673 |
| 2.5914855  | down | XM_001063816 | Bcdin3d   | 363001 |
| 17.71974   | down | XM_001057750 | Bcl11a    | 305589 |
| 2.3395865  | down | NM_016993    | Bcl2      | 24224  |
| 2.8451672  | down | NM_001033670 | Bcl2l1    | 24888  |
| 9.782247   | down | NM_021850    | Bcl2l2    | 60434  |
| 3.1659358  | down | XM_001057993 | Bcl3      | 680611 |
| 9.285501   | down | XM_001059897 | Bend4     | 681008 |
| 3.2299335  | down | NM_001033674 | Bicd2     | 306809 |
| 7.715339   | down | NM_001012223 | Bin2      | 366988 |
| 2.217785   | down | XM_001070524 | Bmp1      | 83470  |
| 8.168703   | down | XM_001053727 | Bmp7      | 85272  |
| 15.872786  | down | XM_001057343 | Bms1      | 362426 |
| 4.562021   | down | XM_001071364 | Bmx       | 367786 |
| 2.4397054  | down | XM_001073216 | Bola2     | 503208 |
| 2.086543   | down | XM_001063756 | Bpil1     | 296290 |
| 2.7178984  | down | XM_343175    | Brd4      | 362844 |
| 13.045282  | down | XM_001078549 | Brpf3     | 309647 |
| 3.3811467  | down | XM_001071463 | Brsk1     | 499073 |
| 15.5344515 | down | XM_001075067 | Bruno16   | 300758 |
| 21.868116  | down | XM_001061326 | Bsdc1     | 297890 |
| 36.48825   | down | NM_019146    | Bsn       | 29138  |
| 2.9397473  | down | XM_576181    | Btbd2     | 500793 |
| 2.704895   | down | NM_001007798 | Btk       | 367901 |
| 9.166404   | down | NM_213630    | Btla      | 407756 |
| 6.8687654  | down | XM_001077286 | Btnl4     | 294268 |
| 2.1384199  | down | XM_001058059 | C1d       | 289810 |
| 2.561373   | down | XM_001066953 | C1d-ps1   | 689062 |
| 3.5442595  | down | NM_001007675 | C1qtnf1   | 303701 |
| 16.616453  | down | XM_001059843 | C1qtnf3   | 294806 |
| 8.087147   | down | XM_001077863 | C1qtnf4   | 311184 |
| 8.2740135  | down | NM_001002804 | C1rl      | 408246 |
| 21.432966  | down | NM_001025769 | C20orf165 | 499943 |
| 5.4818335  | down | XM_001054007 | C7        | 117517 |
| 3.8198931  | down | XM_001063411 | Cab39     | 301574 |

|           |      |              |          |        |
|-----------|------|--------------|----------|--------|
| 5.575489  | down | NM_133529    | Cabp1    | 171051 |
| 5.835933  | down | XM_001068353 | Cabp4    | 365394 |
| 3.5200865 | down | NM_001007730 | Cabp7    | 360970 |
| 5.637156  | down | NM_147141    | Cacna1b  | 257648 |
| 10.025061 | down | NM_153814    | Cacna1h  | 114862 |
| 2.005575  | down | NM_053851    | Cacnb2   | 116600 |
| 2.7539914 | down | NM_012828    | Cacnb3   | 25297  |
| 3.7763941 | down | NM_080691    | Cacng3   | 140724 |
| 2.5443292 | down | NM_080695    | Cacng7   | 140728 |
| 2.6087694 | down | NM_080696    | Cacng8   | 140729 |
| 11.396112 | down | NM_001047107 | Cadm4    | 365216 |
| 3.224109  | down | NM_053988    | Calb2    | 117059 |
| 14.003207 | down | NM_017338    | Calca    | 24241  |
| 24.08758  | down | NM_001012054 | Calml3   | 307100 |
| 3.163344  | down | NM_138915    | Caly     | 192349 |
| 2.531107  | down | NM_021678    | Camk2n2  | 59314  |
| 2.3052492 | down | NM_022383    | Cap1     | 64185  |
| 3.0062163 | down | NM_001013086 | Capg     | 297339 |
| 6.255817  | down | NM_031673    | Capn10   | 63834  |
| 4.5025463 | down | XM_001078527 | Capn12   | 308476 |
| 5.764862  | down | NM_133309    | Capn8    | 170808 |
| 2.0999722 | down | XM_001057555 | Capsl    | 294795 |
| 2.9108298 | down | XM_001075425 | Car6     | 298657 |
| 3.0850904 | down | XM_001076142 | Card10   | 315120 |
| 9.1544895 | down | XM_001054821 | Card6    | 294770 |
| 2.2233658 | down | XM_001076079 | Carkd    | 361185 |
| 2.550848  | down | NM_001034088 | Carm1    | 363026 |
| 3.453919  | down | NM_080690    | Caskin1  | 140722 |
| 2.3775387 | down | XM_001053920 | Cass4    | 296409 |
| 10.116476 | down | XM_342941    | Catsper4 | 362623 |
| 2.3599904 | down | XM_001055098 | Cbr3     | 304078 |
| 2.8799236 | down | NM_001008313 | Cbx3     | 297093 |
| 17.530815 | down | XM_001081757 | Cbx4     | 501403 |
| 3.2552843 | down | NM_001012119 | Cbx6     | 315136 |
| 10.890511 | down | XM_001058226 | Ccdc102a | 361363 |
| 3.890216  | down | XM_001081527 | Ccdc103  | 498006 |
| 6.7232814 | down | XM_001059637 | Ccdc106  | 499071 |
| 2.112581  | down | XM_001053914 | Ccdc11   | 364899 |
| 23.177656 | down | XM_001080782 | Ccdc114  | 308594 |
| 10.598474 | down | XM_001062881 | Ccdc121  | 289329 |
| 3.1429257 | down | XM_574843    | Ccdc125  | 499518 |
| 4.767837  | down | NM_001024355 | Ccdc134  | 500909 |
| 2.0077624 | down | XM_001071774 | Ccdc14   | 288054 |
| 4.3764577 | down | NM_001013953 | Ccdc153  | 300663 |

|           |      |              |          |        |
|-----------|------|--------------|----------|--------|
| 16.11274  | down | XM_001059305 | Ccdc154  | 287131 |
| 3.0320132 | down | XM_001080694 | Ccdc155  | 308581 |
| 18.569473 | down | XM_001062522 | Ccdc157  | 681091 |
| 9.610928  | down | NM_001038992 | Ccdc23   | 362578 |
| 13.258381 | down | NM_001014091 | Ccdc33   | 315712 |
| 2.1095173 | down | XM_001055346 | Ccdc36   | 680018 |
| 2.3600092 | down | XM_001081764 | Ccdc40   | 287867 |
| 3.6905572 | down | XM_001079849 | Ccdc42b  | 304509 |
| 4.367532  | down | XM_001063933 | Ccdc54   | 498073 |
| 17.719494 | down | NM_001014087 | Ccdc67   | 315438 |
| 2.7093804 | down | XM_001058720 | Ccdc74a  | 680752 |
| 8.964924  | down | NM_001009533 | Ccdc8    | 494320 |
| 6.822966  | down | XM_001076332 | Ccdc85c  | 690965 |
| 2.0480437 | down | XM_001061924 | Ccdc94   | 501285 |
| 9.6402    | down | NM_001034138 | Ccdc99   | 303037 |
| 30.179735 | down | NM_012829    | Cck      | 25298  |
| 5.461916  | down | XM_001067590 | Ccl1     | 688605 |
| 2.0946298 | down | NM_019205    | Ccl11    | 29397  |
| 2.0866163 | down | NM_019233    | Ccl20    | 29538  |
| 3.3791413 | down | XM_001077331 | Ccne1    | 25729  |
| 3.6122963 | down | XM_001064132 | Ccne2    | 362485 |
| 6.5424814 | down | XM_001071133 | Ccnf-ps1 | 689538 |
| 2.2081563 | down | XM_001057184 | Ccnj     | 294053 |
| 4.224866  | down | XM_001059952 | Cent1    | 315291 |
| 2.003735  | down | NM_001037794 | Cct8l1   | 499967 |
| 3.6786385 | down | XM_001079863 | Cd19     | 365367 |
| 26.394825 | down | XM_001058705 | Cd209a   | 288375 |
| 36.836327 | down | XM_001064144 | Cd209b   | 288378 |
| 7.4493856 | down | NM_182824    | Cd276    | 315716 |
| 12.53164  | down | NM_001025111 | Cd300lf  | 287818 |
| 3.0518348 | down | NM_013169    | Cd3d     | 25710  |
| 2.1569946 | down | NM_012523    | Cd53     | 24251  |
| 25.742844 | down | NM_001025685 | Cd5l     | 310693 |
| 2.639215  | down | NM_175577    | Cd6      | 25752  |
| 3.4575374 | down | NM_020081    | Cd86     | 56822  |
| 2.5622435 | down | XM_001061998 | Cd99     | 652929 |
| 2.6269422 | down | NM_001013103 | Cdc34    | 299602 |
| 14.578326 | down | XM_001070494 | Cdc42ep5 | 361505 |
| 24.106274 | down | XM_001076282 | Cdh3     | 116777 |
| 2.8703873 | down | NM_053891    | Cdk5r1   | 116671 |
| 2.2555594 | down | XM_001068770 | Cdk6     | 114483 |
| 2.990148  | down | NM_130812    | Cdkn2b   | 25164  |
| 2.330163  | down | NM_001033860 | Ceacam1  | 81613  |
| 7.406398  | down | NM_173339    | Ceacam10 | 287009 |

|           |      |              |         |        |
|-----------|------|--------------|---------|--------|
| 5.3920817 | down | NM_012524    | Cebpa   | 24252  |
| 3.2409277 | down | NM_017095    | Cebpe   | 25410  |
| 28.98266  | down | XM_575656    | Cecr6   | 500307 |
| 2.8401763 | down | NM_001014163 | Cend1   | 361675 |
| 3.4025748 | down | NM_001017470 | Cep70   | 367153 |
| 3.0239246 | down | NM_133295    | Ces3    | 113902 |
| 19.304834 | down | XM_001071230 | Cetn1   | 84592  |
| 2.386891  | down | NM_212466    | Cfb     | 294257 |
| 3.5028121 | down | XM_001055310 | Cfc1    | 501121 |
| 6.864637  | down | NM_012525    | Cgm4    | 24257  |
| 2.0587811 | down | NM_198731    | Chdh    | 290551 |
| 17.673725 | down | NM_021655    | Chga    | 24258  |
| 8.024045  | down | XM_001055438 | Chic1   | 363484 |
| 4.1265473 | down | NM_001079689 | Chit1   | 289032 |
| 2.496862  | down | NM_001017466 | Chmp4c  | 361916 |
| 3.3441768 | down | NM_032084    | Chn2    | 84031  |
| 78.549614 | down | XM_001079984 | Chpt1   | 362866 |
| 2.1687083 | down | XM_001065852 | Chrdl2  | 308854 |
| 14.89401  | down | NM_031016    | Chrm2   | 81645  |
| 4.0281825 | down | NM_052805    | Chrna3  | 25101  |
| 10.131892 | down | XM_001079715 | Chst11  | 314694 |
| 2.1307368 | down | XM_001068489 | Chst14  | 691394 |
| 12.250862 | down | XM_001060886 | Chsy3   | 291577 |
| 2.278175  | down | XM_001060640 | Chtf18  | 287146 |
| 6.53576   | down | XM_001076412 | Chtf8   | 364996 |
| 2.8402138 | down | XM_001073489 | Ckap2   | 306575 |
| 2.4718957 | down | NM_001012738 | Ckmt1   | 29593  |
| 2.435586  | down | XM_579997    | Cks1b   | 499655 |
| 43.97428  | down | XM_001054024 | Cks2    | 498709 |
| 4.6286526 | down | XM_001074014 | Clcn6   | 295586 |
| 2.089676  | down | XM_001076934 | Cldn15  | 304388 |
| 8.298775  | down | NM_001008514 | Cldn19  | 298487 |
| 2.0265808 | down | XM_001054180 | Cldn2   | 300920 |
| 7.747135  | down | XM_001054648 | Cldn20  | 680178 |
| 12.569667 | down | XM_001059255 | Cldn22  | 306454 |
| 8.655304  | down | NM_001033062 | Cldn23  | 290789 |
| 8.2770605 | down | NM_001012022 | Cldn4   | 304407 |
| 29.033245 | down | NM_031702    | Cldn7   | 65132  |
| 2.9851632 | down | XM_213209    | Clec16a | 287044 |
| 2.3383348 | down | XM_001067934 | Clec1a  | 500337 |
| 17.26512  | down | NM_130402    | Clec2d  | 113937 |
| 6.0351114 | down | NM_001048075 | Clec2g  | 362447 |
| 2.595619  | down | NM_001005891 | Clec4a3 | 362431 |
| 7.483139  | down | XM_578404    | Clec7a  | 502902 |

|            |      |              |         |        |
|------------|------|--------------|---------|--------|
| 26.640688  | down | NM_001013080 | Clic3   | 296566 |
| 2.732417   | down | NM_176078    | Clic6   | 304081 |
| 2.151052   | down | NM_021997    | Clip2   | 29264  |
| 2.0260732  | down | NM_001006971 | Cln3    | 293485 |
| 3.1252105  | down | NM_013139    | Clps    | 25680  |
| 19.633879  | down | NM_001029914 | Cmtm1   | 291823 |
| 2.22543    | down | NM_001013142 | Cmtm2a  | 307616 |
| 2.0914018  | down | XM_001056147 | Cmtm5   | 290214 |
| 5.28338    | down | NM_053495    | Cnga3   | 85257  |
| 6.1246114  | down | NM_021686    | Cnksr2  | 59322  |
| 2.2467544  | down | NM_001012061 | Cnksr3  | 308113 |
| 4.5457454  | down | XM_001066271 | Cnot3   | 308311 |
| 2.9730325  | down | XM_341191    | Cnot6l  | 360917 |
| 4.44901    | down | NM_057118    | Cntn1   | 117258 |
| 2.3424609  | down | NM_012884    | Cntn2   | 25356  |
| 18.951796  | down | NM_013225    | Cntn6   | 27256  |
| 2.7775228  | down | XM_001076244 | Cntnap4 | 307865 |
| 4.8578253  | down | NM_001033889 | Cog7    | 293456 |
| 2.3890898  | down | XM_243912    | Col12a1 | 25683  |
| 2.394312   | down | XM_001056763 | Col13a1 | 499431 |
| 4.2460704  | down | XM_001062408 | Col16a1 | 366474 |
| 8.815141   | down | XM_001072793 | Col22a1 | 315071 |
| 13.7988405 | down | NM_181636    | Col23a1 | 353303 |
| 8.480946   | down | NM_198747    | Col27a1 | 298101 |
| 3.6075737  | down | NM_012929    | Col2a1  | 25412  |
| 15.433117  | down | XM_001053671 | Col9a2  | 362584 |
| 24.587725  | down | XM_001059028 | Col9a3  | 362285 |
| 16.656199  | down | XM_343396    | Commd4  | 363068 |
| 2.6126611  | down | NM_139108    | Commd5  | 245974 |
| 3.0060852  | down | NM_012834    | Comp    | 25304  |
| 30.405672  | down | XM_340887    | Copz2   | 360611 |
| 5.651601   | down | NM_001009671 | Coq10b  | 301416 |
| 2.3028634  | down | NM_053472    | Cox4i2  | 84683  |
| 2.5616982  | down | XM_001078870 | Cp110   | 361634 |
| 3.0749836  | down | NM_001013083 | Cpa2    | 296959 |
| 2.7477913  | down | XM_001074218 | Cpe     | 25669  |
| 30.111963  | down | NM_022864    | Cplx1   | 64832  |
| 5.5099325  | down | XM_001071808 | Cplx3   | 501005 |
| 8.040199   | down | XM_001080977 | Cpm     | 314855 |
| 2.3220234  | down | NM_001013963 | Cpped1  | 302890 |
| 5.195426   | down | XM_001075677 | Cpt1c   | 308579 |
| 13.426609  | down | XM_001081157 | Cpxm1   | 296156 |
| 4.628455   | down | NM_031766    | Cpz     | 83575  |
| 2.5569458  | down | NM_031017    | Creb1   | 81646  |

|           |      |              |          |        |
|-----------|------|--------------|----------|--------|
| 4.9697714 | down | NM_001007093 | Creb3l4  | 310616 |
| 3.1700466 | down | NM_001015027 | Crebl2   | 362453 |
| 2.6222692 | down | NM_001011710 | Crisp2   | 360445 |
| 36.400333 | down | XM_001072349 | Crocc    | 313663 |
| 17.57273  | down | NM_173140    | Cryba2   | 286925 |
| 2.2978086 | down | NM_173289    | Cryge    | 24279  |
| 5.56247   | down | NM_023981    | Csf1     | 78965  |
| 2.4671004 | down | XM_001074265 | Csf2     | 116630 |
| 5.745023  | down | NM_001037660 | Csf2ra   | 652957 |
| 2.982604  | down | NM_133652    | Cspg5    | 50568  |
| 10.979818 | down | NM_177425    | Csrp2    | 29317  |
| 3.628869  | down | NM_017074    | Cth      | 24962  |
| 2.2885792 | down | XM_232077    | Ctnna2   | 297357 |
| 2.2630067 | down | XM_001065193 | Cts7     | 290970 |
| 5.001489  | down | XM_001080387 | Ctu1     | 292847 |
| 6.2676554 | down | XM_001065365 | Ctxn1    | 29145  |
| 2.2232158 | down | XM_222184    | Cux2     | 288665 |
| 2.701942  | down | XM_001056781 | Cwf19l1  | 365465 |
| 15.867582 | down | NM_030845    | Cxcl1    | 81503  |
| 24.686623 | down | XM_342315    | Cyb561d1 | 362017 |
| 2.7665493 | down | XM_001073843 | Cyp11b1  | 500892 |
| 2.7630951 | down | NM_012538    | Cyp11b2  | 24294  |
| 13.749363 | down | XM_001070774 | Cyp2b12  | 29295  |
| 3.610439  | down | NM_031543    | Cyp2e1   | 25086  |
| 3.1590538 | down | NM_019303    | Cyp2f4   | 54246  |
| 2.4424937 | down | XM_001069311 | Cyp46a1  | 362782 |
| 29.750189 | down | XM_001074594 | Cys1     | 690489 |
| 2.0926576 | down | NM_001013980 | Cyyr1    | 304138 |
| 5.9973583 | down | XM_001068559 | Dapl1    | 362136 |
| 2.5459535 | down | XM_001058071 | Dcbld1   | 309773 |
| 3.7499325 | down | NM_130419    | Dcbld2   | 155696 |
| 2.7066712 | down | NM_138892    | Dctpp1   | 192252 |
| 3.317049  | down | XM_001068407 | Dda1     | 688813 |
| 2.167988  | down | XM_001077485 | Ddx19a   | 292022 |
| 3.894907  | down | XM_342582    | Ddx27    | 362274 |
| 5.2021084 | down | NM_171996    | Decr2    | 64461  |
| 2.0205834 | down | NM_001037503 | Defb13   | 641626 |
| 25.92068  | down | NM_001037504 | Defb14   | 641627 |
| 4.0360346 | down | NM_001037520 | Defb15   | 641645 |
| 5.256269  | down | NM_001037512 | Defb21   | 641636 |
| 2.7476768 | down | NM_022544    | Defb4    | 64389  |
| 2.5650456 | down | NM_001037511 | Defb40   | 641637 |
| 6.8527966 | down | XM_001056934 | Dfna5    | 353316 |
| 16.607439 | down | NM_001012146 | Dgcr2    | 360742 |

|           |      |              |         |        |
|-----------|------|--------------|---------|--------|
| 2.750359  | down | NM_019304    | Dgkb    | 54248  |
| 3.0968237 | down | NM_013126    | Dgkg    | 25666  |
| 3.2419262 | down | NM_001080148 | Dhcr24  | 298298 |
| 6.0548897 | down | XM_001076463 | Dhdh    | 691002 |
| 6.169422  | down | XM_001058220 | Dhdpsl  | 293949 |
| 2.3363988 | down | NM_017210    | Dio3    | 29475  |
| 2.2049415 | down | XM_001066151 | Dis3l2  | 367307 |
| 12.821172 | down | NM_001037654 | Dixdc1  | 363062 |
| 6.7758555 | down | XM_001077211 | Dkk2    | 295445 |
| 2.111922  | down | NM_138519    | Dkk3    | 171548 |
| 2.3920505 | down | XM_001080698 | Dkk1l   | 499150 |
| 7.5365996 | down | XM_001058879 | Dlg5    | 305645 |
| 10.916248 | down | NM_053744    | Dlk1    | 114587 |
| 3.2594864 | down | XM_001059233 | Dlx1    | 296500 |
| 2.1305072 | down | XM_001081314 | Dlx4    | 303469 |
| 2.5498018 | down | XM_233404    | Dmbx1   | 313512 |
| 2.6229434 | down | NM_001025288 | Dmrtc1a | 501668 |
| 4.912485  | down | XM_001080801 | Dnajc17 | 311329 |
| 2.4741287 | down | XM_001056836 | Dnajc6  | 313409 |
| 4.184282  | down | NM_001003957 | Dnmt3a  | 444984 |
| 4.4075227 | down | NM_001011937 | Doc2g   | 293654 |
| 5.939885  | down | XM_001068649 | Dock2   | 360509 |
| 6.7381663 | down | NM_001025416 | Dok1    | 312477 |
| 4.098395  | down | NM_001008287 | Donson  | 288257 |
| 4.276656  | down | XM_001071372 | Dot1l   | 362831 |
| 4.6214237 | down | NM_001011928 | Dpep2   | 291984 |
| 3.7377267 | down | NM_001015007 | Dph2    | 298452 |
| 2.1998708 | down | XM_001061312 | Dpp9    | 301130 |
| 7.1058497 | down | XM_001063497 | Dppa2   | 685364 |
| 21.854338 | down | NM_001047864 | Dppa3   | 297576 |
| 8.538472  | down | NM_023023    | Dpysl5  | 65208  |
| 2.2379718 | down | XM_001055011 | Dram    | 679937 |
| 3.7761781 | down | XM_001053969 | Dsc1    | 291759 |
| 2.0373554 | down | NM_133587    | Dscam   | 171119 |
| 7.318634  | down | NM_199490    | Dsg4    | 291754 |
| 2.382529  | down | XM_001070652 | Dtx2    | 304591 |
| 4.6603107 | down | XM_001081001 | Duoxa1  | 311374 |
| 2.1799474 | down | XM_001060408 | Dusp15  | 362238 |
| 6.4130483 | down | XM_001070874 | Dusp7   | 300980 |
| 22.894947 | down | XM_224643    | Duxbl   | 306226 |
| 2.9754574 | down | XM_001059597 | Dvl3    | 303811 |
| 8.722816  | down | XM_214529    | Dym     | 291433 |
| 17.348938 | down | NM_001024767 | Dyrk3   | 304775 |
| 4.1054854 | down | NM_153303    | Dyt1    | 266606 |

|           |      |              |          |        |
|-----------|------|--------------|----------|--------|
| 3.7711966 | down | NM_001007010 | Dyx1c1   | 363096 |
| 15.738486 | down | NM_001009534 | Eapa2    | 494321 |
| 4.506179  | down | XM_001068246 | Ebf2     | 361060 |
| 3.8173687 | down | XM_001056705 | Ebf3     | 361668 |
| 2.0700388 | down | XM_001070886 | Echdc3   | 684538 |
| 65.2443   | down | XM_001064110 | Ecop     | 362374 |
| 2.33015   | down | XM_574055    | Edaradd  | 498769 |
| 2.577789  | down | XM_001080460 | Eea1     | 314764 |
| 5.2135673 | down | NM_001013972 | Efcab3   | 303589 |
| 2.1120434 | down | XM_574979    | Efna3    | 170901 |
| 20.990429 | down | XM_001079433 | Efnb3    | 360546 |
| 2.3848312 | down | XM_001056024 | Efs      | 290212 |
| 9.038573  | down | NM_001004070 | Egfl8    | 406166 |
| 2.296704  | down | NM_031599    | Eif2ak3  | 29702  |
| 7.306846  | down | XM_001063995 | Eif5a2   | 310261 |
| 3.2337651 | down | NM_001077651 | Elavl4   | 432358 |
| 2.8659167 | down | NM_001024768 | Elf3     | 304815 |
| 8.189933  | down | XM_001074045 | Elfn1    | 288512 |
| 4.156267  | down | XM_001059832 | Elk4     | 304786 |
| 6.653345  | down | XM_001076941 | Elp4     | 691133 |
| 4.260834  | down | XM_001069605 | Emilin3  | 362262 |
| 6.1815815 | down | XM_001069752 | Eml1     | 362783 |
| 5.4086585 | down | NM_138921    | Eml2     | 192360 |
| 11.086223 | down | XM_001064022 | Eml5     | 444982 |
| 5.2193    | down | NM_139325    | Eno2     | 24334  |
| 3.5158587 | down | XM_001080308 | Enpep    | 64017  |
| 6.779991  | down | XM_001065686 | Enthd1   | 685900 |
| 3.3918953 | down | NM_022587    | Entpd1   | 64519  |
| 2.4496026 | down | NM_172090    | Epb4.111 | 59317  |
| 8.483817  | down | NM_053927    | Epb4.113 | 116724 |
| 4.3807197 | down | XM_233522    | Epha10   | 298528 |
| 7.7031646 | down | XM_001069612 | Ephb2    | 313633 |
| 8.297541  | down | NM_021852    | Epn2     | 60443  |
| 3.7284026 | down | XM_001071045 | Eps8l1   | 361503 |
| 3.617979  | down | XM_001061258 | Eps8l2   | 361674 |
| 2.6411521 | down | NM_001044257 | Epsti1   | 498547 |
| 4.4067245 | down | NM_021687    | Erbp4    | 59323  |
| 9.94295   | down | XM_001077374 | Ercc4l1  | 360465 |
| 3.0947804 | down | XM_217387    | Ercc5    | 301382 |
| 14.819641 | down | XM_001077208 | Erf      | 292721 |
| 7.123366  | down | XM_001079523 | Ern2     | 365363 |
| 3.9991803 | down | NM_019622    | Espn     | 56227  |
| 11.085952 | down | NM_012754    | Esr2     | 25149  |
| 5.7050667 | down | XM_001079212 | Etv2     | 361544 |



|           |      |              |            |        |
|-----------|------|--------------|------------|--------|
| 2.510813  | down | NM_024147    | Ev1        | 79115  |
| 22.035696 | down | XM_001073624 | Extl2      | 310803 |
| 8.849673  | down | XM_001077628 | Fa2h       | 307855 |
| 2.5841484 | down | NM_145878    | Fabp5      | 140868 |
| 3.3408945 | down | NM_017098    | Fabp6      | 25440  |
| 3.4666529 | down | NM_152937    | Fadd       | 266610 |
| 2.2357361 | down | NM_001025034 | Fam107b    | 498796 |
| 3.253028  | down | NM_001012348 | Fam113a    | 296158 |
| 3.791264  | down | XM_573600    | Fam114a1   | 498366 |
| 2.6715755 | down | XM_001056810 | Fam114a1l1 | 316729 |
| 23.764214 | down | XM_001081251 | Fam117a    | 497983 |
| 13.583667 | down | XM_343576    | Fam117b    | 363236 |
| 6.019179  | down | XM_001068090 | FAM120C    | 317423 |
| 2.5924416 | down | XM_001080165 | Fam125b    | 362118 |
| 9.08209   | down | XM_001076007 | Fam131c    | 690880 |
| 3.3550284 | down | XM_574844    | Fam159b    | 499520 |
| 3.7741618 | down | NM_001013876 | Fam161a    | 289833 |
| 12.206794 | down | XM_001062665 | Fam163b    | 685169 |
| 2.3391495 | down | NM_001014079 | Fam164c    | 314321 |
| 2.0015473 | down | XM_001067261 | Fam168a    | 361614 |
| 31.712778 | down | XM_001073605 | Fam168b    | 690188 |
| 7.291968  | down | XM_001059420 | Fam169b    | 680906 |
| 12.617564 | down | XM_001054549 | Fam170a    | 498864 |
| 3.069267  | down | XM_215438    | Fam172a    | 294606 |
| 4.469436  | down | NM_001009633 | Fam175a    | 289468 |
| 2.6586232 | down | XM_001058964 | Fam184b    | 289671 |
| 33.506763 | down | XM_001061851 | Fam186a    | 684999 |
| 2.4927456 | down | XM_001071695 | Fam189b    | 310640 |
| 2.13344   | down | XM_001058142 | Fam19a2    | 680647 |
| 39.829407 | down | XM_001066663 | Fam47e     | 686140 |
| 3.4532125 | down | XM_001054307 | Fam53b     | 309060 |
| 4.0615644 | down | XM_001074776 | Fam60a     | 686611 |
| 52.502354 | down | XM_001080097 | Fam64a     | 360559 |
| 8.119119  | down | XM_001061354 | Fam69c     | 498891 |
| 2.978505  | down | NM_182822    | Fam70a     | 313453 |
| 27.379078 | down | NM_001025031 | Fam71b     | 497888 |
| 6.4529295 | down | XM_001079857 | Fam78a     | 499776 |
| 2.545409  | down | XM_001079852 | Fam83e     | 292913 |
| 12.856745 | down | XM_001064041 | Fam90a9    | 685497 |
| 2.3825936 | down | NM_139194    | Fas        | 246097 |
| 16.284864 | down | NM_012908    | Faslg      | 25385  |
| 3.5832815 | down | XM_001078267 | Fbln1      | 315191 |
| 2.2645037 | down | XM_222254    | Fbrs11     | 304572 |
| 3.370569  | down | NM_001025700 | Fbxl12     | 313782 |

|            |      |              |        |        |
|------------|------|--------------|--------|--------|
| 5.4873953  | down | XM_001066947 | Fbxl15 | 309453 |
| 8.35477    | down | NM_001009504 | Fbxl16 | 494223 |
| 6.448369   | down | NM_053511    | Fbxo2  | 85273  |
| 13.0588455 | down | XM_341091    | Fbxo21 | 360818 |
| 2.9783611  | down | NM_001025642 | Fbxo46 | 292686 |
| 3.0073562  | down | XM_001075538 | Fbxw12 | 301015 |
| 5.9303713  | down | NM_001033924 | Fcer2  | 171075 |
| 8.84156    | down | XM_001066113 | Fchsd1 | 307482 |
| 17.493586  | down | XM_001058446 | Fcrl3  | 680697 |
| 13.877909  | down | XM_001076361 | Fermt3 | 309186 |
| 6.792819   | down | XM_001066375 | Fes    | 361597 |
| 2.6241705  | down | XM_001060067 | Fezf2  | 305719 |
| 4.6964006  | down | NM_020071    | Fgb    | 24366  |
| 3.0906937  | down | NM_139263    | Fgd4   | 246174 |
| 15.267709  | down | NM_012951    | Fgf10  | 25443  |
| 2.331703   | down | NM_130814    | Fgf12  | 170630 |
| 14.683368  | down | NM_021867    | Fgf16  | 60464  |
| 2.2695982  | down | NM_019199    | Fgf18  | 29369  |
| 44.650818  | down | NM_019305    | Fgf2   | 54250  |
| 2.0544565  | down | NM_053809    | Fgf4   | 116499 |
| 2.7986188  | down | NM_131908    | Fgf6   | 170700 |
| 2.0745854  | down | NM_022182    | Fgf7   | 29348  |
| 3.6610868  | down | XM_001077810 | Fgfr2  | 25022  |
| 4.293002   | down | NM_001044268 | Fhad1  | 500577 |
| 2.3835807  | down | NM_031677    | Fhl2   | 63839  |
| 13.485502  | down | XM_001079844 | Fibcd1 | 311861 |
| 2.1779747  | down | XM_575589    | Figla  | 500239 |
| 2.6467535  | down | NM_001014120 | Fkbp10 | 360627 |
| 3.0530272  | down | NM_001013105 | Fkbp11 | 300211 |
| 3.7736354  | down | NM_001013210 | Fkbp14 | 362366 |
| 2.2688205  | down | XM_001057312 | Fkbp15 | 362528 |
| 5.006181   | down | XM_001065788 | Fkbp7  | 295672 |
| 2.0938075  | down | NM_001025678 | Fkrp   | 308390 |
| 19.00014   | down | XM_001054999 | Flg    | 24641  |
| 4.1972675  | down | XM_001060505 | Fndc5  | 260327 |
| 7.9142556  | down | NM_012953    | Fosl1  | 25445  |
| 3.473748   | down | NM_012742    | Foxa1  | 25098  |
| 4.449269   | down | XM_001078067 | Foxb2  | 691398 |
| 26.217428  | down | XM_001079064 | Foxc2  | 171356 |
| 2.4496083  | down | XM_233422    | Foxd2  | 313504 |
| 33.97038   | down | XM_001055972 | Foxd4  | 252886 |
| 7.648394   | down | XM_001068320 | Foxi3  | 502846 |
| 5.3086033  | down | XM_001080864 | Foxn1  | 287469 |
| 5.1497536  | down | XM_001080414 | Foxn4  | 288736 |

|            |      |              |         |        |
|------------|------|--------------|---------|--------|
| 6.4873314  | down | XM_001064339 | Foxp4   | 363185 |
| 2.452566   | down | NM_022858    | Foxq1   | 64826  |
| 8.878513   | down | XM_001078256 | Fpgs    | 687266 |
| 7.0324125  | down | XM_001058050 | Fpr2l   | 681706 |
| 37.854576  | down | XM_001064148 | Frg2b   | 685524 |
| 5.1490593  | down | XM_001071750 | Frmd4a  | 307128 |
| 2.4779112  | down | XM_001077268 | Frmd4b  | 252858 |
| 5.488242   | down | NM_001017382 | Frs3    | 316213 |
| 2.2570195  | down | NM_001004232 | Fscn3   | 296947 |
| 6.5910773  | down | XM_238588    | Fsd1    | 301506 |
| 2.7324162  | down | XM_001056728 | Fsip2   | 680337 |
| 2.0910313  | down | NM_024369    | Fstl1   | 79210  |
| 2.153344   | down | NM_001012014 | Ftsj3   | 303608 |
| 3.3928618  | down | NM_001012360 | fut10   | 497619 |
| 4.0316267  | down | NM_173308    | Fut11   | 286971 |
| 4.471944   | down | NM_031635    | Fut2    | 58924  |
| 11.325842  | down | NM_145717    | Fxyd2   | 29639  |
| 6.025684   | down | XM_001054436 | Fyb     | 499537 |
| 2.5663202  | down | NM_012755    | Fyn     | 25150  |
| 2.1255345  | down | NM_153474    | Fzd3    | 266715 |
| 4.3849554  | down | NM_173838    | Fzd5    | 317674 |
| 6.324716   | down | XM_001069570 | Fzd7    | 301440 |
| 19.506899  | down | NM_001009632 | G0s2    | 289388 |
| 4.7947736  | down | NM_053417    | Gab2    | 84477  |
| 4.5736957  | down | XM_001053889 | Gabpb11 | 364738 |
| 2.4889445  | down | NM_017065    | Gabrb3  | 24922  |
| 13.967577  | down | NM_017291    | Gabrr1  | 29694  |
| 23.187233  | down | NM_138897    | Gabrr3  | 192258 |
| 4.5564027  | down | NM_080783    | Gale    | 114860 |
| 85.693504  | down | XM_001053341 | Galntl1 | 362760 |
| 12.099077  | down | XM_001061731 | Galntl2 | 306268 |
| 2.094732   | down | XM_001054513 | Galntl6 | 361142 |
| 8.853339   | down | XM_001066435 | Gapt    | 686075 |
| 27.596952  | down | XM_001068014 | Gas2l1  | 360973 |
| 5.0831933  | down | NM_033442    | Gata2   | 25159  |
| 10.45043   | down | NM_133293    | Gata3   | 85471  |
| 2.5937562  | down | NM_144730    | Gata4   | 54254  |
| 2.9147847  | down | NM_001013881 | Gatad2a | 290669 |
| 5.6130924  | down | XM_001060894 | Gbx1    | 246149 |
| 4.130013   | down | NM_012565    | Gck     | 24385  |
| 15.4753895 | down | NM_001014211 | Gcom1   | 363091 |
| 2.4187193  | down | NM_021672    | Gdf9    | 59304  |
| 4.523665   | down | NM_012959    | Gfra1   | 25454  |
| 7.420499   | down | NM_001013065 | Ggn     | 292765 |

|           |      |              |         |        |
|-----------|------|--------------|---------|--------|
| 4.7688837 | down | NM_019235    | Ggt5    | 29566  |
| 2.077402  | down | XM_001081466 | Ghdc    | 303542 |
| 14.719739 | down | NM_001034849 | Gimap1  | 312312 |
| 2.5553222 | down | NM_145680    | Gimap5  | 246774 |
| 11.67204  | down | XM_001078890 | Gins2   | 292058 |
| 2.1446757 | down | NM_133563    | Giot1   | 171090 |
| 2.2227073 | down | NM_019630    | Gip     | 25040  |
| 3.4484186 | down | XM_001063402 | Gja10   | 313126 |
| 25.671972 | down | XM_001054584 | Glipr2  | 679819 |
| 14.30508  | down | XM_001066448 | Glis1   | 298732 |
| 3.9701812 | down | NM_022278    | Glrx1   | 64045  |
| 2.9288938 | down | XM_001065700 | Glt25d1 | 290637 |
| 3.0763764 | down | XM_001070927 | Glt25d2 | 289081 |
| 5.7193117 | down | XM_001054574 | Gm672   | 364900 |
| 3.7626085 | down | XM_001070048 | Gmip    | 306357 |
| 23.604225 | down | NM_021858    | Gnb3    | 60449  |
| 6.3928566 | down | NM_139185    | Gng8    | 245986 |
| 20.580946 | down | XM_001072812 | Gnpnat1 | 498486 |
| 4.056334  | down | XM_001081063 | Gns     | 299825 |
| 7.314615  | down | XM_001060893 | Golga1  | 311919 |
| 5.8776684 | down | NM_022596    | Golga2  | 64528  |
| 3.660437  | down | XM_001064007 | Golsyn  | 500865 |
| 2.1633427 | down | XM_001074030 | Golt1b  | 362460 |
| 2.0364935 | down | NM_053930    | Gp1bb   | 116727 |
| 2.6644547 | down | NM_001007013 | Gphb5   | 366668 |
| 6.0785666 | down | NM_181770    | Gpr119  | 302813 |
| 6.514622  | down | XM_001058657 | Gpr123  | 309097 |
| 3.9412491 | down | XM_001073056 | Gpr132  | 314480 |
| 26.982615 | down | XM_001064191 | Gpr162  | 362436 |
| 5.197465  | down | XM_001075182 | Gpr172b | 362942 |
| 4.80222   | down | XM_001080723 | Gpr176  | 117257 |
| 4.079625  | down | XM_001054002 | Gpr183  | 679975 |
| 7.8570023 | down | NM_022216    | Gpr20   | 60667  |
| 10.062853 | down | NM_057201    | Gpr37   | 117549 |
| 2.6262329 | down | XM_001060511 | Gpr45   | 301372 |
| 3.733049  | down | XM_001055077 | Gpr52   | 680192 |
| 4.306576  | down | NM_152242    | Gpr56   | 260326 |
| 2.3311088 | down | XM_001066164 | Gpr75   | 498434 |
| 3.1509044 | down | NM_001003974 | Gpsm3   | 406163 |
| 2.8865848 | down | XM_574039    | Gpx5    | 113919 |
| 2.7719367 | down | XM_001060175 | Gpx7    | 298376 |
| 3.3079958 | down | NM_001034944 | Grap2   | 366962 |
| 2.5206437 | down | NM_138894    | Grasp   | 192254 |
| 9.320332  | down | NM_019282    | Grem1   | 50566  |

|            |      |              |           |        |
|------------|------|--------------|-----------|--------|
| 13.1405945 | down | XM_001068377 | Grhl3     | 298555 |
| 4.054878   | down | NM_057187    | Grfin     | 117130 |
| 16.947485  | down | NM_181373    | Grik3     | 298521 |
| 6.9988503  | down | NM_012572    | Grik4     | 24406  |
| 7.068731   | down | NM_017262    | Grik5     | 24407  |
| 4.019495   | down | NM_133308    | Grin3b    | 170796 |
| 8.622385   | down | XM_001053080 | Grif1-ps1 | 678709 |
| 13.552975  | down | XM_001062001 | Grm3      | 24416  |
| 11.6129875 | down | XM_001071059 | Grpcb     | 360395 |
| 4.512591   | down | XM_001066936 | Grrp1     | 500563 |
| 17.403383  | down | NM_001013166 | Gsg1      | 312793 |
| 2.3130774  | down | XM_001057027 | Gspt2     | 501582 |
| 3.9849594  | down | NM_022284    | Guca2b    | 64055  |
| 2.2102482  | down | NM_153468    | Gzma      | 266708 |
| 7.914151   | down | NM_138517    | Gzmb      | 171528 |
| 5.011134   | down | NM_134332    | Gzmc      | 171290 |
| 3.3050406  | down | NM_153466    | Gzmf      | 266704 |
| 9.522507   | down | XM_001075299 | H1fx      | 500252 |
| 4.020607   | down | XM_001066891 | H2afx     | 500987 |
| 19.010405  | down | XM_001056152 | H2afy2    | 361844 |
| 2.2635677  | down | NM_053493    | Hacl1     | 85255  |
| 5.405161   | down | XM_001060358 | Haghl     | 302995 |
| 14.558945  | down | NM_022696    | Hand2     | 64637  |
| 2.7162488  | down | XM_001081256 | Hao1      | 311446 |
| 6.014529   | down | NM_001008559 | Hapln3    | 308773 |
| 6.019471   | down | NM_172323    | Has1      | 282821 |
| 4.6778755  | down | NM_001008890 | Hbe1      | 293267 |
| 7.1709514  | down | NM_001005900 | Hcst      | 474146 |
| 3.3455818  | down | NM_001025409 | Hdac1     | 297893 |
| 2.8851902  | down | XM_001073226 | Hdac11    | 297453 |
| 6.315763   | down | XM_001059685 | Hdac11    | 84576  |
| 4.0193663  | down | XM_001054796 | Hdac7     | 84582  |
| 14.37479   | down | NM_133549    | Hdgfl1    | 171074 |
| 24.879353  | down | XM_001056925 | Hdhd1a    | 291585 |
| 3.8685188  | down | XM_001081620 | Helz      | 287773 |
| 4.5081797  | down | NM_001013179 | Hes6      | 316626 |
| 4.9521627  | down | XM_001079254 | Hes7      | 287423 |
| 3.1509929  | down | XM_001081535 | Hexim2    | 303580 |
| 3.4200702  | down | XM_342216    | Hey1      | 155437 |
| 4.443264   | down | XM_001058425 | Hey2      | 155430 |
| 13.816539  | down | XM_001055126 | Heyl      | 313575 |
| 7.149685   | down | XM_221303    | Hic2      | 287940 |
| 3.44816    | down | XM_001062714 | Hist1h2ac | 306962 |
| 9.220332   | down | XM_001071473 | Hist1h2ah | 502125 |

|           |      |              |            |        |
|-----------|------|--------------|------------|--------|
| 6.4978766 | down | XM_001061350 | Hist1h2ai  | 502129 |
| 2.9503407 | down | NM_001013056 | Hist1h2ail | 291159 |
| 3.169988  | down | XM_001058007 | Hist1h2ak  | 680615 |
| 2.9854267 | down | XM_001061635 | Hist1h2an  | 306970 |
| 5.1272893 | down | XM_001061734 | Hist1h2ao  | 364723 |
| 2.9052703 | down | XM_001057941 | Hist1h3g   | 680599 |
| 3.1353414 | down | NM_022686    | Hist1h4b   | 64627  |
| 2.13909   | down | XM_001061900 | Hist1h4m   | 291152 |
| 2.664784  | down | XM_001061850 | Hist2h2ac  | 499675 |
| 4.083617  | down | XM_001059351 | Hist2h2bb  | 295278 |
| 5.8065324 | down | XM_001055051 | Hist2h3c   | 679950 |
| 11.885053 | down | XM_001062251 | Hist2h3c2  | 310678 |
| 6.666092  | down | XM_001062199 | Hist2h4    | 295277 |
| 13.833487 | down | NM_021840    | Hist3h2a   | 64646  |
| 18.815746 | down | XM_001053243 | Hivep3     | 313557 |
| 18.534754 | down | XM_001070255 | Hmcn1      | 289094 |
| 2.7601879 | down | XM_001067527 | Hmcn2      | 686132 |
| 12.9447   | down | NM_032070    | Hmga2      | 84017  |
| 19.58648  | down | XM_001054623 | Hmgb2      | 29395  |
| 2.3303754 | down | NM_001013184 | Hmgn1      | 360704 |
| 2.9476204 | down | XM_001073188 | Hmha1      | 314618 |
| 24.987713 | down | NM_012669    | Hnf1a      | 24817  |
| 2.1095374 | down | NM_152849    | Homez      | 260325 |
| 2.3875277 | down | XM_001054663 | Hook1      | 313370 |
| 35.717987 | down | NM_133621    | Hopx       | 171160 |
| 23.526966 | down | XM_575481    | Hoxa13     | 500129 |
| 8.756385  | down | NM_012581    | Hoxa2      | 24452  |
| 8.719842  | down | XM_220896    | Hoxb1      | 303491 |
| 3.1937227 | down | XM_001081336 | Hoxb13     | 303480 |
| 3.1062312 | down | XM_001081342 | Hoxb3      | 303488 |
| 2.935354  | down | XM_345881    | Hoxc11     | 366996 |
| 14.687344 | down | XM_001068426 | Hoxc13     | 315337 |
| 2.5927312 | down | XM_235702    | Hoxc5      | 315341 |
| 3.460925  | down | XM_001064329 | Hoxd1      | 288151 |
| 4.8949127 | down | XM_213633    | Hoxd3      | 288152 |
| 35.720997 | down | NM_017122    | Hpca       | 29177  |
| 2.2419927 | down | XM_001071788 | Hs1bp3     | 313950 |
| 2.2444942 | down | XM_001079125 | Hs2st1     | 292155 |
| 3.3249786 | down | XM_001061473 | Hs3st5     | 294449 |
| 7.9657474 | down | XM_001078574 | Hs6st3     | 364476 |
| 2.6979325 | down | NM_017080    | Hsd11b1    | 25116  |
| 2.9235086 | down | NM_001009684 | Hsd17b13   | 305150 |
| 2.7145605 | down | XM_001079257 | Hsf2bp     | 499413 |
| 3.674394  | down | XM_001063049 | Hspa4l     | 294993 |

|           |      |              |          |        |
|-----------|------|--------------|----------|--------|
| 2.2268267 | down | NM_139261    | Hspbp1   | 246146 |
| 4.0864716 | down | NM_012852    | Htr1d    | 25323  |
| 3.59598   | down | NM_024365    | Htr6     | 64354  |
| 22.186857 | down | XM_344185    | Iars2    | 364070 |
| 17.834438 | down | NM_012587    | Ibsp     | 24477  |
| 4.913451  | down | NM_013058    | Id3      | 25585  |
| 7.0647554 | down | XM_577595    | Idi2     | 502143 |
| 2.4382696 | down | NM_001025041 | Ier5l    | 499772 |
| 8.62179   | down | XM_001065459 | Iffo1    | 362437 |
| 7.4445024 | down | XM_001079914 | Ifi44l   | 310968 |
| 15.645349 | down | XM_001075191 | Igdcc3   | 315759 |
| 2.5171053 | down | XM_001076376 | Igdcc4   | 363081 |
| 9.32524   | down | NM_013122    | Igfbp2   | 25662  |
| 4.2510934 | down | NM_001004274 | Igfbp4   | 360622 |
| 13.636884 | down | XM_341798    | Igfl3    | 361516 |
| 4.242663  | down | NM_001013945 | Ighg     | 299354 |
| 2.007353  | down | XM_001066340 | Igsf2    | 310727 |
| 3.2077398 | down | XM_227520    | Igsf3    | 295325 |
| 3.05018   | down | XM_001058036 | Ikbke    | 363984 |
| 3.4619627 | down | NM_199103    | Ikbkg    | 309295 |
| 6.1711802 | down | XM_001054364 | Ikzf2    | 301476 |
| 4.098453  | down | NM_145789    | Il13ra1  | 252963 |
| 14.173477 | down | XM_001079675 | Il17d    | 691799 |
| 20.298407 | down | XM_001063391 | Il17rb   | 306247 |
| 2.9918394 | down | XM_001078782 | Il17rc   | 297520 |
| 2.1053984 | down | NM_053374    | Il18bp   | 84388  |
| 19.59212  | down | XM_001077078 | Il1f5    | 311783 |
| 2.529716  | down | XM_001077066 | Il1f8    | 362076 |
| 3.0684068 | down | NM_012968    | Il1rap   | 25466  |
| 2.3235013 | down | NM_177935    | Il1rapl1 | 317553 |
| 2.6115758 | down | NM_053836    | Il2      | 116562 |
| 4.1228843 | down | XM_001060362 | Il20     | 681112 |
| 3.7071714 | down | XM_576228    | Il22     | 500836 |
| 2.1081553 | down | NM_130410    | Il23a    | 155140 |
| 3.6290896 | down | NM_133380    | Il4ra    | 25084  |
| 3.7242372 | down | NM_012589    | Il6      | 24498  |
| 16.272247 | down | XM_001060982 | Illdr1   | 303914 |
| 5.658124  | down | XM_001055452 | Inadl    | 313382 |
| 6.6257887 | down | XM_001080838 | Ino80    | 296084 |
| 3.9175978 | down | NM_133562    | Inpp5j   | 171088 |
| 7.9807816 | down | NM_019130    | Ins2     | 24506  |
| 4.544123  | down | XM_001079190 | Insm2    | 314131 |
| 4.8500843 | down | NM_001047904 | Ints6    | 361057 |
| 3.9978495 | down | XM_001067002 | Ints7    | 289382 |

|            |      |              |        |        |
|------------|------|--------------|--------|--------|
| 2.1608407  | down | XM_001056122 | Invs   | 313228 |
| 11.514593  | down | XM_226752    | Ipo11  | 310056 |
| 3.0995722  | down | XM_001073653 | Iqce   | 304318 |
| 11.2973795 | down | XM_001073634 | Iqcf1  | 503227 |
| 10.046645  | down | NM_001025153 | Iqcf3  | 501050 |
| 3.1046987  | down | NM_001008722 | Irf8   | 292060 |
| 5.9799957  | down | XM_001076309 | Irs2   | 29376  |
| 3.8101485  | down | NM_032074    | Irs3   | 84021  |
| 6.366266   | down | XM_001057357 | Irx1   | 306659 |
| 2.587284   | down | XM_001061997 | Irx3   | 307721 |
| 2.121976   | down | NM_001014242 | Isoc1  | 364879 |
| 2.5822453  | down | XM_001061626 | Itfg3  | 360502 |
| 9.85307    | down | XM_001070203 | Itga5  | 315346 |
| 3.2309256  | down | XM_001067562 | Itgb7  | 25713  |
| 2.2902827  | down | NM_001017505 | Itgb11 | 498564 |
| 8.420692   | down | NM_017351    | Itih3  | 50693  |
| 10.390746  | down | XM_001058872 | Itpk1  | 500709 |
| 17.669123  | down | NM_031045    | Itpka  | 81677  |
| 2.0200698  | down | NM_031046    | Itp2   | 81678  |
| 6.9360538  | down | NM_022195    | Ivl    | 60583  |
| 2.4639213  | down | NM_019147    | Jag1   | 29146  |
| 2.5031683  | down | XM_001073124 | Jag2   | 29147  |
| 9.004467   | down | NM_001003711 | Jph4   | 445271 |
| 8.009029   | down | NM_138875    | Jund   | 24518  |
| 36.118233  | down | NM_001008813 | Kb23   | 407759 |
| 13.852383  | down | XM_236723    | Kbtbd5 | 316088 |
| 2.5858958  | down | XM_001076969 | Kbtbd8 | 500262 |
| 6.3321395  | down | NM_173095    | Kcna1  | 24520  |
| 2.1980379  | down | NM_012972    | Kcna5  | 25470  |
| 4.5248346  | down | NM_017303    | Kcnab1 | 29737  |
| 5.9871745  | down | NM_139217    | Kcnc2  | 246153 |
| 2.9916852  | down | XM_001063865 | Kcnd1  | 116695 |
| 2.151941   | down | NM_133603    | Kcne2  | 171138 |
| 2.1658273  | down | NM_212526    | Kcne4  | 367302 |
| 7.5976577  | down | NM_032462    | Kcnip3 | 65199  |
| 2.3508701  | down | NM_133321    | Kcnj15 | 170847 |
| 8.102123   | down | NM_053806    | Kcnk6  | 116491 |
| 5.416419   | down | NM_053405    | Kcnk9  | 84429  |
| 9.402325   | down | NM_019273    | Kcnmb1 | 29747  |
| 14.750075  | down | XM_227040    | Kcnmb3 | 310303 |
| 14.022831  | down | NM_133322    | Kcnq2  | 170848 |
| 23.871393  | down | NM_021853    | Kcnt1  | 60444  |
| 4.8100433  | down | XM_001064164 | Kcp    | 296952 |
| 4.327476   | down | XM_001062225 | Kctd1  | 291772 |



|           |      |              |           |        |
|-----------|------|--------------|-----------|--------|
| 6.837943  | down | XM_001077040 | Kctd15    | 499129 |
| 5.088406  | down | XM_001066967 | Kctd3     | 305055 |
| 2.562041  | down | NM_001025123 | Kdelc2    | 315664 |
| 11.796368 | down | XM_235478    | Kdelr3    | 315131 |
| 7.997618  | down | XM_001068749 | Kdm2a     | 361700 |
| 5.926503  | down | XM_001068791 | Kel       | 297025 |
| 6.0912733 | down | XM_001080530 | Kera      | 314771 |
| 2.819424  | down | XM_001069525 | Khdc1b    | 689101 |
| 5.6477075 | down | XM_001058042 | Kif12     | 313254 |
| 5.8313036 | down | NM_145877    | Kif1c     | 113886 |
| 2.3190806 | down | XM_001061764 | Kif20a    | 361308 |
| 13.146506 | down | XM_001073723 | Kif23     | 315740 |
| 11.740578 | down | XM_001061158 | Kif26b    | 305012 |
| 3.0963805 | down | XM_215883    | Kif3b     | 296284 |
| 3.8548121 | down | NM_198752    | KIFC2     | 300053 |
| 2.8125086 | down | NM_053394    | Klf5      | 84410  |
| 3.379196  | down | XM_001071689 | Klf7      | 363243 |
| 7.3967466 | down | XM_001055437 | Klhl34    | 302703 |
| 4.6288347 | down | XM_218953    | Klhl35    | 308850 |
| 3.947486  | down | NM_001005382 | Klk1      | 292855 |
| 40.203278 | down | NM_031523    | Klk1b3    | 24594  |
| 66.81084  | down | XM_001080426 | Klk7      | 292852 |
| 4.0057735 | down | NM_001013888 | Klkb14    | 291846 |
| 46.47709  | down | NM_175759    | Klks3     | 292868 |
| 6.8687243 | down | NM_198746    | Klra5     | 297666 |
| 2.603196  | down | NM_001010964 | Klrb1a    | 362443 |
| 3.8017027 | down | NM_031649    | Klrg1     | 58975  |
| 5.0606747 | down | NM_139187    | Klrh1     | 246043 |
| 2.9669492 | down | NM_001004021 | Krt13     | 287699 |
| 5.1571116 | down | NM_001004022 | Krt15     | 287700 |
| 9.667218  | down | NM_053976    | Krt18     | 294853 |
| 36.179276 | down | NM_001004131 | Krt24     | 287675 |
| 4.5314617 | down | NM_001008822 | Krt25     | 303519 |
| 2.999144  | down | NM_001008824 | Krt27     | 450229 |
| 4.144241  | down | NM_001008758 | Krt34     | 303528 |
| 17.252165 | down | NM_001008809 | Krt72     | 406227 |
| 14.925727 | down | XM_001057910 | Krt73     | 300248 |
| 3.5503294 | down | XM_001060532 | Krt83     | 681126 |
| 26.398386 | down | XM_001055744 | Krtap1-3  | 680104 |
| 24.913305 | down | NM_001025135 | Krtap1-5  | 497995 |
| 54.406693 | down | XM_001056757 | Krtap16-5 | 680703 |
| 50.936672 | down | XM_001063382 | Krtap19-3 | 685333 |
| 97.1236   | down | XM_001063981 | Krtap21-2 | 685485 |
| 50.113308 | down | XM_577124    | Krtap2-4  | 501720 |

|           |      |              |            |        |
|-----------|------|--------------|------------|--------|
| 2.2937143 | down | XM_001057263 | Krtap31-1  | 680454 |
| 38.97253  | down | XM_001055517 | Krtap3-311 | 680060 |
| 16.549788 | down | XM_001056094 | Krtap4-7   | 680195 |
| 30.835663 | down | XM_001063784 | Krtap5-5   | 685436 |
| 48.410484 | down | XM_001072481 | Krtap6-2   | 498056 |
| 19.835638 | down | XM_001057319 | Krtap9-5   | 680468 |
| 7.966753  | down | XM_001065035 | Lace1      | 502479 |
| 2.7727468 | down | NM_212513    | Lag3       | 297596 |
| 4.6477847 | down | XM_001069930 | Lamb3      | 305078 |
| 5.953803  | down | XM_001079850 | Lamc3      | 311862 |
| 2.2392075 | down | NM_030853    | Lat        | 81511  |
| 4.8473086 | down | XM_218062    | Lats1      | 308265 |
| 2.7585254 | down | XM_001075793 | Lbxcor1    | 315748 |
| 30.616093 | down | XM_001066061 | Lce1d      | 685981 |
| 37.91591  | down | XM_001056303 | Lce1f      | 499663 |
| 54.560337 | down | XM_001066620 | Lce1l      | 686125 |
| 40.59836  | down | XM_001066389 | Lce1s      | 686064 |
| 4.231949  | down | NM_017266    | Ldhc       | 29634  |
| 5.383965  | down | XM_001067557 | Ldlrap1    | 500564 |
| 15.269066 | down | XM_001055597 | Ldoc1      | 367956 |
| 3.9970977 | down | XM_001078075 | Ldoc1l     | 300114 |
| 2.9052196 | down | NM_130429    | Lef1       | 161452 |
| 4.638454  | down | XM_001061810 | Lefty1     | 498299 |
| 3.7127042 | down | NM_053614    | Lenep      | 113917 |
| 2.6039119 | down | XM_001066214 | Leng1      | 292535 |
| 3.3251677 | down | NM_012976    | Lgals5     | 25475  |
| 6.212136  | down | NM_001009706 | Lhpp       | 361663 |
| 3.7060726 | down | XM_001079382 | Lhx6       | 311901 |
| 9.159647  | down | NM_022196    | Lif        | 60584  |
| 7.231573  | down | NM_031727    | Limk1      | 65172  |
| 5.181989  | down | NM_024135    | Limk2      | 29524  |
| 2.0071    | down | XM_001053331 | Lims1      | 499443 |
| 10.384    | down | XM_001067034 | Lin28c     | 298542 |
| 5.636558  | down | XM_001068291 | Lingo1     | 315691 |
| 3.8210344 | down | XM_001079892 | Lipl3      | 309528 |
| 4.116048  | down | NM_145790    | Lipogenin  | 252964 |
| 5.7906632 | down | XM_001072368 | Lmln       | 363795 |
| 9.145774  | down | XM_001076027 | Lmnb2      | 299625 |
| 4.614557  | down | XM_001062822 | Lmod1      | 304816 |
| 3.3715806 | down | XM_001072144 | Lmx1a      | 289201 |
| 2.7081745 | down | NM_147136    | LOC257642  | 257642 |
| 5.095924  | down | NM_147212    | LOC259244  | 259244 |
| 11.020922 | down | NM_147214    | LOC259246  | 259246 |
| 76.629684 | down | XM_001064280 | LOC287921  | 287921 |

|           |      |              |           |        |
|-----------|------|--------------|-----------|--------|
| 5.397456  | down | NM_001047845 | LOC287992 | 287992 |
| 20.908447 | down | XM_001066324 | LOC288419 | 288419 |
| 47.646233 | down | XM_222037    | LOC288574 | 288574 |
| 54.671227 | down | XM_223807    | LOC289918 | 289918 |
| 34.431328 | down | XM_223906    | LOC289977 | 289977 |
| 8.787532  | down | XM_001074926 | LOC290415 | 290415 |
| 24.772429 | down | XM_001061314 | LOC290508 | 290508 |
| 4.3548784 | down | XM_001065661 | LOC290595 | 290595 |
| 7.355594  | down | XM_001062951 | LOC291276 | 291276 |
| 12.227631 | down | XM_225800    | LOC291480 | 291480 |
| 36.609283 | down | XM_225786    | LOC291516 | 291516 |
| 2.0917075 | down | XM_001054025 | LOC291758 | 291758 |
| 5.0026727 | down | NM_001013889 | LOC291863 | 291863 |
| 2.9976764 | down | NM_001013893 | LOC292516 | 292516 |
| 31.728966 | down | XM_001071880 | LOC293697 | 293697 |
| 2.8218002 | down | XM_001061024 | LOC294446 | 294446 |
| 54.617657 | down | XM_228268    | LOC294497 | 294497 |
| 26.785362 | down | XM_001068962 | LOC295200 | 295200 |
| 12.984414 | down | XM_001080231 | LOC295528 | 295528 |
| 12.19084  | down | XM_001081785 | LOC295810 | 295810 |
| 5.77375   | down | NM_001047859 | LOC296300 | 296300 |
| 38.618946 | down | XM_216072    | LOC296778 | 296778 |
| 12.099913 | down | XM_001059270 | LOC298016 | 298016 |
| 6.2940135 | down | NM_203512    | LOC298109 | 298109 |
| 10.413017 | down | NM_001024248 | LOC298111 | 298111 |
| 5.46117   | down | NM_001003409 | LOC298116 | 298116 |
| 73.80514  | down | XM_001065571 | LOC298820 | 298820 |
| 7.5684013 | down | XM_001061760 | LOC299214 | 299214 |
| 8.067879  | down | XM_001071400 | LOC299915 | 299915 |
| 21.935684 | down | XM_001073983 | LOC300024 | 300024 |
| 6.5657816 | down | XM_001063650 | LOC300225 | 300225 |
| 3.922555  | down | NM_001013952 | LOC300308 | 300308 |
| 31.317795 | down | XM_236873    | LOC301193 | 301193 |
| 2.6822066 | down | XM_001070601 | LOC301289 | 301289 |
| 3.6147962 | down | XM_001060850 | LOC301379 | 301379 |
| 32.81259  | down | XM_001073715 | LOC301748 | 301748 |
| 36.180233 | down | XM_229238    | LOC301772 | 301772 |
| 34.306293 | down | XM_229292    | LOC301816 | 301816 |
| 54.848618 | down | XM_001061753 | LOC301839 | 301839 |
| 6.0871153 | down | XM_229375    | LOC301893 | 301893 |
| 45.049156 | down | XM_217508    | LOC301959 | 301959 |
| 53.387497 | down | XM_217510    | LOC301977 | 301977 |
| 33.119057 | down | XM_229524    | LOC302000 | 302000 |
| 13.900495 | down | XM_001073811 | LOC302022 | 302022 |

|           |      |              |           |        |
|-----------|------|--------------|-----------|--------|
| 25.313652 | down | XM_217530    | LOC302085 | 302085 |
| 16.385357 | down | XM_001081459 | LOC302157 | 302157 |
| 49.933308 | down | XM_001065392 | LOC302192 | 302192 |
| 48.783268 | down | XM_217542    | LOC302199 | 302199 |
| 62.27303  | down | XM_229842    | LOC302228 | 302228 |
| 6.235931  | down | XM_229908    | LOC302282 | 302282 |
| 2.4253204 | down | NM_001013962 | LOC302845 | 302845 |
| 3.3739038 | down | XM_001073573 | LOC303140 | 303140 |
| 9.709272  | down | NM_001017988 | LOC303566 | 303566 |
| 2.9469543 | down | NM_001006990 | LOC304000 | 304000 |
| 6.278987  | down | XM_001071596 | LOC304239 | 304239 |
| 35.478786 | down | XM_223806    | LOC305698 | 305698 |
| 29.162956 | down | XM_001081925 | LOC305771 | 305771 |
| 8.35964   | down | NM_001013993 | LOC305806 | 305806 |
| 2.0692008 | down | XM_001073815 | LOC306096 | 306096 |
| 27.695354 | down | XM_001065941 | LOC306312 | 306312 |
| 33.04537  | down | XM_224750    | LOC306365 | 306365 |
| 37.88786  | down | XM_001081637 | LOC307706 | 307706 |
| 79.05432  | down | XM_217963    | LOC308198 | 308198 |
| 6.001076  | down | XM_001073801 | LOC312502 | 312502 |
| 50.159195 | down | XM_236887    | LOC316192 | 316192 |
| 29.196102 | down | XM_001078812 | LOC316493 | 316493 |
| 19.782467 | down | XM_001081471 | LOC316856 | 316856 |
| 58.300297 | down | XM_001064910 | LOC316873 | 316873 |
| 79.447174 | down | XM_229488    | LOC316919 | 316919 |
| 34.990723 | down | XM_229505    | LOC316931 | 316931 |
| 18.9407   | down | XM_229508    | LOC316933 | 316933 |
| 23.485727 | down | XM_229514    | LOC316935 | 316935 |
| 18.10336  | down | XM_229775    | LOC317070 | 317070 |
| 22.147703 | down | XM_001078949 | LOC317085 | 317085 |
| 28.50243  | down | NM_001047892 | LOC317165 | 317165 |
| 3.2362971 | down | XM_001055457 | LOC317546 | 317546 |
| 2.724282  | down | XM_001059691 | LOC317618 | 317618 |
| 16.187134 | down | NM_001003706 | LOC360228 | 360228 |
| 2.5272849 | down | XM_340956    | LOC360684 | 360684 |
| 50.89191  | down | XM_001057404 | LOC360998 | 360998 |
| 4.6817565 | down | XM_341405    | LOC361117 | 361117 |
| 17.488012 | down | XM_001068100 | LOC362347 | 362347 |
| 2.9171846 | down | XM_001065062 | LOC362710 | 362710 |
| 13.89541  | down | NM_001008878 | LOC362921 | 362921 |
| 38.4886   | down | XM_001061883 | LOC363181 | 363181 |
| 84.31829  | down | XM_347120    | LOC363301 | 363301 |
| 41.064148 | down | XM_001062328 | LOC363306 | 363306 |
| 62.630455 | down | XM_343653    | LOC363313 | 363313 |

|           |      |              |           |        |
|-----------|------|--------------|-----------|--------|
| 34.666893 | down | XM_001075455 | LOC363320 | 363320 |
| 60.855377 | down | XM_343663    | LOC363324 | 363324 |
| 46.58918  | down | XM_001060748 | LOC363336 | 363336 |
| 99.97071  | down | NM_001014221 | LOC363337 | 363337 |
| 70.77789  | down | XM_001081023 | LOC363343 | 363343 |
| 49.445343 | down | XM_001081888 | LOC363351 | 363351 |
| 74.4476   | down | XM_001076189 | LOC363354 | 363354 |
| 52.330788 | down | XM_001077951 | LOC363363 | 363363 |
| 36.29742  | down | XM_343700    | LOC363366 | 363366 |
| 36.700314 | down | XM_001074547 | LOC363380 | 363380 |
| 68.19827  | down | XM_343727    | LOC363397 | 363397 |
| 49.782394 | down | XM_001072586 | LOC363405 | 363405 |
| 15.956937 | down | XM_001081758 | LOC363408 | 363408 |
| 67.35839  | down | XM_343747    | LOC363424 | 363424 |
| 65.56989  | down | XM_343755    | LOC363433 | 363433 |
| 41.290493 | down | XM_343756    | LOC363434 | 363434 |
| 5.7461357 | down | XM_001056684 | LOC363458 | 363458 |
| 9.318912  | down | XM_001061625 | LOC363645 | 363645 |
| 14.598273 | down | XM_344092    | LOC363894 | 363894 |
| 46.312874 | down | XM_344247    | LOC364164 | 364164 |
| 51.480583 | down | XM_344294    | LOC364250 | 364250 |
| 38.489822 | down | XM_344313    | LOC364281 | 364281 |
| 3.43735   | down | XM_001053364 | LOC364560 | 364560 |
| 5.995216  | down | XM_001056850 | LOC364653 | 364653 |
| 66.71507  | down | XM_001067171 | LOC364707 | 364707 |
| 5.020904  | down | XM_001059009 | LOC365076 | 365076 |
| 46.87522  | down | XM_001053352 | LOC365499 | 365499 |
| 48.82164  | down | XM_001055159 | LOC365501 | 365501 |
| 5.903428  | down | XM_345058    | LOC365502 | 365502 |
| 42.6632   | down | XM_345061    | LOC365506 | 365506 |
| 5.078224  | down | XM_001077769 | LOC365559 | 365559 |
| 7.3207607 | down | NM_001014251 | LOC365778 | 365778 |
| 6.752     | down | XM_345306    | LOC365969 | 365969 |
| 3.5607095 | down | XM_001053873 | LOC366369 | 366369 |
| 3.7635088 | down | NM_001014264 | LOC366772 | 366772 |
| 71.83227  | down | XM_001070902 | LOC366780 | 366780 |
| 3.24095   | down | XM_001076470 | LOC367036 | 367036 |
| 3.1853135 | down | XM_345916    | LOC367050 | 367050 |
| 13.562914 | down | XM_001065443 | LOC367269 | 367269 |
| 5.1754184 | down | XM_001080734 | LOC367277 | 367277 |
| 63.389614 | down | XM_001078369 | LOC367377 | 367377 |
| 56.86602  | down | XM_001067423 | LOC367381 | 367381 |
| 5.873363  | down | XM_001068482 | LOC367390 | 367390 |
| 49.55452  | down | XM_346138    | LOC367436 | 367436 |

|           |      |              |           |        |
|-----------|------|--------------|-----------|--------|
| 56.937374 | down | XM_001059570 | LOC367485 | 367485 |
| 54.40452  | down | XM_001075365 | LOC367493 | 367493 |
| 73.13089  | down | XM_001062392 | LOC367516 | 367516 |
| 55.84053  | down | XM_346193    | LOC367523 | 367523 |
| 49.670025 | down | XM_001063146 | LOC367539 | 367539 |
| 18.67063  | down | XM_001073778 | LOC367597 | 367597 |
| 49.90691  | down | XM_001081934 | LOC367617 | 367617 |
| 19.400614 | down | XM_001071580 | LOC367619 | 367619 |
| 49.2415   | down | XM_346234    | LOC367632 | 367632 |
| 41.131454 | down | XM_346241    | LOC367653 | 367653 |
| 10.383574 | down | XM_001065575 | LOC367746 | 367746 |
| 2.44992   | down | XM_001070043 | LOC367960 | 367960 |
| 8.534635  | down | XM_001077158 | LOC367994 | 367994 |
| 98.06581  | down | NM_001009977 | LOC494539 | 494539 |
| 4.5898643 | down | NM_001017476 | LOC497940 | 497940 |
| 4.337418  | down | XM_001071636 | LOC498132 | 498132 |
| 2.4001164 | down | NM_001017485 | LOC498145 | 498145 |
| 2.628841  | down | NM_001047923 | LOC498152 | 498152 |
| 25.87609  | down | XM_001068258 | LOC498316 | 498316 |
| 65.6798   | down | XM_573546    | LOC498320 | 498320 |
| 3.7333462 | down | NM_001017500 | LOC498368 | 498368 |
| 40.14987  | down | XM_001061548 | LOC498372 | 498372 |
| 48.425095 | down | XM_573609    | LOC498374 | 498374 |
| 25.058294 | down | XM_573699    | LOC498444 | 498444 |
| 77.51499  | down | XM_001079520 | LOC498446 | 498446 |
| 54.967068 | down | XM_001076556 | LOC498463 | 498463 |
| 23.163778 | down | XM_001069250 | LOC498465 | 498465 |
| 38.140503 | down | XM_573724    | LOC498467 | 498467 |
| 32.35807  | down | XM_573725    | LOC498468 | 498468 |
| 31.567074 | down | XM_001062043 | LOC498470 | 498470 |
| 31.097637 | down | XM_573728    | LOC498471 | 498471 |
| 26.388048 | down | XM_573730    | LOC498473 | 498473 |
| 34.225624 | down | XM_573731    | LOC498474 | 498474 |
| 30.754328 | down | XM_573735    | LOC498477 | 498477 |
| 25.507704 | down | XM_573738    | LOC498480 | 498480 |
| 2.0517464 | down | NM_001047932 | LOC498525 | 498525 |
| 22.590673 | down | XM_573840    | LOC498565 | 498565 |
| 28.812107 | down | XM_573955    | LOC498672 | 498672 |
| 12.057077 | down | NM_001047934 | LOC498705 | 498705 |
| 56.168907 | down | XM_001063340 | LOC498781 | 498781 |
| 2.084799  | down | XM_001061235 | LOC498872 | 498872 |
| 13.701689 | down | XM_574261    | LOC498974 | 498974 |
| 3.3679075 | down | XM_001077990 | LOC499110 | 499110 |
| 58.844715 | down | NM_001047938 | LOC499219 | 499219 |

|           |      |              |           |        |
|-----------|------|--------------|-----------|--------|
| 3.0223188 | down | NM_001024287 | LOC499240 | 499240 |
| 2.711534  | down | NM_001024293 | LOC499331 | 499331 |
| 55.388878 | down | XM_579956    | LOC499384 | 499384 |
| 5.49474   | down | XM_574708    | LOC499392 | 499392 |
| 8.962447  | down | NM_001024296 | LOC499418 | 499418 |
| 5.1969323 | down | XM_001059085 | LOC499618 | 499618 |
| 2.3368175 | down | XM_001068073 | LOC499729 | 499729 |
| 4.749247  | down | XM_575069    | LOC499735 | 499735 |
| 2.0358603 | down | NM_001024309 | LOC499749 | 499749 |
| 2.725816  | down | XM_575114    | LOC499781 | 499781 |
| 2.0756445 | down | NM_001024311 | LOC499806 | 499806 |
| 20.298588 | down | NM_001047952 | LOC499823 | 499823 |
| 4.1074724 | down | XM_001075695 | LOC499827 | 499827 |
| 4.2825265 | down | NM_001024312 | LOC499886 | 499886 |
| 3.8673208 | down | NM_001047954 | LOC500028 | 500028 |
| 3.3532336 | down | NM_001047955 | LOC500035 | 500035 |
| 4.357604  | down | NM_001024325 | LOC500077 | 500077 |
| 3.3022542 | down | NM_001035253 | LOC500148 | 500148 |
| 2.200718  | down | XM_575564    | LOC500213 | 500213 |
| 24.264557 | down | NM_001047956 | LOC500270 | 500270 |
| 5.95522   | down | XM_001058924 | LOC500420 | 500420 |
| 26.75008  | down | XM_001077472 | LOC500584 | 500584 |
| 2.7623198 | down | XM_001063476 | LOC500682 | 500682 |
| 11.884667 | down | XM_576202    | LOC500815 | 500815 |
| 17.733654 | down | NM_001029926 | LOC500893 | 500893 |
| 2.0852857 | down | NM_001047965 | LOC501038 | 501038 |
| 39.370865 | down | XM_576504    | LOC501089 | 501089 |
| 49.70811  | down | XM_576506    | LOC501091 | 501091 |
| 41.50523  | down | XM_576507    | LOC501092 | 501092 |
| 32.461784 | down | XM_580172    | LOC501210 | 501210 |
| 37.256493 | down | XM_580174    | LOC501212 | 501212 |
| 62.282063 | down | XM_001067568 | LOC501220 | 501220 |
| 57.768894 | down | XM_576645    | LOC501222 | 501222 |
| 50.40664  | down | XM_001071000 | LOC501223 | 501223 |
| 45.530228 | down | XM_576649    | LOC501226 | 501226 |
| 33.531048 | down | XM_001076269 | LOC501230 | 501230 |
| 2.7204716 | down | NM_001047967 | LOC501233 | 501233 |
| 74.534515 | down | XM_576655    | LOC501234 | 501234 |
| 72.67911  | down | XM_576656    | LOC501235 | 501235 |
| 36.328243 | down | XM_580178    | LOC501237 | 501237 |
| 52.67234  | down | XM_576669    | LOC501250 | 501250 |
| 61.580544 | down | XM_576670    | LOC501251 | 501251 |
| 29.867342 | down | XM_576671    | LOC501252 | 501252 |
| 44.989357 | down | XM_576674    | LOC501255 | 501255 |

|           |      |              |           |        |
|-----------|------|--------------|-----------|--------|
| 47.22134  | down | XM_576675    | LOC501256 | 501256 |
| 5.4703984 | down | XM_001074384 | LOC501263 | 501263 |
| 11.20864  | down | XM_001081788 | LOC501270 | 501270 |
| 56.725456 | down | XM_576687    | LOC501271 | 501271 |
| 3.7174315 | down | XM_001081100 | LOC501272 | 501272 |
| 77.09637  | down | XM_576689    | LOC501274 | 501274 |
| 3.6362576 | down | XM_576703    | LOC501289 | 501289 |
| 4.341948  | down | XM_580185    | LOC501291 | 501291 |
| 79.066284 | down | XM_576705    | LOC501292 | 501292 |
| 82.09782  | down | XM_001081221 | LOC501296 | 501296 |
| 80.206535 | down | XM_576712    | LOC501299 | 501299 |
| 65.295586 | down | XM_576715    | LOC501302 | 501302 |
| 60.429276 | down | XM_576718    | LOC501305 | 501305 |
| 81.5156   | down | XM_576719    | LOC501306 | 501306 |
| 65.72291  | down | XM_576720    | LOC501307 | 501307 |
| 54.60504  | down | XM_576721    | LOC501308 | 501308 |
| 41.882526 | down | XM_576725    | LOC501312 | 501312 |
| 36.761806 | down | XM_576728    | LOC501315 | 501315 |
| 42.224422 | down | XM_576729    | LOC501317 | 501317 |
| 22.039133 | down | XM_001068431 | LOC501321 | 501321 |
| 41.509964 | down | XM_001077981 | LOC501325 | 501325 |
| 60.01675  | down | XM_001059339 | LOC501329 | 501329 |
| 98.19113  | down | XM_001068278 | LOC501333 | 501333 |
| 78.07093  | down | XM_576745    | LOC501334 | 501334 |
| 7.913709  | down | XM_576746    | LOC501335 | 501335 |
| 80.08177  | down | XM_576750    | LOC501339 | 501339 |
| 42.656647 | down | XM_001081326 | LOC501342 | 501342 |
| 65.337616 | down | XM_576757    | LOC501346 | 501346 |
| 20.543316 | down | XM_001073636 | LOC501349 | 501349 |
| 52.878555 | down | XM_001077232 | LOC501350 | 501350 |
| 3.1297772 | down | XM_576764    | LOC501353 | 501353 |
| 51.122845 | down | XM_576770    | LOC501358 | 501358 |
| 54.183525 | down | XM_001075605 | LOC501361 | 501361 |
| 67.64535  | down | XM_001074895 | LOC501362 | 501362 |
| 66.232155 | down | XM_576779    | LOC501366 | 501366 |
| 59.060158 | down | XM_576781    | LOC501368 | 501368 |
| 97.2149   | down | XM_576782    | LOC501369 | 501369 |
| 49.329563 | down | XM_001081874 | LOC501370 | 501370 |
| 42.3697   | down | XM_001080720 | LOC501372 | 501372 |
| 58.151516 | down | XM_001069914 | LOC501373 | 501373 |
| 33.168373 | down | XM_576788    | LOC501375 | 501375 |
| 36.56026  | down | XM_576790    | LOC501377 | 501377 |
| 42.9892   | down | XM_001081029 | LOC501383 | 501383 |
| 57.739212 | down | XM_576797    | LOC501384 | 501384 |



|           |      |              |           |        |
|-----------|------|--------------|-----------|--------|
| 54.617477 | down | XM_576799    | LOC501386 | 501386 |
| 16.845032 | down | XM_576801    | LOC501388 | 501388 |
| 32.153854 | down | XM_576802    | LOC501389 | 501389 |
| 10.539881 | down | XM_580189    | LOC501391 | 501391 |
| 35.98629  | down | XM_576808    | LOC501396 | 501396 |
| 46.932518 | down | XM_576812    | LOC501399 | 501399 |
| 60.54399  | down | XM_576813    | LOC501400 | 501400 |
| 26.788948 | down | XM_576828    | LOC501417 | 501417 |
| 33.46265  | down | XM_580192    | LOC501420 | 501420 |
| 76.24212  | down | XM_001058335 | LOC501421 | 501421 |
| 3.5861003 | down | XM_576832    | LOC501422 | 501422 |
| 36.505405 | down | XM_001078724 | LOC501427 | 501427 |
| 21.215935 | down | XM_001074315 | LOC501437 | 501437 |
| 10.190827 | down | XM_576866    | LOC501456 | 501456 |
| 68.500404 | down | XM_576877    | LOC501467 | 501467 |
| 58.274464 | down | XM_576879    | LOC501469 | 501469 |
| 64.53245  | down | XM_001066518 | LOC501470 | 501470 |
| 51.4297   | down | XM_576882    | LOC501474 | 501474 |
| 35.368927 | down | XM_001080724 | LOC501476 | 501476 |
| 64.278305 | down | XM_576885    | LOC501477 | 501477 |
| 75.38921  | down | XM_001081012 | LOC501479 | 501479 |
| 60.38268  | down | XM_001080503 | LOC501482 | 501482 |
| 63.510117 | down | XM_576890    | LOC501483 | 501483 |
| 64.9935   | down | XM_580199    | LOC501485 | 501485 |
| 65.15481  | down | XM_576894    | LOC501488 | 501488 |
| 36.432842 | down | XM_576897    | LOC501491 | 501491 |
| 2.1161444 | down | NM_001047112 | LOC501503 | 501503 |
| 24.711481 | down | XM_001066422 | LOC501791 | 501791 |
| 19.864445 | down | XM_001069885 | LOC501799 | 501799 |
| 44.026287 | down | XM_001070011 | LOC501800 | 501800 |
| 53.69245  | down | XM_001055287 | LOC501842 | 501842 |
| 35.807655 | down | XM_001081795 | LOC501937 | 501937 |
| 14.595794 | down | XM_577380    | LOC501953 | 501953 |
| 2.4812622 | down | XM_001063944 | LOC502111 | 502111 |
| 7.697377  | down | XM_001055993 | LOC502167 | 502167 |
| 80.29056  | down | XM_001071460 | LOC502276 | 502276 |
| 57.724865 | down | XM_001071332 | LOC502279 | 502279 |
| 9.736459  | down | XM_001077835 | LOC502382 | 502382 |
| 59.81986  | down | XM_577967    | LOC502486 | 502486 |
| 32.155865 | down | XM_001053637 | LOC502549 | 502549 |
| 6.3431997 | down | XM_001080659 | LOC502572 | 502572 |
| 3.0464823 | down | NM_001025064 | LOC502894 | 502894 |
| 2.588255  | down | XM_578409    | LOC502907 | 502907 |
| 14.766846 | down | XM_001055190 | LOC502933 | 502933 |

|           |      |              |           |        |
|-----------|------|--------------|-----------|--------|
| 28.558718 | down | XM_001064499 | LOC503152 | 503152 |
| 5.323973  | down | XM_001071281 | LOC503156 | 503156 |
| 3.3995025 | down | XM_578715    | LOC503192 | 503192 |
| 2.358313  | down | XM_001067730 | LOC503224 | 503224 |
| 43.427658 | down | XM_578861    | LOC503327 | 503327 |
| 4.0841746 | down | XM_578871    | LOC503337 | 503337 |
| 3.9662766 | down | XM_001071495 | LOC503366 | 503366 |
| 11.972129 | down | XM_001067328 | LOC503381 | 503381 |
| 3.6734514 | down | XM_578925    | LOC503388 | 503388 |
| 42.50232  | down | XM_001076870 | LOC503392 | 503392 |
| 3.7398708 | down | XM_001072828 | LOC503393 | 503393 |
| 8.044205  | down | XM_001070645 | LOC503407 | 503407 |
| 6.2922993 | down | XM_001053009 | LOC678700 | 678700 |
| 7.8380704 | down | XM_001052993 | LOC678702 | 678702 |
| 61.860386 | down | XM_001053092 | LOC678713 | 678713 |
| 23.545341 | down | XM_001053098 | LOC678714 | 678714 |
| 30.000948 | down | XM_001053175 | LOC678732 | 678732 |
| 48.3934   | down | XM_001053285 | LOC678755 | 678755 |
| 5.404641  | down | XM_001053091 | LOC678768 | 678768 |
| 20.515442 | down | XM_001053190 | LOC678790 | 678790 |
| 2.983803  | down | XM_001053228 | LOC678801 | 678801 |
| 2.788418  | down | XM_001053238 | LOC678805 | 678805 |
| 2.7414322 | down | XM_001053279 | LOC678812 | 678812 |
| 11.600071 | down | XM_001053286 | LOC678814 | 678814 |
| 10.652635 | down | XM_001053442 | LOC678841 | 678841 |
| 2.7459228 | down | XM_001053785 | LOC678893 | 678893 |
| 8.889208  | down | XM_001053690 | LOC678897 | 678897 |
| 3.6629314 | down | XM_001054058 | LOC678934 | 678934 |
| 10.51544  | down | XM_001053931 | LOC678948 | 678948 |
| 5.297027  | down | XM_001053935 | LOC678950 | 678950 |
| 72.25829  | down | XM_001053936 | LOC678951 | 678951 |
| 3.2999911 | down | XM_001054033 | LOC678966 | 678966 |
| 78.06979  | down | XM_001054045 | LOC678971 | 678971 |
| 88.14118  | down | XM_001054164 | LOC678999 | 678999 |
| 2.8394742 | down | XM_001054295 | LOC679024 | 679024 |
| 9.58112   | down | XM_001054475 | LOC679052 | 679052 |
| 66.312546 | down | XM_001054541 | LOC679066 | 679066 |
| 4.105487  | down | XM_001054590 | LOC679075 | 679075 |
| 2.0304298 | down | XM_001054613 | LOC679081 | 679081 |
| 6.9046307 | down | XM_001054621 | LOC679083 | 679083 |
| 2.1106317 | down | XM_001054639 | LOC679087 | 679087 |
| 14.997544 | down | XM_001054758 | LOC679116 | 679116 |
| 15.219467 | down | XM_001054775 | LOC679119 | 679119 |
| 3.3534632 | down | XM_001054006 | LOC679149 | 679149 |

|            |      |              |           |        |
|------------|------|--------------|-----------|--------|
| 44.176758  | down | XM_001054917 | LOC679152 | 679152 |
| 3.0962157  | down | XM_001054441 | LOC679159 | 679159 |
| 43.33089   | down | XM_001055060 | LOC679174 | 679174 |
| 3.1340888  | down | XM_001055076 | LOC679177 | 679177 |
| 6.2864933  | down | XM_001055169 | LOC679196 | 679196 |
| 21.06258   | down | XM_001055262 | LOC679220 | 679220 |
| 22.612465  | down | XM_001055295 | LOC679225 | 679225 |
| 2.9264631  | down | XM_001055396 | LOC679240 | 679240 |
| 2.6322908  | down | XM_001055528 | LOC679267 | 679267 |
| 29.498405  | down | XM_001055566 | LOC679276 | 679276 |
| 15.894373  | down | XM_001055619 | LOC679284 | 679284 |
| 6.631154   | down | XM_001055683 | LOC679296 | 679296 |
| 20.971912  | down | XM_001055684 | LOC679297 | 679297 |
| 2.1222107  | down | XM_001055779 | LOC679315 | 679315 |
| 32.570717  | down | XM_001055874 | LOC679336 | 679336 |
| 17.796152  | down | XM_001055925 | LOC679345 | 679345 |
| 6.2329392  | down | XM_001055994 | LOC679355 | 679355 |
| 30.91143   | down | XM_001056071 | LOC679373 | 679373 |
| 3.6487734  | down | XM_001056286 | LOC679424 | 679424 |
| 5.239325   | down | XM_001056296 | LOC679426 | 679426 |
| 14.817795  | down | XM_001056304 | LOC679430 | 679430 |
| 4.9114738  | down | XM_001056318 | LOC679434 | 679434 |
| 120.320885 | down | XM_001056500 | LOC679467 | 679467 |
| 5.2735105  | down | XM_001056505 | LOC679468 | 679468 |
| 51.609055  | down | XM_001056539 | LOC679474 | 679474 |
| 45.657265  | down | XM_001056542 | LOC679475 | 679475 |
| 5.006436   | down | XM_001056556 | LOC679478 | 679478 |
| 2.5450473  | down | XM_001056611 | LOC679495 | 679495 |
| 9.885952   | down | XM_001053309 | LOC679516 | 679516 |
| 5.397563   | down | XM_001053356 | LOC679525 | 679525 |
| 14.289302  | down | XM_001053363 | LOC679527 | 679527 |
| 3.4855673  | down | XM_001053376 | LOC679531 | 679531 |
| 7.7570686  | down | XM_001053382 | LOC679533 | 679533 |
| 2.9312336  | down | XM_001053716 | LOC679539 | 679539 |
| 31.282175  | down | XM_001053426 | LOC679546 | 679546 |
| 2.427537   | down | XM_001053432 | LOC679548 | 679548 |
| 18.252293  | down | XM_001053447 | LOC679551 | 679551 |
| 27.788486  | down | XM_001053493 | LOC679559 | 679559 |
| 37.914944  | down | XM_001053499 | LOC679562 | 679562 |
| 2.6707914  | down | XM_001053570 | LOC679578 | 679578 |
| 21.616371  | down | XM_001053578 | LOC679580 | 679580 |
| 34.309525  | down | XM_001053601 | LOC679587 | 679587 |
| 30.967909  | down | XM_001053602 | LOC679588 | 679588 |
| 4.406338   | down | XM_001053687 | LOC679601 | 679601 |

|           |      |              |           |        |
|-----------|------|--------------|-----------|--------|
| 34.427746 | down | XM_001053704 | LOC679606 | 679606 |
| 73.20467  | down | XM_001053708 | LOC679608 | 679608 |
| 67.58584  | down | XM_001053745 | LOC679613 | 679613 |
| 43.152756 | down | XM_001053751 | LOC679615 | 679615 |
| 20.989014 | down | XM_001053772 | LOC679624 | 679624 |
| 11.094345 | down | XM_001053810 | LOC679635 | 679635 |
| 10.490124 | down | XM_001053811 | LOC679636 | 679636 |
| 55.301037 | down | XM_001053817 | LOC679639 | 679639 |
| 4.3769755 | down | XM_001053854 | LOC679646 | 679646 |
| 8.043753  | down | XM_001053871 | LOC679653 | 679653 |
| 52.794327 | down | XM_001053909 | LOC679662 | 679662 |
| 4.9591403 | down | XM_001053910 | LOC679663 | 679663 |
| 22.901371 | down | XM_001053929 | LOC679665 | 679665 |
| 2.9195824 | down | XM_001054023 | LOC679685 | 679685 |
| 11.121289 | down | XM_001054071 | LOC679694 | 679694 |
| 9.833316  | down | XM_001054075 | LOC679695 | 679695 |
| 56.43643  | down | XM_001054076 | LOC679696 | 679696 |
| 46.92979  | down | XM_001054104 | LOC679703 | 679703 |
| 3.032061  | down | XM_001054134 | LOC679708 | 679708 |
| 84.28407  | down | XM_001054169 | LOC679718 | 679718 |
| 41.95026  | down | XM_001054170 | LOC679719 | 679719 |
| 3.5372097 | down | XM_001054194 | LOC679721 | 679721 |
| 22.016186 | down | XM_001054200 | LOC679723 | 679723 |
| 48.07786  | down | XM_001054202 | LOC679724 | 679724 |
| 36.205616 | down | XM_001054210 | LOC679726 | 679726 |
| 46.20429  | down | XM_001054232 | LOC679730 | 679730 |
| 35.7607   | down | XM_001054293 | LOC679742 | 679742 |
| 56.03829  | down | XM_001054303 | LOC679745 | 679745 |
| 27.959135 | down | XM_001054329 | LOC679752 | 679752 |
| 4.579852  | down | XM_001054337 | LOC679756 | 679756 |
| 16.819729 | down | XM_001054394 | LOC679766 | 679766 |
| 4.2924685 | down | XM_001054418 | LOC679772 | 679772 |
| 81.076256 | down | XM_001054477 | LOC679792 | 679792 |
| 15.432025 | down | XM_001054507 | LOC679797 | 679797 |
| 42.623455 | down | XM_001054511 | LOC679798 | 679798 |
| 17.381884 | down | XM_001054523 | LOC679800 | 679800 |
| 89.93563  | down | XM_001054539 | LOC679807 | 679807 |
| 4.566302  | down | XM_001054562 | LOC679814 | 679814 |
| 13.339006 | down | XM_001054575 | LOC679817 | 679817 |
| 19.494324 | down | XM_001053659 | LOC679822 | 679822 |
| 10.109344 | down | XM_001054610 | LOC679825 | 679825 |
| 3.8788562 | down | XM_001054617 | LOC679826 | 679826 |
| 43.775078 | down | XM_001054620 | LOC679828 | 679828 |
| 15.017341 | down | XM_001054637 | LOC679832 | 679832 |

|           |      |              |           |        |
|-----------|------|--------------|-----------|--------|
| 9.65233   | down | XM_001054181 | LOC679835 | 679835 |
| 10.804071 | down | XM_001054681 | LOC679839 | 679839 |
| 2.0526023 | down | XM_001054690 | LOC679843 | 679843 |
| 17.790236 | down | XM_001054761 | LOC679858 | 679858 |
| 48.78583  | down | XM_001054768 | LOC679861 | 679861 |
| 37.867855 | down | XM_001054782 | LOC679867 | 679867 |
| 40.78223  | down | XM_001054810 | LOC679878 | 679878 |
| 30.134045 | down | XM_001054812 | LOC679879 | 679879 |
| 9.388521  | down | XM_001054867 | LOC679891 | 679891 |
| 9.51941   | down | XM_001054878 | LOC679896 | 679896 |
| 15.154018 | down | XM_001054886 | LOC679901 | 679901 |
| 4.8491354 | down | XM_001054892 | LOC679902 | 679902 |
| 39.27926  | down | XM_001054925 | LOC679909 | 679909 |
| 51.67115  | down | XM_001054988 | LOC679927 | 679927 |
| 7.9497056 | down | XM_001054996 | LOC679931 | 679931 |
| 6.034984  | down | XM_001055003 | LOC679933 | 679933 |
| 41.94165  | down | XM_001055005 | LOC679935 | 679935 |
| 9.901363  | down | XM_001055048 | LOC679948 | 679948 |
| 10.111776 | down | XM_001055069 | LOC679954 | 679954 |
| 31.855618 | down | XM_001054115 | LOC679958 | 679958 |
| 11.546809 | down | XM_001055105 | LOC679964 | 679964 |
| 2.1677015 | down | XM_001055107 | LOC679966 | 679966 |
| 21.769081 | down | XM_001055170 | LOC679982 | 679982 |
| 2.0443957 | down | XM_001055174 | LOC679983 | 679983 |
| 7.050724  | down | XM_001055218 | LOC679992 | 679992 |
| 11.400962 | down | XM_001055292 | LOC680009 | 680009 |
| 66.074165 | down | XM_001055300 | LOC680010 | 680010 |
| 20.767387 | down | XM_001055308 | LOC680011 | 680011 |
| 50.282192 | down | XM_001055404 | LOC680029 | 680029 |
| 2.129526  | down | XM_001055432 | LOC680037 | 680037 |
| 23.5185   | down | XM_001055521 | LOC680062 | 680062 |
| 5.5608783 | down | XM_001055524 | LOC680063 | 680063 |
| 6.136398  | down | XM_001055568 | LOC680072 | 680072 |
| 2.2538528 | down | XM_001055570 | LOC680073 | 680073 |
| 2.5413573 | down | XM_001055571 | LOC680074 | 680074 |
| 80.23305  | down | XM_001055573 | LOC680075 | 680075 |
| 5.0519495 | down | XM_001055577 | LOC680077 | 680077 |
| 6.6390557 | down | XM_001055746 | LOC680105 | 680105 |
| 59.38656  | down | XM_001055748 | LOC680106 | 680106 |
| 48.566307 | down | XM_001055754 | LOC680108 | 680108 |
| 40.202988 | down | XM_001055766 | LOC680112 | 680112 |
| 16.706978 | down | XM_001055804 | LOC680120 | 680120 |
| 17.957325 | down | XM_001055813 | LOC680122 | 680122 |
| 76.2912   | down | XM_001055864 | LOC680136 | 680136 |

|           |      |              |           |        |
|-----------|------|--------------|-----------|--------|
| 31.817432 | down | XM_001055875 | LOC680137 | 680137 |
| 62.085087 | down | XM_001055919 | LOC680154 | 680154 |
| 2.1357415 | down | XM_001055658 | LOC680160 | 680160 |
| 21.950697 | down | XM_001055979 | LOC680164 | 680164 |
| 3.7165704 | down | XM_001055982 | LOC680165 | 680165 |
| 54.6537   | down | XM_001055983 | LOC680166 | 680166 |
| 13.056774 | down | XM_001055984 | LOC680167 | 680167 |
| 3.4070501 | down | XM_001056034 | LOC680182 | 680182 |
| 82.19893  | down | XM_001056044 | LOC680185 | 680185 |
| 10.662138 | down | XM_001056059 | LOC680187 | 680187 |
| 27.711058 | down | XM_001056064 | LOC680189 | 680189 |
| 5.53208   | down | XM_001056076 | LOC680191 | 680191 |
| 34.885777 | down | XM_001056098 | LOC680198 | 680198 |
| 5.491178  | down | XM_001056114 | LOC680205 | 680205 |
| 3.6606913 | down | XM_001056138 | LOC680214 | 680214 |
| 5.2112    | down | NM_001047974 | LOC680227 | 680227 |
| 58.505043 | down | XM_001056223 | LOC680228 | 680228 |
| 58.89355  | down | XM_001056232 | LOC680230 | 680230 |
| 16.246264 | down | XM_001056253 | LOC680235 | 680235 |
| 24.489313 | down | XM_001056256 | LOC680236 | 680236 |
| 85.020676 | down | XM_001056284 | LOC680239 | 680239 |
| 13.598194 | down | XM_001056294 | LOC680242 | 680242 |
| 25.640368 | down | XM_001056352 | LOC680255 | 680255 |
| 2.3559642 | down | XM_001056376 | LOC680262 | 680262 |
| 17.038364 | down | XM_001056408 | LOC680272 | 680272 |
| 28.372545 | down | XM_001056413 | LOC680273 | 680273 |
| 16.525328 | down | XM_001056418 | LOC680277 | 680277 |
| 42.81023  | down | XM_001056442 | LOC680281 | 680281 |
| 7.020464  | down | XM_001056463 | LOC680286 | 680286 |
| 4.099851  | down | XM_001056561 | LOC680307 | 680307 |
| 13.607326 | down | XM_001056586 | LOC680310 | 680310 |
| 43.605404 | down | XM_001056624 | LOC680318 | 680318 |
| 65.68631  | down | XM_001056660 | LOC680323 | 680323 |
| 35.43944  | down | XM_001056676 | LOC680326 | 680326 |
| 3.3507862 | down | XM_001056711 | LOC680330 | 680330 |
| 15.961326 | down | XM_001056719 | LOC680334 | 680334 |
| 17.303646 | down | XM_001056741 | LOC680340 | 680340 |
| 24.473867 | down | XM_001056745 | LOC680341 | 680341 |
| 90.586586 | down | XM_001056791 | LOC680347 | 680347 |
| 38.578426 | down | XM_001056978 | LOC680387 | 680387 |
| 2.5158753 | down | XM_001057030 | LOC680396 | 680396 |
| 13.160196 | down | XM_001057041 | LOC680400 | 680400 |
| 28.448305 | down | XM_001057042 | LOC680401 | 680401 |
| 2.1557858 | down | XM_001057119 | LOC680426 | 680426 |

|           |      |              |           |        |
|-----------|------|--------------|-----------|--------|
| 85.71498  | down | XM_001057146 | LOC680429 | 680429 |
| 52.012936 | down | XM_001057154 | LOC680431 | 680431 |
| 32.453876 | down | XM_001057208 | LOC680443 | 680443 |
| 63.904415 | down | XM_001053549 | LOC680453 | 680453 |
| 11.179648 | down | XM_001057278 | LOC680459 | 680459 |
| 85.79768  | down | XM_001057350 | LOC680475 | 680475 |
| 26.662613 | down | XM_001057490 | LOC680507 | 680507 |
| 2.4016733 | down | XM_001057500 | LOC680511 | 680511 |
| 23.46436  | down | XM_001057558 | LOC680525 | 680525 |
| 21.555656 | down | XM_001057599 | LOC680530 | 680530 |
| 31.0204   | down | XM_001057668 | LOC680547 | 680547 |
| 24.406586 | down | XM_001057697 | LOC680552 | 680552 |
| 35.060623 | down | XM_001057734 | LOC680563 | 680563 |
| 13.065753 | down | XM_001057889 | LOC680586 | 680586 |
| 24.200914 | down | XM_001057937 | LOC680596 | 680596 |
| 33.36841  | down | XM_001057948 | LOC680601 | 680601 |
| 52.188286 | down | XM_001057966 | LOC680608 | 680608 |
| 6.2284374 | down | XM_001058078 | LOC680631 | 680631 |
| 24.021774 | down | XM_001058083 | LOC680633 | 680633 |
| 72.990326 | down | XM_001058086 | LOC680636 | 680636 |
| 21.950829 | down | XM_001058089 | LOC680637 | 680637 |
| 30.160082 | down | XM_001058120 | LOC680643 | 680643 |
| 5.025041  | down | XM_001058134 | LOC680645 | 680645 |
| 15.789375 | down | XM_001058172 | LOC680650 | 680650 |
| 2.141346  | down | XM_001058181 | LOC680652 | 680652 |
| 27.686806 | down | XM_001058184 | LOC680653 | 680653 |
| 45.70478  | down | XM_001058208 | LOC680658 | 680658 |
| 7.3248897 | down | XM_001058364 | LOC680684 | 680684 |
| 2.1008434 | down | XM_001058388 | LOC680688 | 680688 |
| 5.0321097 | down | XM_001058400 | LOC680691 | 680691 |
| 3.5442913 | down | XM_001056825 | LOC680692 | 680692 |
| 4.691506  | down | XM_001058504 | LOC680704 | 680704 |
| 20.803848 | down | XM_001058521 | LOC680706 | 680706 |
| 11.096777 | down | XM_001056892 | LOC680711 | 680711 |
| 37.931664 | down | XM_001058554 | LOC680716 | 680716 |
| 39.20315  | down | XM_001058607 | LOC680730 | 680730 |
| 10.641303 | down | XM_001058618 | LOC680734 | 680734 |
| 2.1189418 | down | XM_001058677 | LOC680745 | 680745 |
| 57.652103 | down | XM_001058696 | LOC680748 | 680748 |
| 55.40358  | down | XM_001058748 | LOC680758 | 680758 |
| 100.96294 | down | XM_001058749 | LOC680759 | 680759 |
| 12.612502 | down | XM_001058769 | LOC680764 | 680764 |
| 3.7467499 | down | XM_001058777 | LOC680767 | 680767 |
| 28.622343 | down | XM_001058789 | LOC680771 | 680771 |

|           |      |              |           |        |
|-----------|------|--------------|-----------|--------|
| 55.317196 | down | XM_001058811 | LOC680777 | 680777 |
| 7.759974  | down | XM_001058892 | LOC680789 | 680789 |
| 6.274562  | down | XM_001058955 | LOC680802 | 680802 |
| 2.9995723 | down | XM_001058962 | LOC680804 | 680804 |
| 3.754154  | down | XM_001058971 | LOC680807 | 680807 |
| 19.645037 | down | XM_001058983 | LOC680810 | 680810 |
| 31.258053 | down | XM_001058989 | LOC680812 | 680812 |
| 67.35011  | down | XM_001059100 | LOC680831 | 680831 |
| 3.225905  | down | XM_001059174 | LOC680848 | 680848 |
| 38.832687 | down | XM_001059196 | LOC680854 | 680854 |
| 7.378768  | down | XM_001059256 | LOC680870 | 680870 |
| 12.598732 | down | XM_001059260 | LOC680871 | 680871 |
| 4.828091  | down | XM_001059262 | LOC680872 | 680872 |
| 79.45127  | down | XM_001059281 | LOC680879 | 680879 |
| 19.63454  | down | XM_001059315 | LOC680886 | 680886 |
| 16.298923 | down | XM_001059328 | LOC680888 | 680888 |
| 7.533215  | down | XM_001059362 | LOC680893 | 680893 |
| 44.255955 | down | XM_001059364 | LOC680894 | 680894 |
| 22.32287  | down | XM_001057692 | LOC680905 | 680905 |
| 7.6211133 | down | XM_001059444 | LOC680917 | 680917 |
| 37.303253 | down | XM_001059478 | LOC680922 | 680922 |
| 4.5125175 | down | XM_001059495 | LOC680927 | 680927 |
| 2.1797585 | down | XM_001059605 | LOC680949 | 680949 |
| 26.54648  | down | XM_001059609 | LOC680950 | 680950 |
| 8.166848  | down | XM_001059858 | LOC681000 | 681000 |
| 18.920715 | down | XM_001059901 | LOC681010 | 681010 |
| 28.47294  | down | XM_001059970 | LOC681020 | 681020 |
| 37.035954 | down | XM_001059994 | LOC681027 | 681027 |
| 4.697706  | down | XM_001060039 | LOC681038 | 681038 |
| 39.89092  | down | XM_001060083 | LOC681047 | 681047 |
| 36.017025 | down | XM_001060161 | LOC681067 | 681067 |
| 38.558697 | down | XM_001060180 | LOC681069 | 681069 |
| 33.718067 | down | XM_001060188 | LOC681071 | 681071 |
| 84.4843   | down | XM_001060331 | LOC681105 | 681105 |
| 3.2886999 | down | XM_001060359 | LOC681110 | 681110 |
| 41.2691   | down | XM_001060374 | LOC681115 | 681115 |
| 19.733124 | down | XM_001060390 | LOC681122 | 681122 |
| 43.973003 | down | XM_001060454 | LOC681139 | 681139 |
| 8.067282  | down | XM_001060483 | LOC681146 | 681146 |
| 8.245278  | down | XM_001060506 | LOC681150 | 681150 |
| 68.96246  | down | XM_001060513 | LOC681151 | 681151 |
| 11.217131 | down | XM_001060545 | LOC681154 | 681154 |
| 19.82939  | down | XM_001060556 | LOC681160 | 681160 |
| 4.9637794 | down | XM_001060565 | LOC681164 | 681164 |



|           |      |              |           |        |
|-----------|------|--------------|-----------|--------|
| 3.884197  | down | XM_001060571 | LOC681166 | 681166 |
| 43.78994  | down | XM_001060628 | LOC681176 | 681176 |
| 37.22562  | down | XM_001059937 | LOC681180 | 681180 |
| 39.10162  | down | XM_001060675 | LOC681187 | 681187 |
| 11.287025 | down | XM_001060713 | LOC681196 | 681196 |
| 47.320896 | down | XM_001060741 | LOC681204 | 681204 |
| 28.971521 | down | XM_001060746 | LOC681206 | 681206 |
| 2.6762145 | down | XM_001060776 | LOC681214 | 681214 |
| 34.52686  | down | XM_001060797 | LOC681220 | 681220 |
| 39.78892  | down | XM_001060840 | LOC681228 | 681228 |
| 42.607918 | down | XM_001060847 | LOC681230 | 681230 |
| 9.595362  | down | XM_001060874 | LOC681237 | 681237 |
| 38.742893 | down | XM_001060969 | LOC681259 | 681259 |
| 7.552107  | down | XM_001061032 | LOC681275 | 681275 |
| 46.330284 | down | XM_001061073 | LOC681283 | 681283 |
| 39.218327 | down | XM_001061123 | LOC681296 | 681296 |
| 54.47687  | down | XM_001061128 | LOC681299 | 681299 |
| 10.572636 | down | XM_001061188 | LOC681311 | 681311 |
| 2.1890028 | down | XM_001061226 | LOC681318 | 681318 |
| 11.155504 | down | XM_001061236 | LOC681322 | 681322 |
| 51.325264 | down | XM_001061284 | LOC681329 | 681329 |
| 28.836792 | down | XM_001061295 | LOC681332 | 681332 |
| 39.494003 | down | XM_001061298 | LOC681333 | 681333 |
| 26.947668 | down | XM_001061311 | LOC681335 | 681335 |
| 64.455475 | down | XM_001061313 | LOC681336 | 681336 |
| 45.547344 | down | XM_001061340 | LOC681341 | 681341 |
| 42.68419  | down | XM_001061355 | LOC681346 | 681346 |
| 10.3903   | down | XM_001061364 | LOC681350 | 681350 |
| 38.02511  | down | XM_001061372 | LOC681353 | 681353 |
| 2.4231074 | down | XM_001061373 | LOC681354 | 681354 |
| 21.329838 | down | XM_001061464 | LOC681372 | 681372 |
| 4.6621113 | down | XM_001061496 | LOC681382 | 681382 |
| 6.6339383 | down | XM_001059639 | LOC681383 | 681383 |
| 39.137306 | down | XM_001061547 | LOC681391 | 681391 |
| 55.382782 | down | XM_001061602 | LOC681405 | 681405 |
| 2.0835469 | down | XM_001061633 | LOC681411 | 681411 |
| 38.635033 | down | XM_001061638 | LOC681412 | 681412 |
| 2.3893917 | down | XM_001056840 | LOC681446 | 681446 |
| 4.68253   | down | XM_001056910 | LOC681457 | 681457 |
| 13.977492 | down | XM_001056987 | LOC681471 | 681471 |
| 43.115944 | down | XM_001057059 | LOC681486 | 681486 |
| 37.329353 | down | XM_001057300 | LOC681537 | 681537 |
| 4.165686  | down | XM_001057383 | LOC681552 | 681552 |
| 28.271978 | down | XM_001057478 | LOC681575 | 681575 |

|           |      |              |           |        |
|-----------|------|--------------|-----------|--------|
| 30.19091  | down | XM_001057495 | LOC681582 | 681582 |
| 10.213049 | down | XM_001057510 | LOC681587 | 681587 |
| 6.8896947 | down | XM_001057623 | LOC681610 | 681610 |
| 3.111232  | down | XM_001057644 | LOC681616 | 681616 |
| 18.927752 | down | XM_001057652 | LOC681620 | 681620 |
| 11.719363 | down | XM_001057676 | LOC681626 | 681626 |
| 4.439578  | down | XM_001057732 | LOC681643 | 681643 |
| 5.622571  | down | XM_001057737 | LOC681644 | 681644 |
| 41.202698 | down | XM_001057766 | LOC681652 | 681652 |
| 66.30763  | down | XM_001057769 | LOC681653 | 681653 |
| 2.255575  | down | XM_001057802 | LOC681664 | 681664 |
| 5.5393624 | down | XM_001057939 | LOC681685 | 681685 |
| 60.799988 | down | XM_001058241 | LOC681743 | 681743 |
| 2.9743376 | down | XM_001058322 | LOC681765 | 681765 |
| 57.75536  | down | XM_001058327 | LOC681766 | 681766 |
| 14.356676 | down | XM_001058573 | LOC681819 | 681819 |
| 12.298655 | down | XM_001058665 | LOC681839 | 681839 |
| 7.493009  | down | XM_001058688 | LOC681847 | 681847 |
| 6.2849956 | down | XM_001058855 | LOC681893 | 681893 |
| 30.134901 | down | XM_001059139 | LOC681968 | 681968 |
| 7.967875  | down | XM_001059190 | LOC681979 | 681979 |
| 2.4615016 | down | XM_001059425 | LOC682020 | 682020 |
| 2.7057428 | down | XM_001059486 | LOC682033 | 682033 |
| 25.532164 | down | XM_001059517 | LOC682039 | 682039 |
| 23.11028  | down | XM_001059537 | LOC682041 | 682041 |
| 5.867802  | down | XM_001059739 | LOC682078 | 682078 |
| 18.866392 | down | XM_001059853 | LOC682102 | 682102 |
| 50.739475 | down | XM_001060368 | LOC682197 | 682197 |
| 56.777546 | down | XM_001060373 | LOC682199 | 682199 |
| 5.1734924 | down | XM_001060429 | LOC682208 | 682208 |
| 70.90834  | down | XM_001060443 | LOC682210 | 682210 |
| 9.913683  | down | XM_001060490 | LOC682216 | 682216 |
| 4.5190907 | down | XM_001060537 | LOC682225 | 682225 |
| 11.509122 | down | XM_001060538 | LOC682226 | 682226 |
| 37.326847 | down | XM_001060609 | LOC682238 | 682238 |
| 9.405426  | down | XM_001060768 | LOC682270 | 682270 |
| 33.190823 | down | XM_001060854 | LOC682289 | 682289 |
| 2.8346028 | down | XM_001060911 | LOC682301 | 682301 |
| 43.040382 | down | XM_001060950 | LOC682310 | 682310 |
| 20.774624 | down | XM_001061095 | LOC682341 | 682341 |
| 2.0663476 | down | XM_001061167 | LOC682355 | 682355 |
| 12.020871 | down | XM_001061186 | LOC682360 | 682360 |
| 7.6646633 | down | XM_001061422 | LOC682416 | 682416 |
| 2.0271149 | down | XM_001061522 | LOC682438 | 682438 |

|           |      |              |           |        |
|-----------|------|--------------|-----------|--------|
| 21.595106 | down | XM_001061593 | LOC682458 | 682458 |
| 2.6184757 | down | XM_001061705 | LOC682487 | 682487 |
| 51.524536 | down | XM_001061832 | LOC682515 | 682515 |
| 3.1431513 | down | XM_001061917 | LOC682535 | 682535 |
| 11.765349 | down | XM_001061959 | LOC682543 | 682543 |
| 47.81573  | down | XM_001062011 | LOC682556 | 682556 |
| 3.564282  | down | XM_001062026 | LOC682560 | 682560 |
| 54.02105  | down | XM_001062148 | LOC682585 | 682585 |
| 6.5398784 | down | XM_001062158 | LOC682587 | 682587 |
| 29.587152 | down | XM_001062253 | LOC682603 | 682603 |
| 38.923714 | down | XM_001062440 | LOC682639 | 682639 |
| 7.004849  | down | XM_001062475 | LOC682647 | 682647 |
| 7.9182744 | down | XM_001062486 | LOC682649 | 682649 |
| 4.881095  | down | XM_001062593 | LOC682679 | 682679 |
| 30.80606  | down | XM_001062679 | LOC682695 | 682695 |
| 11.699973 | down | XM_001062684 | LOC682696 | 682696 |
| 33.05187  | down | XM_001062715 | LOC682701 | 682701 |
| 6.977499  | down | XM_001062737 | LOC682706 | 682706 |
| 48.236073 | down | XM_001062936 | LOC682754 | 682754 |
| 7.001122  | down | XM_001062944 | LOC682757 | 682757 |
| 21.755365 | down | XM_001063036 | LOC682774 | 682774 |
| 2.3642352 | down | XM_001063068 | LOC682778 | 682778 |
| 48.861904 | down | XM_001063145 | LOC682796 | 682796 |
| 7.818471  | down | XM_001063184 | LOC682803 | 682803 |
| 50.807777 | down | XM_001063233 | LOC682815 | 682815 |
| 2.2244785 | down | XM_001063311 | LOC682831 | 682831 |
| 9.265849  | down | XM_001063412 | LOC682856 | 682856 |
| 49.438286 | down | XM_001063439 | LOC682858 | 682858 |
| 37.774178 | down | XM_001063448 | LOC682859 | 682859 |
| 2.9351504 | down | XM_001061205 | LOC682869 | 682869 |
| 36.393497 | down | XM_001063558 | LOC682885 | 682885 |
| 34.228928 | down | XM_001063578 | LOC682891 | 682891 |
| 4.7058043 | down | XM_001063627 | LOC682906 | 682906 |
| 27.652246 | down | XM_001063744 | LOC682932 | 682932 |
| 5.3663554 | down | XM_001061259 | LOC682937 | 682937 |
| 10.005081 | down | XM_001060862 | LOC682938 | 682938 |
| 10.168259 | down | XM_001063846 | LOC682956 | 682956 |
| 2.5007684 | down | XM_001063879 | LOC682964 | 682964 |
| 14.833642 | down | XM_001063891 | LOC682966 | 682966 |
| 29.729624 | down | XM_001063918 | LOC682972 | 682972 |
| 38.663033 | down | XM_001064451 | LOC682986 | 682986 |
| 4.246557  | down | XM_001065118 | LOC682988 | 682988 |
| 45.990013 | down | XM_001064012 | LOC682996 | 682996 |
| 28.463457 | down | XM_001064138 | LOC683020 | 683020 |

|            |      |              |           |        |
|------------|------|--------------|-----------|--------|
| 3.4677138  | down | XM_001062345 | LOC683033 | 683033 |
| 3.5774925  | down | XM_001061331 | LOC683034 | 683034 |
| 6.9583635  | down | XM_001064196 | LOC683035 | 683035 |
| 13.916722  | down | XM_001064254 | LOC683045 | 683045 |
| 67.66212   | down | XM_001064336 | LOC683070 | 683070 |
| 3.853579   | down | XM_001058171 | LOC683077 | 683077 |
| 16.51926   | down | XM_001064410 | LOC683086 | 683086 |
| 2.926908   | down | XM_001062927 | LOC683099 | 683099 |
| 16.337212  | down | XM_001064639 | LOC683138 | 683138 |
| 10.782382  | down | XM_001064668 | LOC683146 | 683146 |
| 2.6641095  | down | XM_001064715 | LOC683158 | 683158 |
| 46.181953  | down | XM_001064734 | LOC683166 | 683166 |
| 47.96582   | down | XM_001064818 | LOC683184 | 683184 |
| 30.343609  | down | XM_001064924 | LOC683210 | 683210 |
| 6.4867268  | down | XM_001064967 | LOC683219 | 683219 |
| 12.815384  | down | XM_001064973 | LOC683221 | 683221 |
| 2.9230266  | down | XM_001064980 | LOC683223 | 683223 |
| 56.90545   | down | XM_001065020 | LOC683233 | 683233 |
| 25.104734  | down | XM_001065323 | LOC683308 | 683308 |
| 10.347362  | down | XM_001065424 | LOC683324 | 683324 |
| 2.0923808  | down | XM_001065432 | LOC683326 | 683326 |
| 4.7019095  | down | XM_001070523 | LOC683342 | 683342 |
| 100.02085  | down | XM_001065651 | LOC683369 | 683369 |
| 2.4604514  | down | XM_001065716 | LOC683389 | 683389 |
| 12.4439535 | down | XM_001065347 | LOC683460 | 683460 |
| 3.2430258  | down | XM_001066042 | LOC683463 | 683463 |
| 20.155195  | down | XM_001066056 | LOC683469 | 683469 |
| 5.650062   | down | XM_001066080 | LOC683472 | 683472 |
| 3.2296836  | down | XM_001061872 | LOC683474 | 683474 |
| 2.6640673  | down | XM_001066111 | LOC683479 | 683479 |
| 23.033321  | down | XM_001066162 | LOC683490 | 683490 |
| 113.04247  | down | XM_001066243 | LOC683507 | 683507 |
| 14.306933  | down | XM_001066437 | LOC683539 | 683539 |
| 3.9518266  | down | XM_001066476 | LOC683548 | 683548 |
| 4.7253833  | down | XM_001066521 | LOC683561 | 683561 |
| 5.49478    | down | XM_001066537 | LOC683564 | 683564 |
| 6.235927   | down | XM_001066659 | LOC683588 | 683588 |
| 27.647558  | down | XM_001066697 | LOC683601 | 683601 |
| 13.337028  | down | XM_001066822 | LOC683633 | 683633 |
| 40.11196   | down | XM_001066890 | LOC683649 | 683649 |
| 2.0007696  | down | XM_001067070 | LOC683689 | 683689 |
| 28.0463    | down | XM_001067117 | LOC683698 | 683698 |
| 10.066568  | down | XM_001067123 | LOC683700 | 683700 |
| 5.3299875  | down | XM_001064064 | LOC683722 | 683722 |

|           |      |              |           |        |
|-----------|------|--------------|-----------|--------|
| 5.856394  | down | XM_001067284 | LOC683741 | 683741 |
| 9.150478  | down | XM_001067289 | LOC683743 | 683743 |
| 2.2051275 | down | XM_001067331 | LOC683751 | 683751 |
| 2.4873846 | down | XM_001067334 | LOC683753 | 683753 |
| 3.190623  | down | XM_001064232 | LOC683788 | 683788 |
| 64.14812  | down | XM_001067513 | LOC683800 | 683800 |
| 40.65556  | down | XM_001067561 | LOC683806 | 683806 |
| 15.132651 | down | XM_001067758 | LOC683852 | 683852 |
| 9.775224  | down | XM_001067774 | LOC683855 | 683855 |
| 23.879774 | down | XM_001067816 | LOC683865 | 683865 |
| 57.00516  | down | XM_001067901 | LOC683878 | 683878 |
| 11.180309 | down | XM_001067987 | LOC683902 | 683902 |
| 10.036413 | down | XM_001068012 | LOC683908 | 683908 |
| 7.3334312 | down | XM_001068058 | LOC683919 | 683919 |
| 2.037515  | down | XM_001068062 | LOC683921 | 683921 |
| 72.11933  | down | XM_001068139 | LOC683944 | 683944 |
| 4.444441  | down | XM_001059945 | LOC683953 | 683953 |
| 43.155766 | down | XM_001068219 | LOC683958 | 683958 |
| 5.4214354 | down | XM_001068242 | LOC683965 | 683965 |
| 27.733185 | down | XM_001068264 | LOC683970 | 683970 |
| 84.12614  | down | XM_001068277 | LOC683973 | 683973 |
| 7.3764906 | down | XM_001068380 | LOC683990 | 683990 |
| 39.369003 | down | XM_001068387 | LOC683992 | 683992 |
| 21.59761  | down | XM_001068467 | LOC684009 | 684009 |
| 6.16242   | down | XM_001068831 | LOC684077 | 684077 |
| 31.072342 | down | XM_001068852 | LOC684083 | 684083 |
| 43.43878  | down | XM_001068871 | LOC684087 | 684087 |
| 2.8977213 | down | XM_001068952 | LOC684105 | 684105 |
| 20.854448 | down | XM_001069018 | LOC684119 | 684119 |
| 2.3398454 | down | XM_001069045 | LOC684125 | 684125 |
| 34.748844 | down | XM_001069050 | LOC684128 | 684128 |
| 31.510792 | down | XM_001069080 | LOC684134 | 684134 |
| 11.799877 | down | XM_001069099 | LOC684138 | 684138 |
| 14.921711 | down | XM_001069294 | LOC684180 | 684180 |
| 3.643424  | down | XM_001069416 | LOC684209 | 684209 |
| 12.459144 | down | XM_001069434 | LOC684215 | 684215 |
| 13.299426 | down | XM_001069592 | LOC684254 | 684254 |
| 2.99279   | down | XM_001069706 | LOC684280 | 684280 |
| 6.4510317 | down | XM_001069722 | LOC684285 | 684285 |
| 67.63424  | down | XM_001069803 | LOC684306 | 684306 |
| 84.69002  | down | XM_001069913 | LOC684337 | 684337 |
| 16.190151 | down | XM_001070181 | LOC684393 | 684393 |
| 35.31649  | down | XM_001070572 | LOC684471 | 684471 |
| 75.3441   | down | XM_001070790 | LOC684515 | 684515 |

|           |      |              |           |        |
|-----------|------|--------------|-----------|--------|
| 4.1310687 | down | XM_001070830 | LOC684525 | 684525 |
| 2.346958  | down | XM_001070844 | LOC684529 | 684529 |
| 2.1879547 | down | XM_001070960 | LOC684556 | 684556 |
| 20.108915 | down | XM_001070974 | LOC684559 | 684559 |
| 38.101532 | down | XM_001071070 | LOC684575 | 684575 |
| 45.4884   | down | XM_001071142 | LOC684587 | 684587 |
| 6.764408  | down | XM_001071212 | LOC684605 | 684605 |
| 37.83255  | down | XM_001071307 | LOC684627 | 684627 |
| 84.88739  | down | XM_001055278 | LOC684652 | 684652 |
| 10.947163 | down | XM_001071489 | LOC684660 | 684660 |
| 2.593608  | down | XM_001071632 | LOC684692 | 684692 |
| 49.30169  | down | XM_001071663 | LOC684706 | 684706 |
| 2.4317136 | down | XM_001071688 | LOC684715 | 684715 |
| 6.534451  | down | XM_001071690 | LOC684716 | 684716 |
| 65.99255  | down | XM_001071746 | LOC684725 | 684725 |
| 14.090421 | down | XM_001071766 | LOC684730 | 684730 |
| 60.237682 | down | XM_001071819 | LOC684746 | 684746 |
| 5.7560277 | down | XM_001071837 | LOC684753 | 684753 |
| 13.760056 | down | XM_001071876 | LOC684769 | 684769 |
| 16.058575 | down | XM_001071887 | LOC684773 | 684773 |
| 30.943558 | down | XM_001071888 | LOC684774 | 684774 |
| 5.9639482 | down | XM_001071901 | LOC684776 | 684776 |
| 66.17719  | down | XM_001071914 | LOC684779 | 684779 |
| 16.960512 | down | XM_001071929 | LOC684782 | 684782 |
| 30.764902 | down | XM_001071939 | LOC684787 | 684787 |
| 4.0450435 | down | XM_001071963 | LOC684792 | 684792 |
| 6.0569754 | down | XM_001071973 | LOC684798 | 684798 |
| 36.072422 | down | XM_001072000 | LOC684803 | 684803 |
| 5.723761  | down | XM_001072050 | LOC684819 | 684819 |
| 4.9646444 | down | XM_001072065 | LOC684822 | 684822 |
| 50.601326 | down | XM_001072070 | LOC684824 | 684824 |
| 60.95214  | down | XM_001072084 | LOC684827 | 684827 |
| 2.030189  | down | XM_001072089 | LOC684828 | 684828 |
| 44.89923  | down | XM_001072117 | LOC684833 | 684833 |
| 7.8520985 | down | XM_001072148 | LOC684840 | 684840 |
| 17.18831  | down | XM_001072184 | LOC684850 | 684850 |
| 15.348039 | down | XM_001072236 | LOC684864 | 684864 |
| 2.3679929 | down | XM_001072266 | LOC684871 | 684871 |
| 7.9215126 | down | XM_001072267 | LOC684872 | 684872 |
| 12.434995 | down | XM_001072294 | LOC684879 | 684879 |
| 4.041843  | down | XM_001072338 | LOC684888 | 684888 |
| 27.724388 | down | XM_001072371 | LOC684897 | 684897 |
| 21.871195 | down | XM_001072377 | LOC684898 | 684898 |
| 2.6448288 | down | XM_001072410 | LOC684907 | 684907 |

|           |      |              |           |        |
|-----------|------|--------------|-----------|--------|
| 57.59253  | down | XM_001072445 | LOC684915 | 684915 |
| 2.2573156 | down | XM_001072630 | LOC684947 | 684947 |
| 5.1243143 | down | XM_001061754 | LOC684978 | 684978 |
| 31.291628 | down | XM_001061782 | LOC684986 | 684986 |
| 12.488226 | down | XM_001061793 | LOC684989 | 684989 |
| 72.58083  | down | XM_001061802 | LOC684990 | 684990 |
| 23.616804 | down | XM_001061833 | LOC684993 | 684993 |
| 26.286036 | down | XM_001061848 | LOC684998 | 684998 |
| 7.7777634 | down | XM_001061886 | LOC685007 | 685007 |
| 46.8872   | down | XM_001061927 | LOC685018 | 685018 |
| 34.706654 | down | XM_001061948 | LOC685019 | 685019 |
| 7.3976684 | down | XM_001062010 | LOC685030 | 685030 |
| 2.9894662 | down | XM_001062044 | LOC685040 | 685040 |
| 60.36003  | down | XM_001057025 | LOC685044 | 685044 |
| 11.288925 | down | XM_001062057 | LOC685046 | 685046 |
| 61.207943 | down | XM_001062073 | LOC685053 | 685053 |
| 6.1912713 | down | XM_001062123 | LOC685060 | 685060 |
| 17.821451 | down | XM_001062130 | LOC685064 | 685064 |
| 46.20162  | down | XM_001062150 | LOC685071 | 685071 |
| 34.295967 | down | XM_001062177 | LOC685075 | 685075 |
| 7.992132  | down | XM_001062252 | LOC685089 | 685089 |
| 35.164825 | down | XM_001062311 | LOC685105 | 685105 |
| 3.9626734 | down | XM_001062332 | LOC685109 | 685109 |
| 48.328423 | down | XM_001063598 | LOC685110 | 685110 |
| 6.0094266 | down | XM_001062388 | LOC685120 | 685120 |
| 3.1492083 | down | XM_001062416 | LOC685124 | 685124 |
| 49.84199  | down | XM_001062428 | LOC685125 | 685125 |
| 2.322914  | down | XM_001062604 | LOC685160 | 685160 |
| 20.605654 | down | XM_001062622 | LOC685162 | 685162 |
| 25.02738  | down | XM_001062656 | LOC685166 | 685166 |
| 33.190987 | down | XM_001062681 | LOC685176 | 685176 |
| 6.6639156 | down | XM_001058763 | LOC685178 | 685178 |
| 35.395756 | down | XM_001062718 | LOC685183 | 685183 |
| 40.94081  | down | XM_001062796 | LOC685205 | 685205 |
| 4.301106  | down | XM_001062816 | LOC685208 | 685208 |
| 20.152956 | down | XM_001062826 | LOC685210 | 685210 |
| 46.46998  | down | XM_001062892 | LOC685226 | 685226 |
| 12.612435 | down | XM_001062910 | LOC685231 | 685231 |
| 31.001274 | down | XM_001062972 | LOC685242 | 685242 |
| 2.6635866 | down | XM_001060017 | LOC685244 | 685244 |
| 27.31596  | down | XM_001063120 | LOC685275 | 685275 |
| 49.475063 | down | XM_001057196 | LOC685285 | 685285 |
| 35.7738   | down | XM_001063186 | LOC685291 | 685291 |
| 55.32943  | down | XM_001057314 | LOC685300 | 685300 |

|            |      |              |           |        |
|------------|------|--------------|-----------|--------|
| 65.62106   | down | XM_001063228 | LOC685303 | 685303 |
| 29.332785  | down | XM_001063242 | LOC685306 | 685306 |
| 144.83769  | down | XM_001063338 | LOC685323 | 685323 |
| 4.2195783  | down | XM_001057424 | LOC685331 | 685331 |
| 17.598925  | down | XM_001063413 | LOC685340 | 685340 |
| 6.392415   | down | XM_001063414 | LOC685341 | 685341 |
| 81.50776   | down | XM_001057537 | LOC685344 | 685344 |
| 56.178562  | down | XM_001063434 | LOC685347 | 685347 |
| 48.813026  | down | XM_001063435 | LOC685348 | 685348 |
| 43.74813   | down | XM_001063442 | LOC685349 | 685349 |
| 65.107124  | down | XM_001063496 | LOC685363 | 685363 |
| 31.594494  | down | XM_001063504 | LOC685366 | 685366 |
| 63.550095  | down | XM_001063513 | LOC685369 | 685369 |
| 26.356415  | down | XM_001063529 | LOC685371 | 685371 |
| 5.7822213  | down | XM_001063533 | LOC685372 | 685372 |
| 8.195505   | down | XM_001063547 | LOC685376 | 685376 |
| 44.309963  | down | XM_001063548 | LOC685377 | 685377 |
| 55.997963  | down | XM_001063606 | LOC685392 | 685392 |
| 6.0262136  | down | XM_001063633 | LOC685397 | 685397 |
| 99.70129   | down | XM_001063655 | LOC685403 | 685403 |
| 33.09599   | down | XM_001063692 | LOC685411 | 685411 |
| 21.525541  | down | XM_001063696 | LOC685414 | 685414 |
| 60.34457   | down | XM_001063747 | LOC685424 | 685424 |
| 10.3155775 | down | XM_001063765 | LOC685428 | 685428 |
| 46.817806  | down | XM_001063769 | LOC685429 | 685429 |
| 67.85382   | down | XM_001057638 | LOC685435 | 685435 |
| 41.43775   | down | XM_001063788 | LOC685437 | 685437 |
| 64.71326   | down | XM_001063799 | LOC685442 | 685442 |
| 2.9300306  | down | XM_001057762 | LOC685449 | 685449 |
| 2.852654   | down | XM_001063855 | LOC685454 | 685454 |
| 7.066689   | down | XM_001063875 | LOC685458 | 685458 |
| 47.909035  | down | XM_001063877 | LOC685459 | 685459 |
| 37.411713  | down | XM_001063881 | LOC685460 | 685460 |
| 23.41377   | down | XM_001063912 | LOC685469 | 685469 |
| 42.076637  | down | XM_001063931 | LOC685476 | 685476 |
| 10.806789  | down | XM_001061142 | LOC685482 | 685482 |
| 37.306534  | down | XM_001063977 | LOC685484 | 685484 |
| 56.472034  | down | XM_001063993 | LOC685488 | 685488 |
| 36.530582  | down | XM_001064025 | LOC685493 | 685493 |
| 5.663477   | down | XM_001064032 | LOC685494 | 685494 |
| 40.512356  | down | XM_001064038 | LOC685496 | 685496 |
| 3.4976676  | down | XM_001064056 | LOC685501 | 685501 |
| 18.546452  | down | XM_001064061 | LOC685503 | 685503 |
| 32.8828    | down | XM_001064084 | LOC685509 | 685509 |



|           |      |              |           |        |
|-----------|------|--------------|-----------|--------|
| 26.529219 | down | XM_001064094 | LOC685512 | 685512 |
| 49.511265 | down | XM_001064100 | LOC685513 | 685513 |
| 13.596217 | down | XM_001064154 | LOC685526 | 685526 |
| 49.658073 | down | XM_001064282 | LOC685552 | 685552 |
| 21.890896 | down | XM_001064306 | LOC685559 | 685559 |
| 38.305103 | down | XM_001064312 | LOC685563 | 685563 |
| 49.69571  | down | XM_001064363 | LOC685573 | 685573 |
| 4.122992  | down | XM_001064431 | LOC685585 | 685585 |
| 41.25857  | down | XM_001064447 | LOC685593 | 685593 |
| 15.639191 | down | XM_001054124 | LOC685594 | 685594 |
| 3.814826  | down | XM_001064471 | LOC685597 | 685597 |
| 6.1858735 | down | XM_001064490 | LOC685601 | 685601 |
| 23.885727 | down | XM_001064502 | LOC685604 | 685604 |
| 51.302826 | down | XM_001057826 | LOC685609 | 685609 |
| 6.894287  | down | XM_001064534 | LOC685616 | 685616 |
| 37.138332 | down | XM_001064543 | LOC685617 | 685617 |
| 13.182072 | down | XM_001064598 | LOC685632 | 685632 |
| 30.885838 | down | XM_001064613 | LOC685636 | 685636 |
| 15.781533 | down | XM_001064644 | LOC685643 | 685643 |
| 13.74766  | down | XM_001064652 | LOC685645 | 685645 |
| 35.18665  | down | XM_001064704 | LOC685661 | 685661 |
| 16.755354 | down | XM_001064718 | LOC685663 | 685663 |
| 7.4317627 | down | XM_001064759 | LOC685667 | 685667 |
| 34.965855 | down | XM_001064760 | LOC685668 | 685668 |
| 2.5573652 | down | XM_001064894 | LOC685699 | 685699 |
| 50.161648 | down | XM_001064946 | LOC685711 | 685711 |
| 42.787697 | down | XM_001064972 | LOC685717 | 685717 |
| 9.668001  | down | XM_001064987 | LOC685720 | 685720 |
| 22.582552 | down | XM_001064994 | LOC685722 | 685722 |
| 2.3963625 | down | XM_001065028 | LOC685729 | 685729 |
| 92.38186  | down | XM_001065049 | LOC685735 | 685735 |
| 13.931398 | down | XM_001065085 | LOC685742 | 685742 |
| 13.955427 | down | XM_001065090 | LOC685743 | 685743 |
| 76.58995  | down | XM_001065160 | LOC685759 | 685759 |
| 70.23497  | down | XM_001065161 | LOC685760 | 685760 |
| 8.832701  | down | XM_001065164 | LOC685763 | 685763 |
| 6.110524  | down | XM_001065185 | LOC685767 | 685767 |
| 83.57015  | down | XM_001065189 | LOC685769 | 685769 |
| 86.86864  | down | XM_001065214 | LOC685773 | 685773 |
| 75.26684  | down | XM_001057991 | LOC685779 | 685779 |
| 4.221198  | down | XM_001065266 | LOC685784 | 685784 |
| 43.42222  | down | XM_001065272 | LOC685786 | 685786 |
| 55.68025  | down | XM_217497    | LOC685792 | 685792 |
| 51.987514 | down | XM_001065304 | LOC685796 | 685796 |

|           |      |              |           |        |
|-----------|------|--------------|-----------|--------|
| 35.06623  | down | XM_001065305 | LOC685797 | 685797 |
| 88.7873   | down | XM_001065332 | LOC685805 | 685805 |
| 7.749696  | down | XM_001065358 | LOC685810 | 685810 |
| 79.488884 | down | XM_001065446 | LOC685835 | 685835 |
| 78.367676 | down | XM_001065511 | LOC685853 | 685853 |
| 43.07952  | down | XM_001065537 | LOC685863 | 685863 |
| 52.459595 | down | XM_001065550 | LOC685864 | 685864 |
| 2.470529  | down | XM_001065551 | LOC685865 | 685865 |
| 64.81163  | down | XM_001065569 | LOC685871 | 685871 |
| 36.19778  | down | XM_001065570 | LOC685872 | 685872 |
| 12.661789 | down | XM_001065626 | LOC685885 | 685885 |
| 15.318807 | down | XM_001062645 | LOC685888 | 685888 |
| 44.1653   | down | XM_001065656 | LOC685891 | 685891 |
| 3.4513662 | down | XM_001065667 | LOC685894 | 685894 |
| 31.154621 | down | XM_001065677 | LOC685898 | 685898 |
| 31.021404 | down | XM_001065688 | LOC685901 | 685901 |
| 34.73897  | down | XM_001065695 | LOC685904 | 685904 |
| 78.72594  | down | XM_001065708 | LOC685905 | 685905 |
| 45.658836 | down | XM_001065719 | LOC685908 | 685908 |
| 17.570324 | down | XM_001065720 | LOC685909 | 685909 |
| 66.03406  | down | XM_001065748 | LOC685918 | 685918 |
| 26.496717 | down | XM_001065784 | LOC685926 | 685926 |
| 45.767227 | down | XM_001065801 | LOC685929 | 685929 |
| 3.8365772 | down | XM_001065802 | LOC685930 | 685930 |
| 2.826458  | down | XM_001065897 | LOC685947 | 685947 |
| 40.034256 | down | XM_001065901 | LOC685948 | 685948 |
| 56.816067 | down | XM_001065963 | LOC685965 | 685965 |
| 65.72191  | down | XM_001065967 | LOC685966 | 685966 |
| 53.928425 | down | XM_001065995 | LOC685968 | 685968 |
| 38.731716 | down | XM_001066016 | LOC685974 | 685974 |
| 8.914893  | down | XM_001066071 | LOC685986 | 685986 |
| 45.155655 | down | XM_001066074 | LOC685987 | 685987 |
| 52.15992  | down | XM_001066078 | LOC685988 | 685988 |
| 78.015114 | down | XM_001066079 | LOC685989 | 685989 |
| 26.48578  | down | XM_001066081 | LOC685990 | 685990 |
| 73.63794  | down | XM_001066107 | LOC685994 | 685994 |
| 26.925642 | down | XM_001066158 | LOC686010 | 686010 |
| 2.889335  | down | XM_001066168 | LOC686013 | 686013 |
| 79.83359  | down | XM_001066192 | LOC686017 | 686017 |
| 64.340324 | down | XM_001066193 | LOC686018 | 686018 |
| 26.488224 | down | XM_001066217 | LOC686023 | 686023 |
| 5.7117534 | down | XM_001066247 | LOC686030 | 686030 |
| 18.154266 | down | XM_001066250 | LOC686031 | 686031 |
| 18.76002  | down | XM_001066280 | LOC686036 | 686036 |

|           |      |              |           |        |
|-----------|------|--------------|-----------|--------|
| 30.272615 | down | XM_001066294 | LOC686038 | 686038 |
| 101.15336 | down | XM_001066301 | LOC686041 | 686041 |
| 19.44372  | down | XM_001066333 | LOC686046 | 686046 |
| 4.517275  | down | XM_001066349 | LOC686051 | 686051 |
| 88.00687  | down | XM_001066356 | LOC686053 | 686053 |
| 45.30945  | down | XM_001066372 | LOC686058 | 686058 |
| 22.077534 | down | XM_001066380 | LOC686061 | 686061 |
| 12.796879 | down | XM_001066400 | LOC686068 | 686068 |
| 62.673424 | down | XM_001066470 | LOC686082 | 686082 |
| 13.190135 | down | XM_001066471 | LOC686083 | 686083 |
| 28.404297 | down | XM_001066478 | LOC686085 | 686085 |
| 3.1184704 | down | XM_001066513 | LOC686092 | 686092 |
| 2.612402  | down | XM_001066552 | LOC686103 | 686103 |
| 21.516031 | down | XM_001066563 | LOC686107 | 686107 |
| 3.0318599 | down | XM_001066569 | LOC686109 | 686109 |
| 8.502085  | down | XM_001066582 | LOC686113 | 686113 |
| 23.570747 | down | XM_001066607 | LOC686119 | 686119 |
| 68.05165  | down | XM_001066623 | LOC686126 | 686126 |
| 97.32427  | down | XM_001066636 | LOC686130 | 686130 |
| 53.660427 | down | XM_001066637 | LOC686131 | 686131 |
| 49.043133 | down | XM_001066652 | LOC686135 | 686135 |
| 86.87125  | down | XM_001066658 | LOC686138 | 686138 |
| 2.7633426 | down | XM_001066685 | LOC686146 | 686146 |
| 59.867725 | down | XM_001066698 | LOC686147 | 686147 |
| 9.193101  | down | XM_001072665 | LOC686151 | 686151 |
| 29.625914 | down | XM_001072725 | LOC686165 | 686165 |
| 12.218003 | down | XM_001072815 | LOC686189 | 686189 |
| 2.391988  | down | XM_001072847 | LOC686198 | 686198 |
| 51.065712 | down | XM_001072947 | LOC686222 | 686222 |
| 23.536821 | down | XM_001073195 | LOC686269 | 686269 |
| 3.8735201 | down | XM_001073234 | LOC686274 | 686274 |
| 3.1778831 | down | XM_001073302 | LOC686288 | 686288 |
| 13.54863  | down | XM_001073336 | LOC686292 | 686292 |
| 3.467503  | down | XM_001073372 | LOC686298 | 686298 |
| 41.33542  | down | XM_001073483 | LOC686312 | 686312 |
| 3.0105715 | down | XM_001073659 | LOC686342 | 686342 |
| 3.4403744 | down | XM_001073688 | LOC686349 | 686349 |
| 4.50232   | down | XM_001073812 | LOC686374 | 686374 |
| 27.635242 | down | XM_001073883 | LOC686385 | 686385 |
| 19.057858 | down | XM_001073908 | LOC686388 | 686388 |
| 28.171556 | down | XM_001073953 | LOC686402 | 686402 |
| 17.446665 | down | XM_001073995 | LOC686411 | 686411 |
| 15.779254 | down | XM_001074093 | LOC686437 | 686437 |
| 3.3428009 | down | XM_001074123 | LOC686441 | 686441 |

|           |      |              |           |        |
|-----------|------|--------------|-----------|--------|
| 36.39148  | down | XM_001074203 | LOC686458 | 686458 |
| 10.551707 | down | XM_001074697 | LOC686550 | 686550 |
| 8.634127  | down | XM_001074770 | LOC686567 | 686567 |
| 7.6202745 | down | XM_001074822 | LOC686576 | 686576 |
| 17.9321   | down | XM_001074929 | LOC686602 | 686602 |
| 32.513294 | down | XM_001075007 | LOC686620 | 686620 |
| 18.866362 | down | XM_001075122 | LOC686647 | 686647 |
| 7.780502  | down | XM_001075152 | LOC686657 | 686657 |
| 47.961777 | down | XM_001075396 | LOC686718 | 686718 |
| 67.67914  | down | XM_001075397 | LOC686719 | 686719 |
| 53.041466 | down | XM_001075421 | LOC686726 | 686726 |
| 25.4857   | down | XM_001075726 | LOC686784 | 686784 |
| 40.67228  | down | XM_001075792 | LOC686805 | 686805 |
| 10.477555 | down | XM_001075922 | LOC686833 | 686833 |
| 3.1959562 | down | XM_001076002 | LOC686849 | 686849 |
| 28.678259 | down | XM_001076338 | LOC686921 | 686921 |
| 7.477935  | down | XM_001079025 | LOC686930 | 686930 |
| 18.691704 | down | XM_001076367 | LOC686931 | 686931 |
| 42.335423 | down | XM_001076379 | LOC686934 | 686934 |
| 23.504473 | down | XM_001076667 | LOC686997 | 686997 |
| 8.49451   | down | XM_001076650 | LOC686999 | 686999 |
| 5.4545984 | down | XM_001076680 | LOC687001 | 687001 |
| 43.930584 | down | XM_001076692 | LOC687003 | 687003 |
| 2.5006578 | down | XM_001076731 | LOC687014 | 687014 |
| 75.027756 | down | XM_001076767 | LOC687021 | 687021 |
| 4.8002567 | down | XM_001078538 | LOC687022 | 687022 |
| 6.0898237 | down | XM_001076805 | LOC687033 | 687033 |
| 10.028852 | down | XM_001076829 | LOC687039 | 687039 |
| 2.643504  | down | XM_001076904 | LOC687056 | 687056 |
| 102.5269  | down | XM_001076927 | LOC687062 | 687062 |
| 50.942616 | down | XM_001076949 | LOC687067 | 687067 |
| 42.226307 | down | XM_001077103 | LOC687100 | 687100 |
| 29.868961 | down | XM_001077115 | LOC687103 | 687103 |
| 42.41067  | down | XM_001077135 | LOC687109 | 687109 |
| 2.1371982 | down | XM_001077136 | LOC687110 | 687110 |
| 44.419483 | down | XM_001077138 | LOC687111 | 687111 |
| 11.644762 | down | XM_001077149 | LOC687116 | 687116 |
| 32.41866  | down | XM_001077217 | LOC687140 | 687140 |
| 9.799984  | down | XM_001077230 | LOC687143 | 687143 |
| 40.180576 | down | XM_001077315 | LOC687164 | 687164 |
| 75.995415 | down | XM_001077430 | LOC687185 | 687185 |
| 8.373547  | down | XM_001077517 | LOC687207 | 687207 |
| 21.33105  | down | XM_001077519 | LOC687208 | 687208 |
| 2.0591085 | down | XM_001077635 | LOC687233 | 687233 |

|           |      |              |           |        |
|-----------|------|--------------|-----------|--------|
| 6.975523  | down | XM_001077684 | LOC687244 | 687244 |
| 9.283893  | down | XM_001077729 | LOC687257 | 687257 |
| 6.793201  | down | XM_001077837 | LOC687284 | 687284 |
| 3.335757  | down | XM_001077911 | LOC687302 | 687302 |
| 30.818657 | down | XM_001077913 | LOC687303 | 687303 |
| 7.0113807 | down | XM_001077997 | LOC687326 | 687326 |
| 3.4524786 | down | XM_001078010 | LOC687329 | 687329 |
| 42.33868  | down | XM_001078031 | LOC687332 | 687332 |
| 9.617699  | down | XM_001078036 | LOC687334 | 687334 |
| 54.550797 | down | XM_001078051 | LOC687341 | 687341 |
| 21.879301 | down | XM_001078132 | LOC687356 | 687356 |
| 46.31574  | down | XM_001078171 | LOC687363 | 687363 |
| 4.0904174 | down | XM_001078298 | LOC687387 | 687387 |
| 2.8768554 | down | XM_001078323 | LOC687393 | 687393 |
| 13.634027 | down | XM_001078329 | LOC687396 | 687396 |
| 3.0763175 | down | XM_001078361 | LOC687399 | 687399 |
| 19.113956 | down | XM_001078386 | LOC687401 | 687401 |
| 7.9293084 | down | XM_001078464 | LOC687416 | 687416 |
| 23.722473 | down | XM_001078530 | LOC687432 | 687432 |
| 23.146046 | down | XM_001078536 | LOC687434 | 687434 |
| 26.812529 | down | XM_001078688 | LOC687464 | 687464 |
| 12.445636 | down | XM_001078823 | LOC687493 | 687493 |
| 39.552956 | down | XM_001078830 | LOC687494 | 687494 |
| 54.45329  | down | XM_001078866 | LOC687506 | 687506 |
| 2.6779017 | down | XM_001075606 | LOC687508 | 687508 |
| 41.678745 | down | XM_001078885 | LOC687512 | 687512 |
| 2.2246594 | down | XM_001078888 | LOC687513 | 687513 |
| 4.2787404 | down | XM_001078904 | LOC687516 | 687516 |
| 14.257421 | down | XM_001078905 | LOC687517 | 687517 |
| 39.02891  | down | XM_001079008 | LOC687537 | 687537 |
| 80.073616 | down | XM_001079048 | LOC687546 | 687546 |
| 43.370266 | down | XM_001079078 | LOC687553 | 687553 |
| 3.0506942 | down | XM_001079200 | LOC687573 | 687573 |
| 36.069107 | down | XM_001079213 | LOC687577 | 687577 |
| 83.58769  | down | XM_001079286 | LOC687589 | 687589 |
| 27.110493 | down | XM_001079425 | LOC687619 | 687619 |
| 4.316467  | down | XM_001079474 | LOC687636 | 687636 |
| 10.323531 | down | XM_001079481 | LOC687638 | 687638 |
| 28.606009 | down | XM_001079500 | LOC687642 | 687642 |
| 17.630638 | down | XM_001079501 | LOC687643 | 687643 |
| 4.101265  | down | XM_001079557 | LOC687650 | 687650 |
| 48.335884 | down | XM_001079569 | LOC687652 | 687652 |
| 24.37251  | down | XM_001079681 | LOC687675 | 687675 |
| 84.44011  | down | XM_001079796 | LOC687695 | 687695 |

|           |      |              |           |        |
|-----------|------|--------------|-----------|--------|
| 2.803369  | down | XM_001079840 | LOC687704 | 687704 |
| 2.5558474 | down | XM_001079780 | LOC687707 | 687707 |
| 14.858839 | down | XM_001079867 | LOC687710 | 687710 |
| 3.667524  | down | XM_001079883 | LOC687714 | 687714 |
| 16.30547  | down | XM_001079922 | LOC687721 | 687721 |
| 2.7317758 | down | XM_001079932 | LOC687726 | 687726 |
| 47.486393 | down | XM_001079968 | LOC687736 | 687736 |
| 28.73535  | down | XM_001079985 | LOC687742 | 687742 |
| 6.381651  | down | XM_001080001 | LOC687746 | 687746 |
| 4.2066255 | down | XM_001080031 | LOC687759 | 687759 |
| 2.2726495 | down | XM_001080152 | LOC687789 | 687789 |
| 5.45598   | down | XM_001080173 | LOC687793 | 687793 |
| 7.7819366 | down | XM_001080273 | LOC687827 | 687827 |
| 2.4385412 | down | XM_001080339 | LOC687849 | 687849 |
| 3.8105552 | down | XM_001080355 | LOC687853 | 687853 |
| 3.3205252 | down | XM_001080410 | LOC687866 | 687866 |
| 67.74615  | down | XM_001080491 | LOC687900 | 687900 |
| 14.155491 | down | XM_001080548 | LOC687915 | 687915 |
| 28.210934 | down | XM_001080561 | LOC687920 | 687920 |
| 43.752308 | down | XM_001080585 | LOC687929 | 687929 |
| 65.63802  | down | XM_001080588 | LOC687931 | 687931 |
| 10.693789 | down | XM_001080598 | LOC687936 | 687936 |
| 3.4035645 | down | XM_001080603 | LOC687939 | 687939 |
| 32.25568  | down | XM_001080652 | LOC687954 | 687954 |
| 32.060017 | down | XM_001080671 | LOC687961 | 687961 |
| 11.302204 | down | XM_001080713 | LOC687970 | 687970 |
| 11.156057 | down | XM_001080743 | LOC687980 | 687980 |
| 2.5435648 | down | XM_001080803 | LOC687990 | 687990 |
| 35.549896 | down | XM_001080804 | LOC687991 | 687991 |
| 3.56501   | down | XM_001080827 | LOC687999 | 687999 |
| 19.373905 | down | XM_001080924 | LOC688029 | 688029 |
| 16.333685 | down | XM_001080957 | LOC688040 | 688040 |
| 5.8442545 | down | XM_001080989 | LOC688054 | 688054 |
| 32.86658  | down | XM_001080993 | LOC688055 | 688055 |
| 43.82072  | down | XM_001081032 | LOC688068 | 688068 |
| 25.312422 | down | XM_001081035 | LOC688069 | 688069 |
| 13.189616 | down | XM_001081064 | LOC688077 | 688077 |
| 48.839493 | down | XM_001081092 | LOC688091 | 688091 |
| 4.61995   | down | XM_001081134 | LOC688099 | 688099 |
| 2.2508192 | down | XM_001081169 | LOC688111 | 688111 |
| 23.833055 | down | XM_001081232 | LOC688127 | 688127 |
| 42.923676 | down | XM_001081282 | LOC688143 | 688143 |
| 80.45909  | down | XM_001081341 | LOC688160 | 688160 |
| 44.00499  | down | XM_001081359 | LOC688164 | 688164 |

|            |      |              |           |        |
|------------|------|--------------|-----------|--------|
| 70.94897   | down | XM_001081391 | LOC688172 | 688172 |
| 57.32129   | down | XM_001081397 | LOC688175 | 688175 |
| 2.1945555  | down | XM_001081415 | LOC688177 | 688177 |
| 44.21674   | down | XM_001081419 | LOC688178 | 688178 |
| 4.191743   | down | XM_001081440 | LOC688192 | 688192 |
| 6.935994   | down | XM_001081497 | LOC688205 | 688205 |
| 6.330815   | down | XM_001081516 | LOC688213 | 688213 |
| 36.072315  | down | XM_001081518 | LOC688215 | 688215 |
| 46.578712  | down | XM_001081523 | LOC688217 | 688217 |
| 5.141325   | down | XM_001081533 | LOC688219 | 688219 |
| 4.842204   | down | XM_001081580 | LOC688234 | 688234 |
| 6.1850004  | down | XM_001081610 | LOC688241 | 688241 |
| 2.9697354  | down | XM_001081618 | LOC688242 | 688242 |
| 62.575146  | down | XM_001081629 | LOC688246 | 688246 |
| 25.374475  | down | XM_001081638 | LOC688247 | 688247 |
| 36.55016   | down | XM_001081643 | LOC688249 | 688249 |
| 12.705298  | down | XM_001081650 | LOC688251 | 688251 |
| 2.5136676  | down | XM_001081683 | LOC688256 | 688256 |
| 29.654324  | down | XM_001081727 | LOC688274 | 688274 |
| 20.209259  | down | XM_001081740 | LOC688282 | 688282 |
| 45.365955  | down | XM_001081781 | LOC688302 | 688302 |
| 2.2769256  | down | XM_001081840 | LOC688314 | 688314 |
| 2.8886235  | down | XM_001081814 | LOC688319 | 688319 |
| 2.4822097  | down | XM_001081836 | LOC688330 | 688330 |
| 5.62864    | down | XM_001081872 | LOC688345 | 688345 |
| 78.92832   | down | XM_001081886 | LOC688351 | 688351 |
| 21.970222  | down | XM_001081890 | LOC688353 | 688353 |
| 3.9082124  | down | XM_001081904 | LOC688361 | 688361 |
| 15.829228  | down | XM_001081918 | LOC688370 | 688370 |
| 52.18425   | down | XM_001081935 | LOC688377 | 688377 |
| 13.163729  | down | XM_001081936 | LOC688378 | 688378 |
| 13.993079  | down | XM_001081939 | LOC688379 | 688379 |
| 4.6552916  | down | XM_001081946 | LOC688383 | 688383 |
| 40.969944  | down | XM_001081948 | LOC688384 | 688384 |
| 5.9995613  | down | XM_001066771 | LOC688398 | 688398 |
| 76.661674  | down | XM_001066775 | LOC688399 | 688399 |
| 83.58432   | down | XM_001066825 | LOC688410 | 688410 |
| 108.043884 | down | XM_001066840 | LOC688414 | 688414 |
| 9.015441   | down | XM_001066867 | LOC688421 | 688421 |
| 2.3496404  | down | XM_001066874 | LOC688424 | 688424 |
| 59.325157  | down | XM_001066883 | LOC688426 | 688426 |
| 79.652885  | down | XM_001066895 | LOC688428 | 688428 |
| 32.495083  | down | XM_001066911 | LOC688431 | 688431 |
| 96.59045   | down | XM_001066958 | LOC688441 | 688441 |

|           |      |              |           |        |
|-----------|------|--------------|-----------|--------|
| 79.4378   | down | XM_001066993 | LOC688450 | 688450 |
| 84.960815 | down | XM_001067045 | LOC688460 | 688460 |
| 18.048967 | down | XM_001067048 | LOC688461 | 688461 |
| 60.967354 | down | XM_001067063 | LOC688464 | 688464 |
| 13.857585 | down | XM_001067095 | LOC688474 | 688474 |
| 52.924103 | down | XM_001056972 | LOC688479 | 688479 |
| 17.327042 | down | XM_001067114 | LOC688480 | 688480 |
| 39.157322 | down | XM_001067133 | LOC688487 | 688487 |
| 31.736286 | down | XM_001067146 | LOC688490 | 688490 |
| 6.5366564 | down | XM_001067220 | LOC688508 | 688508 |
| 69.553696 | down | XM_001067241 | LOC688519 | 688519 |
| 38.537598 | down | XM_001067313 | LOC688532 | 688532 |
| 80.8906   | down | XM_001067327 | LOC688538 | 688538 |
| 29.12666  | down | XM_001067374 | LOC688549 | 688549 |
| 23.25279  | down | XM_001067410 | LOC688558 | 688558 |
| 46.142178 | down | XM_001067419 | LOC688560 | 688560 |
| 13.066677 | down | XM_001067468 | LOC688570 | 688570 |
| 77.76228  | down | XM_001058486 | LOC688572 | 688572 |
| 3.0144775 | down | XM_001067487 | LOC688578 | 688578 |
| 8.275848  | down | XM_001067516 | LOC688585 | 688585 |
| 41.69992  | down | XM_001067519 | LOC688586 | 688586 |
| 87.587    | down | XM_001067520 | LOC688587 | 688587 |
| 38.552464 | down | XM_001067531 | LOC688592 | 688592 |
| 7.0865726 | down | XM_001067543 | LOC688595 | 688595 |
| 19.821527 | down | XM_001067545 | LOC688596 | 688596 |
| 30.433342 | down | XM_001067566 | LOC688603 | 688603 |
| 26.4782   | down | XM_001067598 | LOC688609 | 688609 |
| 29.366474 | down | XM_001067670 | LOC688625 | 688625 |
| 42.80296  | down | XM_001067700 | LOC688635 | 688635 |
| 74.05528  | down | XM_001067734 | LOC688644 | 688644 |
| 71.05983  | down | XM_001058542 | LOC688649 | 688649 |
| 37.31683  | down | XM_001067766 | LOC688653 | 688653 |
| 10.388799 | down | XM_001067791 | LOC688661 | 688661 |
| 70.06719  | down | XM_001067795 | LOC688663 | 688663 |
| 23.790619 | down | XM_001067801 | LOC688665 | 688665 |
| 43.19191  | down | XM_001067832 | LOC688670 | 688670 |
| 19.547953 | down | XM_001067851 | LOC688676 | 688676 |
| 31.932772 | down | XM_001067853 | LOC688678 | 688678 |
| 61.58795  | down | XM_001058650 | LOC688679 | 688679 |
| 49.274372 | down | XM_001058713 | LOC688687 | 688687 |
| 21.583681 | down | XM_001067922 | LOC688690 | 688690 |
| 27.919575 | down | XM_001068044 | LOC688720 | 688720 |
| 45.851093 | down | XM_001068087 | LOC688732 | 688732 |
| 14.258763 | down | XM_001068112 | LOC688741 | 688741 |



|           |      |              |           |        |
|-----------|------|--------------|-----------|--------|
| 32.079994 | down | XM_001068185 | LOC688758 | 688758 |
| 23.983267 | down | XM_001068207 | LOC688764 | 688764 |
| 6.2491193 | down | XM_001068253 | LOC688778 | 688778 |
| 10.42045  | down | XM_001068255 | LOC688779 | 688779 |
| 23.097885 | down | XM_001068261 | LOC688780 | 688780 |
| 27.392838 | down | XM_001068318 | LOC688793 | 688793 |
| 53.065243 | down | XM_001068328 | LOC688797 | 688797 |
| 23.657476 | down | XM_001068329 | LOC688798 | 688798 |
| 5.4748063 | down | XM_001068361 | LOC688801 | 688801 |
| 26.791508 | down | XM_001068371 | LOC688803 | 688803 |
| 61.638027 | down | XM_001068412 | LOC688816 | 688816 |
| 45.478794 | down | XM_001068419 | LOC688818 | 688818 |
| 31.928793 | down | XM_001068465 | LOC688825 | 688825 |
| 56.39267  | down | XM_001068481 | LOC688831 | 688831 |
| 6.118022  | down | XM_001068517 | LOC688838 | 688838 |
| 60.437565 | down | XM_001068610 | LOC688861 | 688861 |
| 39.78659  | down | XM_001068669 | LOC688874 | 688874 |
| 10.792433 | down | XM_001068681 | LOC688876 | 688876 |
| 38.05601  | down | XM_001068684 | LOC688878 | 688878 |
| 38.796944 | down | XM_001068707 | LOC688888 | 688888 |
| 48.16997  | down | XM_001068717 | LOC688892 | 688892 |
| 68.15046  | down | XM_001068783 | LOC688909 | 688909 |
| 7.398708  | down | XM_001068798 | LOC688910 | 688910 |
| 24.345709 | down | XM_001068828 | LOC688920 | 688920 |
| 49.0023   | down | XM_001068891 | LOC688935 | 688935 |
| 7.6756406 | down | XM_001068901 | LOC688939 | 688939 |
| 15.430796 | down | XM_001068909 | LOC688943 | 688943 |
| 34.333633 | down | XM_001068932 | LOC688946 | 688946 |
| 5.1082225 | down | XM_001068947 | LOC688950 | 688950 |
| 2.4503613 | down | XM_001068964 | LOC688954 | 688954 |
| 6.2713895 | down | XM_001068968 | LOC688956 | 688956 |
| 73.96106  | down | XM_001068988 | LOC688964 | 688964 |
| 61.274517 | down | XM_001069010 | LOC688970 | 688970 |
| 4.891471  | down | XM_001069014 | LOC688972 | 688972 |
| 9.752943  | down | XM_001069020 | LOC688974 | 688974 |
| 24.70151  | down | XM_001069078 | LOC688991 | 688991 |
| 39.191246 | down | XM_001069111 | LOC688997 | 688997 |
| 74.38186  | down | XM_001069134 | LOC689001 | 689001 |
| 95.20825  | down | XM_001069178 | LOC689016 | 689016 |
| 10.353164 | down | XM_001069210 | LOC689024 | 689024 |
| 44.216347 | down | XM_001069258 | LOC689032 | 689032 |
| 16.989187 | down | XM_001069291 | LOC689039 | 689039 |
| 12.066406 | down | XM_001069303 | LOC689042 | 689042 |
| 7.8912024 | down | XM_001069310 | LOC689044 | 689044 |

|            |      |              |           |        |
|------------|------|--------------|-----------|--------|
| 60.22297   | down | XM_001069354 | LOC689058 | 689058 |
| 42.52373   | down | XM_001069379 | LOC689066 | 689066 |
| 47.77147   | down | XM_001069422 | LOC689076 | 689076 |
| 2.8396075  | down | XM_001069425 | LOC689077 | 689077 |
| 29.919302  | down | XM_001069432 | LOC689080 | 689080 |
| 48.09105   | down | XM_001069448 | LOC689083 | 689083 |
| 55.55339   | down | XM_001058891 | LOC689084 | 689084 |
| 27.279474  | down | XM_001069469 | LOC689086 | 689086 |
| 59.21226   | down | XM_001069491 | LOC689091 | 689091 |
| 73.82856   | down | XM_001058953 | LOC689094 | 689094 |
| 11.813415  | down | XM_001069508 | LOC689096 | 689096 |
| 87.5874    | down | XM_001069556 | LOC689107 | 689107 |
| 3.120316   | down | XM_001058170 | LOC689117 | 689117 |
| 8.318963   | down | XM_001069594 | LOC689119 | 689119 |
| 20.270517  | down | XM_001069609 | LOC689122 | 689122 |
| 56.45022   | down | XM_001069621 | LOC689124 | 689124 |
| 7.6265583  | down | XM_001069645 | LOC689128 | 689128 |
| 14.618992  | down | XM_001069647 | LOC689129 | 689129 |
| 6.8342557  | down | XM_001069692 | LOC689136 | 689136 |
| 14.4876375 | down | XM_001069703 | LOC689138 | 689138 |
| 98.24171   | down | XM_001069756 | LOC689150 | 689150 |
| 4.070094   | down | XM_001069768 | LOC689154 | 689154 |
| 29.900648  | down | XM_001069824 | LOC689169 | 689169 |
| 31.928625  | down | XM_001069867 | LOC689177 | 689177 |
| 34.86194   | down | XM_001069895 | LOC689182 | 689182 |
| 54.860584  | down | XM_001069925 | LOC689190 | 689190 |
| 95.62068   | down | XM_001069934 | LOC689193 | 689193 |
| 68.96887   | down | XM_001069974 | LOC689206 | 689206 |
| 53.815147  | down | XM_001069993 | LOC689215 | 689215 |
| 6.876138   | down | XM_001070024 | LOC689220 | 689220 |
| 56.7401    | down | XM_001070040 | LOC689225 | 689225 |
| 50.679035  | down | XM_001070055 | LOC689228 | 689228 |
| 26.290424  | down | XM_001070064 | LOC689231 | 689231 |
| 3.32627    | down | XM_001070084 | LOC689236 | 689236 |
| 56.646202  | down | XM_001070094 | LOC689241 | 689241 |
| 30.47463   | down | XM_001070111 | LOC689244 | 689244 |
| 38.29132   | down | XM_001070112 | LOC689245 | 689245 |
| 4.42432    | down | XM_001070134 | LOC689254 | 689254 |
| 18.906582  | down | XM_001070169 | LOC689261 | 689261 |
| 30.972649  | down | XM_001070188 | LOC689268 | 689268 |
| 102.80043  | down | XM_001070205 | LOC689270 | 689270 |
| 3.8558226  | down | XM_001070234 | LOC689278 | 689278 |
| 58.16741   | down | XM_001070237 | LOC689281 | 689281 |
| 22.55988   | down | XM_001070260 | LOC689287 | 689287 |

|           |      |              |           |        |
|-----------|------|--------------|-----------|--------|
| 47.38658  | down | XM_001070335 | LOC689299 | 689299 |
| 52.3142   | down | XM_001070367 | LOC689312 | 689312 |
| 78.40627  | down | XM_001070376 | LOC689315 | 689315 |
| 2.1964989 | down | XM_001070400 | LOC689323 | 689323 |
| 53.866592 | down | XM_001070403 | LOC689326 | 689326 |
| 74.87943  | down | XM_001059417 | LOC689329 | 689329 |
| 7.2254763 | down | XM_001070420 | LOC689331 | 689331 |
| 4.2288837 | down | XM_001070424 | LOC689333 | 689333 |
| 71.9342   | down | XM_001070438 | LOC689338 | 689338 |
| 3.8651574 | down | XM_001070451 | LOC689341 | 689341 |
| 67.360176 | down | XM_001070459 | LOC689342 | 689342 |
| 13.528373 | down | XM_001070469 | LOC689346 | 689346 |
| 54.027836 | down | XM_001054976 | LOC689347 | 689347 |
| 4.9666085 | down | XM_001070510 | LOC689359 | 689359 |
| 71.570114 | down | XM_001070518 | LOC689362 | 689362 |
| 72.206894 | down | XM_001070539 | LOC689368 | 689368 |
| 18.669254 | down | XM_001070623 | LOC689390 | 689390 |
| 43.228683 | down | XM_001070630 | LOC689392 | 689392 |
| 74.06037  | down | XM_001070689 | LOC689410 | 689410 |
| 20.590792 | down | XM_001070715 | LOC689416 | 689416 |
| 65.938484 | down | XM_001070719 | LOC689417 | 689417 |
| 61.648502 | down | XM_001070729 | LOC689418 | 689418 |
| 6.2192583 | down | XM_001070743 | LOC689423 | 689423 |
| 5.5244865 | down | XM_001070770 | LOC689428 | 689428 |
| 44.41565  | down | XM_001070788 | LOC689435 | 689435 |
| 5.305113  | down | XM_001070789 | LOC689436 | 689436 |
| 4.47303   | down | XM_001070812 | LOC689444 | 689444 |
| 34.734253 | down | XM_001059655 | LOC689445 | 689445 |
| 10.431926 | down | XM_001070833 | LOC689447 | 689447 |
| 71.92005  | down | XM_001070864 | LOC689453 | 689453 |
| 6.2712693 | down | XM_001070885 | LOC689458 | 689458 |
| 24.39689  | down | XM_001070913 | LOC689465 | 689465 |
| 23.861471 | down | XM_001059762 | LOC689467 | 689467 |
| 50.55679  | down | XM_001070948 | LOC689478 | 689478 |
| 35.861298 | down | XM_001070949 | LOC689479 | 689479 |
| 3.2861443 | down | XM_001070970 | LOC689486 | 689486 |
| 2.4043906 | down | XM_001070976 | LOC689489 | 689489 |
| 51.704273 | down | XM_001070998 | LOC689497 | 689497 |
| 58.677612 | down | XM_001070999 | LOC689498 | 689498 |
| 47.09767  | down | XM_001060016 | LOC689501 | 689501 |
| 13.199415 | down | XM_001071008 | LOC689503 | 689503 |
| 49.57524  | down | XM_001071038 | LOC689511 | 689511 |
| 2.3186789 | down | XM_001071057 | LOC689518 | 689518 |
| 4.5842595 | down | XM_001071058 | LOC689519 | 689519 |

|           |      |              |           |        |
|-----------|------|--------------|-----------|--------|
| 15.704088 | down | XM_001071087 | LOC689528 | 689528 |
| 48.78306  | down | XM_001071141 | LOC689541 | 689541 |
| 64.112885 | down | XM_001060123 | LOC689545 | 689545 |
| 68.65691  | down | XM_001071174 | LOC689554 | 689554 |
| 33.876106 | down | XM_001071251 | LOC689579 | 689579 |
| 7.5421367 | down | XM_001071303 | LOC689596 | 689596 |
| 46.316826 | down | XM_001071362 | LOC689612 | 689612 |
| 4.0370483 | down | XM_001071429 | LOC689628 | 689628 |
| 2.0865488 | down | XM_001071446 | LOC689634 | 689634 |
| 53.562225 | down | XM_001071448 | LOC689635 | 689635 |
| 30.844889 | down | XM_001071465 | LOC689640 | 689640 |
| 12.092289 | down | XM_001071518 | LOC689651 | 689651 |
| 69.386375 | down | XM_001071539 | LOC689658 | 689658 |
| 35.94934  | down | XM_001071579 | LOC689664 | 689664 |
| 66.33951  | down | XM_001060225 | LOC689666 | 689666 |
| 69.45555  | down | XM_001055155 | LOC689667 | 689667 |
| 58.736694 | down | XM_001071623 | LOC689677 | 689677 |
| 61.156055 | down | XM_001071624 | LOC689678 | 689678 |
| 34.846306 | down | XM_001071625 | LOC689679 | 689679 |
| 45.612694 | down | XM_001060291 | LOC689680 | 689680 |
| 46.10504  | down | XM_001055277 | LOC689681 | 689681 |
| 21.263905 | down | XM_001071635 | LOC689682 | 689682 |
| 59.795033 | down | XM_001055335 | LOC689690 | 689690 |
| 32.47841  | down | XM_001071675 | LOC689692 | 689692 |
| 17.900272 | down | XM_001071752 | LOC689714 | 689714 |
| 3.6855838 | down | XM_001071764 | LOC689718 | 689718 |
| 22.022844 | down | XM_001071772 | LOC689720 | 689720 |
| 53.69142  | down | XM_001071797 | LOC689727 | 689727 |
| 25.56198  | down | XM_001071809 | LOC689730 | 689730 |
| 24.90057  | down | XM_001071817 | LOC689734 | 689734 |
| 56.84238  | down | XM_001071835 | LOC689740 | 689740 |
| 4.6379356 | down | XM_001071836 | LOC689741 | 689741 |
| 3.7515354 | down | XM_001071853 | LOC689743 | 689743 |
| 41.563877 | down | XM_001071871 | LOC689749 | 689749 |
| 83.073616 | down | XM_001071877 | LOC689750 | 689750 |
| 20.063984 | down | XM_001071886 | LOC689753 | 689753 |
| 2.6408432 | down | XM_001071896 | LOC689757 | 689757 |
| 38.169117 | down | XM_001071903 | LOC689759 | 689759 |
| 6.5767956 | down | XM_001071906 | LOC689761 | 689761 |
| 63.34113  | down | XM_001071912 | LOC689762 | 689762 |
| 61.399338 | down | XM_001071913 | LOC689763 | 689763 |
| 62.562984 | down | XM_001071936 | LOC689767 | 689767 |
| 35.642525 | down | XM_001071944 | LOC689769 | 689769 |
| 55.419296 | down | XM_001071950 | LOC689774 | 689774 |

|           |      |              |           |        |
|-----------|------|--------------|-----------|--------|
| 4.5307097 | down | XM_001071955 | LOC689776 | 689776 |
| 60.154854 | down | XM_001071983 | LOC689781 | 689781 |
| 4.1302876 | down | XM_001072007 | LOC689787 | 689787 |
| 22.871727 | down | XM_001072019 | LOC689791 | 689791 |
| 65.00725  | down | XM_001072032 | LOC689796 | 689796 |
| 69.99548  | down | XM_001070608 | LOC689797 | 689797 |
| 34.50156  | down | XM_001072049 | LOC689799 | 689799 |
| 43.643913 | down | XM_001072069 | LOC689802 | 689802 |
| 3.4743001 | down | XM_001072103 | LOC689811 | 689811 |
| 6.061954  | down | XM_001072162 | LOC689826 | 689826 |
| 90.54743  | down | XM_001072168 | LOC689827 | 689827 |
| 51.493618 | down | XM_001072188 | LOC689829 | 689829 |
| 47.794415 | down | XM_001072212 | LOC689837 | 689837 |
| 45.95997  | down | XM_001072245 | LOC689846 | 689846 |
| 69.14601  | down | XM_001072263 | LOC689850 | 689850 |
| 50.01259  | down | XM_001072288 | LOC689857 | 689857 |
| 61.261154 | down | XM_001072303 | LOC689861 | 689861 |
| 17.519491 | down | XM_001072316 | LOC689867 | 689867 |
| 60.393314 | down | XM_001060593 | LOC689870 | 689870 |
| 32.305515 | down | XM_001072332 | LOC689871 | 689871 |
| 79.507645 | down | XM_001072354 | LOC689878 | 689878 |
| 9.262281  | down | XM_001072387 | LOC689887 | 689887 |
| 11.132057 | down | XM_001072398 | LOC689889 | 689889 |
| 55.985287 | down | XM_001072467 | LOC689905 | 689905 |
| 32.807667 | down | XM_001072493 | LOC689913 | 689913 |
| 11.870276 | down | XM_001073448 | LOC689926 | 689926 |
| 29.075815 | down | XM_001069035 | LOC689927 | 689927 |
| 2.725153  | down | XM_001072611 | LOC689939 | 689939 |
| 81.2311   | down | XM_001072652 | LOC689948 | 689948 |
| 100.56399 | down | XM_001072684 | LOC689957 | 689957 |
| 39.431202 | down | XM_001072685 | LOC689958 | 689958 |
| 2.1264973 | down | XM_001072700 | LOC689962 | 689962 |
| 22.069115 | down | XM_001069365 | LOC689992 | 689992 |
| 6.4558587 | down | XM_001072851 | LOC689996 | 689996 |
| 76.59611  | down | XM_001072858 | LOC689999 | 689999 |
| 33.332264 | down | XM_001072899 | LOC690010 | 690010 |
| 52.823425 | down | XM_001072965 | LOC690024 | 690024 |
| 51.922054 | down | XM_001073001 | LOC690039 | 690039 |
| 3.0701487 | down | XM_001073002 | LOC690040 | 690040 |
| 39.797535 | down | XM_001060929 | LOC690042 | 690042 |
| 50.486305 | down | XM_001073030 | LOC690048 | 690048 |
| 63.048943 | down | XM_001073060 | LOC690054 | 690054 |
| 77.08811  | down | XM_001073094 | LOC690061 | 690061 |
| 22.941032 | down | XM_001073109 | LOC690062 | 690062 |

|           |      |              |           |        |
|-----------|------|--------------|-----------|--------|
| 9.110562  | down | XM_001073156 | LOC690075 | 690075 |
| 65.59103  | down | XM_001073178 | LOC690081 | 690081 |
| 29.312374 | down | XM_001073200 | LOC690086 | 690086 |
| 4.177639  | down | XM_001073272 | LOC690103 | 690103 |
| 60.43265  | down | XM_001073344 | LOC690122 | 690122 |
| 6.608111  | down | XM_001073355 | LOC690124 | 690124 |
| 5.950752  | down | XM_001073389 | LOC690130 | 690130 |
| 75.91696  | down | XM_001073403 | LOC690135 | 690135 |
| 5.384746  | down | XM_001073439 | LOC690142 | 690142 |
| 56.368576 | down | XM_001073445 | LOC690145 | 690145 |
| 2.3823717 | down | XM_001073454 | LOC690146 | 690146 |
| 14.980081 | down | XM_001073480 | LOC690152 | 690152 |
| 84.295166 | down | XM_001073536 | LOC690167 | 690167 |
| 36.300682 | down | XM_001073545 | LOC690170 | 690170 |
| 5.0815334 | down | XM_001073557 | LOC690175 | 690175 |
| 68.29658  | down | XM_001073570 | LOC690179 | 690179 |
| 12.807584 | down | XM_001073351 | LOC690190 | 690190 |
| 13.159766 | down | XM_001073728 | LOC690222 | 690222 |
| 60.99428  | down | XM_001073746 | LOC690228 | 690228 |
| 45.236366 | down | XM_001073844 | LOC690250 | 690250 |
| 11.418671 | down | XM_001073870 | LOC690256 | 690256 |
| 7.961515  | down | XM_001073924 | LOC690268 | 690268 |
| 31.929342 | down | XM_001073925 | LOC690269 | 690269 |
| 9.984599  | down | XM_001073928 | LOC690270 | 690270 |
| 2.0771432 | down | XM_001073940 | LOC690274 | 690274 |
| 6.8605156 | down | XM_001073943 | LOC690276 | 690276 |
| 16.301693 | down | XM_001073947 | LOC690279 | 690279 |
| 39.803192 | down | XM_001073950 | LOC690280 | 690280 |
| 56.849464 | down | XM_001073951 | LOC690281 | 690281 |
| 9.533491  | down | XM_001073960 | LOC690284 | 690284 |
| 34.268444 | down | XM_001073964 | LOC690286 | 690286 |
| 106.25849 | down | XM_001073967 | LOC690288 | 690288 |
| 45.510067 | down | XM_001074009 | LOC690298 | 690298 |
| 91.75664  | down | XM_001074152 | LOC690341 | 690341 |
| 2.7730932 | down | XM_001074160 | LOC690343 | 690343 |
| 15.843454 | down | XM_001074223 | LOC690358 | 690358 |
| 60.898296 | down | XM_001074232 | LOC690362 | 690362 |
| 26.076832 | down | XM_001074233 | LOC690363 | 690363 |
| 5.3599825 | down | XM_001074272 | LOC690375 | 690375 |
| 78.10928  | down | XM_001074284 | LOC690379 | 690379 |
| 93.617294 | down | XM_001074306 | LOC690389 | 690389 |
| 47.686047 | down | XM_001074324 | LOC690395 | 690395 |
| 32.675297 | down | XM_001074336 | LOC690398 | 690398 |
| 41.45548  | down | XM_001074345 | LOC690400 | 690400 |

|           |      |              |           |        |
|-----------|------|--------------|-----------|--------|
| 29.609497 | down | XM_001074375 | LOC690411 | 690411 |
| 3.4324386 | down | XM_001074383 | LOC690413 | 690413 |
| 46.909847 | down | XM_001074400 | LOC690415 | 690415 |
| 8.469469  | down | XM_001072906 | LOC690422 | 690422 |
| 2.1068673 | down | XM_001074425 | LOC690425 | 690425 |
| 53.562794 | down | XM_001074433 | LOC690429 | 690429 |
| 36.184643 | down | XM_001074447 | LOC690431 | 690431 |
| 94.892494 | down | XM_001074459 | LOC690439 | 690439 |
| 27.948122 | down | XM_001074463 | LOC690440 | 690440 |
| 36.11994  | down | XM_001074469 | LOC690443 | 690443 |
| 22.524773 | down | XM_001074472 | LOC690445 | 690445 |
| 46.92399  | down | XM_001074473 | LOC690446 | 690446 |
| 30.14306  | down | XM_001074476 | LOC690447 | 690447 |
| 25.981474 | down | XM_001074485 | LOC690452 | 690452 |
| 17.335434 | down | XM_001074496 | LOC690456 | 690456 |
| 60.571213 | down | XM_001074498 | LOC690457 | 690457 |
| 14.076051 | down | XM_001074502 | LOC690459 | 690459 |
| 16.643557 | down | XM_001074509 | LOC690463 | 690463 |
| 70.57289  | down | XM_001074527 | LOC690467 | 690467 |
| 41.883675 | down | XM_001074534 | LOC690469 | 690469 |
| 39.310677 | down | XM_001074545 | LOC690474 | 690474 |
| 9.484367  | down | XM_001074554 | LOC690476 | 690476 |
| 6.0076137 | down | XM_001074561 | LOC690479 | 690479 |
| 19.041714 | down | XM_001074567 | LOC690482 | 690482 |
| 46.084126 | down | XM_001074598 | LOC690490 | 690490 |
| 18.014143 | down | XM_001074661 | LOC690517 | 690517 |
| 78.66861  | down | XM_001074680 | LOC690523 | 690523 |
| 7.05655   | down | XM_001074689 | LOC690524 | 690524 |
| 59.04349  | down | XM_001074751 | LOC690542 | 690542 |
| 5.074503  | down | XM_001074816 | LOC690562 | 690562 |
| 82.36319  | down | XM_001074825 | LOC690565 | 690565 |
| 13.188784 | down | XM_001074841 | LOC690570 | 690570 |
| 38.515606 | down | XM_001074851 | LOC690576 | 690576 |
| 60.709225 | down | XM_001074852 | LOC690577 | 690577 |
| 47.09269  | down | XM_001074868 | LOC690582 | 690582 |
| 51.943596 | down | XM_001074893 | LOC690590 | 690590 |
| 8.653634  | down | XM_001074983 | LOC690618 | 690618 |
| 54.71622  | down | XM_001074985 | LOC690619 | 690619 |
| 55.510864 | down | XM_001075002 | LOC690624 | 690624 |
| 45.776123 | down | XM_001075006 | LOC690626 | 690626 |
| 23.509018 | down | XM_001075019 | LOC690629 | 690629 |
| 39.459476 | down | XM_001075028 | LOC690631 | 690631 |
| 58.965015 | down | XM_001075069 | LOC690643 | 690643 |
| 4.318817  | down | XM_001075079 | LOC690647 | 690647 |

|           |      |              |           |        |
|-----------|------|--------------|-----------|--------|
| 85.93601  | down | XM_001075121 | LOC690659 | 690659 |
| 5.4325027 | down | XM_001075132 | LOC690662 | 690662 |
| 32.423172 | down | XM_001062005 | LOC690665 | 690665 |
| 43.2316   | down | XM_001075149 | LOC690667 | 690667 |
| 41.409504 | down | XM_001075162 | LOC690672 | 690672 |
| 13.380032 | down | XM_001075204 | LOC690684 | 690684 |
| 4.9970126 | down | XM_001075254 | LOC690694 | 690694 |
| 42.56233  | down | XM_001075284 | LOC690700 | 690700 |
| 15.12907  | down | XM_001075303 | LOC690707 | 690707 |
| 3.159078  | down | XM_001075349 | LOC690717 | 690717 |
| 10.823107 | down | XM_001075359 | LOC690719 | 690719 |
| 57.9827   | down | XM_001075363 | LOC690721 | 690721 |
| 45.99255  | down | XM_001075438 | LOC690739 | 690739 |
| 36.282738 | down | XM_001075453 | LOC690741 | 690741 |
| 6.598037  | down | XM_001075478 | LOC690744 | 690744 |
| 60.634247 | down | XM_001075495 | LOC690748 | 690748 |
| 5.8673716 | down | XM_001075530 | LOC690761 | 690761 |
| 63.35939  | down | XM_001075604 | LOC690782 | 690782 |
| 51.18491  | down | XM_001075660 | LOC690798 | 690798 |
| 9.872211  | down | XM_001075714 | LOC690811 | 690811 |
| 51.949673 | down | XM_001075725 | LOC690815 | 690815 |
| 69.61183  | down | XM_001075749 | LOC690822 | 690822 |
| 49.965847 | down | XM_001075795 | LOC690828 | 690828 |
| 35.58312  | down | XM_001075885 | LOC690854 | 690854 |
| 67.78772  | down | XM_001075892 | LOC690855 | 690855 |
| 36.393307 | down | XM_001075910 | LOC690860 | 690860 |
| 2.2146409 | down | XM_001075927 | LOC690864 | 690864 |
| 79.00221  | down | XM_001075937 | LOC690867 | 690867 |
| 2.0562112 | down | XM_001075950 | LOC690871 | 690871 |
| 81.406235 | down | XM_001075967 | LOC690874 | 690874 |
| 5.3230686 | down | XM_001076026 | LOC690885 | 690885 |
| 20.723368 | down | XM_001076036 | LOC690889 | 690889 |
| 66.34819  | down | XM_001076048 | LOC690892 | 690892 |
| 57.23547  | down | XM_001076066 | LOC690896 | 690896 |
| 36.398132 | down | XM_001076113 | LOC690910 | 690910 |
| 55.471836 | down | XM_001076169 | LOC690924 | 690924 |
| 12.816829 | down | XM_001076181 | LOC690927 | 690927 |
| 64.67827  | down | XM_001076188 | LOC690929 | 690929 |
| 30.360683 | down | XM_001078193 | LOC690930 | 690930 |
| 2.9913085 | down | XM_001076204 | LOC690934 | 690934 |
| 59.582264 | down | XM_001076213 | LOC690937 | 690937 |
| 30.525276 | down | XM_001076239 | LOC690943 | 690943 |
| 70.83947  | down | XM_001076268 | LOC690947 | 690947 |
| 13.400257 | down | XM_001076286 | LOC690951 | 690951 |



|           |      |              |           |        |
|-----------|------|--------------|-----------|--------|
| 59.49424  | down | XM_001076337 | LOC690969 | 690969 |
| 7.8700547 | down | XM_001076357 | LOC690974 | 690974 |
| 75.481285 | down | XM_001076377 | LOC690977 | 690977 |
| 16.725073 | down | XM_001076398 | LOC690985 | 690985 |
| 54.046158 | down | XM_001076453 | LOC690998 | 690998 |
| 7.860008  | down | XM_001071458 | LOC691000 | 691000 |
| 29.201902 | down | XM_001076475 | LOC691005 | 691005 |
| 5.699181  | down | XM_001076490 | LOC691008 | 691008 |
| 6.343252  | down | XM_001076494 | LOC691009 | 691009 |
| 4.594149  | down | XM_001076557 | LOC691021 | 691021 |
| 37.899372 | down | XM_001076573 | LOC691025 | 691025 |
| 4.4744363 | down | XM_001076600 | LOC691033 | 691033 |
| 52.800243 | down | XM_001076744 | LOC691070 | 691070 |
| 25.159592 | down | XM_001076750 | LOC691073 | 691073 |
| 23.476376 | down | XM_001076760 | LOC691077 | 691077 |
| 33.346348 | down | XM_001076823 | LOC691094 | 691094 |
| 72.13982  | down | XM_001076856 | LOC691108 | 691108 |
| 23.166252 | down | XM_001076859 | LOC691109 | 691109 |
| 3.7605805 | down | XM_001076883 | LOC691114 | 691114 |
| 52.85701  | down | XM_001076889 | LOC691115 | 691115 |
| 35.185905 | down | XM_001076891 | LOC691117 | 691117 |
| 5.884287  | down | XM_001076892 | LOC691118 | 691118 |
| 8.768778  | down | XM_001076905 | LOC691125 | 691125 |
| 45.35032  | down | XM_001076960 | LOC691136 | 691136 |
| 7.7251887 | down | XM_001076975 | LOC691141 | 691141 |
| 7.290775  | down | XM_001076976 | LOC691142 | 691142 |
| 32.291126 | down | XM_001076998 | LOC691146 | 691146 |
| 44.526638 | down | XM_001077145 | LOC691188 | 691188 |
| 10.3089   | down | XM_001077165 | LOC691192 | 691192 |
| 83.6373   | down | XM_001077250 | LOC691219 | 691219 |
| 24.927282 | down | XM_001077260 | LOC691221 | 691221 |
| 3.7167044 | down | XM_001077271 | LOC691224 | 691224 |
| 2.5010834 | down | XM_001077272 | LOC691225 | 691225 |
| 22.88434  | down | XM_001077347 | LOC691241 | 691241 |
| 16.194223 | down | XM_001077373 | LOC691247 | 691247 |
| 68.71651  | down | XM_001077436 | LOC691262 | 691262 |
| 45.318104 | down | XM_001077468 | LOC691270 | 691270 |
| 33.06413  | down | XM_001077501 | LOC691274 | 691274 |
| 36.85168  | down | XM_001077529 | LOC691282 | 691282 |
| 21.204136 | down | XM_001077753 | LOC691331 | 691331 |
| 26.71564  | down | XM_001077757 | LOC691332 | 691332 |
| 23.630014 | down | XM_001077758 | LOC691333 | 691333 |
| 61.43072  | down | XM_001077759 | LOC691334 | 691334 |
| 43.019363 | down | XM_001077840 | LOC691353 | 691353 |

|           |      |              |           |        |
|-----------|------|--------------|-----------|--------|
| 5.4830275 | down | XM_001077864 | LOC691358 | 691358 |
| 23.630625 | down | XM_001077906 | LOC691366 | 691366 |
| 2.0751593 | down | XM_001077980 | LOC691381 | 691381 |
| 24.619114 | down | XM_001077994 | LOC691383 | 691383 |
| 63.993656 | down | XM_001078062 | LOC691395 | 691395 |
| 53.12758  | down | XM_001078077 | LOC691401 | 691401 |
| 49.29711  | down | XM_001078092 | LOC691403 | 691403 |
| 59.67002  | down | XM_001078110 | LOC691406 | 691406 |
| 60.420288 | down | XM_001078125 | LOC691410 | 691410 |
| 61.78119  | down | XM_001078150 | LOC691414 | 691414 |
| 11.251637 | down | XM_001068693 | LOC691418 | 691418 |
| 4.8848987 | down | XM_001078185 | LOC691421 | 691421 |
| 2.1227236 | down | XM_001078268 | LOC691439 | 691439 |
| 23.744083 | down | XM_001078288 | LOC691443 | 691443 |
| 53.818295 | down | XM_001078322 | LOC691451 | 691451 |
| 36.99558  | down | XM_001078439 | LOC691473 | 691473 |
| 35.54924  | down | XM_001078495 | LOC691487 | 691487 |
| 4.1092987 | down | XM_001078547 | LOC691499 | 691499 |
| 38.021133 | down | XM_001078554 | LOC691502 | 691502 |
| 6.969195  | down | XM_001078628 | LOC691519 | 691519 |
| 35.91053  | down | XM_001078640 | LOC691522 | 691522 |
| 87.18262  | down | XM_001078740 | LOC691539 | 691539 |
| 26.033316 | down | XM_001078835 | LOC691561 | 691561 |
| 56.386166 | down | XM_001078865 | LOC691569 | 691569 |
| 14.442444 | down | XM_001078893 | LOC691573 | 691573 |
| 64.28848  | down | XM_001078898 | LOC691575 | 691575 |
| 70.643555 | down | XM_001078899 | LOC691576 | 691576 |
| 51.261486 | down | XM_001078931 | LOC691586 | 691586 |
| 30.684412 | down | XM_001078957 | LOC691594 | 691594 |
| 59.706417 | down | XM_001078958 | LOC691595 | 691595 |
| 6.1078267 | down | XM_001078967 | LOC691596 | 691596 |
| 38.981792 | down | XM_001078980 | LOC691600 | 691600 |
| 57.613567 | down | XM_001078992 | LOC691605 | 691605 |
| 11.783403 | down | XM_001079023 | LOC691612 | 691612 |
| 8.974823  | down | XM_001079034 | LOC691615 | 691615 |
| 29.751987 | down | XM_001079035 | LOC691616 | 691616 |
| 4.47654   | down | XM_001079045 | LOC691619 | 691619 |
| 45.541847 | down | XM_001079070 | LOC691627 | 691627 |
| 51.481007 | down | XM_001079096 | LOC691633 | 691633 |
| 4.60462   | down | XM_001079135 | LOC691642 | 691642 |
| 12.845527 | down | XM_001079143 | LOC691646 | 691646 |
| 2.1262844 | down | XM_001079159 | LOC691653 | 691653 |
| 2.9235134 | down | XM_001079177 | LOC691660 | 691660 |
| 23.512321 | down | XM_001079199 | LOC691666 | 691666 |

|           |      |              |           |        |
|-----------|------|--------------|-----------|--------|
| 34.847424 | down | XM_001079224 | LOC691672 | 691672 |
| 54.491943 | down | XM_001079225 | LOC691673 | 691673 |
| 4.2270813 | down | XM_001079245 | LOC691679 | 691679 |
| 70.669174 | down | XM_001079247 | LOC691681 | 691681 |
| 9.396431  | down | XM_001079259 | LOC691684 | 691684 |
| 73.355225 | down | XM_001079285 | LOC691692 | 691692 |
| 71.283325 | down | XM_001079331 | LOC691705 | 691705 |
| 15.693861 | down | XM_001079351 | LOC691712 | 691712 |
| 44.032154 | down | XM_001079400 | LOC691728 | 691728 |
| 56.572483 | down | XM_001079430 | LOC691735 | 691735 |
| 63.767822 | down | XM_001079476 | LOC691744 | 691744 |
| 36.5234   | down | XM_001079486 | LOC691748 | 691748 |
| 58.43748  | down | XM_001079519 | LOC691754 | 691754 |
| 70.76428  | down | XM_001079538 | LOC691760 | 691760 |
| 68.28949  | down | XM_001079592 | LOC691773 | 691773 |
| 2.253587  | down | XM_001079602 | LOC691777 | 691777 |
| 82.76729  | down | XM_001079611 | LOC691780 | 691780 |
| 69.08682  | down | XM_001079621 | LOC691784 | 691784 |
| 83.396484 | down | XM_001079655 | LOC691793 | 691793 |
| 43.337265 | down | XM_001079664 | LOC691795 | 691795 |
| 79.68269  | down | XM_001079666 | LOC691796 | 691796 |
| 9.585123  | down | XM_001079667 | LOC691797 | 691797 |
| 65.42204  | down | XM_001079679 | LOC691800 | 691800 |
| 72.45451  | down | XM_001079688 | LOC691802 | 691802 |
| 3.3715205 | down | XM_001079726 | LOC691809 | 691809 |
| 34.23636  | down | XM_001079748 | LOC691818 | 691818 |
| 20.827887 | down | XM_001079793 | LOC691833 | 691833 |
| 47.51803  | down | XM_001079807 | LOC691838 | 691838 |
| 2.4097273 | down | XM_001079808 | LOC691839 | 691839 |
| 18.092453 | down | XM_001079876 | LOC691854 | 691854 |
| 2.809453  | down | XM_001079928 | LOC691872 | 691872 |
| 57.41471  | down | XM_001079964 | LOC691883 | 691883 |
| 2.0404181 | down | XM_001080046 | LOC691904 | 691904 |
| 2.1381824 | down | XM_001080055 | LOC691906 | 691906 |
| 34.319633 | down | XM_001080938 | LOC692003 | 692003 |
| 30.748688 | down | XM_001080954 | LOC692006 | 692006 |
| 6.229728  | down | XM_001081234 | LOC692026 | 692026 |
| 14.722045 | down | XM_001081377 | LOC692042 | 692042 |
| 26.46031  | down | XM_001081410 | LOC692050 | 692050 |
| 44.66004  | down | NM_023969    | Lpar3     | 66025  |
| 4.0432563 | down | XM_001055334 | Lpin2     | 316737 |
| 32.997707 | down | XM_001070693 | Lrfn4     | 688721 |
| 2.6263492 | down | NM_139331    | Lrit1     | 246214 |
| 3.5104558 | down | XM_231214    | Lrp1b     | 311926 |

|           |      |              |          |        |
|-----------|------|--------------|----------|--------|
| 3.170277  | down | XM_001067386 | Lrp5     | 293649 |
| 4.2827444 | down | XM_001066578 | Lrp8     | 362558 |
| 3.2989945 | down | XM_001070748 | Lrrc16a  | 306941 |
| 6.031827  | down | XM_001070537 | Lrrc25   | 498605 |
| 9.597979  | down | XM_001056018 | Lrrc27   | 499281 |
| 3.7323048 | down | NM_001024995 | Lrrc33   | 303875 |
| 2.6841311 | down | NM_001004201 | Lrrc46   | 287653 |
| 2.1527662 | down | XM_342990    | Lrrc47   | 362672 |
| 3.407298  | down | XM_001073479 | Lrrc49   | 300763 |
| 2.906591  | down | NM_001077434 | Lrrc52   | 289199 |
| 5.427192  | down | XM_001070170 | Lrrc55   | 311171 |
| 6.039981  | down | XM_001075896 | Lrrc68   | 308398 |
| 6.075941  | down | XM_001055887 | Lrrc69   | 500415 |
| 8.838449  | down | NM_001014269 | Lrrfip1  | 367314 |
| 3.3820095 | down | NM_001024307 | Lrriq3   | 499732 |
| 22.825962 | down | NM_022634    | Lst1     | 64569  |
| 2.4534311 | down | NM_212507    | Ltb      | 361795 |
| 8.296159  | down | NM_053640    | Ltb4r2   | 114098 |
| 6.417817  | down | NM_153726    | Ly49s3   | 266768 |
| 3.8834832 | down | NM_001009494 | Ly49s7   | 494203 |
| 20.22765  | down | XM_001068565 | Ly49si2  | 494207 |
| 2.7200787 | down | NM_001001969 | Ly6g6c   | 294241 |
| 13.607564 | down | NM_001001970 | Ly6g6d   | 415062 |
| 5.9729137 | down | NM_001007677 | Lyl1     | 304663 |
| 29.795622 | down | XM_001053512 | Lypd6    | 679564 |
| 8.359736  | down | NM_031342    | Lypla2   | 83510  |
| 8.867958  | down | XM_217189    | Lysmd2   | 300839 |
| 32.240692 | down | XM_001078029 | Lyzl4    | 363168 |
| 35.38889  | down | NM_001014247 | Lzts2    | 365468 |
| 9.547706  | down | XM_001061025 | Mad2l1   | 297176 |
| 3.2358937 | down | NM_017190    | Mag      | 29409  |
| 14.357118 | down | NM_001014182 | Mall     | 362211 |
| 5.6015406 | down | XM_576071    | Map3k9   | 500690 |
| 3.1104002 | down | XM_001071701 | Map4k2   | 293694 |
| 3.4108315 | down | XM_214968    | Map7     | 293016 |
| 3.5150697 | down | XM_341399    | Mapk8    | 116554 |
| 6.2471967 | down | XM_001080877 | Mapkbp1  | 362197 |
| 12.514434 | down | NM_030862    | Marcks11 | 81520  |
| 3.0561066 | down | NM_053947    | Mark1    | 117016 |
| 7.8157635 | down | XM_001057742 | Mark4    | 680407 |
| 5.502951  | down | XM_001055222 | Marveld1 | 309375 |
| 5.0564394 | down | XM_345145    | Marveld2 | 365657 |
| 7.5161986 | down | NM_022210    | Max      | 60661  |
| 3.4017055 | down | XM_001074311 | Mbd3l2   | 690392 |

|           |      |              |           |        |
|-----------|------|--------------|-----------|--------|
| 2.1557026 | down | XM_001055890 | Mbd6      | 362892 |
| 2.179505  | down | NM_001024996 | Mblac1    | 304346 |
| 5.847035  | down | NM_001025291 | Mbp       | 24547  |
| 8.001954  | down | NM_013099    | Mc4r      | 25635  |
| 4.533139  | down | XM_229172    | Mcf2      | 317598 |
| 2.2931247 | down | XM_001068436 | Mcm4      | 29728  |
| 2.8328946 | down | XM_226316    | Mcm5      | 291885 |
| 21.791693 | down | XM_001058060 | Mcpt112   | 408238 |
| 11.386038 | down | XM_573785    | Mcpt113   | 408209 |
| 5.4947343 | down | XM_573784    | Mcpt114   | 408239 |
| 5.735345  | down | NM_019321    | Mcpt4     | 54270  |
| 6.2785344 | down | NM_021598    | Mcpt8     | 29269  |
| 2.2921593 | down | XM_573782    | Mcpt8l2   | 408240 |
| 2.6488986 | down | NM_019323    | Mcpt9     | 54272  |
| 3.1351993 | down | XM_001054964 | Mctp1     | 309928 |
| 2.1919465 | down | NM_001044237 | Mcts1     | 302500 |
| 8.034596  | down | NM_030859    | Mdk       | 81517  |
| 12.574654 | down | XM_341880    | Me3       | 361602 |
| 5.197479  | down | NM_001047115 | Mect1     | 684527 |
| 2.8948483 | down | XM_001069345 | Med19     | 311165 |
| 2.0202715 | down | XM_001059017 | Med28     | 305391 |
| 7.155323  | down | NM_031634    | Mefv      | 58923  |
| 5.4075146 | down | XM_001077460 | Mei1      | 315162 |
| 2.5235405 | down | XM_001055664 | Meig1     | 679834 |
| 3.499409  | down | NM_001009962 | Metrn     | 287151 |
| 2.2521274 | down | XM_001074994 | Mettl11b  | 289167 |
| 27.796404 | down | XM_001060093 | Mettl8    | 502633 |
| 2.7630832 | down | XM_001068105 | Mex3b     | 308790 |
| 2.0651255 | down | XM_001062342 | Mex3c     | 307271 |
| 2.0480537 | down | XM_001076492 | Mex3d     | 299613 |
| 22.360043 | down | XM_001060365 | Mfsd7     | 305625 |
| 4.7274547 | down | XM_001059451 | Mfsd9     | 316356 |
| 3.8546414 | down | NM_019239    | Mgat3     | 29582  |
| 4.864619  | down | NM_001044300 | MGC112715 | 690899 |
| 4.5682716 | down | NM_001024893 | MGC114427 | 317297 |
| 7.854323  | down | NM_001024909 | MGC114464 | 500925 |
| 4.7481155 | down | NM_001024895 | MGC114492 | 317324 |
| 34.140636 | down | NM_001025755 | MGC116197 | 367620 |
| 3.479783  | down | NM_001044281 | MGC93861  | 682010 |
| 2.313706  | down | NM_001007645 | MGC95152  | 297109 |
| 3.018324  | down | NM_030852    | Mia       | 81510  |
| 3.8310487 | down | XM_001076784 | Midn      | 314623 |
| 2.2539222 | down | XM_001074414 | Mier2     | 362841 |
| 3.8645608 | down | XM_001056221 | Mki67     | 291234 |

|           |      |              |         |        |
|-----------|------|--------------|---------|--------|
| 4.4437003 | down | XM_001057262 | Mkrm3   | 292988 |
| 6.8396497 | down | XM_001056158 | Mllt1   | 301119 |
| 8.64005   | down | XM_001079320 | Mlxip   | 304479 |
| 4.144559  | down | NM_001037217 | Mmd2    | 304301 |
| 3.9238944 | down | NM_001013967 | Mmgt2   | 303211 |
| 5.659312  | down | NM_080776    | Mmp16   | 65205  |
| 4.0149035 | down | XM_001072313 | Mmp1b   | 300338 |
| 2.5774508 | down | NM_031054    | Mmp2    | 81686  |
| 11.781693 | down | NM_031757    | Mmp24   | 83513  |
| 2.1626241 | down | XM_001059491 | Mmrn2   | 306288 |
| 3.239179  | down | XM_001072054 | Mnd1    | 295160 |
| 6.8971767 | down | XM_001080632 | Mnt     | 287521 |
| 48.97693  | down | XM_001077777 | Mobp    | 25037  |
| 4.9920454 | down | XM_001056788 | Mocos   | 361300 |
| 10.397816 | down | XM_001062730 | Morn2   | 500606 |
| 7.898843  | down | XM_001068860 | Mov10   | 310756 |
| 4.5440974 | down | XM_001077024 | Mpn2    | 287358 |
| 4.9639454 | down | XM_001081487 | Mpp2    | 85275  |
| 4.5286646 | down | XM_001077948 | Mpped1  | 362971 |
| 14.026122 | down | NM_001037642 | Mptx    | 289243 |
| 2.082786  | down | XM_001070218 | Mpv17l2 | 290645 |
| 2.5303257 | down | NM_203470    | Mrgprg  | 309133 |
| 2.3597064 | down | XM_001081102 | Mrm1    | 363661 |
| 9.095984  | down | XM_001054992 | Mrpl32  | 291206 |
| 3.828479  | down | XM_001075218 | Ms4a1   | 309217 |
| 11.82182  | down | XM_001075502 | Ms4a11  | 361735 |
| 6.6323705 | down | NM_024352    | Mst1    | 24566  |
| 3.1401222 | down | XM_001070192 | Mst4    | 317589 |
| 2.832362  | down | XM_001062660 | Mt4     | 498911 |
| 6.090808  | down | XM_001056154 | Mthfd2  | 680308 |
| 3.6531768 | down | XM_001058546 | Mtmr15  | 309256 |
| 6.2810917 | down | XM_001064860 | Mtss1   | 362918 |
| 22.749544 | down | XM_001063115 | Muc6    | 282586 |
| 16.131128 | down | NM_001002826 | Mug2    | 408236 |
| 6.028449  | down | NM_203325    | Mup5    | 298107 |
| 7.025984  | down | NM_133316    | Mutyh   | 170841 |
| 8.210325  | down | NM_031062    | Mvd     | 81726  |
| 23.345438 | down | XM_342716    | Mxd1    | 362391 |
| 5.059559  | down | XM_001074923 | Mxra7   | 690599 |
| 31.748907 | down | NM_001013096 | Mycn    | 298894 |
| 16.3899   | down | XM_001064527 | Myh15   | 303965 |
| 3.2789793 | down | NM_017239    | Myh6    | 29556  |
| 2.3204646 | down | XM_001065619 | Myl6b   | 685883 |
| 5.4573236 | down | XM_001079144 | Myo1f   | 314654 |

|           |      |              |         |        |
|-----------|------|--------------|---------|--------|
| 5.7231236 | down | XM_001053631 | Myo3a   | 498806 |
| 7.1127553 | down | XM_001058020 | Mysm1   | 298247 |
| 6.2055545 | down | XM_213675    | N6amt1  | 288309 |
| 2.2863724 | down | XM_001069804 | Nacad   | 289786 |
| 8.04616   | down | NM_001024789 | Nap1l2  | 317247 |
| 9.791512  | down | XM_001072040 | Nat14   | 361500 |
| 9.706375  | down | XM_001055639 | Ncaph   | 680089 |
| 2.0732782 | down | NM_053734    | Ncf1    | 114553 |
| 8.280826  | down | XM_001066310 | Ncf2    | 364018 |
| 2.4034896 | down | NM_031822    | Ncoa2   | 83724  |
| 3.9462192 | down | XM_001058653 | Ncoa7   | 498995 |
| 4.597035  | down | NM_198783    | Ndufaf4 | 362495 |
| 6.034013  | down | NM_022302    | Necab1  | 64169  |
| 5.278409  | down | NM_199096    | Necap2  | 298598 |
| 2.8999805 | down | NM_031783    | Nefl    | 83613  |
| 22.285177 | down | NM_017029    | Nefm    | 24588  |
| 3.5057588 | down | XM_001072927 | Nek11   | 315978 |
| 3.418913  | down | XM_001055166 | Nek2    | 114482 |
| 7.532752  | down | XM_001080757 | Nek8    | 287473 |
| 7.744982  | down | NM_057190    | Nelf    | 117536 |
| 9.513484  | down | NM_054010    | Neu3    | 117185 |
| 2.6788435 | down | XM_001069279 | Neurl   | 309459 |
| 3.9271693 | down | NM_053909    | Nfasc   | 116690 |
| 6.14865   | down | XM_001072834 | Nfatc2  | 311658 |
| 6.3411474 | down | XM_001062534 | Nfkbiz  | 304005 |
| 3.140116  | down | XM_001064398 | Nfx1    | 313166 |
| 2.1277094 | down | NM_031553    | Nfyb    | 25336  |
| 20.916132 | down | NM_012610    | Ngfr    | 24596  |
| 4.03198   | down | XM_001077752 | Nhedc2  | 365946 |
| 2.2028677 | down | XM_001070369 | Nhsl2   | 317253 |
| 2.8003852 | down | NM_021595    | Ninj2   | 59115  |
| 6.7066956 | down | XM_001054918 | Nipa1   | 308668 |
| 3.1094205 | down | XM_233308    | Nkrf    | 298316 |
| 15.649263 | down | XM_001056222 | Nkx2-3  | 309389 |
| 3.0778236 | down | NM_022239    | Nmu     | 63887  |
| 7.148584  | down | XM_001066533 | Nnmt    | 300691 |
| 9.34008   | down | XM_001068034 | Nol6    | 313167 |
| 2.0595224 | down | XM_001060437 | Nol7    | 498727 |
| 2.6617675 | down | XM_240636    | Nono1   | 306912 |
| 7.098425  | down | NM_012611    | Nos2    | 24599  |
| 6.540032  | down | NM_001002827 | Notch4  | 406162 |
| 2.9057543 | down | NM_053683    | Nox1    | 114243 |
| 2.0220826 | down | XM_001077267 | Noxa1   | 311793 |
| 5.3632717 | down | NM_153293    | Npb     | 259222 |

|           |      |              |                 |        |
|-----------|------|--------------|-----------------|--------|
| 5.090219  | down | NM_001004231 | Npdc1           | 296562 |
| 5.942974  | down | NM_022586    | Npff            | 60337  |
| 2.1319845 | down | NM_012612    | Nppa            | 24602  |
| 2.2299125 | down | NM_053750    | Nppc            | 114593 |
| 3.5727162 | down | NM_030841    | Nptxr           | 81005  |
| 4.6726403 | down | NM_023952    | Npvf            | 60570  |
| 2.1178966 | down | NM_022941    | Nr1i3           | 65035  |
| 8.882359  | down | NM_031130    | Nr2f1           | 81808  |
| 3.0644684 | down | NM_019328    | Nr4a2           | 54278  |
| 6.578611  | down | NM_178096    | Nrep            | 338475 |
| 14.358019 | down | XM_001063076 | Nrg2            | 432361 |
| 44.821434 | down | NM_201418    | Ns5atp9         | 300795 |
| 3.032383  | down | XM_001058107 | Nsbp1_predicted | 365273 |
| 4.442925  | down | NM_024128    | Nsg1            | 25247  |
| 12.288395 | down | NM_001007617 | Nuak2           | 289419 |
| 11.843052 | down | XM_001056321 | Nudt11          | 680248 |
| 4.6374454 | down | XM_001063939 | Nudt13          | 682978 |
| 10.848962 | down | XM_001072855 | Nudt16          | 363129 |
| 2.028462  | down | XM_001061438 | Nup98           | 81738  |
| 2.0701797 | down | NM_053611    | Nupr1           | 113900 |
| 3.0628047 | down | XM_001055001 | Nxph2           | 679932 |
| 2.4575198 | down | NM_001009493 | Oas3            | 494202 |
| 10.521086 | down | XM_218245    | Obox2           | 292574 |
| 10.061436 | down | XM_001073855 | Obox6           | 292629 |
| 3.30411   | down | NM_001033958 | Obp3            | 259247 |
| 2.2060997 | down | NM_031329    | Ocln            | 83497  |
| 3.8640757 | down | NM_024126    | Odf1            | 24610  |
| 4.018731  | down | XM_001077384 | Odf3l2          | 299600 |
| 11.682218 | down | NM_001007670 | Odf4            | 303236 |
| 10.296021 | down | XM_001080849 | Oip5            | 499873 |
| 2.2653391 | down | NM_053573    | Olfm1           | 93667  |
| 6.380356  | down | NM_001013192 | Olfml1          | 361621 |
| 26.194511 | down | NM_001000077 | Olr1000         | 288891 |
| 5.2013435 | down | NM_001001371 | Olr1002         | 288881 |
| 6.2929773 | down | NM_001000070 | Olr1016         | 288858 |
| 3.7397015 | down | NM_001000149 | Olr108          | 293247 |
| 2.852506  | down | NM_001000709 | Olr1084         | 404958 |
| 3.850191  | down | XM_234873    | Olr1088         | 299582 |
| 34.582493 | down | NM_001001379 | Olr1090         | 299553 |
| 26.968447 | down | NM_001001380 | Olr1092         | 299570 |
| 27.239723 | down | NM_001001388 | Olr1093         | 366844 |
| 11.302276 | down | NM_001000416 | Olr1095         | 299576 |
| 2.4902768 | down | NM_001000743 | Olr110          | 405007 |
| 5.0335655 | down | NM_001000424 | Olr1107         | 300202 |



|           |      |              |         |        |
|-----------|------|--------------|---------|--------|
| 6.217832  | down | NM_001000869 | Olr1163 | 405166 |
| 7.0649843 | down | NM_001000594 | Olr1193 | 367032 |
| 44.941307 | down | NM_001000438 | Olr1214 | 300538 |
| 4.5216036 | down | NM_001000442 | Olr1226 | 300551 |
| 4.7892838 | down | NM_001000813 | Olr1231 | 405099 |
| 5.2224593 | down | NM_001000446 | Olr1234 | 300558 |
| 7.54174   | down | NM_001000447 | Olr1235 | 300560 |
| 4.67142   | down | NM_001000807 | Olr1247 | 405093 |
| 17.076181 | down | NM_173300    | Olr1271 | 286959 |
| 4.8689923 | down | NM_001000460 | Olr1293 | 300599 |
| 2.838081  | down | NM_001000598 | Olr1295 | 367065 |
| 42.935184 | down | NM_001000471 | Olr1320 | 300621 |
| 28.715971 | down | NM_001000476 | Olr1330 | 300630 |
| 18.459726 | down | NM_001000480 | Olr1337 | 300637 |
| 47.15089  | down | NM_001001121 | Olr1347 | 406024 |
| 7.5632777 | down | NM_001000493 | Olr1356 | 302954 |
| 12.587814 | down | NM_001000858 | Olr1364 | 405150 |
| 15.550094 | down | NM_214828    | Olr1378 | 287086 |
| 8.651469  | down | NM_214833    | Olr1385 | 287236 |
| 38.337124 | down | NM_001000788 | Olr1388 | 405066 |
| 21.04149  | down | NM_001000161 | Olr139  | 293278 |
| 5.075781  | down | NM_001001089 | Olr1391 | 405983 |
| 78.14939  | down | NM_001001091 | Olr1394 | 405985 |
| 19.783892 | down | NM_001001092 | Olr1395 | 405986 |
| 19.71244  | down | NM_001001095 | Olr1399 | 405990 |
| 7.9897656 | down | NM_001000162 | Olr140  | 293279 |
| 12.226789 | down | NM_001001096 | Olr1400 | 405991 |
| 17.948668 | down | NM_001000003 | Olr1401 | 287247 |
| 2.7149303 | down | NM_001000784 | Olr1410 | 405062 |
| 2.1245646 | down | NM_001000008 | Olr1418 | 287313 |
| 29.22779  | down | NM_001000007 | Olr1422 | 287310 |
| 20.251244 | down | NM_001000779 | Olr1424 | 405056 |
| 13.490339 | down | NM_001000010 | Olr1425 | 287316 |
| 8.1715    | down | NM_001000011 | Olr1428 | 287318 |
| 24.200699 | down | NM_001000016 | Olr1439 | 287328 |
| 29.595545 | down | NM_001000774 | Olr1450 | 405049 |
| 55.049885 | down | NM_001000957 | Olr1451 | 405306 |
| 47.95111  | down | NM_001000772 | Olr1453 | 405047 |
| 59.85625  | down | NM_001000771 | Olr1455 | 405046 |
| 6.048687  | down | NM_001000770 | Olr1459 | 405045 |
| 7.1467223 | down | NM_001000944 | Olr1472 | 405286 |
| 29.402283 | down | NM_001000527 | Olr1481 | 363639 |
| 5.9359736 | down | NM_001000719 | Olr1488 | 404971 |
| 15.969616 | down | NM_001000718 | Olr1490 | 404970 |

|           |      |              |         |        |
|-----------|------|--------------|---------|--------|
| 6.925745  | down | NM_001000528 | Olr1509 | 363642 |
| 7.300809  | down | NM_001000036 | Olr1514 | 287514 |
| 12.41223  | down | NM_001001098 | Olr1515 | 405994 |
| 45.895306 | down | NM_001000038 | Olr1516 | 287520 |
| 8.785128  | down | NM_001000039 | Olr1521 | 287613 |
| 2.8680081 | down | NM_001000547 | Olr154  | 365333 |
| 3.8902767 | down | NM_001001105 | Olr1545 | 406001 |
| 3.481496  | down | NM_001000044 | Olr1566 | 287973 |
| 14.639068 | down | NM_001000043 | Olr1567 | 287970 |
| 28.619844 | down | NM_001000042 | Olr1569 | 287969 |
| 2.4950273 | down | XM_001072702 | Olr1572 | 288490 |
| 3.6514602 | down | NM_001000084 | Olr1592 | 289254 |
| 9.341271  | down | NM_001000502 | Olr1606 | 305711 |
| 3.827247  | down | NM_001000534 | Olr1607 | 364275 |
| 10.615909 | down | NM_001000101 | Olr1644 | 290055 |
| 2.8416383 | down | NM_001000172 | Olr165  | 293312 |
| 4.368802  | down | NM_001001007 | Olr1664 | 405375 |
| 7.133879  | down | NM_001000267 | Olr1668 | 294140 |
| 4.032165  | down | NM_001000891 | Olr1680 | 405192 |
| 3.7697225 | down | NM_001000270 | Olr1684 | 294151 |
| 12.335599 | down | NM_001001373 | Olr1686 | 294152 |
| 6.5970187 | down | NM_001000274 | Olr1690 | 294162 |
| 2.3744366 | down | NM_001000272 | Olr1695 | 294159 |
| 3.8883882 | down | NM_001001111 | Olr1697 | 406010 |
| 13.516739 | down | NM_001001112 | Olr1699 | 406011 |
| 21.10054  | down | NM_001000271 | Olr1704 | 294155 |
| 8.263615  | down | NM_001000887 | Olr1705 | 405188 |
| 22.24594  | down | NM_001001115 | Olr1707 | 406014 |
| 11.352087 | down | NM_001000276 | Olr1708 | 294166 |
| 15.534661 | down | NM_001000886 | Olr1710 | 405186 |
| 32.405903 | down | NM_214460    | Olr1718 | 405205 |
| 20.889286 | down | NM_001001116 | Olr1720 | 406015 |
| 14.846115 | down | NM_001001117 | Olr1722 | 406016 |
| 7.142195  | down | NM_001001428 | Olr1748 | 405199 |
| 11.625212 | down | NM_001000489 | Olr1765 | 302821 |
| 18.535606 | down | NM_001000181 | Olr183  | 293328 |
| 2.6462069 | down | NM_001001031 | Olr186  | 405917 |
| 19.529459 | down | NM_001000538 | Olr11   | 365170 |
| 3.1661525 | down | NM_001000194 | Olr208  | 293355 |
| 4.164333  | down | NM_001000199 | Olr217  | 293364 |
| 22.903816 | down | NM_001000552 | Olr220  | 365341 |
| 5.7903495 | down | NM_001000200 | Olr221  | 293367 |
| 6.255267  | down | NM_001000211 | Olr239  | 293383 |
| 5.794699  | down | NM_001000226 | Olr279  | 293429 |

|           |      |              |        |        |
|-----------|------|--------------|--------|--------|
| 7.1540747 | down | NM_001000233 | Olr295 | 293595 |
| 47.39451  | down | NM_001001039 | Olr304 | 405925 |
| 19.975225 | down | NM_001000240 | Olr305 | 293603 |
| 3.240359  | down | NM_001000955 | Olr308 | 405304 |
| 5.1219826 | down | NM_001000764 | Olr312 | 405038 |
| 22.799376 | down | NM_001000247 | Olr325 | 293763 |
| 25.751652 | down | NM_001000248 | Olr326 | 293764 |
| 7.771758  | down | NM_001000250 | Olr332 | 293769 |
| 10.622918 | down | NM_001000689 | Olr34  | 404894 |
| 13.164186 | down | NM_001000260 | Olr376 | 293809 |
| 28.666424 | down | NM_001001286 | Olr378 | 405366 |
| 2.979711  | down | NM_001000914 | Olr392 | 405227 |
| 5.0539417 | down | NM_001000559 | Olr395 | 366024 |
| 2.3326173 | down | NM_001000111 | Olr4   | 292560 |
| 5.4720583 | down | NM_001001014 | Olr402 | 405388 |
| 3.7374625 | down | NM_001000382 | Olr404 | 296667 |
| 7.709469  | down | NM_001000391 | Olr423 | 296685 |
| 8.773262  | down | NM_001000393 | Olr425 | 296687 |
| 10.573541 | down | XM_001072921 | Olr437 | 502758 |
| 41.617474 | down | NM_001000282 | Olr440 | 295711 |
| 2.1064467 | down | NM_001001050 | Olr446 | 405937 |
| 10.82622  | down | NM_001000298 | Olr466 | 295736 |
| 29.359922 | down | NM_001001125 | Olr471 | 406046 |
| 2.0543778 | down | NM_001000304 | Olr477 | 295747 |
| 4.077801  | down | NM_001000305 | Olr479 | 295748 |
| 4.228673  | down | NM_001000561 | Olr482 | 366099 |
| 2.399478  | down | NM_001000674 | Olr529 | 404877 |
| 9.885054  | down | NM_001001051 | Olr531 | 405939 |
| 4.5540347 | down | NM_001000565 | Olr541 | 366104 |
| 3.6836207 | down | NM_001000322 | Olr550 | 295795 |
| 4.7667437 | down | NM_001000748 | Olr60  | 405017 |
| 3.4667673 | down | NM_001001022 | Olr61  | 405906 |
| 2.480171  | down | NM_001000640 | Olr649 | 404833 |
| 17.065022 | down | NM_001000638 | Olr652 | 404831 |
| 5.6662946 | down | NM_001000925 | Olr661 | 405243 |
| 4.8645334 | down | NM_001001060 | Olr662 | 405948 |
| 4.9182963 | down | NM_001001279 | Olr67  | 365324 |
| 15.146868 | down | NM_001001064 | Olr697 | 405952 |
| 3.2620354 | down | NM_001000768 | Olr7   | 405043 |
| 2.430229  | down | NM_001001065 | Olr707 | 405953 |
| 3.7186642 | down | NM_001000360 | Olr713 | 295907 |
| 5.4902997 | down | NM_001000620 | Olr726 | 404812 |
| 3.576153  | down | NM_001000619 | Olr727 | 404811 |
| 2.3004646 | down | NM_001000618 | Olr733 | 404810 |

|           |      |              |         |        |
|-----------|------|--------------|---------|--------|
| 13.385167 | down | NM_001000134 | Olr74   | 293218 |
| 6.9101443 | down | NM_001000575 | Olr741  | 366120 |
| 3.4093866 | down | NM_001000577 | Olr744  | 366122 |
| 2.3737156 | down | NM_001000615 | Olr749  | 404804 |
| 16.386234 | down | XM_001080296 | Olr763  | 296016 |
| 2.5303323 | down | XM_001080310 | Olr765  | 499860 |
| 18.053871 | down | NM_001000917 | Olr779  | 405232 |
| 6.541452  | down | NM_001000604 | Olr784  | 404793 |
| 3.6530972 | down | NM_001000113 | Olr8    | 292563 |
| 23.446629 | down | NM_001000853 | Olr803  | 405143 |
| 2.3562772 | down | NM_001000976 | Olr806  | 405331 |
| 3.3652248 | down | NM_001000851 | Olr807  | 405141 |
| 14.8159   | down | NM_001000850 | Olr808  | 405140 |
| 5.60217   | down | NM_001000846 | Olr813  | 405136 |
| 4.441015  | down | NM_001000843 | Olr819  | 405132 |
| 7.8784976 | down | NM_001000974 | Olr820  | 405329 |
| 22.335098 | down | NM_001000904 | Olr825  | 405214 |
| 4.2647486 | down | NM_001000903 | Olr826  | 405213 |
| 17.980494 | down | NM_001000901 | Olr829  | 405211 |
| 70.25865  | down | NM_001000414 | Olr840  | 298733 |
| 8.345334  | down | NM_001000585 | Olr859  | 366458 |
| 31.15422  | down | NM_001000410 | Olr865  | 298474 |
| 14.588429 | down | NM_001000821 | Olr868  | 405110 |
| 16.968374 | down | NM_001000708 | Olr876  | 404957 |
| 17.96841  | down | NM_001000055 | Olr880  | 288790 |
| 14.650229 | down | NM_001001358 | Olr883  | 288803 |
| 6.981686  | down | NM_001000745 | Olr89   | 405012 |
| 26.317287 | down | NM_001001354 | Olr917  | 288795 |
| 6.569083  | down | NM_001000588 | Olr927  | 366799 |
| 4.9880724 | down | NM_001001024 | Olr95   | 405909 |
| 4.4375887 | down | NM_001000487 | Olr962  | 302045 |
| 2.5508068 | down | NM_001001073 | Olr964  | 405963 |
| 3.2873838 | down | XM_001075549 | Opa3    | 308409 |
| 2.9446223 | down | XM_001068634 | Ophn1   | 312108 |
| 5.0530195 | down | NM_053904    | Oplah   | 116684 |
| 2.5166354 | down | XM_001081327 | Osbpl7  | 303497 |
| 22.28867  | down | XM_001076555 | Ostbeta | 300790 |
| 9.324993  | down | NM_013078    | Otc     | 25611  |
| 6.8959436 | down | XM_001053452 | Otor    | 366206 |
| 3.1753423 | down | XM_001071098 | Otud3   | 500572 |
| 59.92183  | down | XM_344878    | Ovol3   | 365226 |
| 6.033452  | down | NM_012996    | Oxt     | 25504  |
| 6.67529   | down | NM_057124    | P2ry6   | 117264 |
| 3.339777  | down | XM_001066817 | P4ha3   | 361612 |

|           |      |              |           |        |
|-----------|------|--------------|-----------|--------|
| 12.220164 | down | XM_001070732 | Pabpc11   | 296351 |
| 28.4569   | down | XM_001054954 | Pabpc112b | 302405 |
| 12.652932 | down | XM_001069283 | Pabpc2    | 291615 |
| 14.253769 | down | NM_001077677 | Pacrg     | 499021 |
| 2.1999106 | down | NM_017230    | Padi3     | 29520  |
| 9.006503  | down | NM_017227    | Padi4     | 29512  |
| 3.9393933 | down | NM_053654    | Pafah1b3  | 114113 |
| 2.226316  | down | XM_001073872 | Pak4      | 292756 |
| 16.64341  | down | XM_001055668 | Pald      | 294508 |
| 2.936134  | down | XM_001071590 | Pamr1     | 311252 |
| 2.4831288 | down | XM_001080007 | Pank1     | 294088 |
| 22.426128 | down | XM_001069675 | Papola    | 314417 |
| 2.8959854 | down | XM_215701    | Papss1    | 295443 |
| 4.446474  | down | NM_001003654 | Pard6a    | 307799 |
| 6.7981467 | down | XM_001058462 | Pate4     | 363041 |
| 2.3731909 | down | NM_033485    | Pawr      | 64513  |
| 5.9741836 | down | XM_230663    | Pax1      | 311505 |
| 22.453587 | down | NM_013001    | Pax6      | 25509  |
| 2.9925733 | down | XM_001072018 | Pbp2      | 246145 |
| 2.7421346 | down | XM_001078717 | Pbx3      | 311876 |
| 2.305115  | down | XM_001071111 | Pcbp4     | 363133 |
| 22.586628 | down | XM_225997    | Pcdh1     | 307481 |
| 7.2150474 | down | XM_001075929 | Pcdh15    | 690865 |
| 7.7654443 | down | XM_001053200 | Pcdh18    | 295027 |
| 2.474787  | down | XM_001073680 | Pcdh9     | 306091 |
| 59.294476 | down | NM_199503    | Pcdha1    | 393085 |
| 7.202784  | down | NM_053934    | Pcdha13   | 116742 |
| 36.784195 | down | NM_053941    | Pcdha3    | 116780 |
| 2.7711096 | down | NM_053933    | Pcdha4    | 116741 |
| 2.8015406 | down | NM_199507    | Pcdha7    | 393089 |
| 3.472972  | down | NM_053942    | Pcdha8    | 116781 |
| 4.7311187 | down | NM_199508    | Pcdha9    | 393090 |
| 2.8324132 | down | XM_001055294 | Pcdhb7    | 291652 |
| 4.3299155 | down | XM_001055350 | Pcdhb8    | 680020 |
| 5.8107195 | down | XM_001055473 | Pcdhb9    | 680047 |
| 2.7704694 | down | NM_001037154 | Pcdhga3   | 498847 |
| 8.287633  | down | XM_001057332 | Pcdhgb6   | 680470 |
| 2.0874474 | down | NM_012746    | Pcsk2     | 25121  |
| 3.7013707 | down | XM_001078022 | Pcsk5     | 116548 |
| 18.070192 | down | NM_199253    | Pcsk9     | 298296 |
| 2.1234815 | down | XM_001059896 | Pctk3     | 289019 |
| 2.6824584 | down | NM_017229    | Pde3b     | 29516  |
| 39.32133  | down | NM_053688    | Pde6h     | 114248 |
| 3.0616813 | down | NM_080894    | Pde7b     | 140929 |

|            |      |              |          |        |
|------------|------|--------------|----------|--------|
| 2.5254345  | down | XM_001064592 | Pdgfrl   | 290771 |
| 9.431591   | down | NM_053994    | Pdha2    | 117098 |
| 3.8961494  | down | NM_001007622 | Pdlim2   | 290354 |
| 3.7662404  | down | NM_173125    | Pdlim7   | 286908 |
| 9.58353    | down | NM_022852    | Pdx1     | 29535  |
| 3.9760985  | down | NM_022940    | Pdzd2    | 65034  |
| 2.7008858  | down | XM_001057829 | Pdzd7    | 293996 |
| 12.038482  | down | NM_130401    | Pdzk1ip1 | 81916  |
| 8.904531   | down | XM_218737    | Peg12    | 308692 |
| 6.2150297  | down | XM_001060915 | Peli1    | 305549 |
| 11.94627   | down | NM_017139    | Penk     | 29237  |
| 2.1581643  | down | NM_001033964 | Pfkfb2   | 24640  |
| 5.3251343  | down | NM_001025272 | Pgam5    | 288731 |
| 2.5957355  | down | NM_031640    | Pgcp     | 58952  |
| 2.046237   | down | NM_053373    | Pglyrp1  | 84387  |
| 14.627596  | down | XM_001057607 | Pglyrp3  | 499658 |
| 13.851005  | down | XM_001057786 | Pglyrp3b | 295180 |
| 2.4219863  | down | XM_001076262 | Phf13    | 313742 |
| 6.4624     | down | NM_031620    | Phgdh    | 58835  |
| 4.2446404  | down | XM_001053345 | Phka2    | 678739 |
| 8.1470995  | down | XM_001076710 | Phldb3   | 308431 |
| 2.1614215  | down | NM_139093    | Phrf1    | 245925 |
| 3.2643003  | down | NM_001012076 | Phyhipl  | 309901 |
| 7.5605035  | down | XM_001078697 | Pi16     | 294312 |
| 3.5001006  | down | NM_001044253 | Pif1     | 367645 |
| 6.638211   | down | XM_001055659 | Pign     | 309051 |
| 2.7746398  | down | XM_001069442 | Pigo     | 313341 |
| 6.88273    | down | NM_053923    | Pik3c2g  | 116720 |
| 2.6052332  | down | XM_001070149 | Pik3r4   | 363131 |
| 3.2385356  | down | XM_213732    | Pilra    | 288568 |
| 2.0454986  | down | XM_001077069 | Pin1     | 298696 |
| 9.432854   | down | NM_001033970 | Pip5k1c  | 314641 |
| 2.1407812  | down | XM_001081613 | Pitpnc1  | 498015 |
| 2.755407   | down | XM_001080102 | Pitpnm3  | 287467 |
| 27.25614   | down | NM_019247    | Pitx3    | 29609  |
| 24.82071   | down | NM_001076553 | Pkib     | 24678  |
| 11.3629055 | down | XM_001063502 | Pkp1     | 304822 |
| 3.5740001  | down | XM_213560    | Pkp2     | 287925 |
| 2.0092282  | down | XM_001071062 | Pla2g2e  | 298581 |
| 2.4126983  | down | XM_001080878 | Pla2g4b  | 311341 |
| 18.119612  | down | XM_001080057 | Pla2g4f  | 691907 |
| 2.737015   | down | NM_001005560 | Pla2g6   | 360426 |
| 12.9686775 | down | NM_001024894 | Plac1    | 317316 |
| 2.3503146  | down | XM_001067597 | Plac8    | 360914 |

|            |      |              |          |        |
|------------|------|--------------|----------|--------|
| 2.4471757  | down | NM_012760    | Plagl1   | 25157  |
| 13.57903   | down | NM_033350    | Plcb3    | 29322  |
| 18.604471  | down | XM_001080726 | Plcxd1   | 304575 |
| 33.927887  | down | XM_001077240 | Pld6     | 287366 |
| 8.488635   | down | XM_001060716 | Plekha6  | 360842 |
| 7.277137   | down | XM_001078528 | Plekha7  | 499249 |
| 6.306791   | down | NM_172033    | Plekhb1  | 64471  |
| 4.643866   | down | XM_217372    | Plekhb2  | 301337 |
| 4.9833136  | down | NM_001013148 | Plekhf1  | 308543 |
| 2.5367658  | down | XM_001061544 | Plin5    | 501283 |
| 4.6595926  | down | NM_017100    | Plk1     | 25515  |
| 3.3765645  | down | XM_001064185 | Pnmal2   | 308393 |
| 2.4686265  | down | XM_001081395 | Pnmt     | 24661  |
| 3.7082758  | down | NM_013007    | Pnoc     | 25516  |
| 17.640524  | down | XM_001062157 | Pof1b    | 302328 |
| 6.0813518  | down | XM_001066743 | Polh     | 316235 |
| 2.138142   | down | XM_001069113 | Poli     | 291526 |
| 2.0042644  | down | NM_001011912 | Polm     | 289757 |
| 4.3958197  | down | XM_001054408 | Polr3f   | 311487 |
| 2.4130254  | down | NM_053622    | Pom121   | 113975 |
| 2.2330413  | down | XM_001063037 | Porcn    | 317368 |
| 2.7486234  | down | XM_001075635 | Pou2f1   | 171068 |
| 6.320027   | down | XM_001059708 | Pou2f3   | 116544 |
| 32.375816  | down | NM_138838    | Pou3f1   | 192110 |
| 7.596729   | down | XM_001076964 | Pou4f1   | 114503 |
| 3.8846295  | down | XM_001069878 | Pou4f3   | 364855 |
| 2.080026   | down | NM_001081751 | Pou5f2   | 680620 |
| 5.868182   | down | XM_001055787 | Pou6f2   | 681092 |
| 3.1260018  | down | XM_219376    | Ppapdc1a | 309014 |
| 4.538859   | down | NM_013196    | Ppara    | 25747  |
| 3.6066928  | down | NM_198773    | Ppm1e    | 360593 |
| 10.9198065 | down | NM_175755    | Ppm1f    | 287931 |
| 6.9651375  | down | NM_022951    | Ppp1r10  | 65045  |
| 5.695155   | down | XM_001081393 | Ppp1r1b  | 360616 |
| 23.560825  | down | XM_001067607 | Ppp1r1c  | 499818 |
| 5.760769   | down | NM_053473    | Ppp1r9a  | 84685  |
| 7.9745193  | down | NM_053474    | Ppp1r9b  | 84686  |
| 2.8283496  | down | NM_057116    | Ppp2r2c  | 117256 |
| 2.648988   | down | NM_181379    | Ppp2r5b  | 309179 |
| 4.4033175  | down | NM_012626    | Ppy      | 24677  |
| 3.2419155  | down | XM_001058767 | Praf2    | 367743 |
| 2.8620205  | down | XM_001073706 | Pramef8  | 502994 |
| 5.7759123  | down | NM_031669    | Prap1    | 60574  |
| 49.070972  | down | NM_172065    | Prb1     | 257651 |

|           |      |              |          |        |
|-----------|------|--------------|----------|--------|
| 5.7704053 | down | XM_001072014 | Prdm5    | 689788 |
| 3.289785  | down | XM_001062048 | Prdm8    | 305198 |
| 5.098102  | down | XM_001073957 | Prickle2 | 312563 |
| 2.6343675 | down | NM_001044271 | Prl2c1   | 502122 |
| 10.329463 | down | NM_001083940 | Prl3d2   | 691552 |
| 2.2972157 | down | NM_012630    | Prlr     | 24684  |
| 7.2502575 | down | NM_012873    | Prm2     | 25345  |
| 3.4422045 | down | XM_001081220 | Prnd     | 113910 |
| 3.5020516 | down | NM_138851    | Prok1    | 192205 |
| 3.8127537 | down | NM_001037541 | Prok2    | 192206 |
| 25.589918 | down | NM_133513    | Proll1   | 65182  |
| 18.991482 | down | NM_153627    | Prop1    | 266738 |
| 3.3484735 | down | NM_031086    | Pros1    | 81750  |
| 3.1156158 | down | NM_001013211 | Prp2     | 362450 |
| 10.151052 | down | XM_001081954 | Prp2l2   | 685766 |
| 2.6919193 | down | NM_172064    | Prpg1    | 257652 |
| 3.3180492 | down | NM_012634    | Prps2    | 24689  |
| 2.1743994 | down | XM_001057092 | Prr16    | 361327 |
| 2.0368948 | down | XM_001069759 | Prr18    | 361481 |
| 4.1486883 | down | XM_001059223 | Prrg1    | 363472 |
| 14.520605 | down | NM_012635    | Prss1    | 24691  |
| 6.821976  | down | NM_012729    | Prss2    | 25052  |
| 2.8235133 | down | NM_181477    | Prss21   | 353251 |
| 2.1315222 | down | NM_182949    | Prss27   | 287108 |
| 12.082708 | down | NM_173127    | Prss3    | 286911 |
| 2.7724516 | down | XM_001056587 | Prss32   | 302970 |
| 18.41963  | down | XM_001056464 | Prss33   | 497873 |
| 3.4671662 | down | XM_001070589 | Prss37   | 362346 |
| 2.104812  | down | NM_001037651 | Prtg     | 315806 |
| 2.970147  | down | NM_023976    | Prx      | 78960  |
| 7.46312   | down | XM_001070777 | Psd3     | 306380 |
| 7.9907193 | down | XM_001053201 | Psd4     | 311785 |
| 15.170155 | down | XM_001076864 | Psx1     | 296535 |
| 4.718217  | down | NM_022516    | Ptbp1    | 29497  |
| 2.866434  | down | NM_021583    | Ptges    | 59103  |
| 4.535218  | down | NM_017043    | Ptgs1    | 24693  |
| 2.0660143 | down | NM_017044    | Pth      | 24694  |
| 5.1014633 | down | NM_020073    | Pth1r    | 56813  |
| 21.464485 | down | NM_012636    | Pthlh    | 24695  |
| 4.2418413 | down | XM_217346    | Ptk7     | 301242 |
| 3.6147985 | down | NM_017066    | Ptn      | 24924  |
| 3.4012816 | down | XM_213610    | Ptplb    | 288058 |
| 3.8493576 | down | NM_019253    | Ptpn5    | 29644  |
| 8.777158  | down | NM_053908    | Ptpn6    | 116689 |



|           |      |              |           |        |
|-----------|------|--------------|-----------|--------|
| 5.7518516 | down | NM_001024289 | Ptprcap   | 499300 |
| 2.1514957 | down | XM_001056164 | Ptpre     | 114767 |
| 5.395697  | down | NM_053881    | Ptprn     | 116660 |
| 7.988881  | down | XM_342568    | Ptprt     | 362263 |
| 5.8229413 | down | XM_001078427 | Ptrh1     | 362113 |
| 3.583722  | down | XM_001081808 | Pycr1     | 287877 |
| 3.8234184 | down | XM_001079880 | Pygo1     | 691857 |
| 3.2256417 | down | XM_001073224 | Pygo2     | 295251 |
| 2.7420022 | down | NM_001004234 | Pyroxd1   | 297708 |
| 4.0223446 | down | NM_001004261 | Pyroxd2   | 309381 |
| 27.186008 | down | NM_198200    | Qrfp      | 379044 |
| 2.35342   | down | XM_577148    | Qrich2    | 501747 |
| 5.499126  | down | XM_001080932 | Rab11fip4 | 303337 |
| 4.508273  | down | NM_198749    | Rab15     | 299156 |
| 2.2561731 | down | NM_001015012 | Rab30     | 308821 |
| 2.1778595 | down | XM_001054246 | Rab33b    | 365793 |
| 3.2186224 | down | XM_001072166 | Rab39     | 315668 |
| 3.4658966 | down | NM_080580    | Rab3d     | 140665 |
| 3.7959797 | down | NM_001024331 | Rab43     | 500249 |
| 11.188545 | down | NM_001024871 | Rabepk    | 296649 |
| 4.2705836 | down | XM_001061761 | Rabl3     | 360720 |
| 4.32581   | down | NM_001011902 | Rabl5     | 288585 |
| 3.854416  | down | XM_576058    | Rad5111   | 500679 |
| 4.6251354 | down | XM_001080997 | Rad5113   | 303375 |
| 3.152398  | down | NM_001037218 | Radil     | 304299 |
| 29.7983   | down | NM_001013063 | Raet11    | 292461 |
| 2.4684412 | down | NM_031093    | Rala      | 81757  |
| 3.9518383 | down | NM_032067    | Ralbp1    | 84014  |
| 14.095321 | down | NM_020100    | Ramp3     | 56820  |
| 7.539689  | down | XM_001078472 | Rap1gds1  | 310909 |
| 3.6528146 | down | NM_053741    | Rap2a     | 114560 |
| 2.484939  | down | NM_031528    | Rara      | 24705  |
| 5.53658   | down | XM_001059459 | Rarb      | 24706  |
| 2.5173442 | down | XM_001065154 | Rasgrp3   | 313874 |
| 5.3467813 | down | XM_001081057 | Rasl10b   | 303382 |
| 2.0657945 | down | NM_022959    | Rassf9    | 65053  |
| 3.679165  | down | XM_001053414 | Rbm12b    | 313069 |
| 3.576633  | down | XM_222200    | Rbm19     | 304512 |
| 4.614622  | down | XM_001069277 | Rbmx2     | 367930 |
| 4.1249423 | down | XM_001053717 | Rbpj      | 679028 |
| 15.954881 | down | XM_001076681 | Rbpms2    | 503214 |
| 6.349102  | down | XM_001066157 | Rccd1     | 308760 |
| 15.348485 | down | XM_001073225 | Rcn1      | 362182 |
| 10.56829  | down | NM_001008694 | Rcn3      | 494125 |

|           |      |              |            |        |
|-----------|------|--------------|------------|--------|
| 7.934746  | down | NM_001013994 | Rcor2      | 305811 |
| 27.501417 | down | XM_341147    | Rcsd1      | 360872 |
| 5.0580173 | down | NM_133543    | Rdh7       | 360420 |
| 3.8204246 | down | XM_215383    | Reep3      | 294375 |
| 2.5777626 | down | NM_001013218 | Reep6      | 362835 |
| 30.766945 | down | NM_173097    | Reg3g      | 24620  |
| 26.320063 | down | NM_001025753 | Rem1       | 366232 |
| 4.794569  | down | NM_012642    | Ren        | 24715  |
| 5.547248  | down | NM_031095    | Renbp      | 81759  |
| 7.037423  | down | XM_001075300 | Rep15      | 500366 |
| 5.6264935 | down | XM_001080107 | Rfc5       | 304528 |
| 3.507196  | down | NM_001014106 | Rfk        | 499328 |
| 2.422531  | down | XM_001072525 | Rfpl4a     | 292583 |
| 8.612277  | down | XM_001055742 | Rfx2       | 301121 |
| 17.877066 | down | XM_001064554 | RGD1304595 | 298104 |
| 2.2460823 | down | XM_001079093 | RGD1304624 | 314128 |
| 2.9440978 | down | XM_001075066 | RGD1304745 | 300381 |
| 3.1506963 | down | NM_001014059 | RGD1304952 | 312711 |
| 5.5491147 | down | XM_342916    | RGD1305090 | 362598 |
| 5.1905227 | down | NM_001014267 | RGD1305207 | 366990 |
| 6.621113  | down | XM_001073162 | RGD1305222 | 290686 |
| 10.070771 | down | NM_001009659 | RGD1305225 | 297458 |
| 4.0285764 | down | XM_001066987 | RGD1305274 | 298377 |
| 6.7902937 | down | NM_001009430 | RGD1305457 | 314730 |
| 5.2841063 | down | NM_001025011 | RGD1305464 | 315702 |
| 2.2593317 | down | XM_001066163 | RGD1305469 | 305466 |
| 8.466673  | down | XM_217663    | RGD1305500 | 308004 |
| 6.192475  | down | XM_001063925 | RGD1305560 | 301561 |
| 2.038791  | down | NM_001024749 | RGD1305713 | 293059 |
| 2.146931  | down | XM_001057760 | RGD1306119 | 314306 |
| 4.659745  | down | XM_001080995 | RGD1306282 | 314858 |
| 2.0994315 | down | XM_001073356 | RGD1306484 | 363594 |
| 2.0962615 | down | XM_001069342 | RGD1306526 | 310764 |
| 2.4179287 | down | XM_001073260 | RGD1306565 | 365057 |
| 2.9188154 | down | XM_001068867 | RGD1306576 | 298002 |
| 2.8235383 | down | XM_001053501 | RGD1306613 | 306994 |
| 11.364814 | down | XM_001078017 | RGD1306636 | 293498 |
| 5.375272  | down | XM_215709    | RGD1306704 | 295483 |
| 4.56712   | down | NM_001044226 | RGD1306772 | 288683 |
| 5.3250375 | down | XM_001080215 | RGD1306928 | 293509 |
| 6.016991  | down | XM_001069247 | RGD1306995 | 288094 |
| 5.3413677 | down | XM_001073278 | RGD1307220 | 315980 |
| 3.0488777 | down | XM_001065607 | RGD1307225 | 310269 |
| 8.877293  | down | XM_001081575 | RGD1307288 | 287761 |

|            |      |              |            |        |
|------------|------|--------------|------------|--------|
| 3.9949622  | down | XM_001075843 | RGD1307357 | 291975 |
| 6.176463   | down | XM_001054857 | RGD1307365 | 300880 |
| 4.878087   | down | XM_001070349 | RGD1307443 | 361244 |
| 2.2318997  | down | XM_215189    | RGD1307603 | 293656 |
| 11.297961  | down | XM_222746    | RGD1307830 | 304863 |
| 33.622562  | down | XM_342009    | RGD1308106 | 361719 |
| 29.701212  | down | XM_001062423 | RGD1308112 | 289038 |
| 2.0487964  | down | XM_001081031 | RGD1308261 | 299818 |
| 4.16959    | down | XM_237548    | RGD1308319 | 316764 |
| 3.071924   | down | XM_226525    | RGD1308461 | 307901 |
| 3.2780008  | down | XM_001059141 | RGD1308612 | 311713 |
| 2.3556566  | down | XM_236102    | RGD1309108 | 315578 |
| 5.415354   | down | NM_001034835 | RGD1309220 | 316328 |
| 2.9716413  | down | XM_001055914 | RGD1309374 | 361485 |
| 2.2374732  | down | XM_001057453 | RGD1309403 | 310417 |
| 5.6425543  | down | XM_347094    | RGD1309410 | 363020 |
| 2.1060228  | down | XM_001057186 | RGD1309414 | 361004 |
| 2.2215242  | down | XM_001055847 | RGD1309453 | 310689 |
| 2.0382922  | down | XM_001058624 | RGD1309492 | 314330 |
| 2.2067235  | down | XM_001066609 | RGD1309586 | 364073 |
| 7.202855   | down | XM_001078912 | RGD1309651 | 361424 |
| 18.383722  | down | XM_215788    | RGD1309730 | 295952 |
| 3.9446533  | down | XM_001075822 | RGD1309735 | 360776 |
| 2.74383    | down | XM_341726    | RGD1309759 | 361448 |
| 3.3839571  | down | XM_342856    | RGD1309931 | 362538 |
| 9.742908   | down | XM_001071523 | RGD1309998 | 367088 |
| 2.6147585  | down | XM_001078350 | RGD1310212 | 299557 |
| 6.107417   | down | XM_001064794 | RGD1310384 | 289530 |
| 2.0115058  | down | NM_001025666 | RGD1310572 | 304646 |
| 3.1253002  | down | XM_001071413 | RGD1310727 | 363070 |
| 2.5800922  | down | XM_001079537 | RGD1310754 | 311264 |
| 2.3299797  | down | NM_001024246 | RGD1310794 | 296840 |
| 2.52296    | down | NM_001025007 | RGD1310852 | 314992 |
| 3.2819035  | down | XM_001063794 | RGD1310877 | 305667 |
| 4.7232237  | down | XM_001056694 | RGD1310951 | 313202 |
| 3.9639308  | down | XM_001067680 | RGD1310964 | 304376 |
| 3.042257   | down | XM_001065822 | RGD1311021 | 308765 |
| 6.1592636  | down | NM_001037792 | RGD1311122 | 364154 |
| 2.3973463  | down | XM_001057068 | RGD1311186 | 293587 |
| 14.920316  | down | XM_001059245 | RGD1311190 | 287130 |
| 3.216993   | down | NM_001008307 | RGD1311257 | 294333 |
| 16.475052  | down | NM_001039024 | RGD1311267 | 311429 |
| 4.8204484  | down | NM_001030043 | RGD1311300 | 364378 |
| 15.7222185 | down | XM_001066764 | RGD1311447 | 363276 |

|           |      |              |            |        |
|-----------|------|--------------|------------|--------|
| 2.1123624 | down | XM_001078807 | RGD1311501 | 296599 |
| 2.7659614 | down | NM_001014072 | RGD1311517 | 313775 |
| 4.789803  | down | NM_001079705 | RGD1311558 | 292139 |
| 2.8194854 | down | XM_001059424 | RGD1311783 | 294012 |
| 13.171824 | down | NM_001007738 | RGD1359349 | 361744 |
| 22.115452 | down | XM_235207    | RGD1559489 | 299843 |
| 20.37836  | down | XM_579978    | RGD1559494 | 499535 |
| 4.201423  | down | XM_577489    | RGD1559508 | 502056 |
| 12.63832  | down | XM_001058189 | RGD1559526 | 364929 |
| 14.674456 | down | XM_001070396 | RGD1559532 | 297671 |
| 3.2614403 | down | XM_001060667 | RGD1559582 | 501852 |
| 5.430101  | down | XM_001075881 | RGD1559588 | 304349 |
| 4.976366  | down | XM_229219    | RGD1559599 | 317624 |
| 17.043726 | down | XM_001068894 | RGD1559613 | 499067 |
| 31.085983 | down | XM_225620    | RGD1559615 | 291346 |
| 19.396112 | down | XM_577371    | RGD1559628 | 501945 |
| 14.256798 | down | XM_001054198 | RGD1559643 | 498100 |
| 5.4342914 | down | XM_578466    | RGD1559679 | 502961 |
| 57.55036  | down | XM_344831    | RGD1559699 | 365132 |
| 14.106077 | down | XM_001078945 | RGD1559724 | 299021 |
| 3.221514  | down | XM_001057862 | RGD1559731 | 501512 |
| 7.317103  | down | XM_001054410 | RGD1559747 | 312310 |
| 6.589252  | down | XM_001058285 | RGD1559751 | 498895 |
| 2.8921418 | down | XM_001059587 | RGD1559786 | 298384 |
| 36.243484 | down | XM_227432    | RGD1559837 | 295256 |
| 30.881979 | down | XM_347117    | RGD1559859 | 363244 |
| 3.4665358 | down | XM_573162    | RGD1559875 | 497970 |
| 8.019896  | down | XM_001071693 | RGD1559892 | 367788 |
| 5.528505  | down | XM_001054336 | RGD1559896 | 498967 |
| 4.3481317 | down | XM_001080109 | RGD1559903 | 502418 |
| 3.5795257 | down | XM_001053130 | RGD1559904 | 313061 |
| 27.36057  | down | XM_001055068 | RGD1559932 | 298221 |
| 39.99376  | down | XM_344837    | RGD1559946 | 365141 |
| 5.3558583 | down | XM_001065029 | RGD1559950 | 498686 |
| 49.110302 | down | XM_576496    | RGD1559960 | 501084 |
| 2.8142009 | down | XM_001074365 | RGD1559962 | 498988 |
| 2.5383544 | down | XM_001080931 | RGD1559980 | 499158 |
| 26.933083 | down | XM_001058237 | RGD1559982 | 293850 |
| 53.000248 | down | XM_001061596 | RGD1560019 | 367121 |
| 2.028903  | down | XM_001066502 | RGD1560028 | 500157 |
| 59.589725 | down | XM_001058468 | RGD1560060 | 501598 |
| 5.43044   | down | XM_001075637 | RGD1560069 | 364450 |
| 78.82594  | down | XM_574777    | RGD1560095 | 499454 |
| 34.243793 | down | XM_001054032 | RGD1560096 | 310590 |

|           |      |              |            |        |
|-----------|------|--------------|------------|--------|
| 6.2284083 | down | XM_001053693 | RGD1560109 | 310597 |
| 3.1290843 | down | XM_575275    | RGD1560115 | 499930 |
| 26.273788 | down | XM_001080514 | RGD1560125 | 360825 |
| 62.16751  | down | XM_574775    | RGD1560135 | 499452 |
| 76.74227  | down | XM_577949    | RGD1560140 | 502469 |
| 3.8940368 | down | XM_001059094 | RGD1560146 | 500505 |
| 29.988367 | down | XM_001057615 | RGD1560185 | 502880 |
| 3.1302636 | down | XM_001071412 | RGD1560187 | 362641 |
| 59.010967 | down | XM_344641    | RGD1560209 | 364800 |
| 3.6260898 | down | XM_001063983 | RGD1560218 | 501777 |
| 42.706245 | down | XM_574066    | RGD1560221 | 498780 |
| 29.402885 | down | XM_001062614 | RGD1560224 | 500608 |
| 18.697388 | down | XM_574986    | RGD1560232 | 499667 |
| 7.9487257 | down | XM_001066238 | RGD1560248 | 499797 |
| 41.66997  | down | XM_578421    | RGD1560270 | 502920 |
| 4.803658  | down | XM_001068602 | RGD1560273 | 498405 |
| 17.388441 | down | XM_001080117 | RGD1560350 | 365554 |
| 3.2883391 | down | XM_001081416 | RGD1560383 | 497994 |
| 4.9119673 | down | XM_001080358 | RGD1560398 | 498192 |
| 7.0216565 | down | XM_577218    | RGD1560412 | 501808 |
| 2.4060862 | down | XM_001074947 | RGD1560474 | 501814 |
| 2.0230834 | down | XM_001064461 | RGD1560481 | 500409 |
| 3.151265  | down | XM_231013    | RGD1560483 | 296516 |
| 65.685295 | down | XM_579915    | RGD1560485 | 499053 |
| 40.340405 | down | XM_579909    | RGD1560516 | 499038 |
| 3.485807  | down | XM_578481    | RGD1560532 | 502975 |
| 33.599075 | down | XM_001055007 | RGD1560539 | 502966 |
| 47.563976 | down | XM_574327    | RGD1560543 | 499046 |
| 29.02389  | down | XM_578061    | RGD1560554 | 502576 |
| 73.217545 | down | XM_577908    | RGD1560555 | 502426 |
| 48.177166 | down | XM_229665    | RGD1560570 | 302091 |
| 56.189426 | down | XM_001078732 | RGD1560580 | 288646 |
| 52.326912 | down | XM_001054843 | RGD1560585 | 317597 |
| 14.34938  | down | XM_577379    | RGD1560592 | 501952 |
| 17.713291 | down | XM_344921    | RGD1560663 | 365308 |
| 16.60195  | down | XM_573890    | RGD1560677 | 498612 |
| 6.8873496 | down | XM_001074018 | RGD1560695 | 365063 |
| 5.017714  | down | XM_001071572 | RGD1560716 | 298444 |
| 18.846113 | down | XM_001053122 | RGD1560771 | 498511 |
| 49.06948  | down | XM_577919    | RGD1560777 | 502438 |
| 12.555094 | down | XM_580207    | RGD1560792 | 501530 |
| 19.055119 | down | XM_001066194 | RGD1560803 | 501583 |
| 14.911703 | down | XM_225502    | RGD1560805 | 291269 |
| 63.905495 | down | XM_577734    | RGD1560808 | 502273 |

|           |      |              |            |        |
|-----------|------|--------------|------------|--------|
| 23.71019  | down | XM_576015    | RGD1560812 | 500640 |
| 64.48377  | down | XM_001065293 | RGD1560825 | 685793 |
| 3.2418652 | down | XM_001075200 | RGD1560826 | 295423 |
| 2.8218403 | down | XM_001056252 | RGD1560842 | 299415 |
| 4.411252  | down | XM_573350    | RGD1560888 | 498140 |
| 65.70486  | down | XM_001074010 | RGD1560918 | 364248 |
| 2.9968967 | down | XM_001079189 | RGD1560961 | 311241 |
| 2.4877234 | down | XM_001076947 | RGD1560962 | 503190 |
| 47.218452 | down | XM_577704    | RGD1560972 | 502244 |
| 2.2926927 | down | XM_001067264 | RGD1561029 | 304252 |
| 3.576613  | down | XM_001070819 | RGD1561034 | 308908 |
| 3.0937843 | down | XM_001062296 | RGD1561065 | 317425 |
| 55.07478  | down | XM_001056240 | RGD1561089 | 499664 |
| 5.4729805 | down | XM_228749    | RGD1561106 | 302548 |
| 10.17589  | down | XM_575113    | RGD1561113 | 499780 |
| 16.993826 | down | XM_577620    | RGD1561114 | 502163 |
| 3.5864298 | down | XM_001076251 | RGD1561143 | 304382 |
| 2.4055662 | down | XM_001057166 | RGD1561150 | 298241 |
| 15.657955 | down | XM_577741    | RGD1561155 | 502280 |
| 2.1371028 | down | XM_001056166 | RGD1561157 | 360487 |
| 61.69936  | down | XM_001054260 | RGD1561185 | 502251 |
| 3.2413187 | down | XM_001056406 | RGD1561206 | 308678 |
| 41.63887  | down | XM_576388    | RGD1561216 | 500978 |
| 2.1801636 | down | XM_001061341 | RGD1561229 | 502492 |
| 79.80251  | down | XM_001081347 | RGD1561231 | 291345 |
| 4.144175  | down | XM_001070211 | RGD1561232 | 498086 |
| 4.6632333 | down | XM_001053102 | RGD1561246 | 502959 |
| 14.863697 | down | XM_001080261 | RGD1561251 | 499352 |
| 31.598806 | down | XM_217531    | RGD1561273 | 302093 |
| 4.44891   | down | XM_001057102 | RGD1561282 | 499958 |
| 7.406904  | down | XM_220927    | RGD1561285 | 303555 |
| 21.105354 | down | XM_580123    | RGD1561305 | 500808 |
| 29.618258 | down | XM_001074856 | RGD1561311 | 501693 |
| 18.76211  | down | XM_001074083 | RGD1561314 | 502487 |
| 3.5408733 | down | XM_001066702 | RGD1561318 | 317568 |
| 61.382942 | down | XM_577732    | RGD1561339 | 502271 |
| 27.28675  | down | XM_001058390 | RGD1561341 | 502769 |
| 25.977541 | down | XM_001054863 | RGD1561388 | 499042 |
| 85.89052  | down | XM_574763    | RGD1561401 | 499440 |
| 6.620966  | down | XM_235208    | RGD1561410 | 299844 |
| 2.1156228 | down | XM_001074420 | RGD1561412 | 498490 |
| 6.6696377 | down | XM_001075863 | RGD1561415 | 498943 |
| 71.31637  | down | XM_577708    | RGD1561446 | 502249 |
| 70.94777  | down | XM_574061    | RGD1561493 | 498775 |

|           |      |              |            |        |
|-----------|------|--------------|------------|--------|
| 3.0001743 | down | XM_001077812 | RGD1561507 | 292078 |
| 5.898966  | down | XM_001070135 | RGD1561527 | 301282 |
| 2.8145676 | down | XM_578218    | RGD1561533 | 502719 |
| 78.48385  | down | XM_229383    | RGD1561546 | 301899 |
| 38.016487 | down | XM_345090    | RGD1561557 | 365547 |
| 2.2979007 | down | XM_001075737 | RGD1561589 | 305284 |
| 4.624073  | down | XM_001067850 | RGD1561620 | 291274 |
| 34.581966 | down | XM_001055578 | RGD1561627 | 291595 |
| 45.60873  | down | XM_001079552 | RGD1561654 | 295557 |
| 32.469833 | down | XM_344647    | RGD1561656 | 364810 |
| 29.189262 | down | XM_001054195 | RGD1561667 | 308209 |
| 2.318902  | down | XM_001053081 | RGD1561680 | 361140 |
| 47.217716 | down | XM_577125    | RGD1561684 | 501721 |
| 3.433984  | down | XM_001060826 | RGD1561694 | 498388 |
| 50.157055 | down | XM_001064028 | RGD1561705 | 499290 |
| 33.485363 | down | XM_344825    | RGD1561706 | 365122 |
| 10.777372 | down | XM_001076037 | RGD1561730 | 498169 |
| 52.509365 | down | XM_217910    | RGD1561759 | 308183 |
| 4.478844  | down | XM_001077483 | RGD1561787 | 364149 |
| 4.837485  | down | XM_578508    | RGD1561813 | 502998 |
| 3.2104955 | down | XM_001058905 | RGD1561819 | 502004 |
| 16.551146 | down | XM_001079665 | RGD1561827 | 502960 |
| 21.114765 | down | XM_001053629 | RGD1561828 | 679595 |
| 3.954152  | down | XM_001080370 | RGD1561832 | 499143 |
| 79.16665  | down | XM_346315    | RGD1561834 | 367829 |
| 2.9527893 | down | XM_218061    | RGD1561843 | 308263 |
| 11.945449 | down | XM_344287    | RGD1561956 | 364242 |
| 11.890718 | down | XM_001053365 | RGD1561975 | 291188 |
| 19.73735  | down | XM_001078624 | RGD1561977 | 501903 |
| 2.7247694 | down | XM_001066085 | RGD1562011 | 499297 |
| 29.688736 | down | XM_577621    | RGD1562019 | 502164 |
| 7.8675423 | down | XM_001057648 | RGD1562035 | 290247 |
| 27.537235 | down | XM_001059310 | RGD1562043 | 502083 |
| 57.736885 | down | XM_577947    | RGD1562058 | 502467 |
| 2.0715199 | down | XM_001053262 | RGD1562059 | 361993 |
| 4.338214  | down | XM_001075004 | RGD1562063 | 500896 |
| 3.937947  | down | XM_001076742 | RGD1562114 | 500795 |
| 34.22749  | down | XM_221091    | RGD1562156 | 501740 |
| 2.814241  | down | XM_001058636 | RGD1562200 | 363471 |
| 37.220345 | down | XM_001076534 | RGD1562205 | 307168 |
| 55.84618  | down | XM_578760    | RGD1562282 | 367183 |
| 2.3975215 | down | XM_001058420 | RGD1562284 | 313837 |
| 46.39317  | down | XM_001074199 | RGD1562287 | 300026 |
| 5.5959725 | down | XM_001071441 | RGD1562342 | 500762 |

|           |      |              |            |        |
|-----------|------|--------------|------------|--------|
| 9.79345   | down | XM_574072    | RGD1562352 | 498787 |
| 3.6733363 | down | XM_001053073 | RGD1562415 | 303862 |
| 2.4687512 | down | XM_573791    | RGD1562422 | 498522 |
| 4.8130093 | down | XM_577326    | RGD1562423 | 501902 |
| 24.828718 | down | XM_001068716 | RGD1562428 | 296323 |
| 10.083498 | down | XM_001079744 | RGD1562446 | 499344 |
| 3.2372632 | down | XM_001059208 | RGD1562449 | 366333 |
| 11.607934 | down | XM_001071739 | RGD1562454 | 292938 |
| 18.002138 | down | XM_229083    | RGD1562485 | 302772 |
| 3.8488553 | down | XM_001071419 | RGD1562489 | 287250 |
| 30.472868 | down | XM_001064042 | RGD1562508 | 502058 |
| 10.11852  | down | XM_344096    | RGD1562525 | 363899 |
| 42.791092 | down | XM_001061198 | RGD1562545 | 365857 |
| 26.976238 | down | XM_001067081 | RGD1562546 | 364953 |
| 7.2334976 | down | XM_574124    | RGD1562552 | 498840 |
| 2.5310793 | down | XM_001068226 | RGD1562582 | 499935 |
| 29.321598 | down | XM_577381    | RGD1562612 | 501954 |
| 20.932053 | down | XM_001072696 | RGD1562618 | 501007 |
| 22.7292   | down | XM_001071626 | RGD1562624 | 364249 |
| 30.393906 | down | XM_578244    | RGD1562640 | 502745 |
| 34.145683 | down | XM_001076214 | RGD1562649 | 363887 |
| 36.861694 | down | XM_001054943 | RGD1562650 | 502965 |
| 11.971132 | down | XM_001081656 | RGD1562667 | 501742 |
| 61.589317 | down | XM_577950    | RGD1562670 | 502470 |
| 6.64562   | down | XM_222212    | RGD1562674 | 288691 |
| 54.84976  | down | XM_344833    | RGD1562677 | 365136 |
| 47.04084  | down | XM_001055582 | RGD1562704 | 499665 |
| 61.99517  | down | XM_574093    | RGD1562707 | 498809 |
| 41.612576 | down | XM_576389    | RGD1562714 | 500979 |
| 6.849479  | down | XM_001073387 | RGD1562726 | 498060 |
| 11.082717 | down | XM_001068930 | RGD1562739 | 500875 |
| 5.698164  | down | XM_223623    | RGD1562776 | 289795 |
| 6.001007  | down | XM_001073886 | RGD1562802 | 502505 |
| 4.96522   | down | XM_580242    | RGD1562804 | 502222 |
| 31.06307  | down | XM_001071282 | RGD1562811 | 315651 |
| 5.172605  | down | XM_001080078 | RGD1562814 | 366866 |
| 12.566223 | down | XM_001070013 | RGD1562853 | 501889 |
| 57.126648 | down | XM_216073    | RGD1562877 | 296780 |
| 5.9445853 | down | XM_001055250 | RGD1562882 | 503195 |
| 5.1250477 | down | XM_001073084 | RGD1562885 | 502412 |
| 24.388683 | down | XM_001068190 | RGD1562886 | 363636 |
| 76.1431   | down | XM_577935    | RGD1562893 | 502454 |
| 47.217    | down | XM_577932    | RGD1562919 | 502451 |
| 66.6423   | down | XM_001071176 | RGD1562931 | 502439 |



|            |      |              |            |        |
|------------|------|--------------|------------|--------|
| 5.187207   | down | XM_577316    | RGD1562932 | 501893 |
| 46.0796    | down | XM_344812    | RGD1562948 | 365096 |
| 18.638279  | down | XM_001060329 | RGD1562960 | 503057 |
| 3.2396576  | down | XM_001071898 | RGD1562978 | 502911 |
| 6.3321414  | down | XM_001063038 | RGD1562980 | 302448 |
| 2.7052796  | down | XM_001069698 | RGD1563100 | 299964 |
| 67.44017   | down | XM_579906    | RGD1563107 | 499034 |
| 105.10544  | down | XM_001081417 | RGD1563149 | 502466 |
| 4.3959126  | down | XM_001064380 | RGD1563154 | 296788 |
| 12.225904  | down | XM_001079515 | RGD1563222 | 362175 |
| 4.033698   | down | XM_001068872 | RGD1563224 | 500874 |
| 58.781284  | down | XM_344630    | RGD1563247 | 364781 |
| 9.12067    | down | XM_576197    | RGD1563259 | 500809 |
| 3.677244   | down | XM_001079457 | RGD1563325 | 362857 |
| 10.779356  | down | XM_001078529 | RGD1563350 | 293963 |
| 3.7495496  | down | XM_001068469 | RGD1563375 | 366392 |
| 14.5901985 | down | XM_001059106 | RGD1563378 | 302719 |
| 6.5077806  | down | XM_001063679 | RGD1563425 | 498129 |
| 6.268182   | down | XM_235209    | RGD1563427 | 299845 |
| 7.1318703  | down | XM_001065559 | RGD1563440 | 298301 |
| 10.098069  | down | XM_227852    | RGD1563455 | 311003 |
| 2.5328407  | down | XM_577328    | RGD1563483 | 501904 |
| 30.507233  | down | XM_001068047 | RGD1563486 | 367926 |
| 32.719433  | down | XM_574318    | RGD1563490 | 499025 |
| 24.957422  | down | XM_342547    | RGD1563510 | 362240 |
| 3.7923858  | down | XM_574297    | RGD1563545 | 499004 |
| 7.7652183  | down | XM_001081444 | RGD1563552 | 503129 |
| 8.918577   | down | XM_001064617 | RGD1563606 | 367749 |
| 8.886067   | down | XM_001055699 | RGD1563622 | 502165 |
| 2.0573058  | down | XM_001078978 | RGD1563625 | 503124 |
| 63.178963  | down | XM_344827    | RGD1563626 | 365125 |
| 24.69635   | down | XM_001053995 | RGD1563667 | 365855 |
| 5.5500593  | down | XM_001068301 | RGD1563703 | 361206 |
| 72.80935   | down | XM_001080342 | RGD1563723 | 502462 |
| 20.401329  | down | XM_001066716 | RGD1563727 | 498080 |
| 49.786144  | down | XM_345920    | RGD1563738 | 367059 |
| 49.335907  | down | XM_577701    | RGD1563741 | 502241 |
| 75.868195  | down | XM_001081170 | RGD1563747 | 499439 |
| 30.89371   | down | XM_214327    | RGD1563748 | 290675 |
| 5.6518607  | down | XM_001076316 | RGD1563757 | 367030 |
| 79.03987   | down | XM_577939    | RGD1563772 | 502458 |
| 7.6924124  | down | XM_001062651 | RGD1563782 | 498115 |
| 17.998432  | down | XM_240367    | RGD1563825 | 306366 |
| 62.194412  | down | XM_577929    | RGD1563833 | 502448 |

|            |      |              |            |        |
|------------|------|--------------|------------|--------|
| 55.103424  | down | XM_343520    | RGD1563862 | 363180 |
| 55.84555   | down | XM_344835    | RGD1563865 | 365139 |
| 2.021885   | down | XM_580106    | RGD1563913 | 500691 |
| 2.898771   | down | XM_001072488 | RGD1563937 | 364539 |
| 4.3278165  | down | XM_345580    | RGD1563973 | 366466 |
| 34.669952  | down | XM_236920    | RGD1563979 | 316212 |
| 69.45059   | down | XM_577705    | RGD1564000 | 502246 |
| 29.340425  | down | XM_001056054 | RGD1564016 | 498969 |
| 65.720665  | down | XM_001059672 | RGD1564033 | 680963 |
| 2.6831608  | down | XM_001071594 | RGD1564036 | 497895 |
| 6.193224   | down | XM_001062502 | RGD1564040 | 313410 |
| 25.890831  | down | XM_344095    | RGD1564052 | 363898 |
| 2.3824985  | down | XM_001065792 | RGD1564053 | 500390 |
| 2.0662525  | down | XM_001075668 | RGD1564067 | 499401 |
| 16.189354  | down | XM_001069553 | RGD1564069 | 305202 |
| 2.6903217  | down | XM_001073215 | RGD1564081 | 500943 |
| 3.9311976  | down | XM_001078704 | RGD1564086 | 497862 |
| 9.80291    | down | XM_001067611 | RGD1564095 | 500396 |
| 9.561854   | down | XM_001070381 | RGD1564102 | 501895 |
| 29.882528  | down | XM_001055303 | RGD1564109 | 500115 |
| 83.38731   | down | XM_574773    | RGD1564135 | 499450 |
| 4.9520006  | down | XM_573858    | RGD1564142 | 498582 |
| 17.105919  | down | XM_001053552 | RGD1564173 | 367947 |
| 3.6851697  | down | XM_001078254 | RGD1564195 | 361651 |
| 42.521904  | down | XM_573954    | RGD1564205 | 498671 |
| 14.548396  | down | XM_577618    | RGD1564261 | 502161 |
| 6.3232946  | down | XM_001072962 | RGD1564268 | 300001 |
| 9.663855   | down | XM_577533    | RGD1564276 | 502093 |
| 29.265394  | down | XM_001079282 | RGD1564285 | 299662 |
| 62.51689   | down | XM_001080768 | RGD1564288 | 302278 |
| 47.602978  | down | XM_001070096 | RGD1564295 | 317585 |
| 5.857145   | down | XM_001053680 | RGD1564300 | 361661 |
| 26.59502   | down | XM_578051    | RGD1564313 | 502566 |
| 76.85075   | down | XM_001072043 | RGD1564317 | 498054 |
| 31.997917  | down | XM_001055123 | RGD1564321 | 500114 |
| 10.511169  | down | XM_344622    | RGD1564347 | 364764 |
| 95.777824  | down | XM_001078658 | RGD1564355 | 307681 |
| 9.351596   | down | XM_577770    | RGD1564357 | 502306 |
| 2.8826091  | down | XM_573549    | RGD1564364 | 498325 |
| 13.264487  | down | XM_344301    | RGD1564372 | 364258 |
| 11.9525385 | down | XM_001067675 | RGD1564406 | 501586 |
| 5.519887   | down | XM_234980    | RGD1564409 | 314670 |
| 3.4778469  | down | XM_575480    | RGD1564419 | 500128 |
| 2.3819134  | down | XM_001075226 | RGD1564421 | 498939 |

|           |      |              |            |        |
|-----------|------|--------------|------------|--------|
| 2.066299  | down | XM_001058987 | RGD1564447 | 367254 |
| 5.3711905 | down | XM_001068812 | RGD1564477 | 498882 |
| 3.1933713 | down | XM_001063065 | RGD1564519 | 498072 |
| 3.3470428 | down | XM_577205    | RGD1564563 | 501796 |
| 72.10692  | down | XM_574764    | RGD1564568 | 499441 |
| 4.585708  | down | XM_001075395 | RGD1564575 | 501056 |
| 2.806011  | down | XM_001075441 | RGD1564634 | 294052 |
| 10.204957 | down | XM_001064059 | RGD1564645 | 300874 |
| 70.69095  | down | XM_573610    | RGD1564665 | 498375 |
| 8.938612  | down | XM_001062492 | RGD1564666 | 499627 |
| 87.96133  | down | XM_574778    | RGD1564734 | 499455 |
| 43.498753 | down | XM_001070478 | RGD1564736 | 367932 |
| 36.29862  | down | XM_579977    | RGD1564743 | 499534 |
| 40.24581  | down | XM_001064846 | RGD1564763 | 367747 |
| 4.109993  | down | NM_001024282 | RGD1564767 | 498753 |
| 20.983784 | down | XM_574052    | RGD1564791 | 498766 |
| 7.6717777 | down | XM_001061968 | RGD1564792 | 499976 |
| 36.009716 | down | XM_001065957 | RGD1564798 | 502726 |
| 23.951017 | down | XM_577315    | RGD1564814 | 501892 |
| 4.8693624 | down | XM_001054151 | RGD1564824 | 310382 |
| 49.430393 | down | XM_001071767 | RGD1564836 | 302676 |
| 9.020917  | down | XM_001061065 | RGD1564843 | 302765 |
| 25.385649 | down | XM_001056625 | RGD1564844 | 301172 |
| 83.0519   | down | XM_577726    | RGD1564848 | 502265 |
| 7.523262  | down | XM_001066084 | RGD1564877 | 501581 |
| 12.717138 | down | XM_001067005 | RGD1564927 | 499929 |
| 2.8376765 | down | XM_001070908 | RGD1564937 | 500995 |
| 8.733192  | down | XM_344499    | RGD1564941 | 364538 |
| 62.85847  | down | XM_001076029 | RGD1564977 | 502457 |
| 3.401564  | down | XM_001061359 | RGD1564989 | 499550 |
| 35.331142 | down | XM_001069747 | RGD1564998 | 498323 |
| 5.849451  | down | XM_001066828 | RGD1565014 | 290790 |
| 5.0152664 | down | XM_001074859 | RGD1565043 | 306618 |
| 5.4491315 | down | XM_001068189 | RGD1565058 | 501587 |
| 3.6842685 | down | XM_001076350 | RGD1565088 | 502595 |
| 120.91681 | down | XM_001071285 | RGD1565094 | 502437 |
| 51.895752 | down | XM_001069114 | RGD1565104 | 498924 |
| 77.307976 | down | XM_001080335 | RGD1565115 | 499449 |
| 44.809067 | down | XM_001055593 | RGD1565117 | 299848 |
| 4.5671453 | down | XM_001077736 | RGD1565158 | 288959 |
| 2.1082864 | down | XM_001053261 | RGD1565159 | 310365 |
| 12.146149 | down | XM_001053795 | RGD1565164 | 361582 |
| 2.775423  | down | XM_001079046 | RGD1565166 | 287059 |
| 63.821968 | down | XM_001075702 | RGD1565191 | 499451 |

|           |      |              |            |        |
|-----------|------|--------------|------------|--------|
| 8.108523  | down | XM_343847    | RGD1565203 | 363523 |
| 27.404728 | down | XM_574322    | RGD1565209 | 499033 |
| 79.47711  | down | XM_001054671 | RGD1565231 | 365140 |
| 6.8028736 | down | XM_001059320 | RGD1565257 | 311115 |
| 49.802803 | down | XM_344642    | RGD1565321 | 364801 |
| 11.694885 | down | XM_231601    | RGD1565367 | 312226 |
| 22.549719 | down | XM_001070230 | RGD1565372 | 366307 |
| 2.2233965 | down | XM_001058473 | RGD1565374 | 498128 |
| 62.571712 | down | XM_001054516 | RGD1565379 | 498770 |
| 45.861263 | down | XM_344843    | RGD1565390 | 365149 |
| 4.9631248 | down | XM_001081318 | RGD1565395 | 303471 |
| 7.047041  | down | XM_343330    | RGD1565411 | 363000 |
| 48.750904 | down | XM_576498    | RGD1565421 | 501086 |
| 42.48444  | down | XM_343720    | RGD1565423 | 363385 |
| 34.24915  | down | XM_001068143 | RGD1565430 | 367928 |
| 26.424084 | down | XM_001063293 | RGD1565469 | 502584 |
| 2.0479853 | down | XM_001056411 | RGD1565472 | 498067 |
| 3.941963  | down | XM_001058342 | RGD1565514 | 317614 |
| 3.3516192 | down | XM_001074987 | RGD1565536 | 311323 |
| 65.35155  | down | XM_574776    | RGD1565550 | 499453 |
| 64.34743  | down | XM_577941    | RGD1565576 | 502460 |
| 2.4201868 | down | XM_001055923 | RGD1565598 | 502118 |
| 4.944102  | down | XM_580086    | RGD1565622 | 500582 |
| 2.914194  | down | XM_575255    | RGD1565648 | 499911 |
| 7.3410726 | down | XM_001076237 | RGD1565653 | 367176 |
| 9.997885  | down | XM_001070115 | RGD1565660 | 501896 |
| 6.989474  | down | XM_576548    | RGD1565676 | 501128 |
| 6.3610916 | down | XM_577714    | RGD1565723 | 502254 |
| 8.04413   | down | XM_001076528 | RGD1565742 | 295470 |
| 2.7143092 | down | XM_001059479 | RGD1565784 | 497874 |
| 2.6333387 | down | XM_001061435 | RGD1565785 | 501570 |
| 2.9411497 | down | XM_001080115 | RGD1565800 | 304529 |
| 3.5099952 | down | XM_573888    | RGD1565815 | 498610 |
| 71.293976 | down | XM_001063482 | RGD1565859 | 499291 |
| 2.762488  | down | XM_235047    | RGD1565866 | 314740 |
| 25.280767 | down | XM_233160    | RGD1565911 | 298220 |
| 2.4472566 | down | XM_346994    | RGD1565926 | 361629 |
| 2.3409593 | down | XM_001065138 | RGD1565975 | 291903 |
| 6.3541884 | down | NM_001079892 | RGD1565983 | 317628 |
| 47.598984 | down | XM_001053399 | RGD1566008 | 317604 |
| 3.7309668 | down | XM_001067260 | RGD1566010 | 499195 |
| 22.723927 | down | XM_577863    | RGD1566018 | 502386 |
| 69.881966 | down | XM_344619    | RGD1566040 | 364759 |
| 30.169085 | down | XM_574062    | RGD1566047 | 498776 |

|           |      |              |            |        |
|-----------|------|--------------|------------|--------|
| 2.0214705 | down | XM_001080280 | RGD1566059 | 499858 |
| 2.7026806 | down | XM_001079270 | RGD1566085 | 361819 |
| 23.521967 | down | XM_001081902 | RGD1566091 | 311772 |
| 3.7045357 | down | XM_001060048 | RGD1566107 | 500131 |
| 3.696241  | down | XM_001073756 | RGD1566132 | 502360 |
| 14.766973 | down | XM_001065548 | RGD1566175 | 502142 |
| 15.794219 | down | XM_001070155 | RGD1566186 | 288313 |
| 2.7823706 | down | XM_001079348 | RGD1566207 | 366139 |
| 39.60701  | down | XM_001069834 | RGD1566225 | 317584 |
| 3.9036217 | down | XM_001065647 | RGD1566243 | 500992 |
| 12.402121 | down | XM_234969    | RGD1566251 | 299668 |
| 6.7879534 | down | XM_001067237 | RGD1566252 | 366937 |
| 9.980073  | down | XM_001068981 | RGD1566264 | 366999 |
| 7.7366743 | down | XM_346024    | RGD1566272 | 367226 |
| 13.026837 | down | XM_577997    | RGD1566273 | 502513 |
| 2.6365948 | down | XM_001078793 | RGD1566281 | 364480 |
| 41.24105  | down | XM_001056130 | RGD1566311 | 500963 |
| 2.1646767 | down | XM_001067695 | RGD1566314 | 288106 |
| 23.51745  | down | XM_001054086 | RGD1566337 | 310589 |
| 14.945956 | down | XM_001058667 | RGD1566353 | 502051 |
| 26.707146 | down | XM_580152    | RGD1566370 | 501019 |
| 8.972131  | down | XM_001062354 | Rgma       | 308739 |
| 6.3643765 | down | XM_573061    | Rgs11      | 54291  |
| 2.345901  | down | NM_001077589 | Rgs16      | 360857 |
| 4.6970787 | down | NM_017214    | Rgs4       | 29480  |
| 3.719243  | down | NM_001012347 | Rgs7bp     | 294715 |
| 14.255748 | down | NM_182825    | Rheb11     | 359959 |
| 2.1401496 | down | NM_001013430 | Rhoh       | 305341 |
| 22.348547 | down | NM_001024873 | Rhox11     | 298346 |
| 3.744244  | down | NM_001024889 | Rhox4g     | 313451 |
| 11.489252 | down | NM_001025776 | Rhox8      | 503423 |
| 4.1163797 | down | NM_001024874 | Rhox9      | 298352 |
| 4.910295  | down | XM_001069922 | Rhpn1      | 300030 |
| 6.927771  | down | NM_001013949 | Ribc2      | 300122 |
| 2.2463102 | down | XM_001072861 | Ric3       | 687147 |
| 51.272144 | down | XM_001064091 | Rimbp3     | 303785 |
| 3.6682599 | down | XM_001060530 | Rimklb     | 362428 |
| 22.911516 | down | NM_145881    | Rims2      | 116839 |
| 2.312433  | down | NM_139342    | Ripk3      | 246240 |
| 14.411763 | down | NM_001029904 | Rnase1     | 364304 |
| 15.542345 | down | NM_001025116 | Rnase112   | 305844 |
| 5.8001237 | down | NM_001007015 | Rnase2     | 474169 |
| 4.0849333 | down | XM_001057893 | Rnf144b    | 364681 |
| 4.2224913 | down | XM_001067775 | Rnf150     | 364983 |

|           |      |              |           |        |
|-----------|------|--------------|-----------|--------|
| 22.232473 | down | XM_001053340 | Rnf20     | 313216 |
| 7.411403  | down | XM_001079113 | Rnf222    | 363627 |
| 2.912643  | down | NM_001012095 | Rnf32     | 311936 |
| 2.679267  | down | NM_001024795 | Rnf44     | 361212 |
| 3.678659  | down | XM_001076855 | Rnft2     | 304521 |
| 6.1842585 | down | NM_022188    | Robo1     | 58946  |
| 3.5480654 | down | NM_181375    | Robo4     | 300518 |
| 6.341256  | down | XM_001053288 | Ror2      | 306782 |
| 8.211432  | down | XM_001066326 | Rp111     | 289463 |
| 2.937693  | down | XM_001074462 | Rp9       | 363032 |
| 21.988493 | down | NM_133518    | Rph3a     | 171039 |
| 26.420914 | down | XM_001060195 | Rpl21-ps2 | 681072 |
| 14.060911 | down | XM_001077212 | Rpl29-ps2 | 691206 |
| 26.920214 | down | XM_001078234 | Rps16     | 140655 |
| 2.5962539 | down | XM_001057290 | Rps6kl1   | 299202 |
| 2.4815412 | down | XM_001081775 | Rptor     | 287871 |
| 4.2120037 | down | NM_001009702 | Rrp15     | 360895 |
| 17.374216 | down | NM_001024748 | Rsh11     | 292684 |
| 6.0081654 | down | NM_001013867 | Rsph10b   | 288478 |
| 4.6214314 | down | XM_001062232 | Rspo2     | 500863 |
| 14.16391  | down | XM_575261    | Rspo4     | 499918 |
| 3.1972642 | down | NM_001014172 | Rsrc1     | 361956 |
| 9.202664  | down | NM_001008830 | RT1-A3    | 309627 |
| 2.4003894 | down | NM_001008832 | RT1-CE1   | 309603 |
| 4.6786933 | down | NM_001008833 | RT1-CE10  | 414792 |
| 8.205629  | down | NM_001008834 | RT1-CE11  | 414791 |
| 3.7835855 | down | NM_001008836 | RT1-CE13  | 414790 |
| 9.946089  | down | NM_001008837 | RT1-CE14  | 414270 |
| 2.0771928 | down | NM_001008838 | RT1-CE15  | 414789 |
| 11.320853 | down | NM_001008842 | RT1-CE4   | 414783 |
| 3.186575  | down | NM_001008845 | RT1-CE7   | 368153 |
| 6.082417  | down | NM_001008856 | RT1-O1    | 24751  |
| 2.1627822 | down | NM_001008857 | RT1-S2    | 24994  |
| 2.3332803 | down | XM_001073390 | Rufy3     | 360921 |
| 3.165538  | down | XM_001053893 | Runx1t1   | 362489 |
| 30.459314 | down | NM_001034950 | Rup2      | 619560 |
| 2.6656642 | down | NM_001008310 | Rxfp3     | 294807 |
| 3.4385579 | down | XM_232220    | Rybp      | 312603 |
| 12.818985 | down | NM_053681    | S100a3    | 114216 |
| 2.024448  | down | NM_053587    | S100a9    | 94195  |
| 16.588533 | down | NM_013191    | S100b     | 25742  |
| 34.22198  | down | XM_001067777 | S100z     | 294661 |
| 3.1979976 | down | XM_001059195 | Sap130    | 307527 |
| 16.527136 | down | XM_001061870 | Sat11     | 302325 |

|           |      |              |            |        |
|-----------|------|--------------|------------|--------|
| 2.674293  | down | NM_001044231 | Sbsn       | 292793 |
| 2.612256  | down | XM_001059643 | Scamp1     | 29521  |
| 3.8340788 | down | XM_342279    | Scamp3     | 65169  |
| 6.638437  | down | XM_001066597 | Scand1     | 362252 |
| 5.9634256 | down | NM_139192    | Scd1       | 246074 |
| 6.3547745 | down | NM_001007755 | Scly       | 363285 |
| 4.3507943 | down | XM_001078257 | Scn10a     | 29571  |
| 2.7648692 | down | NM_030875    | Scn1a      | 81574  |
| 3.456404  | down | NM_139097    | Scn3b      | 245956 |
| 4.06827   | down | NM_013125    | Scn5a      | 25665  |
| 4.263318  | down | NM_013026    | Sdc1       | 25216  |
| 15.340193 | down | NM_053893    | Sdc3       | 116673 |
| 5.930665  | down | XM_001081634 | Sdk2       | 360652 |
| 2.2853909 | down | NM_001007712 | Sdpr       | 316384 |
| 20.858728 | down | XM_001067215 | Sec1414    | 498399 |
| 2.205835  | down | XM_001078406 | Sec16a     | 114089 |
| 10.549559 | down | NM_001047921 | Sec61g-ps1 | 367253 |
| 2.1088905 | down | NM_019177    | Sell       | 29259  |
| 2.1068206 | down | NM_017310    | Sema3a     | 29751  |
| 13.356896 | down | XM_001064828 | Sema3e     | 296789 |
| 12.357933 | down | XM_001065817 | Sema4b     | 293042 |
| 2.1557467 | down | XM_001053912 | Sema4d     | 306790 |
| 2.414029  | down | XM_001066339 | Sema5a     | 310207 |
| 9.356468  | down | NM_017308    | Sema6c     | 29744  |
| 96.20738  | down | NM_001002833 | Senp17     | 408216 |
| 3.186419  | down | NM_022519    | Serpina1   | 24648  |
| 6.965761  | down | XM_001067371 | Serpina9   | 299274 |
| 2.1964931 | down | XM_001056687 | Serpina3a  | 498209 |
| 4.300026  | down | NM_012620    | Serpine1   | 24617  |
| 5.451405  | down | XM_001069683 | Sertad4    | 360899 |
| 20.499249 | down | XM_001078230 | Sez6l      | 304554 |
| 12.967701 | down | NM_001011986 | Sf3a2      | 299620 |
| 4.328619  | down | XM_001063601 | Sfi1       | 305467 |
| 4.390878  | down | XM_001058167 | Sgip1      | 313413 |
| 7.4653945 | down | NM_139184    | Sgp158     | 245985 |
| 2.894941  | down | NM_173116    | Sgpl1      | 286896 |
| 7.9632545 | down | XM_001080492 | Sgsm1      | 288743 |
| 3.4384158 | down | NM_031621    | Sh2b3      | 58838  |
| 2.4967134 | down | NM_001048180 | Sh2bpsm1   | 89817  |
| 3.0006394 | down | NM_207605    | Sh2d2a     | 310688 |
| 15.998186 | down | XM_001062584 | Sh2d4b     | 290612 |
| 2.0538917 | down | XM_236252    | Sh2d7      | 300718 |
| 4.601962  | down | NM_022693    | Sh3bp4     | 64634  |
| 9.623292  | down | XM_001074803 | Sh3bp5l    | 690898 |

|           |      |              |          |        |
|-----------|------|--------------|----------|--------|
| 10.625829 | down | NM_031238    | Sh3gl3   | 81921  |
| 2.4867697 | down | XM_001054057 | Sh3md4   | 294557 |
| 27.553213 | down | XM_001072907 | Sh3yl1   | 362724 |
| 7.380468  | down | XM_001061022 | Shcbp1   | 364648 |
| 4.905348  | down | XM_001062249 | She      | 685088 |
| 4.468835  | down | XM_342507    | Shf      | 362205 |
| 3.1051915 | down | XM_001078662 | Shisa6   | 497926 |
| 4.554388  | down | NM_013028    | Shox2    | 25546  |
| 3.504356  | down | NM_001033682 | Shpk     | 287479 |
| 2.4554617 | down | NM_021693    | Sik1     | 59329  |
| 2.3934352 | down | XM_001065493 | Sim1     | 309888 |
| 3.5749335 | down | XM_001062980 | Sin3b    | 683381 |
| 18.494488 | down | XM_345630    | Six2     | 366542 |
| 6.389035  | down | XM_001075407 | Six5     | 308406 |
| 19.673355 | down | NM_173311    | Skap1    | 286975 |
| 10.594855 | down | XM_001054873 | Slamf1   | 498286 |
| 23.399157 | down | XM_222909    | Slamf8   | 289237 |
| 4.0223365 | down | XM_001060131 | Slbp     | 681062 |
| 3.710918  | down | NM_001010948 | Slc10a7  | 291942 |
| 2.55904   | down | NM_001031658 | Slc11a1  | 316519 |
| 3.847254  | down | NM_019345    | Slc12a3  | 54300  |
| 2.135007  | down | XM_001066648 | Slc12a6  | 691209 |
| 2.3651917 | down | NM_001012621 | Slc13a4  | 503568 |
| 13.607092 | down | NM_147216    | Slc16a2  | 259248 |
| 9.118868  | down | NM_001030024 | Slc19a2  | 289175 |
| 5.5625196 | down | XM_001077404 | Slc22a14 | 316061 |
| 8.890682  | down | NM_001004260 | Slc22a18 | 309131 |
| 12.633112 | down | NM_053537    | Slc22a7  | 89776  |
| 6.762331  | down | NM_020090    | Slc24a1  | 56814  |
| 3.8748274 | down | NM_001017488 | Slc24a6  | 498185 |
| 9.805252  | down | NM_017307    | Slc25a1  | 29743  |
| 2.76666   | down | XM_001080562 | Slc25a16 | 361836 |
| 3.3412764 | down | NM_053500    | Slc25a27 | 85262  |
| 2.0518467 | down | XM_001078825 | Slc25a35 | 497933 |
| 2.305566  | down | XM_001070712 | Slc25a42 | 689414 |
| 2.5740523 | down | XM_001071416 | Slc25a45 | 689625 |
| 3.7492485 | down | XM_001055712 | Slc26a10 | 366909 |
| 3.1816266 | down | NM_024143    | Slc27a5  | 79111  |
| 2.4221232 | down | NM_031782    | Slc32a1  | 83612  |
| 5.816059  | down | NM_013030    | Slc34a1  | 25548  |
| 2.4192822 | down | XM_001059113 | Slc35d2  | 290959 |
| 5.499409  | down | XM_001067921 | Slc35e1  | 498599 |
| 3.1714897 | down | NM_001024764 | Slc36a3  | 303148 |
| 3.6065927 | down | XM_001081800 | Slc38a10 | 303740 |



|            |      |              |           |        |
|------------|------|--------------|-----------|--------|
| 2.9130175  | down | NM_001013099 | Slc38a6   | 299139 |
| 2.3821173  | down | NM_001003705 | Slc38a7   | 291840 |
| 2.6995747  | down | XM_001075087 | Slc39a1   | 361986 |
| 4.167592   | down | XM_001070144 | Slc39a14  | 306009 |
| 8.934229   | down | XM_344140    | Slc41a1   | 363985 |
| 2.2551084  | down | XM_001077428 | Slc44a2   | 363024 |
| 41.26858   | down | XM_001077125 | Slc5a10   | 303205 |
| 6.6926985  | down | NM_022590    | Slc5a2    | 64522  |
| 22.426277  | down | NM_001033079 | Slc6a17   | 613226 |
| 6.9344583  | down | NM_053996    | Slc6a7    | 117100 |
| 4.053668   | down | NM_017353    | Slc7a5    | 50719  |
| 5.350253   | down | XM_001074601 | Slc7a6    | 307811 |
| 3.595406   | down | NM_078620    | Slc8a3    | 140448 |
| 3.5264657  | down | NM_173098    | Slc9a4    | 24785  |
| 7.2894835  | down | NM_022667    | Slco2a1   | 24546  |
| 3.3205109  | down | NM_001014270 | Slco6d1   | 367321 |
| 4.067201   | down | XM_001057409 | Slitrk2   | 309349 |
| 5.439242   | down | NM_053372    | Slpi      | 84386  |
| 17.372597  | down | XM_001073602 | Slurp1    | 300016 |
| 2.3912158  | down | NM_031583    | Smc3      | 29486  |
| 15.3255825 | down | NM_031536    | Smcp      | 24899  |
| 3.507605   | down | XM_001077659 | Smcr8     | 497918 |
| 17.643684  | down | XM_217877    | Smok2a    | 292316 |
| 2.2448044  | down | NM_001017497 | Smr3a     | 498341 |
| 4.5935235  | down | NM_030991    | Snap25    | 25012  |
| 7.568907   | down | NM_080777    | Sncb      | 113893 |
| 4.9012475  | down | XM_001068874 | Sned1     | 316638 |
| 3.0875938  | down | XM_001062546 | Snhg8     | 361111 |
| 4.9521627  | down | NM_019378    | Snip      | 56029  |
| 29.195969  | down | NM_001034083 | Snn       | 29140  |
| 3.7222118  | down | NM_138833    | Snrk      | 170837 |
| 2.740366   | down | XM_001064438 | Snrpe     | 685587 |
| 4.744989   | down | XM_001065908 | Snrpel    | 360844 |
| 3.2504313  | down | XM_001058102 | Snrpg     | 681031 |
| 3.8337493  | down | XM_001075060 | Snrpgl2   | 690640 |
| 3.50479    | down | XM_001060066 | Snrpg-ps1 | 680779 |
| 14.423381  | down | XM_001071003 | Sntb2     | 689421 |
| 4.080997   | down | XM_001066932 | Sntg1     | 500394 |
| 5.950488   | down | NM_153728    | Soat2     | 266770 |
| 2.3025825  | down | XM_001081372 | Socs7     | 287659 |
| 2.5037823  | down | XM_001078103 | Sohlh1    | 362085 |
| 11.005976  | down | XM_001070775 | Sorcs1    | 309533 |
| 7.618917   | down | NM_153737    | Sostdc1   | 266803 |
| 14.812423  | down | NM_019193    | Sox10     | 29361  |

|           |      |              |           |        |
|-----------|------|--------------|-----------|--------|
| 4.310573  | down | XM_001060642 | Sox13     | 289026 |
| 6.8710675 | down | XM_344594    | Sox4      | 364712 |
| 9.327687  | down | XM_001081628 | Sox9      | 140586 |
| 3.7633796 | down | NM_181374    | Sp7       | 300260 |
| 3.7098596 | down | XM_001061854 | Sp9       | 366078 |
| 14.912797 | down | NM_145087    | Spag11b   | 246305 |
| 8.52484   | down | NM_031792    | Spag4     | 83623  |
| 4.984041  | down | XM_001063703 | Spag4l    | 296289 |
| 2.098576  | down | XM_001055656 | Spanxn4   | 302832 |
| 2.7964966 | down | NM_134384    | Spata19   | 171403 |
| 11.409575 | down | NM_001004447 | Spata21   | 366491 |
| 13.167501 | down | XM_001069981 | Spdef     | 689210 |
| 2.8541186 | down | XM_345315    | Spen      | 365981 |
| 22.014265 | down | NM_001009976 | Spetex-2A | 364261 |
| 20.690113 | down | NM_001011697 | Spetex-2B | 497084 |
| 32.986237 | down | NM_001011701 | Spetex-2D | 364260 |
| 33.00796  | down | NM_001011702 | Spetex-2E | 361012 |
| 7.4049683 | down | NM_001009968 | Spetex-2F | 316940 |
| 24.5716   | down | NM_001009971 | Spetex-2G | 361099 |
| 14.015352 | down | NM_001009969 | Spetex-2H | 361008 |
| 2.4592133 | down | XM_001066641 | Spin4     | 299038 |
| 8.391985  | down | XM_001055082 | Spock2    | 361840 |
| 4.295527  | down | NM_172067    | Spon1     | 64456  |
| 2.3562298 | down | XM_001065906 | Spp2      | 94168  |
| 6.4076667 | down | XM_001056859 | Sprr1al   | 499660 |
| 4.419601  | down | XM_001053127 | Sprr3     | 310575 |
| 11.875715 | down | NM_001009660 | Spsb2     | 297592 |
| 3.8297334 | down | NM_212522    | Sptb      | 314251 |
| 6.3092723 | down | XM_001081310 | Sptlc3    | 296188 |
| 9.25785   | down | XM_001080836 | Spty2d1   | 500144 |
| 3.2183204 | down | XM_001080260 | Srcap     | 361652 |
| 4.172045  | down | XM_001077242 | Srcrb4d   | 304401 |
| 27.39704  | down | XM_001076245 | Srgap3    | 500287 |
| 10.478328 | down | XM_001074215 | Srp72     | 498351 |
| 7.300302  | down | XM_573405    | Srrm4     | 498189 |
| 2.888992  | down | NM_001014236 | Ssbp4     | 364534 |
| 5.5894194 | down | NM_019348    | Sstr2     | 54305  |
| 3.218166  | down | NM_053635    | St14      | 114093 |
| 4.2346144 | down | XM_001060438 | Stard4    | 291699 |
| 2.1430657 | down | XM_001067555 | Steap1    | 297738 |
| 4.135857  | down | XM_001070878 | Stfa2     | 303909 |
| 2.0769675 | down | XM_577078    | Stk10     | 29398  |
| 8.883028  | down | XM_001058046 | Stk36     | 301516 |
| 5.78747   | down | NM_019362    | Stk39     | 54348  |

|           |      |              |          |        |
|-----------|------|--------------|----------|--------|
| 3.2141066 | down | NM_024346    | Stmn3    | 29246  |
| 4.721293  | down | NM_031126    | Stxbp2   | 81804  |
| 23.95302  | down | XM_001081248 | Stxbp4   | 303443 |
| 2.525851  | down | XM_001078123 | Stxbp6   | 362734 |
| 3.3270826 | down | NM_001009618 | Sub1     | 192269 |
| 3.0107605 | down | NM_134378    | Sulf1    | 171396 |
| 52.0222   | down | NM_133547    | Sult1c2  | 171072 |
| 40.261364 | down | NM_001013177 | Sult1c2a | 316153 |
| 22.78751  | down | NM_031732    | Sult1c3  | 65185  |
| 17.326527 | down | NM_001039665 | Sult2b1  | 292915 |
| 14.128263 | down | XM_001076682 | Susd5    | 301039 |
| 6.839019  | down | XM_001058818 | Suv420h2 | 308345 |
| 24.005527 | down | NM_001007605 | Svs3     | 192239 |
| 21.0679   | down | XM_001070983 | Svs3b    | 296354 |
| 6.364759  | down | XM_001071089 | Svs6     | 362267 |
| 4.82884   | down | NM_001025058 | Syce1    | 502372 |
| 9.838761  | down | XM_001071232 | Syce2    | 364976 |
| 5.16124   | down | NM_013041    | Sycp3    | 25561  |
| 2.2157347 | down | NM_012758    | Syk      | 25155  |
| 6.1263666 | down | NM_021695    | Synpo    | 60324  |
| 7.5448565 | down | NM_134328    | Taar1    | 113914 |
| 25.675163 | down | NM_175590    | Taar7e   | 294133 |
| 42.109985 | down | NM_175587    | Taar7h   | 294130 |
| 3.038993  | down | NM_175600    | Taar8c   | 319105 |
| 3.6318052 | down | NM_012667    | Tacr1    | 24807  |
| 7.9131494 | down | NM_017053    | Tacr3    | 24808  |
| 2.8358464 | down | XM_237792    | Taf15    | 287571 |
| 10.615102 | down | NM_001014155 | Taf1c    | 361420 |
| 4.227436  | down | XM_001058968 | Taf4b    | 680806 |
| 2.1487796 | down | XM_001053692 | Taf5l    | 307927 |
| 3.1761997 | down | XM_001065779 | Taf7     | 307485 |
| 6.1170917 | down | XM_001067756 | Tagap    | 308097 |
| 2.2598703 | down | NM_001002854 | Tanc1    | 311055 |
| 3.0550249 | down | NM_001080938 | Tas2r124 | 690472 |
| 3.5335898 | down | NM_001025419 | Tax1bp3  | 360564 |
| 12.813313 | down | XM_221188    | Tbc1d16  | 303734 |
| 28.580124 | down | XM_001081058 | Tbc1d30  | 299824 |
| 2.2528095 | down | XM_001057308 | Tbc1d7   | 361227 |
| 8.8596    | down | NM_172021    | Tbkbp1   | 266764 |
| 14.02303  | down | XM_001081363 | Tbx21    | 303496 |
| 3.878214  | down | NM_012687    | Tbxas1   | 24886  |
| 5.090951  | down | XM_001069071 | Tcea3    | 298559 |
| 2.9629235 | down | NM_022593    | Tceb1    | 64525  |
| 3.4466717 | down | NM_031129    | Tceb2    | 81807  |

|           |      |              |          |        |
|-----------|------|--------------|----------|--------|
| 10.584422 | down | NM_213561    | Tcf19    | 406195 |
| 7.0150175 | down | XM_001067558 | Tcf23    | 688600 |
| 7.045187  | down | XM_001073458 | Tcf7     | 363595 |
| 16.169626 | down | XM_001062658 | Tcfap2a  | 306862 |
| 12.17776  | down | XM_233526    | Tcfap2e  | 313596 |
| 8.993745  | down | XM_001064620 | Tcp10b   | 308169 |
| 5.1214204 | down | XM_001063024 | Tctex1d1 | 362553 |
| 2.6400044 | down | XM_001072977 | Tctex1d2 | 498095 |
| 11.221302 | down | XM_001073003 | Tdpoz1   | 365854 |
| 5.4460526 | down | XM_001063929 | Tdrd1    | 292129 |
| 3.562421  | down | XM_001069186 | Tead1    | 361630 |
| 3.22328   | down | XM_001080702 | Tead2    | 308582 |
| 6.6962366 | down | NM_001037191 | Tecpr1   | 304285 |
| 2.5850232 | down | NM_001024739 | Tekt3    | 287392 |
| 4.479706  | down | XM_001076953 | Tesc     | 288689 |
| 3.9748976 | down | NM_001013226 | Tesp1    | 363215 |
| 23.580832 | down | XM_001055364 | Tesp2    | 316318 |
| 3.2970421 | down | NM_001008864 | Tessp5   | 408244 |
| 2.085742  | down | XM_576992    | Tex11    | 501588 |
| 3.9375358 | down | NM_057129    | Tff1     | 117270 |
| 9.832263  | down | NM_053844    | Tff2     | 116592 |
| 14.541262 | down | XM_001060570 | Tgfbrap1 | 301373 |
| 2.1227784 | down | NM_019386    | Tgm2     | 56083  |
| 5.475905  | down | XM_001079039 | Tgm6     | 296152 |
| 5.0678086 | down | NM_138840    | Tgoln1   | 192152 |
| 7.4444385 | down | NM_001008340 | Thap1    | 306547 |
| 2.74669   | down | NM_001013966 | Thg11    | 303067 |
| 3.1480958 | down | XM_001064856 | Thsd1    | 364630 |
| 11.364161 | down | XM_222597    | Thsd7b   | 289007 |
| 8.264286  | down | NM_001012108 | Thumpd2  | 313851 |
| 2.2411628 | down | NM_001007661 | Thyn1    | 300470 |
| 2.474867  | down | XM_001054397 | Ticam2   | 364867 |
| 15.252517 | down | NM_001025029 | Tifab    | 364674 |
| 10.430116 | down | XM_001067871 | Tigit    | 363784 |
| 7.125589  | down | NM_001013855 | Timd2    | 287222 |
| 2.0869474 | down | XM_001065015 | Timm50   | 685725 |
| 18.832434 | down | XM_001058904 | Timm8a2  | 680794 |
| 2.252321  | down | XM_001073142 | Tktl2    | 290685 |
| 5.7779307 | down | XM_001080690 | Tlcd2    | 497955 |
| 10.95     | down | NM_001039013 | Tle2     | 299636 |
| 3.0694475 | down | XM_001060099 | Tlr12    | 362604 |
| 34.430576 | down | XM_001054552 | Tlx2     | 680117 |
| 2.2486167 | down | XM_001079837 | Tm4sf5   | 303256 |
| 3.5544846 | down | NM_001011970 | Tm7sf3   | 297725 |

|           |      |              |           |        |
|-----------|------|--------------|-----------|--------|
| 2.33084   | down | NM_023020    | Tmeff1    | 63845  |
| 3.4728181 | down | XM_217247    | Tmem108   | 300967 |
| 26.079529 | down | XM_001057254 | Tmem127   | 311405 |
| 37.02928  | down | XM_001071422 | Tmem130   | 304280 |
| 2.86347   | down | XM_001081021 | Tmem132e  | 287564 |
| 2.3456194 | down | XM_001079995 | Tmem143   | 308593 |
| 4.4577413 | down | XM_001079138 | Tmem149   | 499126 |
| 47.266262 | down | XM_001067823 | Tmem150c  | 360916 |
| 3.554387  | down | NM_057212    | Tmem158   | 117582 |
| 2.8086674 | down | XM_001061410 | Tmem170b  | 361230 |
| 6.2555194 | down | XM_001076493 | Tmem184b  | 362959 |
| 2.2480125 | down | XM_001059247 | Tmem191c  | 680867 |
| 4.676673  | down | XM_001080277 | Tmem20    | 294072 |
| 6.4052186 | down | XM_001071866 | Tmem213   | 689748 |
| 2.795846  | down | XM_001074731 | Tmem216   | 361727 |
| 3.2390783 | down | NM_001014192 | Tmem39b   | 362608 |
| 5.5261703 | down | XM_001064861 | Tmem63b   | 363197 |
| 2.8862386 | down | XM_001068973 | Tmem68    | 312946 |
| 12.517086 | down | XM_001072960 | Tmem82    | 298605 |
| 5.8393135 | down | XM_001075148 | Tmem92    | 690666 |
| 6.954381  | down | NM_022630    | Tmprss11d | 64565  |
| 3.9975812 | down | XM_001074782 | Tmprss11f | 498345 |
| 3.627165  | down | XM_345932    | Tmprss4   | 367074 |
| 2.752349  | down | XM_001065494 | Tnfaip6   | 84397  |
| 2.325662  | down | XM_001056720 | Tnfaip8   | 307428 |
| 14.340917 | down | XM_236246    | Tnfaip8l3 | 315673 |
| 2.3546276 | down | XM_001069338 | Tnfrsf10b | 364420 |
| 5.654168  | down | XM_001076437 | Tnfrsf25  | 500592 |
| 2.7568755 | down | NM_013049    | Tnfrsf4   | 25572  |
| 18.640078 | down | XM_001079627 | Tnk1      | 303247 |
| 3.3417504 | down | NM_001008336 | Tnk2      | 303882 |
| 10.446853 | down | XM_001073586 | Tnn       | 304913 |
| 4.4298162 | down | NM_017144    | Tnni3     | 29248  |
| 99.705536 | down | NM_017057    | Tnp2      | 24840  |
| 5.2462616 | down | NM_001024881 | Tns4      | 303517 |
| 2.2251227 | down | XM_001077625 | Top3a     | 303194 |
| 12.50912  | down | XM_001063870 | Tp53inp2  | 362246 |
| 2.594347  | down | NM_019221    | Tp63      | 246334 |
| 9.717764  | down | XM_001077013 | Tp73      | 362675 |
| 3.5161586 | down | NM_001079531 | Tpmt      | 690050 |
| 3.3659635 | down | NM_053534    | Tpra1     | 85494  |
| 2.1753612 | down | XM_001060281 | Tpx2      | 311546 |
| 3.2151585 | down | NM_001044248 | Traf3ip2  | 361857 |
| 18.309402 | down | XM_001064383 | Tram1     | 312903 |

|           |      |              |          |        |
|-----------|------|--------------|----------|--------|
| 14.83324  | down | XM_001058030 | Trap1a   | 680619 |
| 2.0409422 | down | XM_001063859 | Trem1    | 301229 |
| 5.6933727 | down | XM_001063589 | Trem2    | 301227 |
| 61.934856 | down | XM_576511    | Trem11   | 501096 |
| 10.066272 | down | XM_001059217 | Trem14   | 680862 |
| 6.4654016 | down | NM_013046    | Trh      | 25569  |
| 3.3014073 | down | NM_001082572 | Trim21   | 308901 |
| 3.9790828 | down | NM_001011665 | Trim26   | 309586 |
| 6.3013506 | down | XM_574516    | Trim30   | 499223 |
| 2.1345108 | down | XM_001053970 | Trim36   | 291597 |
| 2.1898646 | down | NM_001013203 | Trim44   | 362172 |
| 2.7656956 | down | XM_001077454 | Trim52   | 290458 |
| 17.178259 | down | XM_001075898 | Trim58   | 303167 |
| 2.042422  | down | XM_001060201 | Trim62   | 313045 |
| 5.897168  | down | XM_001065684 | Trip11   | 314393 |
| 2.0856304 | down | NM_198051    | Trmt11   | 378794 |
| 2.818917  | down | NM_001011895 | Trmt2a   | 287953 |
| 13.34085  | down | NM_001007706 | Trmt61a  | 314462 |
| 5.2546    | down | NM_001083115 | Trpc4    | 84494  |
| 5.0272355 | down | NM_080898    | Trpc5    | 140933 |
| 5.6737666 | down | NM_001037733 | Trpm1    | 361586 |
| 2.6409469 | down | NM_017207    | Trpv2    | 29465  |
| 9.543892  | down | XM_001052990 | Trub2    | 366012 |
| 22.362726 | down | XM_001054665 | Tsfm     | 679068 |
| 9.114251  | down | NM_013116    | Tshb     | 25653  |
| 2.6804051 | down | XM_001073538 | Tsnaxip1 | 498944 |
| 10.098176 | down | NM_001024262 | Tspan11  | 312727 |
| 4.8950973 | down | XM_001065183 | Tspan32  | 685765 |
| 7.771517  | down | NM_001012075 | Tspyl4   | 309828 |
| 3.3878427 | down | NM_001007650 | Tssk3    | 297891 |
| 14.274149 | down | XM_001066190 | Ttbk1    | 316229 |
| 2.1958535 | down | XM_001080916 | Ttbk2    | 311349 |
| 2.3688211 | down | XM_001078737 | Ttc17    | 311224 |
| 3.0527537 | down | NM_001013890 | Ttc29    | 291944 |
| 7.4723063 | down | XM_343094    | Ttc7b    | 362768 |
| 31.891794 | down | XM_576070    | Ttc9     | 500689 |
| 5.825646  | down | NM_001024758 | Ttl10    | 298692 |
| 2.2060044 | down | XM_001070417 | Ttyh1    | 292597 |
| 8.592023  | down | XM_221081    | Ttyh2    | 287803 |
| 22.318333 | down | XM_001073693 | Ttyh3    | 304315 |
| 4.5726905 | down | NM_139254    | Tubb3    | 246118 |
| 2.4709783 | down | XM_345244    | Tuft1    | 365864 |
| 2.9435372 | down | NM_053530    | Twist1   | 85489  |
| 3.4286902 | down | XM_001061592 | Txlna    | 682457 |

|           |      |              |          |        |
|-----------|------|--------------|----------|--------|
| 2.0407162 | down | XM_001067457 | Txndc12  | 298370 |
| 4.873921  | down | NM_001005559 | Txndc2   | 316777 |
| 3.6692493 | down | NM_212525    | Tyropb   | 361537 |
| 2.0179164 | down | XM_001077578 | Uap111   | 296560 |
| 2.8956628 | down | XM_001065047 | Ubash3b  | 315579 |
| 7.3723345 | down | XM_228708    | Ube2q2l  | 317341 |
| 6.8744273 | down | XM_001074290 | Ubiad1   | 313706 |
| 2.3589065 | down | NM_001014117 | Ublcp1   | 360514 |
| 3.1056738 | down | XM_001063674 | Ubt2     | 287178 |
| 3.6114106 | down | XM_001073045 | Ubxn7    | 303878 |
| 20.031277 | down | NM_019150    | Ucn      | 29151  |
| 2.187101  | down | NM_012683    | Ugt1a1   | 24861  |
| 2.044559  | down | XM_001057451 | Ugt3a2   | 294793 |
| 2.049816  | down | NM_019276    | Ugt8     | 50555  |
| 2.0968475 | down | XM_220541    | Ulk2     | 303206 |
| 2.4731581 | down | XM_001079051 | Umodl1   | 365544 |
| 5.100558  | down | XM_001077605 | Unc119b  | 288702 |
| 2.365452  | down | NM_199407    | Unc5c    | 362049 |
| 3.8925326 | down | NM_053845    | Upb1     | 116593 |
| 23.265436 | down | XM_001066120 | Uroc1    | 685999 |
| 2.0424626 | down | XM_001078228 | Ush1c    | 308596 |
| 4.702354  | down | NM_001033687 | Ushbp1   | 290629 |
| 3.019208  | down | XM_001074575 | Usp4     | 290864 |
| 15.562094 | down | NM_019160    | Uts2     | 29180  |
| 79.87199  | down | NM_001008898 | V1ra14   | 297442 |
| 23.42862  | down | NM_001008953 | V1re18   | 494299 |
| 19.019907 | down | XM_001056450 | Vangl2   | 289229 |
| 6.9668207 | down | XM_001055204 | Vasn     | 679921 |
| 3.5489345 | down | NM_001033683 | Vat1     | 287721 |
| 5.9457936 | down | XM_001057825 | Vil1     | 316521 |
| 2.6421413 | down | XM_001077346 | Vill     | 301057 |
| 3.213076  | down | NM_012685    | Vipr1    | 24875  |
| 7.2471523 | down | NM_173112    | Vom1r101 | 286892 |
| 21.687485 | down | NM_173113    | Vom1r105 | 286893 |
| 2.2455554 | down | NM_001008962 | Vom1r12  | 494306 |
| 21.755983 | down | NM_001008952 | Vom1r27  | 494297 |
| 19.054249 | down | NM_001008946 | Vom1r29  | 494292 |
| 7.9714518 | down | NM_001008939 | Vom1r46  | 494286 |
| 13.574978 | down | NM_001008930 | Vom1r52  | 494278 |
| 2.0121384 | down | NM_001008963 | Vom1r54  | 365190 |
| 2.2132733 | down | NM_001009530 | Vom1r85  | 494250 |
| 8.630073  | down | NM_153729    | Vom1r90  | 266771 |
| 3.533272  | down | NM_173297    | Vom1r97  | 286956 |
| 55.709167 | down | XM_001053213 | Vom2r1   | 678740 |

|           |      |              |             |        |
|-----------|------|--------------|-------------|--------|
| 7.2030125 | down | XM_001074899 | Vom2r13     | 690593 |
| 24.75204  | down | XM_218099    | Vom2r2      | 292438 |
| 21.361368 | down | XM_577675    | Vom2r3      | 502213 |
| 3.003517  | down | NM_173319    | Vom2r31     | 286985 |
| 10.111616 | down | NM_173315    | Vom2r32     | 286981 |
| 29.530499 | down | XM_218106    | Vom2r4      | 308248 |
| 10.795661 | down | XM_001081473 | Vom2r40     | 286983 |
| 2.2672434 | down | XM_001053623 | Vom2r43     | 679593 |
| 27.80621  | down | XM_001053116 | Vom2r5      | 679691 |
| 13.583003 | down | XM_001075977 | Vom2r63     | 288541 |
| 11.443346 | down | XM_001060234 | Vom2r64     | 681079 |
| 55.99071  | down | XM_001070665 | Vom2r65     | 689403 |
| 6.4504647 | down | XM_001071469 | Vom2r-ps124 | 689642 |
| 3.0744836 | down | XM_001071402 | Vom2r-ps39  | 502287 |
| 4.6234875 | down | XM_001066381 | Vom2r-ps89  | 304229 |
| 24.531763 | down | XM_001062818 | Vpreb2      | 363830 |
| 2.340953  | down | XM_001077797 | Vps13a      | 309243 |
| 5.2692103 | down | XM_001064954 | Vps36       | 290851 |
| 3.0801206 | down | XM_001074854 | Vps37b      | 288659 |
| 2.831319  | down | XM_213395    | Vps53       | 287535 |
| 2.3685493 | down | NM_001037784 | Vsig1       | 315920 |
| 23.668324 | down | XM_001058168 | Vsig2       | 300520 |
| 4.2755284 | down | XM_001069552 | Vstm2a      | 689106 |
| 6.056609  | down | XM_001058827 | Vsx2        | 171360 |
| 4.40635   | down | XM_578230    | Vwde        | 502731 |
| 4.147468  | down | XM_001064536 | Wdfy2       | 305956 |
| 2.99389   | down | XM_001062583 | Wdhd1       | 305827 |
| 2.6690361 | down | NM_199410    | Wdr12       | 363237 |
| 3.072194  | down | XM_001057879 | Wdr13       | 317370 |
| 3.7655234 | down | XM_001071278 | Wdr20a      | 314453 |
| 4.4579506 | down | XM_001055617 | Wdr27       | 308222 |
| 10.230326 | down | XM_578535    | Wdr35l      | 503018 |
| 3.2214599 | down | XM_344019    | Wdr52       | 363782 |
| 2.0325444 | down | XM_001073107 | Wdr53       | 498097 |
| 2.6549633 | down | XM_218509    | Wdr88       | 292809 |
| 2.122769  | down | XM_001062276 | Wdr90       | 287157 |
| 3.476677  | down | XM_001064989 | Wdte1       | 313020 |
| 2.304006  | down | NM_001012742 | Wee1        | 308937 |
| 12.225084 | down | NM_001008866 | Wfdc12      | 408227 |
| 3.4563618 | down | NM_001009179 | Wfdc15b     | 408230 |
| 2.7327864 | down | XM_001062781 | Wfdc16      | 685201 |
| 3.2262995 | down | XM_001062561 | Wfdc6a      | 685153 |
| 24.087214 | down | XM_001068398 | Wibg        | 366790 |
| 5.159103  | down | XM_340895    | Wipf2       | 360620 |



|           |      |              |         |        |
|-----------|------|--------------|---------|--------|
| 6.2933874 | down | NM_147211    | Wipf3   | 259242 |
| 2.0795703 | down | NM_031590    | Wisp2   | 29576  |
| 2.2059984 | down | XM_001074919 | Wiz     | 314598 |
| 5.1831026 | down | XM_001062326 | Wnt10b  | 315294 |
| 4.4127584 | down | XM_001059030 | Wnt2    | 114487 |
| 4.8066373 | down | XM_001081545 | Wnt3    | 24882  |
| 5.4180894 | down | XM_001076985 | Wnt3a   | 303181 |
| 34.15898  | down | XM_237295    | Wnt6    | 316526 |
| 8.157717  | down | XM_001061171 | Wnt8a   | 291678 |
| 6.5309486 | down | XM_001077006 | Wnt9a   | 287357 |
| 11.90724  | down | NM_031534    | Wt1     | 24883  |
| 3.1337159 | down | XM_001079532 | Wtip    | 361552 |
| 18.38775  | down | NM_001012042 | Xkr6    | 305960 |
| 3.5652435 | down | NM_001012099 | Xkr8    | 313033 |
| 2.2347631 | down | NM_001012230 | Xkrx    | 497101 |
| 77.3982   | down | XM_001073004 | Xlr3a   | 690041 |
| 9.34971   | down | XM_001054068 | Xlr4a   | 293841 |
| 2.3579578 | down | NM_001013863 | Ydjc    | 287938 |
| 4.2478347 | down | NM_033298    | Yes1    | 24884  |
| 4.1754026 | down | NM_001025729 | Zbed3   | 361881 |
| 2.4493458 | down | NM_199496    | Zbtb25  | 314245 |
| 2.2144227 | down | XM_001068541 | Zbtb32  | 688845 |
| 5.843092  | down | XM_001062353 | Zbtb45  | 308366 |
| 8.414466  | down | XM_001075474 | Zbtb48  | 362668 |
| 2.6770947 | down | XM_001060900 | Zbtb8b  | 500553 |
| 2.0496092 | down | XM_224295    | Zc3h13  | 305955 |
| 2.9806151 | down | XM_346320    | Zc4h2   | 367838 |
| 2.4950998 | down | XM_001073035 | Zcchc10 | 360524 |
| 3.3127115 | down | NM_001014065 | Zcchc12 | 313436 |
| 2.8472152 | down | XM_001079169 | Zcchc14 | 365018 |
| 4.518474  | down | XM_001076305 | Zcwpw1  | 304368 |
| 6.8973913 | down | NM_001039101 | Zdhhc15 | 317235 |
| 35.44543  | down | NM_001039009 | Zdhhc21 | 298184 |
| 5.6518793 | down | NM_001039100 | Zdhhc24 | 293665 |
| 3.7060175 | down | NM_001008363 | Zfand2a | 360772 |
| 59.75459  | down | XM_001058915 | Zfhx4   | 310250 |
| 2.4678466 | down | XM_001072483 | Zfp12   | 288486 |
| 15.272711 | down | XM_001078438 | Zfp167  | 363170 |
| 5.730972  | down | XM_225349    | Zfp192  | 306974 |
| 5.909386  | down | XM_001059933 | Zfp275  | 293849 |
| 2.622548  | down | NM_001012058 | Zfp276  | 307924 |
| 18.9585   | down | XM_001064187 | Zfp278  | 305471 |
| 10.034515 | down | XM_001066602 | Zfp29   | 686118 |
| 9.314803  | down | XM_001055374 | Zfp324  | 365192 |

|           |      |              |         |        |
|-----------|------|--------------|---------|--------|
| 2.8585935 | down | NM_058209    | Zfp37   | 115768 |
| 6.2916985 | down | XM_001062461 | Zfp385b | 311137 |
| 3.1799476 | down | XM_001061052 | Zfp407  | 307213 |
| 6.6061435 | down | NM_001079943 | Zfp426l | 367034 |
| 2.2661996 | down | XM_001074185 | Zfp653  | 300446 |
| 4.9964213 | down | NM_001009656 | Zgpat   | 296478 |
| 2.9106355 | down | NM_133620    | Zhx1    | 171159 |
| 6.4303336 | down | XM_341381    | Zic2    | 361096 |
| 3.266217  | down | XM_001068350 | Zim1    | 308322 |
| 4.080939  | down | NM_001025760 | Zkscan1 | 498160 |
| 2.4611647 | down | XM_001061563 | Zmym3   | 317260 |
| 2.6119797 | down | XM_001055163 | Znf213  | 287094 |
| 7.1302958 | down | XM_001053378 | Znf282  | 297065 |
| 2.3991108 | down | NM_145724    | Znf394  | 252860 |
| 4.893431  | down | XM_001080639 | Znf473  | 292884 |
| 8.742044  | down | XM_001057553 | Znf474  | 307310 |
| 6.061874  | down | XM_001061809 | Znf498  | 363872 |
| 3.7457666 | down | XM_001079835 | Znf507  | 292816 |
| 29.118053 | down | XM_001080163 | Znf553  | 308991 |
| 4.234754  | down | XM_001076652 | Znf575  | 308430 |
| 3.0262823 | down | XM_001076726 | Znf609  | 363412 |
| 3.5136085 | down | XM_001064168 | Znf618  | 313253 |
| 11.158872 | down | XM_001080269 | Znf629  | 308998 |
| 2.3363054 | down | XM_001061309 | Znf641  | 300197 |
| 4.0699096 | down | NM_001080207 | Znf652  | 497984 |
| 4.405996  | down | NM_173330    | Znf689  | 286996 |
| 2.2196004 | down | XM_001058556 | Znf703  | 680717 |
| 2.3207905 | down | XM_001068197 | Znf76   | 361809 |
| 2.0452445 | down | XM_001078321 | Znf763  | 314586 |
| 17.080917 | down | XM_001079970 | Znf764  | 691885 |
| 16.940266 | down | XM_001067642 | Znf773  | 502292 |
| 4.5289416 | down | XM_001068316 | Znf804a | 295695 |
| 2.5268648 | down | XM_226449    | Znf821  | 307834 |
| 4.9695725 | down | XM_001076915 | Znhit1  | 360784 |
| 2.19726   | down | XM_001059988 | Zscan20 | 500549 |
| 2.1971748 | down | NM_001008308 | Zufsp   | 294390 |

---

**MiR-434-3p overexpression \_vs\_ Control 2.0 fold up regulated genes**

| Fold change | Regulation | ACCESSION    | GeneSymbol | GeneID |
|-------------|------------|--------------|------------|--------|
| 2.3291411   | up         | NM_130399    | Ada        | 24165  |
| 2.0532598   | up         | XM_001062804 | Aldh5a1    | 291133 |
| 2.7336085   | up         | NM_012777    | Apod       | 25239  |
| 2.3426118   | up         | XM_001061611 | C1r        | 312705 |
| 2.031044    | up         | NM_016994    | C3         | 24232  |
| 3.5443885   | up         | NM_001002805 | C4-2       | 406161 |
| 3.224404    | up         | NM_031504    | C4b        | 24233  |
| 2.0677345   | up         | NM_138915    | Caly       | 192349 |
| 2.4624414   | up         | XM_001066248 | Ccdc150    | 316399 |
| 2.0082316   | up         | NM_130812    | Cdkn2b     | 25164  |
| 2.281728    | up         | XM_001074104 | Cish       | 83681  |
| 2.1080773   | up         | XM_001074417 | Cox19      | 304330 |
| 6.3228664   | up         | NM_080399    | Ddit4l     | 140582 |
| 2.1313102   | up         | XM_001081786 | Eif4a3     | 688288 |
| 2.0268247   | up         | XM_001071395 | Exosc3     | 313243 |
| 2.2058744   | up         | NM_001014050 | Fam110a    | 311535 |
| 2.2469897   | up         | XM_001062665 | Fam163b    | 685169 |
| 2.5436077   | up         | XM_001061851 | Fam186a    | 684999 |
| 2.2158797   | up         | NM_022182    | Fgf7       | 29348  |
| 2.014882    | up         | XM_001064153 | Frg1l      | 361156 |
| 4.285344    | up         | NM_001077640 | Gadd45g    | 291005 |
| 2.0066333   | up         | NM_012736    | Gpd2       | 25062  |
| 2.0962913   | up         | NM_181770    | Gpr119     | 302813 |
| 2.0294363   | up         | NM_031623    | Grb14      | 58844  |
| 2.1656728   | up         | NM_017122    | Hpca       | 29177  |
| 2.2540815   | up         | XM_001053962 | Hrasls     | 288025 |
| 2.1894298   | up         | NM_001082477 | Igf1       | 24482  |
| 2.0168078   | up         | NM_001013048 | Igfbp7     | 289560 |
| 2.2563148   | up         | XM_001074037 | Imp3       | 315697 |
| 2.3453574   | up         | XM_001069483 | Kdm1       | 500569 |
| 2.148561    | up         | XM_001065538 | Klhl8      | 289457 |
| 4.997229    | up         | XM_001063981 | Krtap21-2  | 685485 |
| 3.3775198   | up         | XM_577124    | Krtap2-4   | 501720 |
| 2.5803301   | up         | XM_001055597 | Ldoc1      | 367956 |
| 2.3878047   | up         | XM_001064280 | LOC287921  | 287921 |
| 2.9513376   | up         | XM_001066324 | LOC288419  | 288419 |
| 2.1946557   | up         | XM_223807    | LOC289918  | 289918 |
| 2.2405474   | up         | XM_001071880 | LOC293697  | 293697 |
| 4.0627837   | up         | XM_228268    | LOC294497  | 294497 |
| 5.454705    | up         | XM_001065571 | LOC298820  | 298820 |
| 2.2155619   | up         | XM_236873    | LOC301193  | 301193 |
| 2.9118931   | up         | XM_001074409 | LOC301748  | 301748 |

|           |    |              |           |        |
|-----------|----|--------------|-----------|--------|
| 3.0154173 | up | XM_229238    | LOC301772 | 301772 |
| 2.292094  | up | XM_229292    | LOC301816 | 301816 |
| 3.9416857 | up | XM_001061753 | LOC301839 | 301839 |
| 2.5699413 | up | XM_217510    | LOC301977 | 301977 |
| 3.6752853 | up | XM_229524    | LOC302000 | 302000 |
| 3.0733488 | up | XM_217530    | LOC302085 | 302085 |
| 3.0800085 | up | XM_001065392 | LOC302192 | 302192 |
| 2.589499  | up | XM_217542    | LOC302199 | 302199 |
| 2.1098735 | up | XM_223806    | LOC305698 | 305698 |
| 2.2127109 | up | XM_001081925 | LOC305771 | 305771 |
| 3.5160017 | up | XM_001065941 | LOC306312 | 306312 |
| 8.524204  | up | XM_224750    | LOC306365 | 306365 |
| 2.6962013 | up | XM_001081637 | LOC307706 | 307706 |
| 4.970486  | up | XM_217963    | LOC308198 | 308198 |
| 3.7739859 | up | XM_236887    | LOC316192 | 316192 |
| 2.0648422 | up | XM_001078812 | LOC316493 | 316493 |
| 2.416704  | up | XM_229366    | LOC316856 | 316856 |
| 2.5627372 | up | XM_001064910 | LOC316873 | 316873 |
| 2.7373226 | up | XM_229488    | LOC316919 | 316919 |
| 3.304061  | up | XM_229505    | LOC316931 | 316931 |
| 2.9259698 | up | XM_229508    | LOC316933 | 316933 |
| 2.3500063 | up | XM_001078949 | LOC317085 | 317085 |
| 3.717472  | up | XM_001057404 | LOC360998 | 360998 |
| 3.668232  | up | XM_001061883 | LOC363181 | 363181 |
| 2.3723235 | up | XM_347120    | LOC363301 | 363301 |
| 4.092005  | up | XM_001062328 | LOC363306 | 363306 |
| 2.2208025 | up | XM_343660    | LOC363320 | 363320 |
| 3.3853881 | up | XM_343663    | LOC363324 | 363324 |
| 2.3424554 | up | XM_343674    | LOC363336 | 363336 |
| 2.5568564 | up | NM_001014221 | LOC363337 | 363337 |
| 3.63308   | up | XM_001081023 | LOC363343 | 363343 |
| 3.0022    | up | XM_001076189 | LOC363354 | 363354 |
| 2.3041904 | up | XM_001077951 | LOC363363 | 363363 |
| 3.0145245 | up | XM_001074547 | LOC363380 | 363380 |
| 3.8859959 | up | XM_343727    | LOC363397 | 363397 |
| 4.428336  | up | XM_343755    | LOC363433 | 363433 |
| 3.3838935 | up | XM_343756    | LOC363434 | 363434 |
| 3.4362752 | up | XM_344247    | LOC364164 | 364164 |
| 2.425887  | up | XM_344294    | LOC364250 | 364250 |
| 3.3842156 | up | XM_001053352 | LOC365499 | 365499 |
| 3.9976592 | up | XM_001055159 | LOC365501 | 365501 |
| 2.6256914 | up | XM_345058    | LOC365502 | 365502 |
| 3.2740605 | up | XM_345061    | LOC365506 | 365506 |
| 5.8581786 | up | XM_001070902 | LOC366780 | 366780 |

|           |    |              |           |        |
|-----------|----|--------------|-----------|--------|
| 2.344636  | up | XM_001078369 | LOC367377 | 367377 |
| 4.3453546 | up | XM_001067423 | LOC367381 | 367381 |
| 4.2712193 | up | XM_346138    | LOC367436 | 367436 |
| 3.6702027 | up | XM_001059570 | LOC367485 | 367485 |
| 2.265313  | up | XM_001075365 | LOC367493 | 367493 |
| 2.0016234 | up | XM_001062392 | LOC367516 | 367516 |
| 2.1113546 | up | XM_346193    | LOC367523 | 367523 |
| 2.9983046 | up | XM_001063146 | LOC367539 | 367539 |
| 2.742218  | up | XM_001081934 | LOC367617 | 367617 |
| 2.7056704 | up | XM_346234    | LOC367632 | 367632 |
| 3.092772  | up | XM_346241    | LOC367653 | 367653 |
| 3.7604427 | up | XM_573546    | LOC498320 | 498320 |
| 2.0539243 | up | XM_001061548 | LOC498372 | 498372 |
| 4.212043  | up | XM_573609    | LOC498374 | 498374 |
| 2.037956  | up | XM_573699    | LOC498444 | 498444 |
| 3.5069547 | up | XM_001079520 | LOC498446 | 498446 |
| 3.5352485 | up | XM_001076556 | LOC498463 | 498463 |
| 2.1223006 | up | XM_001072047 | LOC498465 | 498465 |
| 2.4272547 | up | XM_573724    | LOC498467 | 498467 |
| 2.2594962 | up | XM_573725    | LOC498468 | 498468 |
| 2.4872637 | up | XM_573738    | LOC498480 | 498480 |
| 2.3099864 | up | XM_573955    | LOC498672 | 498672 |
| 5.9924226 | up | XM_001063340 | LOC498781 | 498781 |
| 4.522934  | up | XM_579956    | LOC499384 | 499384 |
| 2.6361122 | up | XM_001079909 | LOC499779 | 499779 |
| 2.885358  | up | XM_001077472 | LOC500584 | 500584 |
| 2.283609  | up | XM_576202    | LOC500815 | 500815 |
| 2.163841  | up | XM_576504    | LOC501089 | 501089 |
| 2.9291902 | up | XM_576506    | LOC501091 | 501091 |
| 3.1863053 | up | XM_576507    | LOC501092 | 501092 |
| 2.1161885 | up | XM_580174    | LOC501212 | 501212 |
| 2.6657073 | up | XM_001067568 | LOC501220 | 501220 |
| 3.758037  | up | XM_576645    | LOC501222 | 501222 |
| 2.9512527 | up | XM_001071000 | LOC501223 | 501223 |
| 4.0529714 | up | XM_576649    | LOC501226 | 501226 |
| 4.9073195 | up | XM_001076269 | LOC501230 | 501230 |
| 2.9731553 | up | XM_576656    | LOC501235 | 501235 |
| 4.0691037 | up | XM_576669    | LOC501250 | 501250 |
| 3.3649178 | up | XM_576670    | LOC501251 | 501251 |
| 2.0399616 | up | XM_576671    | LOC501252 | 501252 |
| 3.4047549 | up | XM_576674    | LOC501255 | 501255 |
| 2.7326708 | up | XM_576675    | LOC501256 | 501256 |
| 5.3115973 | up | XM_576687    | LOC501271 | 501271 |
| 3.6445477 | up | XM_576689    | LOC501274 | 501274 |

|           |    |              |           |        |
|-----------|----|--------------|-----------|--------|
| 3.3997746 | up | XM_576705    | LOC501292 | 501292 |
| 3.4637735 | up | XM_576712    | LOC501299 | 501299 |
| 2.8907304 | up | XM_576715    | LOC501302 | 501302 |
| 2.3262646 | up | XM_576718    | LOC501305 | 501305 |
| 3.2684124 | up | XM_576719    | LOC501306 | 501306 |
| 2.5523398 | up | XM_576720    | LOC501307 | 501307 |
| 2.3789747 | up | XM_001068431 | LOC501321 | 501321 |
| 2.3029492 | up | XM_001059339 | LOC501329 | 501329 |
| 2.567176  | up | XM_576744    | LOC501333 | 501333 |
| 3.0535045 | up | XM_576745    | LOC501334 | 501334 |
| 2.406013  | up | XM_001081326 | LOC501342 | 501342 |
| 4.072971  | up | XM_576757    | LOC501346 | 501346 |
| 3.7041378 | up | XM_576760    | LOC501349 | 501349 |
| 2.5708494 | up | XM_001077232 | LOC501350 | 501350 |
| 2.3429332 | up | XM_576770    | LOC501358 | 501358 |
| 3.0204566 | up | XM_001074895 | LOC501362 | 501362 |
| 3.197504  | up | XM_576779    | LOC501366 | 501366 |
| 3.2608733 | up | XM_576781    | LOC501368 | 501368 |
| 3.5371256 | up | XM_576782    | LOC501369 | 501369 |
| 3.1269917 | up | XM_001069914 | LOC501373 | 501373 |
| 2.3987532 | up | XM_576790    | LOC501377 | 501377 |
| 2.2681165 | up | XM_001081029 | LOC501383 | 501383 |
| 2.7903717 | up | XM_576799    | LOC501386 | 501386 |
| 2.3583522 | up | XM_576801    | LOC501388 | 501388 |
| 2.75793   | up | XM_576802    | LOC501389 | 501389 |
| 2.290257  | up | XM_580189    | LOC501391 | 501391 |
| 4.4871964 | up | XM_576812    | LOC501399 | 501399 |
| 3.3765566 | up | XM_576813    | LOC501400 | 501400 |
| 2.1818562 | up | XM_576828    | LOC501417 | 501417 |
| 3.2680905 | up | XM_001058335 | LOC501421 | 501421 |
| 2.4480462 | up | XM_001078724 | LOC501427 | 501427 |
| 3.715179  | up | XM_576877    | LOC501467 | 501467 |
| 2.690287  | up | XM_576879    | LOC501469 | 501469 |
| 2.5234537 | up | XM_001066518 | LOC501470 | 501470 |
| 2.238637  | up | XM_576882    | LOC501474 | 501474 |
| 2.1973398 | up | XM_001080724 | LOC501476 | 501476 |
| 2.7639308 | up | XM_576885    | LOC501477 | 501477 |
| 4.469603  | up | XM_001081012 | LOC501479 | 501479 |
| 2.2795527 | up | XM_001080503 | LOC501482 | 501482 |
| 2.4388347 | up | XM_576890    | LOC501483 | 501483 |
| 4.5627065 | up | XM_580199    | LOC501485 | 501485 |
| 2.138379  | up | XM_576894    | LOC501488 | 501488 |
| 2.1375775 | up | XM_576897    | LOC501491 | 501491 |
| 3.6205425 | up | XM_001066422 | LOC501791 | 501791 |

|           |    |              |           |        |
|-----------|----|--------------|-----------|--------|
| 2.4811885 | up | XM_001069885 | LOC501799 | 501799 |
| 3.9606607 | up | XM_001070011 | LOC501800 | 501800 |
| 3.3163695 | up | XM_001081795 | LOC501937 | 501937 |
| 6.074038  | up | XM_001071460 | LOC502276 | 502276 |
| 5.025355  | up | XM_001071332 | LOC502279 | 502279 |
| 3.1145644 | up | XM_577967    | LOC502486 | 502486 |
| 4.0135317 | up | XM_578861    | LOC503327 | 503327 |
| 5.105775  | up | XM_001053092 | LOC678713 | 678713 |
| 3.780789  | up | XM_001053285 | LOC678755 | 678755 |
| 3.0097826 | up | XM_001053936 | LOC678951 | 678951 |
| 2.9500892 | up | XM_001054541 | LOC679066 | 679066 |
| 2.733043  | up | XM_001054917 | LOC679152 | 679152 |
| 2.2564504 | up | XM_001055060 | LOC679174 | 679174 |
| 2.1192772 | up | XM_001055619 | LOC679284 | 679284 |
| 3.9960556 | up | XM_001056500 | LOC679467 | 679467 |
| 3.5477686 | up | XM_001056539 | LOC679474 | 679474 |
| 3.382224  | up | XM_001053499 | LOC679562 | 679562 |
| 2.3136287 | up | XM_001053708 | LOC679608 | 679608 |
| 5.125708  | up | XM_001053745 | LOC679613 | 679613 |
| 2.1267974 | up | XM_001053751 | LOC679615 | 679615 |
| 3.0059063 | up | XM_001053909 | LOC679662 | 679662 |
| 6.900456  | up | XM_001054076 | LOC679696 | 679696 |
| 4.2452507 | up | XM_001054104 | LOC679703 | 679703 |
| 3.2003598 | up | XM_001054169 | LOC679718 | 679718 |
| 3.7635226 | up | XM_001054170 | LOC679719 | 679719 |
| 4.036247  | up | XM_001054202 | LOC679724 | 679724 |
| 2.2849212 | up | XM_001054232 | LOC679730 | 679730 |
| 2.0428164 | up | XM_001054303 | LOC679745 | 679745 |
| 2.284564  | up | XM_001054394 | LOC679766 | 679766 |
| 2.5535085 | up | XM_001054477 | LOC679792 | 679792 |
| 2.0516806 | up | XM_001054511 | LOC679798 | 679798 |
| 3.681184  | up | XM_001054539 | LOC679807 | 679807 |
| 4.048343  | up | XM_001054768 | LOC679861 | 679861 |
| 4.9608517 | up | XM_001054782 | LOC679867 | 679867 |
| 2.0527868 | up | XM_001054812 | LOC679879 | 679879 |
| 2.1938846 | up | XM_001054886 | LOC679901 | 679901 |
| 2.7065601 | up | XM_001054925 | LOC679909 | 679909 |
| 4.729544  | up | XM_001054988 | LOC679927 | 679927 |
| 2.1972082 | up | XM_001054993 | LOC679930 | 679930 |
| 2.197498  | up | XM_001055170 | LOC679982 | 679982 |
| 6.4203715 | up | XM_001055300 | LOC680010 | 680010 |
| 2.781177  | up | XM_001055404 | LOC680029 | 680029 |
| 2.5484734 | up | XM_001055521 | LOC680062 | 680062 |
| 3.188386  | up | XM_001055573 | LOC680075 | 680075 |

|           |    |              |           |        |
|-----------|----|--------------|-----------|--------|
| 3.363838  | up | XM_001055748 | LOC680106 | 680106 |
| 2.1907623 | up | XM_001055766 | LOC680112 | 680112 |
| 3.0750334 | up | XM_001055864 | LOC680136 | 680136 |
| 2.9590342 | up | XM_001055983 | LOC680166 | 680166 |
| 3.5477006 | up | XM_001056044 | LOC680185 | 680185 |
| 3.5951362 | up | XM_001056442 | LOC680281 | 680281 |
| 3.8544183 | up | XM_001056624 | LOC680318 | 680318 |
| 4.3920093 | up | XM_001056791 | LOC680347 | 680347 |
| 3.5489097 | up | XM_001056978 | LOC680387 | 680387 |
| 3.096708  | up | XM_001057146 | LOC680429 | 680429 |
| 5.219148  | up | XM_001057154 | LOC680431 | 680431 |
| 3.0004847 | up | XM_001057208 | LOC680443 | 680443 |
| 2.6329355 | up | XM_001053549 | LOC680453 | 680453 |
| 2.0044558 | up | XM_001057350 | LOC680475 | 680475 |
| 2.106625  | up | XM_001057558 | LOC680525 | 680525 |
| 2.303001  | up | XM_001057668 | LOC680547 | 680547 |
| 5.078352  | up | XM_001057966 | LOC680608 | 680608 |
| 5.158419  | up | XM_001058086 | LOC680636 | 680636 |
| 3.6746926 | up | XM_001058089 | LOC680637 | 680637 |
| 2.3301291 | up | XM_001058184 | LOC680653 | 680653 |
| 4.067345  | up | XM_001058208 | LOC680658 | 680658 |
| 2.6368074 | up | XM_001058554 | LOC680716 | 680716 |
| 3.6694374 | up | XM_001058696 | LOC680748 | 680748 |
| 7.110875  | up | XM_001058749 | LOC680759 | 680759 |
| 3.6066546 | up | XM_001059100 | LOC680831 | 680831 |
| 2.837026  | up | XM_001059281 | LOC680879 | 680879 |
| 2.404861  | up | XM_001059970 | LOC681020 | 681020 |
| 2.4544067 | up | XM_001059994 | LOC681027 | 681027 |
| 2.0882094 | up | XM_001060161 | LOC681067 | 681067 |
| 2.0192235 | up | XM_001060188 | LOC681071 | 681071 |
| 2.555301  | up | XM_001060331 | LOC681105 | 681105 |
| 3.056849  | up | XM_001060374 | LOC681115 | 681115 |
| 2.1558707 | up | XM_001060390 | LOC681122 | 681122 |
| 2.292319  | up | XM_001060454 | LOC681139 | 681139 |
| 6.7606597 | up | XM_001060513 | LOC681151 | 681151 |
| 3.4643826 | up | XM_001060628 | LOC681176 | 681176 |
| 3.019687  | up | XM_001059937 | LOC681180 | 681180 |
| 2.2534416 | up | XM_001060675 | LOC681187 | 681187 |
| 3.4798417 | up | XM_001060741 | LOC681204 | 681204 |
| 2.4023561 | up | XM_001060797 | LOC681220 | 681220 |
| 3.030925  | up | XM_001060847 | LOC681230 | 681230 |
| 2.8791451 | up | XM_001060969 | LOC681259 | 681259 |
| 2.2754366 | up | XM_001061073 | LOC681283 | 681283 |
| 2.7959552 | up | XM_001061123 | LOC681296 | 681296 |



|           |    |              |           |        |
|-----------|----|--------------|-----------|--------|
| 2.1898184 | up | XM_001061128 | LOC681299 | 681299 |
| 2.4153967 | up | XM_001061298 | LOC681333 | 681333 |
| 2.4282184 | up | XM_001061372 | LOC681353 | 681353 |
| 2.3465579 | up | XM_001061602 | LOC681405 | 681405 |
| 3.1889477 | up | XM_001057300 | LOC681537 | 681537 |
| 2.6562676 | up | XM_001057478 | LOC681575 | 681575 |
| 3.3137681 | up | XM_001057766 | LOC681652 | 681652 |
| 2.7165701 | up | XM_001057939 | LOC681685 | 681685 |
| 2.319809  | up | XM_001058241 | LOC681743 | 681743 |
| 4.4879203 | up | XM_001059139 | LOC681968 | 681968 |
| 3.7391763 | up | XM_001060373 | LOC682199 | 682199 |
| 7.085001  | up | XM_001060443 | LOC682210 | 682210 |
| 2.5641801 | up | XM_001060854 | LOC682289 | 682289 |
| 2.302395  | up | XM_001061066 | LOC682335 | 682335 |
| 5.608393  | up | XM_001061832 | LOC682515 | 682515 |
| 2.5731301 | up | XM_001062253 | LOC682603 | 682603 |
| 4.378068  | up | XM_001063145 | LOC682796 | 682796 |
| 2.8800044 | up | XM_001063233 | LOC682815 | 682815 |
| 2.1568606 | up | XM_001063412 | LOC682856 | 682856 |
| 4.4688497 | up | XM_001063439 | LOC682858 | 682858 |
| 2.3172922 | up | XM_001063448 | LOC682859 | 682859 |
| 2.1036186 | up | XM_001063527 | LOC682880 | 682880 |
| 2.6834614 | up | XM_001063558 | LOC682885 | 682885 |
| 2.7515156 | up | XM_001064138 | LOC683020 | 683020 |
| 2.999833  | up | XM_001064734 | LOC683166 | 683166 |
| 2.1664553 | up | XM_001065323 | LOC683308 | 683308 |
| 3.388759  | up | XM_001066056 | LOC683469 | 683469 |
| 2.4293935 | up | XM_001067117 | LOC683698 | 683698 |
| 2.0699224 | up | XM_001067816 | LOC683865 | 683865 |
| 2.9391859 | up | XM_001067901 | LOC683878 | 683878 |
| 2.7309904 | up | XM_001068139 | LOC683944 | 683944 |
| 3.3860204 | up | XM_001068277 | LOC683973 | 683973 |
| 2.2300637 | up | XM_001068831 | LOC684077 | 684077 |
| 2.9982889 | up | XM_001069050 | LOC684128 | 684128 |
| 3.0683672 | up | XM_001069080 | LOC684134 | 684134 |
| 4.5896792 | up | XM_001069913 | LOC684337 | 684337 |
| 2.729958  | up | XM_001071070 | LOC684575 | 684575 |
| 3.3407145 | up | XM_001071142 | LOC684587 | 684587 |
| 2.723823  | up | XM_001055278 | LOC684652 | 684652 |
| 3.7084215 | up | XM_001071746 | LOC684725 | 684725 |
| 3.3427954 | up | XM_001071914 | LOC684779 | 684779 |
| 2.1340368 | up | XM_001071939 | LOC684787 | 684787 |
| 2.1939297 | up | XM_001072070 | LOC684824 | 684824 |
| 2.1462598 | up | XM_001072410 | LOC684907 | 684907 |

|           |    |              |           |        |
|-----------|----|--------------|-----------|--------|
| 4.2841573 | up | XM_001072445 | LOC684915 | 684915 |
| 2.5040884 | up | XM_001061802 | LOC684990 | 684990 |
| 3.1784933 | up | XM_001061948 | LOC685019 | 685019 |
| 2.8992252 | up | XM_001057025 | LOC685044 | 685044 |
| 2.2749364 | up | XM_001062073 | LOC685053 | 685053 |
| 3.222528  | up | XM_001062150 | LOC685071 | 685071 |
| 2.4854565 | up | XM_001062177 | LOC685075 | 685075 |
| 3.0498958 | up | XM_001063598 | LOC685110 | 685110 |
| 3.0631053 | up | XM_001062428 | LOC685125 | 685125 |
| 2.9890542 | up | XM_001062656 | LOC685166 | 685166 |
| 2.2234259 | up | XM_001062681 | LOC685176 | 685176 |
| 2.5382268 | up | XM_001062796 | LOC685205 | 685205 |
| 2.4305863 | up | XM_001057196 | LOC685285 | 685285 |
| 2.157312  | up | XM_001057314 | LOC685300 | 685300 |
| 4.838328  | up | XM_001063228 | LOC685303 | 685303 |
| 3.9121387 | up | XM_001063242 | LOC685306 | 685306 |
| 3.0019865 | up | XM_001057537 | LOC685344 | 685344 |
| 2.962859  | up | XM_001063434 | LOC685347 | 685347 |
| 5.1111727 | up | XM_001063435 | LOC685348 | 685348 |
| 2.0465982 | up | XM_001063442 | LOC685349 | 685349 |
| 3.5002348 | up | XM_001063496 | LOC685363 | 685363 |
| 2.0128787 | up | XM_001063513 | LOC685369 | 685369 |
| 2.442179  | up | XM_001063529 | LOC685371 | 685371 |
| 2.5696907 | up | XM_001063548 | LOC685377 | 685377 |
| 3.9270394 | up | XM_001063606 | LOC685392 | 685392 |
| 2.136064  | up | XM_001063747 | LOC685424 | 685424 |
| 2.2203019 | up | XM_001057638 | LOC685435 | 685435 |
| 2.2578292 | up | XM_001063788 | LOC685437 | 685437 |
| 3.0589108 | up | XM_001063877 | LOC685459 | 685459 |
| 2.1970782 | up | XM_001063912 | LOC685469 | 685469 |
| 4.3820677 | up | XM_001064038 | LOC685496 | 685496 |
| 4.4127774 | up | XM_001064282 | LOC685552 | 685552 |
| 3.2769318 | up | XM_001064363 | LOC685573 | 685573 |
| 4.00499   | up | XM_001064447 | LOC685593 | 685593 |
| 2.4797194 | up | XM_001057826 | LOC685609 | 685609 |
| 3.91345   | up | XM_001064704 | LOC685661 | 685661 |
| 2.8989809 | up | XM_001064760 | LOC685668 | 685668 |
| 2.9885998 | up | XM_001064946 | LOC685711 | 685711 |
| 4.4952617 | up | XM_001064972 | LOC685717 | 685717 |
| 2.7023368 | up | XM_001065049 | LOC685735 | 685735 |
| 3.7006233 | up | XM_001065160 | LOC685759 | 685759 |
| 2.0263727 | up | XM_001065161 | LOC685760 | 685760 |
| 4.820369  | up | XM_001065189 | LOC685769 | 685769 |
| 4.1998515 | up | XM_001065214 | LOC685773 | 685773 |

|           |    |              |           |        |
|-----------|----|--------------|-----------|--------|
| 3.0752347 | up | XM_001057991 | LOC685779 | 685779 |
| 4.2766576 | up | XM_217497    | LOC685792 | 685792 |
| 4.426156  | up | XM_001065304 | LOC685796 | 685796 |
| 2.5597396 | up | XM_001065332 | LOC685805 | 685805 |
| 3.3229418 | up | XM_001065446 | LOC685835 | 685835 |
| 3.9396029 | up | XM_001065511 | LOC685853 | 685853 |
| 3.0753963 | up | XM_001065537 | LOC685863 | 685863 |
| 2.4187818 | up | XM_001065569 | LOC685871 | 685871 |
| 2.6854799 | up | XM_001065570 | LOC685872 | 685872 |
| 2.4857466 | up | XM_001065656 | LOC685891 | 685891 |
| 2.3342624 | up | XM_001065719 | LOC685908 | 685908 |
| 3.8729274 | up | XM_001065748 | LOC685918 | 685918 |
| 2.6050885 | up | XM_001065901 | LOC685948 | 685948 |
| 6.782266  | up | XM_001065963 | LOC685965 | 685965 |
| 3.1563735 | up | XM_001065967 | LOC685966 | 685966 |
| 2.5970976 | up | XM_001066016 | LOC685974 | 685974 |
| 3.0852597 | up | XM_001066071 | LOC685986 | 685986 |
| 2.674438  | up | XM_001066074 | LOC685987 | 685987 |
| 3.623533  | up | XM_001066079 | LOC685989 | 685989 |
| 3.1311626 | up | XM_001066107 | LOC685994 | 685994 |
| 3.4545162 | up | XM_001066158 | LOC686010 | 686010 |
| 3.193804  | up | XM_001066192 | LOC686017 | 686017 |
| 2.6174963 | up | XM_001066193 | LOC686018 | 686018 |
| 3.1956804 | up | XM_001066217 | LOC686023 | 686023 |
| 2.2065754 | up | XM_001066250 | LOC686031 | 686031 |
| 3.1735628 | up | XM_001066301 | LOC686041 | 686041 |
| 3.309122  | up | XM_001066372 | LOC686058 | 686058 |
| 2.910974  | up | XM_001066380 | LOC686061 | 686061 |
| 5.181789  | up | XM_001066470 | LOC686082 | 686082 |
| 3.8070154 | up | XM_001066478 | LOC686085 | 686085 |
| 3.3964949 | up | XM_001066607 | LOC686119 | 686119 |
| 3.7423563 | up | XM_001066636 | LOC686130 | 686130 |
| 2.6460164 | up | XM_001066637 | LOC686131 | 686131 |
| 2.1358685 | up | XM_001066698 | LOC686147 | 686147 |
| 3.0563257 | up | XM_001072947 | LOC686222 | 686222 |
| 2.2587068 | up | XM_001073659 | LOC686342 | 686342 |
| 3.9584856 | up | XM_001073953 | LOC686402 | 686402 |
| 2.1841714 | up | XM_001075122 | LOC686647 | 686647 |
| 2.6662457 | up | XM_001075396 | LOC686718 | 686718 |
| 3.2948928 | up | XM_001075397 | LOC686719 | 686719 |
| 2.0315032 | up | XM_001076338 | LOC686921 | 686921 |
| 2.6386366 | up | XM_001076379 | LOC686934 | 686934 |
| 3.3898118 | up | XM_001076692 | LOC687003 | 687003 |
| 2.5835993 | up | XM_001076767 | LOC687021 | 687021 |

|           |    |              |           |        |
|-----------|----|--------------|-----------|--------|
| 3.713098  | up | XM_001076927 | LOC687062 | 687062 |
| 4.743295  | up | XM_001076949 | LOC687067 | 687067 |
| 4.506484  | up | XM_001077135 | LOC687109 | 687109 |
| 2.021484  | up | XM_001077138 | LOC687111 | 687111 |
| 2.9060848 | up | XM_001077315 | LOC687164 | 687164 |
| 4.360078  | up | XM_001077430 | LOC687185 | 687185 |
| 2.2972953 | up | XM_001078171 | LOC687363 | 687363 |
| 2.017497  | up | XM_001078386 | LOC687401 | 687401 |
| 3.5423775 | up | XM_001078688 | LOC687464 | 687464 |
| 2.4795537 | up | XM_001078885 | LOC687512 | 687512 |
| 4.024105  | up | XM_001079008 | LOC687537 | 687537 |
| 3.3258305 | up | XM_001079286 | LOC687589 | 687589 |
| 2.141709  | up | XM_001079425 | LOC687619 | 687619 |
| 2.8015978 | up | XM_001079569 | LOC687652 | 687652 |
| 9.437647  | up | XM_001079796 | LOC687695 | 687695 |
| 5.1928735 | up | XM_001079968 | LOC687736 | 687736 |
| 3.4130542 | up | XM_001081032 | LOC688068 | 688068 |
| 2.3378341 | up | XM_001081092 | LOC688091 | 688091 |
| 2.6967735 | up | XM_001081232 | LOC688127 | 688127 |
| 3.2944028 | up | XM_001081341 | LOC688160 | 688160 |
| 4.6166177 | up | XM_001081359 | LOC688164 | 688164 |
| 2.0792835 | up | XM_001081553 | LOC688228 | 688228 |
| 3.0688634 | up | XM_001081629 | LOC688246 | 688246 |
| 3.1672816 | up | XM_001081886 | LOC688351 | 688351 |
| 2.956007  | up | XM_001081935 | LOC688377 | 688377 |
| 4.098281  | up | XM_001081948 | LOC688384 | 688384 |
| 6.6765323 | up | XM_001066775 | LOC688399 | 688399 |
| 6.2789164 | up | XM_001066825 | LOC688410 | 688410 |
| 4.449366  | up | XM_001066895 | LOC688428 | 688428 |
| 7.6754985 | up | XM_001066958 | LOC688441 | 688441 |
| 3.4063847 | up | XM_001066993 | LOC688450 | 688450 |
| 3.0382729 | up | XM_001067045 | LOC688460 | 688460 |
| 4.29556   | up | XM_001067063 | LOC688464 | 688464 |
| 3.4133735 | up | XM_001056972 | LOC688479 | 688479 |
| 2.378941  | up | XM_001067241 | LOC688519 | 688519 |
| 2.151363  | up | XM_001067313 | LOC688532 | 688532 |
| 4.011219  | up | XM_001067327 | LOC688538 | 688538 |
| 2.9315126 | up | XM_001067419 | LOC688560 | 688560 |
| 2.8522863 | up | XM_001058486 | LOC688572 | 688572 |
| 3.8058994 | up | XM_001067520 | LOC688587 | 688587 |
| 4.7494636 | up | XM_001067531 | LOC688592 | 688592 |
| 3.2666585 | up | XM_001067734 | LOC688644 | 688644 |
| 3.905089  | up | XM_001058542 | LOC688649 | 688649 |
| 4.2294264 | up | XM_001067795 | LOC688663 | 688663 |

|           |    |              |           |        |
|-----------|----|--------------|-----------|--------|
| 2.8035886 | up | XM_001067853 | LOC688678 | 688678 |
| 3.0967205 | up | XM_001058650 | LOC688679 | 688679 |
| 3.4889815 | up | XM_001058713 | LOC688687 | 688687 |
| 2.2801547 | up | XM_001067922 | LOC688690 | 688690 |
| 2.7682452 | up | XM_001068087 | LOC688732 | 688732 |
| 3.0364027 | up | XM_001068318 | LOC688793 | 688793 |
| 2.2644835 | up | XM_001068329 | LOC688798 | 688798 |
| 3.2865016 | up | XM_001068371 | LOC688803 | 688803 |
| 3.4440663 | up | XM_001068419 | LOC688818 | 688818 |
| 2.8810127 | up | XM_001068465 | LOC688825 | 688825 |
| 2.6548297 | up | XM_001068481 | LOC688831 | 688831 |
| 3.466348  | up | XM_001068669 | LOC688874 | 688874 |
| 4.367969  | up | XM_001068717 | LOC688892 | 688892 |
| 2.7676826 | up | XM_001068783 | LOC688909 | 688909 |
| 5.1428494 | up | XM_001068891 | LOC688935 | 688935 |
| 3.0228784 | up | XM_001068988 | LOC688964 | 688964 |
| 7.0195518 | up | XM_001069010 | LOC688970 | 688970 |
| 2.6729171 | up | XM_001069134 | LOC689001 | 689001 |
| 3.9325895 | up | XM_001069178 | LOC689016 | 689016 |
| 2.1123164 | up | XM_001069258 | LOC689032 | 689032 |
| 2.7775264 | up | XM_001069422 | LOC689076 | 689076 |
| 2.5475974 | up | XM_001069448 | LOC689083 | 689083 |
| 2.0508358 | up | XM_001058891 | LOC689084 | 689084 |
| 2.0377884 | up | XM_001058953 | LOC689094 | 689094 |
| 8.283908  | up | XM_001069556 | LOC689107 | 689107 |
| 2.205693  | up | XM_001069621 | LOC689124 | 689124 |
| 8.417965  | up | XM_001069756 | LOC689150 | 689150 |
| 2.8548913 | up | XM_001069925 | LOC689190 | 689190 |
| 7.518614  | up | XM_001069934 | LOC689193 | 689193 |
| 6.265004  | up | XM_001069974 | LOC689206 | 689206 |
| 2.3274813 | up | XM_001069993 | LOC689215 | 689215 |
| 4.069657  | up | XM_001070040 | LOC689225 | 689225 |
| 5.0917754 | up | XM_001070055 | LOC689228 | 689228 |
| 3.2991405 | up | XM_001070064 | LOC689231 | 689231 |
| 2.4769762 | up | XM_001070094 | LOC689241 | 689241 |
| 3.4436588 | up | XM_001070111 | LOC689244 | 689244 |
| 2.1309729 | up | XM_001070188 | LOC689268 | 689268 |
| 4.3957415 | up | XM_001070205 | LOC689270 | 689270 |
| 5.110301  | up | XM_001070335 | LOC689299 | 689299 |
| 3.3359787 | up | XM_001070367 | LOC689312 | 689312 |
| 6.058637  | up | XM_001070376 | LOC689315 | 689315 |
| 2.4716702 | up | XM_001070403 | LOC689326 | 689326 |
| 2.5243797 | up | XM_001059417 | LOC689329 | 689329 |
| 3.4421613 | up | XM_001070438 | LOC689338 | 689338 |

|           |    |              |           |        |
|-----------|----|--------------|-----------|--------|
| 5.8158975 | up | XM_001070459 | LOC689342 | 689342 |
| 2.5055    | up | XM_001054976 | LOC689347 | 689347 |
| 2.5016158 | up | XM_001070518 | LOC689362 | 689362 |
| 7.7163773 | up | XM_001070539 | LOC689368 | 689368 |
| 2.686199  | up | XM_001070689 | LOC689410 | 689410 |
| 2.1979485 | up | XM_001070729 | LOC689418 | 689418 |
| 2.5141811 | up | XM_001070788 | LOC689435 | 689435 |
| 3.9503222 | up | XM_001070864 | LOC689453 | 689453 |
| 2.6563764 | up | XM_001070948 | LOC689478 | 689478 |
| 2.0915172 | up | XM_001070998 | LOC689497 | 689497 |
| 2.4259186 | up | XM_001070999 | LOC689498 | 689498 |
| 2.2803326 | up | XM_001071038 | LOC689511 | 689511 |
| 2.6866617 | up | XM_001060123 | LOC689545 | 689545 |
| 3.154512  | up | XM_001071174 | LOC689554 | 689554 |
| 2.0190039 | up | XM_001071448 | LOC689635 | 689635 |
| 3.0517743 | up | XM_001071539 | LOC689658 | 689658 |
| 4.004074  | up | XM_001055155 | LOC689667 | 689667 |
| 2.0406084 | up | XM_001071623 | LOC689677 | 689677 |
| 2.26356   | up | XM_001071624 | LOC689678 | 689678 |
| 2.71687   | up | XM_001060291 | LOC689680 | 689680 |
| 2.1169782 | up | XM_001055335 | LOC689690 | 689690 |
| 2.9498162 | up | XM_001071675 | LOC689692 | 689692 |
| 2.2620943 | up | XM_001071797 | LOC689727 | 689727 |
| 2.0205173 | up | XM_001071809 | LOC689730 | 689730 |
| 3.0829835 | up | XM_001071817 | LOC689734 | 689734 |
| 2.5237398 | up | XM_001071877 | LOC689750 | 689750 |
| 2.6073005 | up | XM_001071886 | LOC689753 | 689753 |
| 6.1791935 | up | XM_001071936 | LOC689767 | 689767 |
| 2.140748  | up | XM_001072032 | LOC689796 | 689796 |
| 3.4269464 | up | XM_001070608 | LOC689797 | 689797 |
| 2.6058636 | up | XM_001072049 | LOC689799 | 689799 |
| 2.5797083 | up | XM_001072069 | LOC689802 | 689802 |
| 5.7846413 | up | XM_001072168 | LOC689827 | 689827 |
| 4.984366  | up | XM_001072188 | LOC689829 | 689829 |
| 2.8768764 | up | XM_001072212 | LOC689837 | 689837 |
| 2.6307254 | up | XM_001072245 | LOC689846 | 689846 |
| 8.004454  | up | XM_001072263 | LOC689850 | 689850 |
| 2.6983962 | up | XM_001072288 | LOC689857 | 689857 |
| 2.0292385 | up | XM_001060657 | LOC689870 | 689870 |
| 3.7182326 | up | XM_001072354 | LOC689878 | 689878 |
| 2.0790918 | up | XM_001069091 | LOC689927 | 689927 |
| 3.6283352 | up | XM_001072652 | LOC689948 | 689948 |
| 2.2924116 | up | XM_001072684 | LOC689957 | 689957 |
| 2.027531  | up | XM_001072685 | LOC689958 | 689958 |

|           |    |              |           |        |
|-----------|----|--------------|-----------|--------|
| 3.8236458 | up | XM_001072858 | LOC689999 | 689999 |
| 2.1842856 | up | XM_001072965 | LOC690024 | 690024 |
| 3.5577593 | up | XM_001073001 | LOC690039 | 690039 |
| 3.4780698 | up | XM_001073030 | LOC690048 | 690048 |
| 2.0633712 | up | XM_001073060 | LOC690054 | 690054 |
| 3.1267157 | up | XM_001073178 | LOC690081 | 690081 |
| 3.0257201 | up | XM_001073344 | LOC690122 | 690122 |
| 2.6645453 | up | XM_001073403 | LOC690135 | 690135 |
| 2.4316936 | up | XM_001073445 | LOC690145 | 690145 |
| 4.6462855 | up | XM_001073536 | LOC690167 | 690167 |
| 2.6609151 | up | XM_001073545 | LOC690170 | 690170 |
| 3.491554  | up | XM_001073746 | LOC690228 | 690228 |
| 3.3121543 | up | XM_001073951 | LOC690281 | 690281 |
| 3.7940319 | up | XM_001074009 | LOC690298 | 690298 |
| 2.7225764 | up | XM_001074152 | LOC690341 | 690341 |
| 4.1685853 | up | XM_001074233 | LOC690363 | 690363 |
| 4.4550753 | up | XM_001074284 | LOC690379 | 690379 |
| 2.099612  | up | XM_001074324 | LOC690395 | 690395 |
| 5.219481  | up | XM_001074336 | LOC690398 | 690398 |
| 2.5336154 | up | XM_001074345 | LOC690400 | 690400 |
| 2.9989667 | up | XM_001074400 | LOC690415 | 690415 |
| 3.4276884 | up | XM_001074459 | LOC690439 | 690439 |
| 2.4338694 | up | XM_001074469 | LOC690443 | 690443 |
| 3.978992  | up | XM_001074485 | LOC690452 | 690452 |
| 3.093233  | up | XM_001074498 | LOC690457 | 690457 |
| 3.354503  | up | XM_001074527 | LOC690467 | 690467 |
| 2.5354156 | up | XM_001074545 | LOC690474 | 690474 |
| 2.7469923 | up | XM_001074598 | LOC690490 | 690490 |
| 3.4559252 | up | XM_001074680 | LOC690523 | 690523 |
| 3.7197988 | up | XM_001074751 | LOC690542 | 690542 |
| 3.644155  | up | XM_001074825 | LOC690565 | 690565 |
| 2.531357  | up | XM_001074852 | LOC690577 | 690577 |
| 3.0684261 | up | XM_001074893 | LOC690590 | 690590 |
| 2.006835  | up | XM_001074985 | LOC690619 | 690619 |
| 2.527783  | up | XM_001075006 | LOC690626 | 690626 |
| 2.6242597 | up | XM_001075069 | LOC690643 | 690643 |
| 2.5525482 | up | XM_001075121 | LOC690659 | 690659 |
| 3.901042  | up | XM_001075162 | LOC690672 | 690672 |
| 2.4047966 | up | XM_001075284 | LOC690700 | 690700 |
| 2.9781022 | up | XM_001075303 | LOC690707 | 690707 |
| 3.8087535 | up | XM_001075438 | LOC690739 | 690739 |
| 3.7106824 | up | XM_001075495 | LOC690748 | 690748 |
| 2.5637827 | up | XM_001075604 | LOC690782 | 690782 |
| 4.0664716 | up | XM_001075725 | LOC690815 | 690815 |

|           |    |              |           |        |
|-----------|----|--------------|-----------|--------|
| 2.4743643 | up | XM_001075795 | LOC690828 | 690828 |
| 2.5553162 | up | XM_001075885 | LOC690854 | 690854 |
| 2.0747576 | up | XM_001075892 | LOC690855 | 690855 |
| 3.402658  | up | XM_001075937 | LOC690867 | 690867 |
| 4.226243  | up | XM_001075967 | LOC690874 | 690874 |
| 3.3478217 | up | XM_001076048 | LOC690892 | 690892 |
| 3.4504194 | up | XM_001076066 | LOC690896 | 690896 |
| 2.1039941 | up | XM_001076169 | LOC690924 | 690924 |
| 2.5286887 | up | XM_001076188 | LOC690929 | 690929 |
| 3.9049275 | up | XM_001076268 | LOC690947 | 690947 |
| 2.1316879 | up | XM_001076337 | LOC690969 | 690969 |
| 3.1919498 | up | XM_001076377 | LOC690977 | 690977 |
| 2.2396812 | up | XM_001076453 | LOC690998 | 690998 |
| 3.5830152 | up | XM_001076823 | LOC691094 | 691094 |
| 4.576451  | up | XM_001076856 | LOC691108 | 691108 |
| 2.3956227 | up | XM_001076889 | LOC691115 | 691115 |
| 2.8814528 | up | XM_001076891 | LOC691117 | 691117 |
| 2.0542603 | up | XM_001076976 | LOC691142 | 691142 |
| 3.0206861 | up | XM_001076998 | LOC691146 | 691146 |
| 2.9953172 | up | XM_001077250 | LOC691219 | 691219 |
| 2.9106479 | up | XM_001077260 | LOC691221 | 691221 |
| 2.4106665 | up | XM_001077347 | LOC691241 | 691241 |
| 2.1160529 | up | XM_001077501 | LOC691274 | 691274 |
| 3.1043437 | up | XM_001077529 | LOC691282 | 691282 |
| 4.805065  | up | XM_001077758 | LOC691333 | 691333 |
| 2.006458  | up | XM_001077759 | LOC691334 | 691334 |
| 3.4453483 | up | XM_001077906 | LOC691366 | 691366 |
| 3.0920975 | up | XM_001078062 | LOC691395 | 691395 |
| 4.1910596 | up | XM_001078077 | LOC691401 | 691401 |
| 2.7226617 | up | XM_001078110 | LOC691406 | 691406 |
| 2.8312266 | up | XM_001078125 | LOC691410 | 691410 |
| 2.5528908 | up | XM_001078150 | LOC691414 | 691414 |
| 5.3495955 | up | XM_001078322 | LOC691451 | 691451 |
| 2.3767042 | up | XM_001078439 | LOC691473 | 691473 |
| 3.2269053 | up | XM_001078495 | LOC691487 | 691487 |
| 3.0677173 | up | XM_001078554 | LOC691502 | 691502 |
| 4.576375  | up | XM_001078865 | LOC691569 | 691569 |
| 4.009314  | up | XM_001078898 | LOC691575 | 691575 |
| 3.2461743 | up | XM_001078899 | LOC691576 | 691576 |
| 2.4927926 | up | XM_001078931 | LOC691586 | 691586 |
| 2.9482498 | up | XM_001078958 | LOC691595 | 691595 |
| 2.010119  | up | XM_001078980 | LOC691600 | 691600 |
| 2.4639459 | up | XM_001078992 | LOC691605 | 691605 |
| 2.4732537 | up | XM_001079070 | LOC691627 | 691627 |



|           |    |              |            |        |
|-----------|----|--------------|------------|--------|
| 2.376365  | up | XM_001079096 | LOC691633  | 691633 |
| 4.3190756 | up | XM_001079224 | LOC691672  | 691672 |
| 2.6233718 | up | XM_001079285 | LOC691692  | 691692 |
| 2.7193432 | up | XM_001079331 | LOC691705  | 691705 |
| 3.102685  | up | XM_001079400 | LOC691728  | 691728 |
| 3.118619  | up | XM_001079476 | LOC691744  | 691744 |
| 2.7989008 | up | XM_001079486 | LOC691748  | 691748 |
| 2.249638  | up | XM_001079519 | LOC691754  | 691754 |
| 2.4397707 | up | XM_001079538 | LOC691760  | 691760 |
| 2.5704696 | up | XM_001079592 | LOC691773  | 691773 |
| 3.8600826 | up | XM_001079621 | LOC691784  | 691784 |
| 2.8815794 | up | XM_001079655 | LOC691793  | 691793 |
| 2.1148543 | up | XM_001079664 | LOC691795  | 691795 |
| 3.8220792 | up | XM_001079679 | LOC691800  | 691800 |
| 2.8756976 | up | XM_001079748 | LOC691818  | 691818 |
| 2.208641  | up | NM_022257    | Masp1      | 64023  |
| 2.1531305 | up | XM_001074994 | Mettl11b   | 289167 |
| 2.3390467 | up | NM_001024893 | MGC114427  | 317297 |
| 2.3170342 | up | NM_012861    | Mgmt       | 25332  |
| 2.9807434 | up | XM_001059515 | Mogat1     | 363261 |
| 2.92419   | up | XM_001063115 | Muc6       | 282586 |
| 2.0061393 | up | XM_001069193 | Neurod4    | 288821 |
| 2.2018769 | up | NM_030868    | Nov        | 81526  |
| 2.0864694 | up | NM_053611    | Nupr1      | 113900 |
| 2.8628862 | up | NM_001001388 | Olr1093    | 366844 |
| 2.2405453 | up | NM_001001092 | Olr1395    | 405986 |
| 2.1156318 | up | NM_001000957 | Olr1451    | 405306 |
| 2.1111286 | up | NM_001000772 | Olr1453    | 405047 |
| 2.0200279 | up | NM_001001115 | Olr1707    | 406014 |
| 3.1416836 | up | NM_001000410 | Olr865     | 298474 |
| 2.0306091 | up | NM_001000708 | Olr876     | 404957 |
| 2.4925346 | up | NM_001001358 | Olr883     | 288803 |
| 2.039659  | up | XM_001080669 | Ovca2      | 497954 |
| 2.1359892 | up | XM_001054954 | Pabpc112b  | 302405 |
| 3.0212991 | up | XM_001054581 | Pmepal     | 311676 |
| 2.0185883 | up | NM_001013195 | Pold4      | 361698 |
| 2.0825188 | up | NM_001025637 | Psmb10     | 291983 |
| 2.3287978 | up | NM_001013427 | Rarres2    | 297073 |
| 2.6756449 | up | XM_225620    | RGD1559615 | 291346 |
| 4.686946  | up | XM_344831    | RGD1559699 | 365132 |
| 2.669751  | up | XM_227432    | RGD1559837 | 295256 |
| 2.7126    | up | XM_001055068 | RGD1559932 | 298221 |
| 3.7759798 | up | XM_344837    | RGD1559946 | 365141 |
| 4.1497316 | up | XM_576496    | RGD1559960 | 501084 |

|           |    |              |            |        |
|-----------|----|--------------|------------|--------|
| 2.6854346 | up | XM_001074365 | RGD1559962 | 498988 |
| 2.1527157 | up | XM_219714    | RGD1559982 | 293850 |
| 3.2657053 | up | XM_001061596 | RGD1560019 | 367121 |
| 6.399465  | up | XM_574777    | RGD1560095 | 499454 |
| 2.0912526 | up | XM_227345    | RGD1560096 | 310590 |
| 7.084692  | up | XM_574775    | RGD1560135 | 499452 |
| 5.645248  | up | XM_577949    | RGD1560140 | 502469 |
| 4.5052032 | up | XM_344641    | RGD1560209 | 364800 |
| 4.4745073 | up | XM_574066    | RGD1560221 | 498780 |
| 3.5155787 | up | XM_578421    | RGD1560270 | 502920 |
| 4.844002  | up | XM_579915    | RGD1560485 | 499053 |
| 4.085121  | up | XM_579909    | RGD1560516 | 499038 |
| 2.4213412 | up | XM_001055007 | RGD1560539 | 502966 |
| 2.9080698 | up | XM_574327    | RGD1560543 | 499046 |
| 2.315347  | up | XM_578061    | RGD1560554 | 502576 |
| 4.890742  | up | XM_577908    | RGD1560555 | 502426 |
| 2.6637635 | up | XM_229665    | RGD1560570 | 302091 |
| 3.3456182 | up | XM_001078732 | RGD1560580 | 288646 |
| 4.6979766 | up | XM_001054843 | RGD1560585 | 317597 |
| 2.2537963 | up | XM_573890    | RGD1560677 | 498612 |
| 4.995419  | up | XM_577919    | RGD1560777 | 502438 |
| 4.7557235 | up | XM_577734    | RGD1560808 | 502273 |
| 2.0183775 | up | XM_001058159 | RGD1560813 | 498894 |
| 2.5029664 | up | XM_001064817 | RGD1560815 | 291550 |
| 6.5587196 | up | XM_001065293 | RGD1560825 | 685793 |
| 2.0093584 | up | XM_001074010 | RGD1560918 | 364248 |
| 3.9688377 | up | XM_577704    | RGD1560972 | 502244 |
| 5.075892  | up | XM_001054260 | RGD1561185 | 502251 |
| 2.4912045 | up | XM_576388    | RGD1561216 | 500978 |
| 6.6498294 | up | XM_001081347 | RGD1561231 | 291345 |
| 2.4297156 | up | XM_217531    | RGD1561273 | 302093 |
| 2.3062148 | up | XM_580123    | RGD1561305 | 500808 |
| 6.3571653 | up | XM_577732    | RGD1561339 | 502271 |
| 9.83149   | up | XM_574763    | RGD1561401 | 499440 |
| 3.9402776 | up | XM_001059953 | RGD1561425 | 301378 |
| 5.549834  | up | XM_577708    | RGD1561446 | 502249 |
| 7.250037  | up | XM_574061    | RGD1561493 | 498775 |
| 5.954323  | up | XM_229383    | RGD1561546 | 301899 |
| 2.1157856 | up | XM_345090    | RGD1561557 | 365547 |
| 2.3512168 | up | XM_001079552 | RGD1561654 | 295557 |
| 2.3597782 | up | XM_001054195 | RGD1561667 | 308209 |
| 2.6443114 | up | XM_577125    | RGD1561684 | 501721 |
| 2.233384  | up | XM_001060826 | RGD1561694 | 498388 |
| 2.1620195 | up | XM_001064028 | RGD1561705 | 499290 |

|           |    |              |            |        |
|-----------|----|--------------|------------|--------|
| 3.35752   | up | XM_344825    | RGD1561706 | 365122 |
| 3.7564998 | up | XM_217910    | RGD1561759 | 308183 |
| 2.2986474 | up | XM_001053629 | RGD1561828 | 679595 |
| 5.4129987 | up | XM_577947    | RGD1562058 | 502467 |
| 3.9096904 | up | XM_001076534 | RGD1562205 | 307168 |
| 3.1116505 | up | XM_578760    | RGD1562282 | 367183 |
| 2.3090267 | up | XM_577381    | RGD1562612 | 501954 |
| 2.3654335 | up | XM_001071626 | RGD1562624 | 364249 |
| 3.0283484 | up | XM_001054943 | RGD1562650 | 502965 |
| 4.383787  | up | XM_577950    | RGD1562670 | 502470 |
| 3.9736614 | up | XM_344833    | RGD1562677 | 365136 |
| 5.254635  | up | XM_574093    | RGD1562707 | 498809 |
| 3.501679  | up | XM_576389    | RGD1562714 | 500979 |
| 3.0681484 | up | XM_577935    | RGD1562893 | 502454 |
| 2.7753866 | up | XM_577932    | RGD1562919 | 502451 |
| 4.533081  | up | XM_001071176 | RGD1562931 | 502439 |
| 2.9703107 | up | XM_344812    | RGD1562948 | 365096 |
| 3.2225876 | up | XM_579906    | RGD1563107 | 499034 |
| 6.576076  | up | XM_001081417 | RGD1563149 | 502466 |
| 4.48325   | up | XM_344630    | RGD1563247 | 364781 |
| 2.8895278 | up | XM_574318    | RGD1563490 | 499025 |
| 4.7430835 | up | XM_344827    | RGD1563626 | 365125 |
| 7.1279206 | up | XM_001080342 | RGD1563723 | 502462 |
| 3.6591501 | up | XM_345920    | RGD1563738 | 367059 |
| 4.3960786 | up | XM_577701    | RGD1563741 | 502241 |
| 9.867194  | up | XM_001081170 | RGD1563747 | 499439 |
| 2.3994462 | up | XM_214327    | RGD1563748 | 290675 |
| 9.534455  | up | XM_577939    | RGD1563772 | 502458 |
| 3.3109164 | up | XM_240367    | RGD1563825 | 306366 |
| 2.546369  | up | XM_577929    | RGD1563833 | 502448 |
| 3.0685246 | up | XM_343520    | RGD1563862 | 363180 |
| 6.0969696 | up | XM_344835    | RGD1563865 | 365139 |
| 4.753726  | up | XM_577705    | RGD1564000 | 502246 |
| 2.3314047 | up | XM_001059672 | RGD1564033 | 680963 |
| 9.517638  | up | XM_574773    | RGD1564135 | 499450 |
| 3.1573648 | up | XM_573954    | RGD1564205 | 498671 |
| 2.743313  | up | XM_001079282 | RGD1564285 | 299662 |
| 3.518623  | up | XM_001072043 | RGD1564317 | 498054 |
| 2.6595776 | up | XM_001078658 | RGD1564355 | 307681 |
| 2.5580685 | up | XM_001063065 | RGD1564519 | 498072 |
| 9.169112  | up | XM_574764    | RGD1564568 | 499441 |
| 6.5566564 | up | XM_574778    | RGD1564734 | 499455 |
| 2.3039901 | up | XM_001070478 | RGD1564736 | 367932 |
| 2.5463405 | up | XM_574052    | RGD1564791 | 498766 |

|           |    |              |            |        |
|-----------|----|--------------|------------|--------|
| 4.9813733 | up | XM_577726    | RGD1564848 | 502265 |
| 6.746093  | up | XM_001076029 | RGD1564977 | 502457 |
| 6.358895  | up | XM_001071285 | RGD1565094 | 502437 |
| 3.7318435 | up | XM_001080335 | RGD1565115 | 499449 |
| 8.611178  | up | XM_001075702 | RGD1565191 | 499451 |
| 3.0094273 | up | XM_574322    | RGD1565209 | 499033 |
| 3.9128575 | up | XM_001054671 | RGD1565231 | 365140 |
| 3.288377  | up | XM_344642    | RGD1565321 | 364801 |
| 5.279063  | up | XM_001054516 | RGD1565379 | 498770 |
| 2.1669135 | up | XM_344843    | RGD1565390 | 365149 |
| 4.4486275 | up | XM_576498    | RGD1565421 | 501086 |
| 2.556705  | up | XM_343720    | RGD1565423 | 363385 |
| 3.212835  | up | XM_001068143 | RGD1565430 | 367928 |
| 5.131314  | up | XM_574776    | RGD1565550 | 499453 |
| 8.959835  | up | XM_577941    | RGD1565576 | 502460 |
| 2.21782   | up | XM_577714    | RGD1565723 | 502254 |
| 3.5661001 | up | XM_001063482 | RGD1565859 | 499291 |
| 2.653893  | up | XM_233160    | RGD1565911 | 298220 |
| 5.0033393 | up | XM_001053399 | RGD1566008 | 317604 |
| 4.5692835 | up | XM_344619    | RGD1566040 | 364759 |
| 2.2249794 | up | XM_574062    | RGD1566047 | 498776 |
| 2.0053642 | up | NM_001033060 | Rpain      | 287463 |
| 2.0323105 | up | XM_001063809 | Rragd      | 297960 |
| 2.0117478 | up | NM_001007636 | S100a1     | 295214 |
| 2.0313382 | up | NM_053681    | S100a3     | 114216 |
| 2.2619948 | up | XM_001061870 | Satl1      | 302325 |
| 2.0129664 | up | XM_001066597 | Scand1     | 362252 |
| 2.707591  | up | NM_199082    | Sectm1b    | 287884 |
| 2.3605754 | up | NM_080892    | Selenbp1   | 140927 |
| 3.0886083 | up | NM_017310    | Sema3a     | 29751  |
| 2.0369534 | up | XM_001063428 | Sesn1      | 294518 |
| 2.662554  | up | XM_001065174 | Sfrp2      | 310552 |
| 3.3846195 | up | NM_053544    | Sfrp4      | 89803  |
| 2.678362  | up | XM_217877    | Smok2a     | 292316 |
| 2.0414772 | up | XM_001058775 | Smpd4      | 303790 |
| 2.3384128 | up | XM_001058102 | Snrpg      | 681031 |
| 2.1397648 | up | XM_001057944 | Snx2       | 291464 |
| 3.4700701 | up | XM_001068302 | Sox4       | 364712 |
| 2.4041092 | up | NM_001009976 | Spetex-2A  | 364261 |
| 3.6456068 | up | NM_001011701 | Spetex-2D  | 364260 |
| 2.8843484 | up | NM_001009968 | Spetex-2F  | 316940 |
| 4.03226   | up | XM_001073572 | Spetex-2G  | 361099 |
| 3.9324453 | up | NM_001009969 | Spetex-2H  | 361008 |
| 2.4246745 | up | NM_021869    | Stx7       | 60466  |

|           |    |              |          |        |
|-----------|----|--------------|----------|--------|
| 2.0986614 | up | NM_001009618 | Sub1     | 192269 |
| 4.8174334 | up | NM_133547    | Sult1c2  | 171072 |
| 3.3346868 | up | NM_001013177 | Sult1c2a | 316153 |
| 2.3550239 | up | NM_001007605 | Svs3     | 192239 |
| 2.107874  | up | NM_175590    | Taar7e   | 294133 |
| 2.0230646 | up | XM_001067756 | Tagap    | 308097 |
| 2.1103387 | up | NM_001015008 | Tcea3    | 298559 |
| 2.2795045 | up | XM_001073003 | Tdpoz1   | 365854 |
| 2.2002795 | up | NM_001009703 | Tmed9    | 361207 |
| 2.5151005 | up | NM_001009709 | Tmem140  | 362334 |
| 2.0902395 | up | XM_001062611 | Tmem70   | 500384 |
| 2.396498  | up | NM_001008953 | V1re18   | 494299 |
| 2.4397182 | up | NM_001008946 | Vom1r29  | 494292 |
| 3.3853936 | up | XM_001053213 | Vom2r1   | 678740 |
| 2.5437665 | up | XM_218106    | Vom2r4   | 308248 |
| 2.2569673 | up | XM_001070665 | Vom2r65  | 689403 |
| 2.0599785 | up | XM_001062818 | Vpreb2   | 363830 |
| 2.1194217 | up | XM_001080583 | Vps53    | 287535 |
| 2.1313963 | up | XM_001059030 | Wnt2     | 114487 |
| 2.0093808 | up | NM_053402    | Wnt4     | 84426  |
| 3.9828842 | up | XM_001073004 | Xlr3a    | 690041 |
| 4.701024  | up | XM_001056023 | Zmynd17  | 289904 |
| 2.136492  | up | XM_001076652 | Znf575   | 308430 |

**MiR-434-3p overexpression \_vs\_ Control 2.0 fold down regulated genes**

| Fold change | Regulation | ACCESSION    | GeneSymbol | GeneID |
|-------------|------------|--------------|------------|--------|
| 2.0157707   | down       | NM_013040    | Abcc9      | 25560  |
| 4.4395676   | down       | NM_053922    | Acacb      | 116719 |
| 2.0231595   | down       | NM_013084    | Acadsb     | 25618  |
| 3.0987487   | down       | NM_172009    | Ache       | 83817  |
| 2.7171745   | down       | NM_017340    | Acox1      | 50681  |
| 2.0521078   | down       | NM_019183    | Actc1      | 29275  |
| 2.9059446   | down       | NM_031675    | Actn4      | 63836  |
| 2.3093443   | down       | NM_199230    | Acvr1b     | 29381  |
| 2.1679087   | down       | XM_001067637 | Adck2      | 312258 |
| 2.0552995   | down       | NM_031552    | Add3       | 25230  |
| 2.022554    | down       | XM_001063833 | Agbl1      | 308724 |
| 2.9907243   | down       | XM_001068488 | Ahcy11     | 362013 |
| 2.7331386   | down       | XM_001078032 | Ahnak      | 191572 |
| 2.9400535   | down       | XM_001077954 | Aif11      | 362107 |
| 2.0304124   | down       | NM_001011974 | Akap2      | 298024 |
| 2.9877937   | down       | NM_033230    | Akt1       | 24185  |
| 3.2727547   | down       | NM_017093    | Akt2       | 25233  |

|           |      |              |          |        |
|-----------|------|--------------|----------|--------|
| 2.254635  | down | NM_031010    | Alox15   | 81639  |
| 2.4924178 | down | XM_001062954 | Amfr     | 361367 |
| 2.2336266 | down | XM_001056974 | Amot     | 300289 |
| 4.5548353 | down | NM_031544    | Ampd3    | 25095  |
| 3.7188325 | down | NM_133569    | Angptl2  | 171100 |
| 2.8204174 | down | XM_342337    | Ank2     | 362036 |
| 2.1577528 | down | NM_053714    | Ankh     | 114506 |
| 3.4566061 | down | NM_013220    | Ankrd1   | 27064  |
| 2.0516331 | down | NM_001012148 | Ankrd13a | 360823 |
| 3.2760317 | down | XM_001055096 | Ankrd2   | 309374 |
| 2.2958615 | down | XM_001056748 | Ankrd23  | 316330 |
| 2.2298198 | down | XM_001066475 | Ano1     | 309135 |
| 2.1787488 | down | NM_001014255 | Aph1a    | 365872 |
| 2.5272114 | down | NM_012778    | Aqp1     | 25240  |
| 3.0224397 | down | NM_001012032 | Arhgap24 | 305156 |
| 3.2634416 | down | NM_001007005 | Arhgdia  | 360678 |
| 2.2052927 | down | NM_001005565 | Arhgef6  | 363509 |
| 2.1500762 | down | NM_207165    | Arl10    | 306767 |
| 2.2495475 | down | NM_001009455 | Armc5    | 361653 |
| 2.0812266 | down | XM_001071122 | Armc6    | 306352 |
| 3.19201   | down | NM_012780    | Arnt     | 25242  |
| 2.5981114 | down | XM_001074246 | Ash1l    | 310638 |
| 2.3158536 | down | NM_013113    | Atp1b1   | 25650  |
| 2.1672573 | down | NM_012507    | Atp1b2   | 24214  |
| 2.15615   | down | NM_017290    | Atp2a2   | 29693  |
| 3.2743301 | down | NM_031604    | Atp6v0a1 | 29757  |
| 2.4691823 | down | NM_001009539 | B4galt3  | 494342 |
| 2.7381532 | down | NM_001011936 | Bag3     | 293524 |
| 2.0126724 | down | NM_212462    | Bat2     | 294250 |
| 4.324102  | down | XM_001080943 | Best3    | 314847 |
| 3.0631297 | down | NM_133582    | Blcap    | 171113 |
| 2.0410476 | down | XM_001061326 | Bsdcl    | 297890 |
| 2.4812295 | down | NM_001013185 | Cabc1    | 360887 |
| 2.6874948 | down | NM_012920    | Camk2a   | 25400  |
| 2.0116816 | down | NM_001042354 | Camk2b   | 24245  |
| 2.0862088 | down | NM_012519    | Camk2d   | 24246  |
| 2.00433   | down | XM_001079889 | Camta2   | 287462 |
| 2.3629408 | down | NM_019152    | Capn1    | 29153  |
| 2.0281074 | down | XM_001052977 | Caprin1  | 362173 |
| 2.5880685 | down | NM_001030041 | Carm1    | 363026 |
| 2.1792564 | down | NM_147144    | Casc3    | 259170 |
| 2.5460916 | down | XM_001081695 | Caskin2  | 303678 |
| 2.1301687 | down | NM_017131    | Casq2    | 29209  |
| 3.0259922 | down | XM_001054087 | Ccdc109a | 294560 |

|           |      |              |         |        |
|-----------|------|--------------|---------|--------|
| 2.0924473 | down | NM_001080151 | Ccdc21  | 362622 |
| 2.112702  | down | NM_001014061 | Ccdc91  | 312863 |
| 2.10346   | down | XM_001061914 | Cd163   | 312701 |
| 2.6131516 | down | NM_012752    | Cd24    | 25145  |
| 4.048762  | down | NM_001012164 | Cd97    | 361383 |
| 2.2469764 | down | XM_228203    | Cdc216  | 309804 |
| 2.0928333 | down | XM_001057656 | Cdh5    | 307618 |
| 13.018074 | down | NM_080782    | Cdkn1a  | 114851 |
| 3.2872384 | down | NM_001014097 | Cdv3    | 315970 |
| 2.0057075 | down | XM_001081194 | Cenpb   | 362217 |
| 2.4095623 | down | XM_001058641 | Chd2    | 308738 |
| 2.1201797 | down | NM_024139    | Chp     | 64152  |
| 2.4877882 | down | XM_001059575 | Chrd    | 117275 |
| 5.023558  | down | NM_019145    | Chrng   | 25753  |
| 2.349006  | down | XM_001053715 | Clasp1  | 304740 |
| 2.0957475 | down | NM_053363    | Clcn3   | 84360  |
| 2.0344222 | down | NM_022198    | Clcn4-2 | 60586  |
| 2.1788273 | down | NM_031818    | Clic4   | 83718  |
| 2.8674033 | down | NM_001002022 | Clint1  | 360515 |
| 2.674918  | down | XM_001076134 | Col4a2  | 306628 |
| 2.6228151 | down | XM_001068252 | Col6a3  | 367313 |
| 2.4325054 | down | NM_173303    | Cox6c1  | 286962 |
| 2.408513  | down | XM_001064017 | Cpeb4   | 303010 |
| 2.006819  | down | NM_019302    | Crk     | 54245  |
| 2.3598657 | down | NM_057144    | Csrp3   | 117505 |
| 2.039621  | down | XM_001053648 | Ctps    | 313560 |
| 2.4962661 | down | NM_021868    | Ctnn    | 60465  |
| 2.2306993 | down | XM_001079353 | Cyb5d1  | 363629 |
| 2.0155656 | down | NM_138877    | Cyb5r3  | 25035  |
| 2.0743167 | down | NM_001014164 | Cybasc3 | 361729 |
| 3.4897575 | down | XM_001074892 | Dag1    | 114489 |
| 2.613898  | down | NM_001009686 | Dcaf11  | 305895 |
| 3.0845237 | down | NM_053404    | Dctn4   | 84428  |
| 2.7038054 | down | XM_001068407 | Dda1    | 688813 |
| 2.5610852 | down | NM_001012345 | Dgat2   | 252900 |
| 2.4540606 | down | XM_001081462 | Dhx58   | 303538 |
| 2.6752222 | down | NM_001006981 | Dlst    | 299201 |
| 2.408337  | down | NM_001005246 | Dmd     | 24907  |
| 5.293943  | down | XM_001066025 | Dmpk    | 308405 |
| 2.6779027 | down | NM_001025411 | Dnaja4  | 300721 |
| 3.369737  | down | XM_001061825 | Dnajb5  | 313811 |
| 2.1354055 | down | NM_013199    | Dnm2    | 25751  |
| 2.0241542 | down | XM_001057815 | Dupd1   | 361003 |
| 2.0517015 | down | XM_001064583 | Dusp10  | 63995  |

|           |      |              |            |        |
|-----------|------|--------------|------------|--------|
| 2.340322  | down | NM_031820    | Dvl1       | 83721  |
| 2.1390088 | down | NM_053596    | Ece1       | 94204  |
| 2.1924262 | down | NM_012660    | Eef1a2     | 24799  |
| 4.412796  | down | NM_012551    | Egr1       | 24330  |
| 2.0820165 | down | XM_001074569 | Ehd1       | 293692 |
| 2.819918  | down | NM_001025660 | Ei24       | 300514 |
| 2.6495502 | down | XM_001062415 | Eif4g2-ps2 | 308446 |
| 2.008494  | down | NM_001033681 | Eif5a      | 287444 |
| 2.0373385 | down | XM_001070626 | Ell        | 306347 |
| 2.2154837 | down | XM_001080308 | Enpep      | 64017  |
| 3.2331913 | down | XM_001068428 | Enpp4      | 301261 |
| 2.861715  | down | NM_203336    | Esrrg      | 360896 |
| 2.0182095 | down | XM_001068194 | Ewsr1      | 289752 |
| 2.6711595 | down | XM_001059758 | Eya1       | 502935 |
| 2.000845  | down | XM_001054174 | Eya4       | 292172 |
| 2.1226408 | down | XM_001081456 | Ezh1       | 303547 |
| 2.2748163 | down | NM_053445    | Fads1      | 84575  |
| 2.2884145 | down | NM_173137    | Fads3      | 286922 |
| 2.3765354 | down | XM_001057799 | Fam134a    | 363252 |
| 2.0708854 | down | XM_001071695 | Fam189b    | 310640 |
| 2.5292027 | down | XM_001063835 | Fbxw11     | 303024 |
| 2.1894717 | down | NM_024146    | Fgfr1      | 79114  |
| 3.0932035 | down | NM_001033926 | Fhl1       | 25177  |
| 5.040366  | down | XM_001056311 | Fhl3       | 313582 |
| 2.2691858 | down | NM_001014120 | Fkbp10     | 360627 |
| 6.957848  | down | XM_001061717 | Flnc       | 362332 |
| 2.4400327 | down | XM_001070746 | Fndc3a     | 306022 |
| 2.1024334 | down | XM_001057133 | Fndc3b     | 294925 |
| 2.1183698 | down | NM_133527    | Folr1      | 171049 |
| 2.1585858 | down | NM_022197    | Fos        | 314322 |
| 2.7999067 | down | XM_001055972 | Foxd4      | 252886 |
| 3.4057667 | down | XM_001074052 | Foxj3      | 313554 |
| 2.63487   | down | XM_001065012 | Foxn3      | 314374 |
| 2.294917  | down | XM_001062337 | Fsd2       | 308779 |
| 2.1211357 | down | NM_001039337 | Fubp3      | 362106 |
| 2.130813  | down | XM_001079469 | Fxr2       | 287433 |
| 2.1940057 | down | NM_022008    | Fxyd7      | 63848  |
| 3.1590736 | down | NM_001009632 | G0s2       | 289388 |
| 2.048305  | down | NM_199118    | Gaa        | 367562 |
| 3.21024   | down | NM_001017486 | Gbas       | 498174 |
| 3.1502433 | down | XM_001066196 | Gbf1       | 309451 |
| 2.1029053 | down | NM_017088    | Gdi1       | 25183  |
| 2.582242  | down | NM_001011994 | Gga1       | 300066 |
| 2.9360895 | down | NM_031814    | Git1       | 83709  |



|           |      |              |          |        |
|-----------|------|--------------|----------|--------|
| 2.2183626 | down | NM_017211    | Glg1     | 29476  |
| 2.1453307 | down | XM_001065857 | GlT25d1  | 290637 |
| 2.5554016 | down | NM_172335    | Gm2a     | 282838 |
| 2.0562377 | down | NM_001013119 | Gna13    | 303634 |
| 2.8366694 | down | NM_001011989 | Gns      | 299825 |
| 2.0235262 | down | XM_001062460 | Golim4   | 310526 |
| 2.3761907 | down | NM_013177    | Got2     | 25721  |
| 3.129917  | down | NM_030828    | Gpc1     | 58920  |
| 3.3112435 | down | NM_022215    | Gpd1     | 60666  |
| 2.0151246 | down | XM_001074228 | Gpihbp1  | 300027 |
| 2.4728868 | down | NM_031039    | Gpt      | 81670  |
| 2.9110298 | down | NM_001012057 | Gpt2     | 307759 |
| 2.5342813 | down | NM_001009920 | Gsta5    | 494500 |
| 2.1495667 | down | XM_574740    | Gstt3    | 499422 |
| 2.344897  | down | XM_001058711 | Gtpbp2   | 363195 |
| 4.478064  | down | XM_001076928 | Gys1     | 690987 |
| 2.0419738 | down | NM_001079940 | Habp4    | 361196 |
| 4.8743625 | down | NM_012945    | Hbegf    | 25433  |
| 3.114225  | down | NM_019387    | Hgs      | 56084  |
| 2.0916438 | down | XM_001072438 | Hip1r    | 81917  |
| 3.6266866 | down | XM_001066707 | Hipk2    | 362342 |
| 3.5429852 | down | NM_001080783 | Hisppd2a | 311355 |
| 2.0765824 | down | NM_024137    | Hivep2   | 29721  |
| 2.9080527 | down | NM_012735    | Hk2      | 25059  |
| 2.5211995 | down | NM_012580    | Hmox1    | 24451  |
| 2.138936  | down | XM_001076759 | Hnrnp112 | 311776 |
| 2.2944856 | down | NM_138887    | Hspb6    | 192245 |
| 23.174852 | down | XM_001072790 | Hspb7    | 50565  |
| 2.0007193 | down | XM_341259    | Hspc159  | 360983 |
| 2.7245631 | down | NM_031721    | Htra1    | 65164  |
| 2.386734  | down | XM_001075074 | Ints3    | 361988 |
| 2.3744712 | down | NM_001033691 | Irf7     | 293624 |
| 2.6328511 | down | XM_001059353 | Itga6    | 114517 |
| 2.6188107 | down | XM_001069915 | Itgb1bp2 | 317258 |
| 3.6116076 | down | NM_001004263 | Itgb6    | 311061 |
| 2.0157993 | down | XM_001058872 | Itpk1    | 500709 |
| 2.034496  | down | NM_021835    | Jun      | 24516  |
| 2.3735986 | down | NM_013186    | Kcnb1    | 25736  |
| 2.3448172 | down | NM_031358    | Kcnj11   | 83535  |
| 2.5191863 | down | NM_031828    | Kcnma1   | 83731  |
| 2.1655066 | down | NM_133602    | Khsrp    | 171137 |
| 2.3750033 | down | XM_001058501 | Kif13a   | 308173 |
| 2.628528  | down | NM_053486    | Kif3c    | 85248  |
| 2.0068946 | down | XM_214331    | Klhl2    | 290692 |

|           |      |              |           |        |
|-----------|------|--------------|-----------|--------|
| 2.667188  | down | XM_001065835 | Larp5     | 307070 |
| 2.9186301 | down | XM_001060474 | Lclat1    | 362702 |
| 2.7838018 | down | XM_001058773 | Ldb1      | 309447 |
| 2.8179986 | down | XM_001059372 | Ldb3      | 498587 |
| 2.4149106 | down | NM_012595    | Ldhb      | 24534  |
| 2.2234929 | down | XM_001056203 | Leng4     | 308309 |
| 2.2909951 | down | NM_020099    | Leprot    | 56766  |
| 2.034387  | down | NM_139096    | Lgals3bp  | 245955 |
| 2.3528314 | down | NM_012977    | Lgals9    | 25476  |
| 2.2010205 | down | XM_001078972 | Limd1     | 316101 |
| 2.358569  | down | NM_152844    | Llgl1     | 54265  |
| 2.3238568 | down | XM_001076072 | Lmcd1     | 494021 |
| 2.031095  | down | NM_001079939 | Lmf2      | 315218 |
| 2.3398912 | down | XM_001076027 | Lmnb2     | 299625 |
| 2.4541237 | down | NM_001013853 | LOC287167 | 287167 |
| 4.6755524 | down | XM_001054688 | LOC291746 | 291746 |
| 2.7550628 | down | XM_001054611 | LOC292662 | 292662 |
| 2.5687125 | down | XM_001066983 | LOC297826 | 297826 |
| 2.904464  | down | XM_001059270 | LOC298016 | 298016 |
| 2.7751424 | down | XM_001054228 | LOC300481 | 300481 |
| 4.1906    | down | NM_001037190 | LOC303448 | 303448 |
| 2.1238563 | down | XM_001080824 | LOC360570 | 360570 |
| 3.103765  | down | XM_001062239 | LOC363737 | 363737 |
| 3.0002496 | down | XM_001065988 | LOC363903 | 363903 |
| 2.2282526 | down | XM_001064135 | LOC365219 | 365219 |
| 2.4618766 | down | XM_001077769 | LOC365559 | 365559 |
| 3.2929974 | down | XM_001058386 | LOC366068 | 366068 |
| 2.652297  | down | XM_345916    | LOC367050 | 367050 |
| 3.2863681 | down | XM_001071580 | LOC367619 | 367619 |
| 2.6587489 | down | XM_001076383 | LOC499235 | 499235 |
| 4.9598417 | down | XM_001078222 | LOC499718 | 499718 |
| 3.2913065 | down | XM_001053584 | LOC499996 | 499996 |
| 2.081605  | down | XM_001073134 | LOC500912 | 500912 |
| 2.2035077 | down | NM_001033072 | LOC500959 | 500959 |
| 2.4369524 | down | XM_577408    | LOC501979 | 501979 |
| 3.1223638 | down | XM_001063944 | LOC502111 | 502111 |
| 5.959818  | down | XM_001057051 | LOC502730 | 502730 |
| 2.1178854 | down | XM_001071495 | LOC503366 | 503366 |
| 2.3183012 | down | XM_001072828 | LOC503393 | 503393 |
| 3.6563525 | down | XM_578947    | LOC503408 | 503408 |
| 4.238234  | down | XM_001053228 | LOC678801 | 678801 |
| 2.049402  | down | XM_001053911 | LOC678938 | 678938 |
| 3.063879  | down | XM_001054963 | LOC679221 | 679221 |
| 2.6705477 | down | XM_001053597 | LOC679586 | 679586 |

|           |      |              |           |        |
|-----------|------|--------------|-----------|--------|
| 3.8458772 | down | XM_001053642 | LOC679597 | 679597 |
| 2.6281538 | down | XM_001054023 | LOC679685 | 679685 |
| 2.582184  | down | XM_001054040 | LOC679690 | 679690 |
| 2.735436  | down | XM_001054162 | LOC679715 | 679715 |
| 3.4197164 | down | XM_001054617 | LOC679826 | 679826 |
| 2.8781424 | down | XM_001054952 | LOC679920 | 679920 |
| 2.443848  | down | XM_001055503 | LOC680026 | 680026 |
| 2.134029  | down | XM_001055430 | LOC680036 | 680036 |
| 2.7055907 | down | XM_001056856 | LOC680363 | 680363 |
| 2.996659  | down | XM_001056928 | LOC680379 | 680379 |
| 3.252572  | down | XM_001057008 | LOC680393 | 680393 |
| 3.5817363 | down | XM_001057446 | LOC680499 | 680499 |
| 2.351425  | down | XM_001058190 | LOC680654 | 680654 |
| 2.6328077 | down | XM_001058388 | LOC680688 | 680688 |
| 3.90397   | down | XM_001058740 | LOC680755 | 680755 |
| 3.0433936 | down | XM_001058966 | LOC680805 | 680805 |
| 2.3900487 | down | XM_001059174 | LOC680848 | 680848 |
| 2.0174477 | down | XM_001060542 | LOC681153 | 681153 |
| 2.151028  | down | XM_001060556 | LOC681160 | 681160 |
| 5.109977  | down | XM_001060821 | LOC681222 | 681222 |
| 2.0849721 | down | XM_001061373 | LOC681354 | 681354 |
| 3.3148615 | down | XM_001058015 | LOC681699 | 681699 |
| 2.8943806 | down | XM_001058263 | LOC681754 | 681754 |
| 3.4369864 | down | XM_001058730 | LOC681858 | 681858 |
| 2.4786444 | down | XM_001058855 | LOC681893 | 681893 |
| 2.1434271 | down | XM_001060977 | LOC682316 | 682316 |
| 2.406557  | down | XM_001062491 | LOC682653 | 682653 |
| 3.3645396 | down | XM_001063246 | LOC682818 | 682818 |
| 2.0239916 | down | XM_001063578 | LOC682891 | 682891 |
| 3.8154705 | down | XM_001064668 | LOC683146 | 683146 |
| 3.2716873 | down | XM_001065484 | LOC683336 | 683336 |
| 2.4642944 | down | XM_001070523 | LOC683342 | 683342 |
| 2.1355946 | down | XM_001065874 | LOC683420 | 683420 |
| 2.2711065 | down | XM_001065932 | LOC683435 | 683435 |
| 2.36783   | down | XM_001065985 | LOC683447 | 683447 |
| 2.3440478 | down | XM_001066111 | LOC683479 | 683479 |
| 3.2119803 | down | XM_001066181 | LOC683494 | 683494 |
| 2.831613  | down | XM_001066577 | LOC683573 | 683573 |
| 2.557338  | down | XM_001067070 | LOC683689 | 683689 |
| 4.2173586 | down | XM_001053482 | LOC683761 | 683761 |
| 2.2830844 | down | XM_001064232 | LOC683788 | 683788 |
| 2.3330104 | down | XM_001068630 | LOC684035 | 684035 |
| 2.0067234 | down | XM_001069378 | LOC684202 | 684202 |
| 2.8819327 | down | XM_001069774 | LOC684297 | 684297 |

|           |      |              |           |        |
|-----------|------|--------------|-----------|--------|
| 5.0293927 | down | XM_001069904 | LOC684333 | 684333 |
| 2.3754933 | down | XM_001070490 | LOC684352 | 684352 |
| 3.3041024 | down | XM_001070213 | LOC684399 | 684399 |
| 3.461679  | down | XM_001072008 | LOC684806 | 684806 |
| 3.5378366 | down | XM_001063592 | LOC685387 | 685387 |
| 2.6635602 | down | XM_001064406 | LOC685580 | 685580 |
| 2.4523764 | down | XM_001065305 | LOC685797 | 685797 |
| 2.688678  | down | XM_001065503 | LOC685851 | 685851 |
| 2.5693204 | down | XM_001066160 | LOC686011 | 686011 |
| 3.9118657 | down | XM_001072758 | LOC686172 | 686172 |
| 2.2749832 | down | XM_001075155 | LOC686658 | 686658 |
| 2.0496838 | down | XM_001076367 | LOC686931 | 686931 |
| 3.9322348 | down | XM_001079384 | LOC687610 | 687610 |
| 2.3016253 | down | XM_001079878 | LOC687713 | 687713 |
| 2.19288   | down | XM_001080031 | LOC687759 | 687759 |
| 2.165977  | down | XM_001080804 | LOC687991 | 687991 |
| 2.5332327 | down | XM_001080924 | LOC688029 | 688029 |
| 3.2382755 | down | XM_001081883 | LOC688349 | 688349 |
| 2.0921755 | down | XM_001066874 | LOC688424 | 688424 |
| 2.1054313 | down | XM_001066030 | LOC688462 | 688462 |
| 2.1348352 | down | XM_001067817 | LOC688667 | 688667 |
| 2.2238567 | down | XM_001068479 | LOC688829 | 688829 |
| 4.479032  | down | XM_001070462 | LOC689343 | 689343 |
| 4.413225  | down | XM_001070764 | LOC689427 | 689427 |
| 2.523     | down | XM_001070770 | LOC689428 | 689428 |
| 2.9251237 | down | XM_001071429 | LOC689628 | 689628 |
| 2.2046938 | down | XM_001071836 | LOC689741 | 689741 |
| 3.706674  | down | XM_001072404 | LOC689891 | 689891 |
| 2.089512  | down | XM_001072820 | LOC689989 | 689989 |
| 2.028385  | down | XM_001073955 | LOC690000 | 690000 |
| 2.0863266 | down | XM_001073272 | LOC690103 | 690103 |
| 3.0376253 | down | XM_001075530 | LOC690761 | 690761 |
| 4.230433  | down | XM_001072433 | LOC691098 | 691098 |
| 2.1238127 | down | XM_001077205 | LOC691204 | 691204 |
| 3.0429158 | down | XM_001077221 | LOC691211 | 691211 |
| 2.908142  | down | XM_001077271 | LOC691224 | 691224 |
| 2.7685645 | down | XM_001077366 | LOC691245 | 691245 |
| 2.1615086 | down | XM_001079338 | LOC691708 | 691708 |
| 2.1791866 | down | XM_001080361 | LOC691960 | 691960 |
| 2.4274585 | down | NM_001012189 | Lpcat3    | 362434 |
| 3.1072745 | down | NM_012598    | Lpl       | 24539  |
| 2.062748  | down | XM_001070537 | Lrrc25    | 498605 |
| 2.4408135 | down | NM_001008280 | Lrrc59    | 287633 |
| 2.0914018 | down | NM_001017467 | Ly6e      | 362934 |

|           |      |              |          |        |
|-----------|------|--------------|----------|--------|
| 2.8753772 | down | NM_001008319 | Maea     | 298982 |
| 2.499425  | down | NM_145673    | Mafk     | 246760 |
| 2.0529912 | down | NM_030995    | Map1a    | 25152  |
| 2.5211537 | down | NM_053703    | Map2k6   | 114495 |
| 3.5694008 | down | XM_001081582 | Map3k3   | 303604 |
| 2.048856  | down | NM_001005556 | Mavs     | 311430 |
| 2.0224288 | down | NM_001024996 | Mblac1   | 304346 |
| 2.3595693 | down | XM_001062557 | Mbnl1    | 282635 |
| 3.4273758 | down | NM_001014035 | Mef2a    | 309957 |
| 2.3847256 | down | NM_001040186 | Mfge8    | 25277  |
| 2.0067844 | down | XM_001063359 | Mfsd6    | 301388 |
| 2.881787  | down | NM_001007751 | MGC94207 | 362946 |
| 4.1508417 | down | NM_001013964 | Mgrn1    | 302938 |
| 2.0359304 | down | XM_215562    | Mgst2    | 295037 |
| 3.3430097 | down | XM_001074357 | Mical2   | 365352 |
| 2.544309  | down | NM_134399    | Mk1      | 171436 |
| 3.2678561 | down | XM_001059647 | Mll5     | 311968 |
| 2.7390385 | down | XM_001061133 | Mpp3     | 114202 |
| 2.0625107 | down | XM_001056335 | Mreg     | 501162 |
| 4.720925  | down | NM_030863    | Msn      | 81521  |
| 2.37339   | down | NM_022588    | Mta1     | 64520  |
| 2.4164085 | down | XM_001059230 | Mtmr1    | 317296 |
| 3.6082273 | down | XM_001055709 | Murc     | 313225 |
| 2.16103   | down | XM_001067239 | Mut      | 688517 |
| 2.0857453 | down | NM_031063    | Mvk      | 81727  |
| 2.6358612 | down | NM_173096    | Mx1      | 24575  |
| 2.4955485 | down | NM_134350    | Mx2      | 286918 |
| 2.6472802 | down | NM_183332    | Myadm    | 369016 |
| 16.525509 | down | NM_017240    | Myh7     | 29557  |
| 3.226564  | down | XM_001078049 | Myh8     | 252942 |
| 2.0340161 | down | NM_013194    | Myh9     | 25745  |
| 8.329767  | down | NM_012606    | Myl3     | 24585  |
| 2.757478  | down | XM_239684    | Myo18b   | 304551 |
| 2.5701942 | down | NM_023092    | Myo1c    | 65261  |
| 2.054862  | down | NM_176079    | Myod1    | 337868 |
| 3.4736204 | down | XM_001075328 | Myoz2    | 295426 |
| 2.1471794 | down | XM_001080508 | Mypn     | 309760 |
| 2.0209382 | down | XM_001063777 | Myst3    | 306571 |
| 2.080869  | down | NM_001024765 | Nbr1     | 303554 |
| 2.0496933 | down | NM_133320    | Ndel1    | 170845 |
| 2.1773753 | down | XM_216878    | Nedd1    | 299730 |
| 4.017796  | down | XM_001057566 | Nek9     | 299204 |
| 2.0575132 | down | NM_012988    | Nfia     | 25492  |
| 2.211351  | down | XM_001056399 | Nfrkb    | 315523 |

|           |      |              |          |        |
|-----------|------|--------------|----------|--------|
| 2.455029  | down | NM_080577    | Nploc4   | 140639 |
| 2.3020527 | down | NM_012613    | Npr1     | 24603  |
| 2.1434264 | down | NM_013131    | Nr3c2    | 25672  |
| 2.4721563 | down | NM_024388    | Nr4a1    | 79240  |
| 2.8878407 | down | XM_001056969 | Nrbp2    | 680451 |
| 2.7377768 | down | NM_207607    | Ns5atp4  | 311934 |
| 2.1663113 | down | NM_001034152 | Nsg2     | 497878 |
| 2.7653756 | down | NM_053463    | Nucb1    | 84595  |
| 2.4080863 | down | XM_001068048 | Numa1    | 308870 |
| 2.1224606 | down | NM_053322    | Nup210   | 58958  |
| 2.9780726 | down | XM_001076876 | Obscn    | 338458 |
| 2.2627285 | down | XM_001077384 | Odf3l2   | 299600 |
| 2.0455365 | down | NM_017107    | Ogt      | 26295  |
| 2.0298595 | down | NM_001000853 | Olr803   | 405143 |
| 2.6856673 | down | NM_001047897 | Ormdl3   | 360618 |
| 2.518035  | down | NM_001013079 | Osbp12   | 296461 |
| 2.1005802 | down | XM_001074167 | Otud1    | 498803 |
| 2.4003084 | down | NM_080780    | P2rx5    | 113995 |
| 2.5961835 | down | NM_012998    | P4hb     | 25506  |
| 2.0322366 | down | NM_001008328 | Parp3    | 300985 |
| 2.2188487 | down | NM_001002828 | Pbx2     | 406164 |
| 2.9202118 | down | XM_001071111 | Pcbp4    | 363133 |
| 2.0463147 | down | NM_031077    | Pctk1    | 81741  |
| 2.9018579 | down | NM_145085    | Pcyox1   | 246302 |
| 2.2478485 | down | NM_022236    | Pde10a   | 63885  |
| 2.0428839 | down | NM_001004072 | Pdha1    | 29554  |
| 4.259142  | down | NM_030872    | Pdk2     | 81530  |
| 2.1823444 | down | NM_001013231 | Pea15a   | 364052 |
| 2.4806743 | down | XM_001059705 | Phc2     | 313038 |
| 2.7798004 | down | NM_022626    | Phka1    | 64561  |
| 2.3866038 | down | NM_001014152 | Phkb     | 361377 |
| 2.257644  | down | XM_001054196 | Pik3ap1  | 294048 |
| 2.3121724 | down | NM_001042505 | Pitx2    | 54284  |
| 2.5185435 | down | NM_001005560 | Pla2g6   | 360426 |
| 2.451639  | down | NM_001009353 | Pla2g7   | 301265 |
| 3.5024602 | down | NM_022401    | Plec     | 64204  |
| 2.1088047 | down | XM_001055776 | Plekhb2  | 301337 |
| 2.7119007 | down | NM_053827    | Plod1    | 116552 |
| 2.0071428 | down | XM_001062456 | Pnpla2   | 361676 |
| 2.4227262 | down | XM_001059753 | Pnpla7   | 246246 |
| 2.8999317 | down | XM_001079162 | Polr2a   | 363633 |
| 2.1128905 | down | NM_001007747 | Pomgnt1  | 362567 |
| 2.0795076 | down | NM_031576    | Por      | 29441  |
| 2.7025092 | down | NM_031347    | Ppargc1a | 83516  |

|           |      |              |            |        |
|-----------|------|--------------|------------|--------|
| 2.3407729 | down | XM_001066863 | Ppme1      | 361613 |
| 2.2434025 | down | NM_212542    | Ppp1r11    | 294207 |
| 2.7960105 | down | NM_017309    | Ppp3r1     | 29748  |
| 2.0818691 | down | NM_031729    | Ppp5c      | 65179  |
| 2.556138  | down | XM_001079551 | Pptc7      | 304488 |
| 2.5891328 | down | NM_023991    | Prkaa2     | 78975  |
| 2.3417401 | down | XM_001072411 | Prkaca     | 25636  |
| 2.4199011 | down | NM_001077645 | Prkacb     | 293508 |
| 2.342025  | down | NM_001007697 | Prune      | 310664 |
| 2.0590498 | down | XM_001076023 | Pskh1      | 364993 |
| 2.8918896 | down | XM_001055737 | Ptpn3      | 362524 |
| 3.4934504 | down | NM_019140    | Ptprs      | 25529  |
| 2.2159429 | down | NM_001012147 | Pxn        | 360820 |
| 3.8704295 | down | XM_001056644 | R3hdm2     | 362894 |
| 2.7686763 | down | NM_001008370 | Rab1b-ps1  | 361706 |
| 3.1703956 | down | NM_013018    | Rab3a      | 25531  |
| 2.0310347 | down | XM_001072217 | Rabgef1    | 360797 |
| 2.3944821 | down | XM_001061761 | Rab13      | 360720 |
| 2.0885766 | down | XM_343471    | Rad54l2    | 363135 |
| 2.322015  | down | XM_001069856 | Rapgef2    | 310533 |
| 2.0543914 | down | XM_001060956 | Rapgef4    | 252857 |
| 2.2197084 | down | XM_001074931 | Rassf8     | 312846 |
| 2.1535063 | down | NM_021764    | Rbck1      | 60383  |
| 2.6769733 | down | XM_001073426 | Rbm24      | 690139 |
| 2.4202452 | down | XM_001054287 | Rbm38      | 366262 |
| 3.0273027 | down | NM_001005882 | Rbm47      | 305340 |
| 2.059981  | down | XM_001053333 | Rc3h2      | 311909 |
| 2.200579  | down | XM_001071544 | Rcsd1      | 360872 |
| 2.2184396 | down | NM_199208    | Rdh2       | 299511 |
| 2.072556  | down | NM_001013218 | Reep6      | 362835 |
| 2.5001817 | down | XM_001080107 | Rfc5       | 304528 |
| 2.2950673 | down | XM_001057069 | RGD1305455 | 288545 |
| 2.0475929 | down | XM_001067947 | RGD1305793 | 309456 |
| 3.5532267 | down | XM_001078821 | RGD1306074 | 296601 |
| 2.2781284 | down | XM_001073356 | RGD1306484 | 363594 |
| 2.0834305 | down | XM_001077056 | RGD1307067 | 362840 |
| 2.0136478 | down | NM_001014190 | RGD1307218 | 362518 |
| 5.607524  | down | XM_001080615 | RGD1307222 | 303300 |
| 2.6712885 | down | XM_001077827 | RGD1307615 | 362084 |
| 3.4033272 | down | XM_001058624 | RGD1309492 | 314330 |
| 2.1123004 | down | XM_001068567 | RGD1309821 | 366360 |
| 2.2639506 | down | XM_001065132 | RGD1310587 | 360894 |
| 2.388834  | down | XM_001081569 | RGD1311429 | 360642 |
| 2.4418674 | down | XM_001059424 | RGD1311783 | 294012 |

|           |      |              |            |        |
|-----------|------|--------------|------------|--------|
| 4.9539375 | down | XM_001072259 | RGD1559590 | 303889 |
| 2.2854726 | down | XM_001075526 | RGD1559682 | 361080 |
| 2.8192265 | down | XM_001057559 | RGD1559704 | 499433 |
| 2.952845  | down | XM_001078945 | RGD1559724 | 299021 |
| 2.583351  | down | XM_001060803 | RGD1559834 | 367816 |
| 2.6660738 | down | XM_001081019 | RGD1559940 | 503115 |
| 2.4695218 | down | XM_001061907 | RGD1559963 | 310284 |
| 2.3503814 | down | XM_001073916 | RGD1560076 | 294722 |
| 2.0803752 | down | XM_001057578 | RGD1560099 | 302388 |
| 2.1411493 | down | XM_001071572 | RGD1560716 | 298444 |
| 7.894291  | down | XM_001075200 | RGD1560826 | 295423 |
| 2.1948798 | down | XM_343494    | RGD1561176 | 363155 |
| 2.0521796 | down | XM_001075088 | RGD1561178 | 295420 |
| 2.1782706 | down | XM_001081153 | RGD1561317 | 366191 |
| 2.146464  | down | XM_001066702 | RGD1561318 | 317568 |
| 2.3715818 | down | XM_001059755 | RGD1561394 | 311743 |
| 2.8438923 | down | XM_344159    | RGD1561635 | 364023 |
| 4.900081  | down | XM_001078200 | RGD1561881 | 293876 |
| 3.1257105 | down | XM_001070383 | RGD1562020 | 290820 |
| 2.7434926 | down | XM_001062088 | RGD1562143 | 299504 |
| 4.4683475 | down | XM_001058517 | RGD1562165 | 366374 |
| 3.114225  | down | XM_001053572 | RGD1562266 | 364863 |
| 3.038725  | down | XM_001081708 | RGD1562394 | 364129 |
| 2.4676418 | down | XM_001059720 | RGD1562397 | 364060 |
| 2.8996987 | down | XM_001071419 | RGD1562489 | 287250 |
| 2.6997879 | down | XM_001073075 | RGD1562500 | 498096 |
| 2.9723172 | down | XM_001080210 | RGD1562542 | 294077 |
| 2.5242195 | down | XM_001053283 | RGD1562658 | 498278 |
| 2.038074  | down | XM_001055403 | RGD1562755 | 289656 |
| 2.7947726 | down | XM_001080078 | RGD1562814 | 366866 |
| 2.4669845 | down | XM_001071898 | RGD1562978 | 502911 |
| 2.369399  | down | XM_001074453 | RGD1563157 | 298910 |
| 3.8542578 | down | XM_577969    | RGD1563254 | 502488 |
| 2.0039635 | down | XM_001061078 | RGD1563579 | 367874 |
| 4.321126  | down | XM_001068593 | RGD1563636 | 292466 |
| 4.3308387 | down | XM_001068508 | RGD1563658 | 366058 |
| 2.0861356 | down | XM_001070015 | RGD1563739 | 289930 |
| 2.4602358 | down | XM_001076316 | RGD1563757 | 367030 |
| 2.01963   | down | XM_001053961 | RGD1564071 | 363748 |
| 2.8190625 | down | XM_001068761 | RGD1564088 | 291290 |
| 2.1528409 | down | XM_001074520 | RGD1564379 | 499758 |
| 3.15561   | down | XM_001060995 | RGD1564899 | 498579 |
| 2.9011655 | down | XM_001081651 | RGD1565238 | 498019 |
| 4.4284315 | down | XM_001056445 | RGD1565579 | 367860 |



|           |      |              |            |        |
|-----------|------|--------------|------------|--------|
| 2.406553  | down | XM_001077692 | RGD1565599 | 502599 |
| 2.8010182 | down | XM_001059981 | RGD1565767 | 311120 |
| 2.738117  | down | XM_001063845 | RGD1565894 | 291561 |
| 2.9863129 | down | XM_235089    | RGD1566161 | 314782 |
| 2.1153905 | down | XM_001079348 | RGD1566207 | 366139 |
| 2.3471327 | down | XM_001078793 | RGD1566281 | 364480 |
| 2.1280413 | down | XM_001056130 | RGD1566311 | 500963 |
| 2.1226113 | down | NM_139040    | RGD621098  | 207123 |
| 2.2826333 | down | XM_001081746 | Rhbdf2     | 303690 |
| 2.5569365 | down | XM_001080699 | Rilp       | 287531 |
| 2.2677875 | down | NM_212549    | Ring1      | 309626 |
| 2.189146  | down | NM_001033702 | Rnf126     | 314613 |
| 2.0257425 | down | XM_001067906 | Rnf145     | 287212 |
| 3.1206245 | down | XM_001064065 | Rnf216     | 304294 |
| 2.008361  | down | NM_013022    | Rock2      | 25537  |
| 2.6121602 | down | XM_001077212 | Rpl29-ps2  | 691206 |
| 5.155535  | down | NM_031570    | Rps7       | 29258  |
| 2.0330422 | down | NM_138881    | Rsad2      | 65190  |
| 3.706712  | down | XM_001059176 | Rspo3      | 498997 |
| 2.6692867 | down | NM_001008833 | RT1-CE10   | 414792 |
| 2.309804  | down | NM_001008834 | RT1-CE11   | 414791 |
| 2.4001737 | down | NM_001008835 | RT1-CE12   | 309600 |
| 2.9299657 | down | NM_001008845 | RT1-CE7    | 368153 |
| 2.5571706 | down | NM_206848    | RT1-C1     | 24977  |
| 2.0052907 | down | NM_017301    | S1pr1      | 29733  |
| 2.146008  | down | XM_001067905 | Saps3      | 309144 |
| 2.2069728 | down | XM_001074344 | Scamp3     | 65169  |
| 2.3276858 | down | XM_001057528 | Scarf1     | 303313 |
| 2.0684173 | down | NM_031841    | Scd        | 83792  |
| 2.0395026 | down | XM_001077553 | Scube2     | 499241 |
| 2.4841754 | down | XM_001080769 | Sec1       | 308586 |
| 2.0438998 | down | NM_177933    | Sel1l      | 314352 |
| 2.3767114 | down | NM_001079942 | Sema3b     | 363142 |
| 2.0499961 | down | XM_001077367 | Sema6d     | 311384 |
| 2.5481954 | down | NM_058210    | Sf1        | 117855 |
| 2.1666071 | down | NM_001077826 | Shisa4     | 360848 |
| 2.1058934 | down | NM_001006989 | Shisa5     | 301013 |
| 2.6348786 | down | NM_001015036 | Siat7F     | 407765 |
| 3.2194288 | down | XM_001068825 | Sidt2      | 315617 |
| 2.0491107 | down | NM_019229    | Slc12a4    | 29501  |
| 2.1602037 | down | XM_001066528 | Slc12a6    | 691209 |
| 2.9318247 | down | NM_017302    | Slc16a7    | 29735  |
| 2.0770376 | down | NM_022270    | Slc22a4    | 64037  |
| 2.991711  | down | NM_019269    | Slc22a5    | 29726  |

|           |      |              |          |        |
|-----------|------|--------------|----------|--------|
| 2.3954003 | down | NM_001017488 | Slc24a6  | 498185 |
| 2.3532808 | down | XM_342445    | Slc25a12 | 362145 |
| 2.763128  | down | XM_001069918 | Slc25a44 | 365841 |
| 2.7709355 | down | XM_001079409 | Slc27a4  | 311839 |
| 2.6132743 | down | NM_031664    | Slc28a2  | 60423  |
| 2.786641  | down | NM_031684    | Slc29a1  | 63997  |
| 2.336503  | down | NM_012751    | Slc2a4   | 25139  |
| 2.274299  | down | NM_181090    | Slc38a2  | 29642  |
| 2.5350485 | down | NM_145776    | Slc38a3  | 252919 |
| 2.8022072 | down | NM_001039196 | Slc39a13 | 295928 |
| 2.2420156 | down | XM_001080703 | Slc43a2  | 287532 |
| 2.2979538 | down | NM_017049    | Slc4a3   | 24781  |
| 2.1634905 | down | NM_130746    | Slc5a6   | 170551 |
| 5.3909163 | down | NM_017206    | Slc6a6   | 29464  |
| 2.6261635 | down | NM_017348    | Slc6a8   | 50690  |
| 3.584671  | down | NM_177481    | Slco3a1  | 140915 |
| 2.3531563 | down | NM_019349    | Slk      | 54308  |
| 3.8178911 | down | XM_001077609 | Smcr7    | 497916 |
| 2.0926437 | down | XM_001053117 | Smoc2    | 292401 |
| 2.0900323 | down | XM_001053796 | Smtnl2   | 679629 |
| 2.046237  | down | XM_001066311 | Smyd2    | 289372 |
| 3.1299634 | down | NM_031688    | Sncg     | 64347  |
| 3.0760033 | down | XM_001067142 | Sntb1    | 299940 |
| 2.1863694 | down | XM_217115    | Sorl1    | 300652 |
| 3.2666845 | down | XM_001061383 | Spire1   | 307348 |
| 8.615779  | down | XM_001079265 | Srl      | 302948 |
| 2.1660442 | down | XM_233556    | Srrm1    | 313620 |
| 2.4118962 | down | XM_001080435 | Ssh1     | 304580 |
| 2.0069463 | down | NM_175597    | Ssx2ip   | 308023 |
| 2.902086  | down | NM_031695    | St3gal2  | 64442  |
| 2.2006502 | down | NM_031337    | St3gal5  | 83505  |
| 2.5358582 | down | NM_001012085 | Stam2    | 311030 |
| 2.038714  | down | XM_001081093 | Stard7   | 296128 |
| 2.139544  | down | XM_001068833 | Stard8   | 312113 |
| 2.087413  | down | NM_012747    | Stat3    | 25125  |
| 2.1930132 | down | NM_134466    | Stau2    | 171500 |
| 3.014088  | down | XM_001069624 | Stim1    | 361618 |
| 2.0800164 | down | NM_001011965 | Stom     | 296655 |
| 2.0041072 | down | NM_013038    | Stxbp1   | 25558  |
| 2.615189  | down | XM_001080796 | Supt6h   | 303281 |
| 2.1269457 | down | NM_001033868 | Surf4    | 619346 |
| 2.0082037 | down | XM_001068585 | Suv420h1 | 361688 |
| 2.5421133 | down | XM_001056293 | Svil     | 361256 |
| 2.0095801 | down | XM_001060926 | Sync     | 362606 |

|           |      |              |          |        |
|-----------|------|--------------|----------|--------|
| 2.5753763 | down | NM_053553    | Syngn2   | 89815  |
| 2.9847853 | down | XM_001055657 | Synm     | 308709 |
| 2.3467472 | down | XM_001074385 | Synpo2   | 499702 |
| 5.6425505 | down | XM_001064648 | Synpo2l  | 305675 |
| 2.377336  | down | XM_001071432 | Sypl2    | 362018 |
| 2.333312  | down | NM_001012152 | Tbc1d14  | 360956 |
| 2.0295544 | down | XM_001056572 | Tbl1xr1  | 365755 |
| 4.1418185 | down | XM_001062167 | Tbx15    | 295315 |
| 2.7087653 | down | XM_001065059 | Tcf3     | 312451 |
| 3.2906473 | down | NM_031578    | Tesk1    | 29460  |
| 2.951199  | down | XM_001081600 | Tex2     | 303611 |
| 3.069057  | down | XM_001072774 | Tfrc     | 64678  |
| 3.2638643 | down | NM_012740    | Th       | 25085  |
| 2.411838  | down | NM_031771    | Thbd     | 83580  |
| 3.4522252 | down | NM_001013062 | Thbs1    | 445442 |
| 2.0306695 | down | NM_001017960 | Thra     | 81812  |
| 2.4193668 | down | NM_001009693 | Thrap3   | 313591 |
| 2.259414  | down | NM_053773    | Tjp2     | 115769 |
| 3.1126647 | down | XM_001053379 | Tln1     | 313494 |
| 4.274692  | down | NM_001007713 | Tmbim1   | 316516 |
| 2.7930927 | down | XM_001059693 | Tmcc2    | 305095 |
| 2.3073614 | down | NM_001034949 | Tmco4    | 500573 |
| 2.2125404 | down | XM_001061814 | Tmem129  | 305458 |
| 2.0354877 | down | NM_178021    | Tmem132a | 338474 |
| 2.2348864 | down | XM_001079995 | Tmem143  | 308593 |
| 2.4233341 | down | NM_057212    | Tmem158  | 117582 |
| 2.195924  | down | XM_001076493 | Tmem184b | 362959 |
| 2.1711562 | down | XM_001053713 | Tmem185a | 309357 |
| 2.9344053 | down | XM_001061935 | Tmem63a  | 289318 |
| 2.261035  | down | XM_001064861 | Tmem63b  | 363197 |
| 2.2083628 | down | XM_001081259 | Tmx4     | 296182 |
| 2.8539546 | down | XM_001067689 | Tnfrsf21 | 316256 |
| 2.2361085 | down | XM_001080123 | Tnks2    | 309512 |
| 7.329537  | down | NM_001034105 | Tnnc1    | 290561 |
| 6.3649735 | down | NM_134388    | Tnnt1    | 171409 |
| 2.781977  | down | NM_001007146 | Tob2     | 315159 |
| 2.308192  | down | NM_031357    | Tpp1     | 83534  |
| 2.3807926 | down | XM_001068491 | Trappe9  | 315059 |
| 3.4490924 | down | NM_023985    | Trib1    | 78969  |
| 2.1735091 | down | NM_001025142 | Trim35   | 498538 |
| 2.3022277 | down | NM_001004090 | Tspan5   | 362048 |
| 2.1483507 | down | NM_001013214 | Ttc4     | 362556 |
| 2.5161896 | down | NM_001011995 | Tuba1c   | 300218 |
| 2.0540063 | down | NM_031614    | Txnrd1   | 58819  |

|           |      |              |         |        |
|-----------|------|--------------|---------|--------|
| 3.483637  | down | XM_001077658 | U2af2   | 308335 |
| 2.4030392 | down | XM_001081723 | Ube2o   | 303689 |
| 2.2437162 | down | NM_001037643 | Ube2z   | 303478 |
| 2.3493235 | down | XM_001074121 | Ubqln4  | 310633 |
| 2.3166728 | down | XM_001076724 | Unc84b  | 315135 |
| 2.0477154 | down | XM_001081707 | Unk     | 360663 |
| 2.0759985 | down | NM_001001516 | Usp19   | 361190 |
| 2.0713022 | down | XM_001070037 | Usp28   | 315639 |
| 2.2770789 | down | XM_001080428 | Usp30   | 304579 |
| 2.379507  | down | XM_001063162 | Usp5    | 297593 |
| 2.00357   | down | NM_013090    | Vamp1   | 25624  |
| 2.7587414 | down | XM_001066524 | Vash2   | 498309 |
| 2.4385476 | down | XM_001057629 | Vcl     | 305679 |
| 2.06068   | down | XM_001058013 | Vgll2   | 309772 |
| 2.1769507 | down | NM_013155    | Vldlr   | 25696  |
| 3.604743  | down | NM_001013170 | Wars    | 314442 |
| 2.3041856 | down | NM_001009661 | Wbp11   | 297695 |
| 2.6789675 | down | NM_138975    | Wbp2    | 192645 |
| 2.0867481 | down | NM_001014135 | Wdr1    | 360950 |
| 2.8853447 | down | XM_001075797 | Wdr62   | 308492 |
| 2.1431231 | down | NM_023975    | Wdr7    | 66031  |
| 4.863394  | down | XM_001077697 | Xirp1   | 316071 |
| 2.0413888 | down | XM_001079683 | Ybx2    | 303250 |
| 2.0864377 | down | NM_019376    | Ywhag   | 56010  |
| 3.448511  | down | NM_001039338 | Zdhhc5  | 362156 |
| 2.0070956 | down | XM_001053455 | Zfp212  | 297066 |
| 2.1437082 | down | NM_022678    | Zfp238  | 64619  |
| 2.346958  | down | NM_001036626 | Zfp36l2 | 298765 |
| 2.6507993 | down | NM_001034830 | Zfp384  | 171018 |
| 2.2654312 | down | XM_001061052 | Zfp407  | 307213 |
| 2.4031687 | down | NM_203367    | Zmynd11 | 291259 |
| 2.2494397 | down | XM_230846    | Zswim1  | 311631 |
| 2.3455925 | down | XM_001080236 | Zzef1   | 287476 |

---
